# Supplementary material for: First transcriptome analysis of bryozoan Fredericella sultana, the primary host of myxozoan parasite Tetracapsuloides bryosalmonae
Source: PubMed Central journal article supplement (PMC7194087; doi:10.7717/peerj.9027), 2020-04-28
Supplement: peerj-08-9027-s002.pdf [file peerj-08-9027-s002.pdf]

**Supplementary Data 1:** Description of sequencing data and transcriptome assembly statistics of three replicate zooid samples.

| Transcriptome feature                                                              | Replicates            |                       |                       |
|------------------------------------------------------------------------------------|-----------------------|-----------------------|-----------------------|
|                                                                                    | Zooid 1               | Zooid 2               | Zooid 3               |
| Raw reads (paired)                                                                 | 47,040,144            | 42,691,704            | 41,354,820            |
| Paired reads after quality control                                                 | 42,441,722            | 39,040,613            | 37,161,830            |
| Duplicated reads                                                                   | 142,699<br>(0.34%)    | 119,997<br>(0.31%)    | 120,536<br>(0.32%)    |
| Assembly parameter: <i>k-mer</i> /bubble size                                      | 35/300                | 35/300                | 35/300                |
| Assembled contigs                                                                  | 92,581                | 83,011                | 74,811                |
| Contigs after redundancy filtration                                                | 90,145                | 80,634                | 72,740                |
| Average length (bp)                                                                | 642                   | 665                   | 690                   |
| N50                                                                                | 919                   | 1,015                 | 1,108                 |
| GC content                                                                         | 51.8%                 | 52.7%                 | 52.9%                 |
| Trimmed reads mapped to respective replicate assembly                              | 38,560,038<br>(90.8%) | 35,722,612<br>(91.5%) | 33,787,617<br>(90.9%) |
| Trimmed reads mapped to combined assembly (generated from all three zooid samples) | 38,241,072<br>(90.1%) | 35,140,999<br>(90%)   | 33,485,514<br>(90.1%) |
