# Supplementary material for: First transcriptome analysis of bryozoan Fredericella sultana, the primary host of myxozoan parasite Tetracapsuloides bryosalmonae
Source: PeerJ. 2020 Apr 28;8:e9027. doi: 10.7717/peerj.9027 (PMC7194087; doi:10.7717/peerj.9027)
Supplement: Table S1 — KEGG orthology (KO) assignment. Reference organisms used for KO analysis, list of KO terms assigned to annotated F. sultana contigs and list of KEGG pathways associated with assigned KO terms. [file peerj-08-9027-s003.xlsx]

## Sheet: Reference organisms for KAAS
Category	Organism	Number of sequences
Ascidians	cin	13713
Nematodes	cel	20185
	cbr	19414
	bmy	11371
	loa	14915
	nai	19165
	tsp	16392
Annelids	hro	23426
Mollusks	lgi	23818
	pcan	21144
	crg	28410
	myi	24532
	obi	15855
Brachiopodas	lak	27068
Flatworms	smm	10711
	shx	10849
	ovi	16356
	egl	11331
Cnidarians	nve	24773
	epa	22199
	adf	26073
	amil	23710
	pdam	19935
	spis	24846
	dgt	22045
	hmg	20057
Placozoans	tad	11538
Poriferans	aqu	20788
Total		544619

## Sheet: KEGG Orthology (KO) assignment
F. sultana contig ID	Blast2GO Gene Description	Blast2GO e-Value	KEGG Orthology (KO) identifier
SPF_FS5_contig_1	Endoglucanase E-4	1.17395e-176	K01179
SPF_FS5_contig_4	calsyntenin-1-like isoform X1	1.29046e-54	K22659
SPF_FS5_contig_6	high affinity cGMP-specific 3',5'-cyclic phosphodiesterase 9A-like isoform X1	0	K13761
SPF_FS5_contig_7	40S ribosomal protein S13	1.13686e-97	K02953
SPF_FS5_contig_8	cytochrome c oxidase subunit 2 (mitochondrion)	1.03482e-114	K02261
SPF_FS5_contig_9	insoluble matrix shell protein 5	2.38216e-14
SPF_FS5_contig_11	zinc transporter 9-like	9.54169e-158	K14696
SPF_FS5_contig_12	E3 ubiquitin-protein ligase TRIP12 isoform X2	0	K10590
SPF_FS5_contig_14	catenin beta-like	0	K02105
SPF_FS5_contig_18	UNKNOWN	1.85452e-53
SPF_FS5_contig_20	insulin-like growth factor-binding protein-related protein 1	1.56422e-52
SPF_FS5_contig_21	malignant fibrous histiocytoma-amplified sequence 1 homolog	3.35326e-75
SPF_FS5_contig_22	Tubulin beta-4B chain	0	K07375
SPF_FS5_contig_23	guanine nucleotide-binding protein subunit beta	0	K04536
SPF_FS5_contig_24	cAMP-responsive element modulator-like isoform X1	3.6745e-48	K09052
SPF_FS5_contig_25	gonadotropin-releasing hormone II receptor-like	2.48348e-17	K08376
SPF_FS5_contig_26	E3 ubiquitin-protein ligase MIB1	0
SPF_FS5_contig_28	cdc42 homolog	2.9202e-112	K04393
SPF_FS5_contig_29	40S ribosomal protein S3a	1.31453e-140	K02984
SPF_FS5_contig_30	40S ribosomal protein S2	1.29211e-150	K02981
SPF_FS5_contig_31	T-complex protein 1 subunit zeta	0	K09498
SPF_FS5_contig_33	arginine-glutamic acid dipeptide repeats protein-like isoform X1	1.21179e-105	K05628
SPF_FS5_contig_35	porphobilinogen deaminase	3.15619e-103	K01749
SPF_FS5_contig_36	soma ferritin-like	6.45397e-90	K00522
SPF_FS5_contig_37	cubilin-like	8.53753e-28	K14616
SPF_FS5_contig_40	heat shock cognate 71 kDa protein	0	K03283
SPF_FS5_contig_41	myosin regulatory light chain	4.36178e-65	K12757
SPF_FS5_contig_42	uncharacterized protein LOC106157198	1.4387e-19
SPF_FS5_contig_44	40S ribosomal protein S5	2.97555e-129	K02989
SPF_FS5_contig_45	gastrula zinc finger protein XlCGF17.1-like	1.06466e-80	K09228
SPF_FS5_contig_46	cytochrome c oxidase subunit III (mitochondrion)	3.0648e-93	K02262
SPF_FS5_contig_47	cytochrome c oxidase subunit III (mitochondrion)	7.57672e-115	K02262
SPF_FS5_contig_49	NADH dehydrogenase subunit 5 (mitochondrion)	0
SPF_FS5_contig_50	syndecan	7.09538e-19	K16336
SPF_FS5_contig_51	cytochrome c oxidase subunit 1 (mitochondrion)	6.95e-89	K02256
SPF_FS5_contig_52	cytochrome c oxidase subunit 1 (mitochondrion)	4.43595e-94	K02256
SPF_FS5_contig_54	pterin-4-alpha-carbinolamine dehydratase-like	2.78338e-57	K01724
SPF_FS5_contig_55	dynein heavy chain 5, axonemal-like	0	K10408
SPF_FS5_contig_56	disintegrin and metalloproteinase domain-containing protein 10 isoform X1	3.49763e-154	K06704
SPF_FS5_contig_57	actin-related protein 3	0	K18584
SPF_FS5_contig_60	40S ribosomal protein S14	8.36593e-87	K02955
SPF_FS5_contig_62	annexin A4-like isoform X1	1.26862e-116	K17095
SPF_FS5_contig_63	galectin 4-like protein transcript variant	3.05595e-63	K10093
SPF_FS5_contig_65	PHD finger protein 13-like	1.30549e-42
SPF_FS5_contig_66	death ligand signal enhancer-like isoform X1	7.53439e-14
SPF_FS5_contig_68	uncharacterized protein LOC111863443	4.49286e-05
SPF_FS5_contig_69	putative serine protease K12H4.7	0
SPF_FS5_contig_72	vascular endothelial growth factor A-A-like isoform X1	1.47448e-18	K05449
SPF_FS5_contig_74	blastula protease 10-like	1.31154e-30	K08076
SPF_FS5_contig_76	nucleolin-like isoform X1	9.01088e-46	K11294
SPF_FS5_contig_77	serine/threonine-protein phosphatase PP1-alpha catalytic subunit	0	K06269
SPF_FS5_contig_78	heat shock protein 83	0	K04079
SPF_FS5_contig_79	renin receptor-like	2.33151e-36	K19514
SPF_FS5_contig_80	Golgi-associated plant pathogenesis-related protein 1	5.9392e-28
SPF_FS5_contig_81	60S ribosomal protein L32	9.72466e-80	K02912
SPF_FS5_contig_82	prefoldin subunit 3	1.95137e-80
SPF_FS5_contig_84	dimethylaniline monooxygenase [N-oxide-forming] 5-like	1.30576e-143	K00485
SPF_FS5_contig_85	probable serine carboxypeptidase CPVL isoform X1	0	K09645
SPF_FS5_contig_86	polyadenylate-binding protein 1	0	K13126
SPF_FS5_contig_87	UTP--glucose-1-phosphate uridylyltransferase	0	K00963
SPF_FS5_contig_88	60S ribosomal protein L27a	6.08081e-65	K02900
SPF_FS5_contig_89	N,N'-diacetylchitobiase precursor	0	K12373
SPF_FS5_contig_93	KN motif and ankyrin repeat domain-containing protein 1-like isoform X1	5.27252e-18	K22808
SPF_FS5_contig_94	SAP30-binding protein-like	2.38418e-40
SPF_FS5_contig_95	Malate dehydrogenase, cytoplasmic	5.15283e-152	K00025
SPF_FS5_contig_96	protein SET-like	3.39994e-103	K11290
SPF_FS5_contig_97	microsomal glutathione S-transferase 1	2.90023e-28	K00799
SPF_FS5_contig_98	microsomal glutathione S-transferase 1-like	1.55625e-27	K00799
SPF_FS5_contig_99	Vacuolar protein sorting-associated protein 4B	1.7663e-152	K12196
SPF_FS5_contig_100	eukaryotic translation initiation factor 3 subunit M	1.28492e-137	K15030
SPF_FS5_contig_101	myosin regulatory light chain	1.56895e-61	K12757
SPF_FS5_contig_102	Cytochrome c oxidase subunit 6C-2	1.27185e-14	K02268
SPF_FS5_contig_103	calreticulin	1.00493e-173	K08057
SPF_FS5_contig_104	ribosomal protein S6	1.06039e-104	K02991
SPF_FS5_contig_105	gtp-binding nuclear protein ran	3.04166e-100	K07936
SPF_FS5_contig_106	solute carrier family 2, facilitated glucose transporter member 4 isoform X1	4.16577e-39	K07299
SPF_FS5_contig_107	S-phase kinase-associated protein 1	6.62387e-86	K03094
SPF_FS5_contig_108	cytochrome b (mitochondrion)	6.67811e-84	K00412
SPF_FS5_contig_109	serine palmitoyltransferase 2-like	0	K00654
SPF_FS5_contig_110	E3 ubiquitin-protein ligase rnf213-alpha-like isoform X1	0	K22754
SPF_FS5_contig_113	eukaryotic translation initiation factor 4H-like	2.48234e-36
SPF_FS5_contig_114	nuclear factor NF-kappa-B p105 subunit-like	9.38676e-63	K02580
SPF_FS5_contig_115	serine proteinase stubble-like	9.07186e-48	K20111
SPF_FS5_contig_116	phosphatidylinositol 4-kinase type 2-beta	0	K13711
SPF_FS5_contig_117	actin, adductor muscle	0	K05692
SPF_FS5_contig_118	sorting nexin-12-like	1.71128e-82	K17918
SPF_FS5_contig_119	Y-box factor homolog	2.65807e-51	K09276
SPF_FS5_contig_120	dnaJ homolog subfamily B member 5 isoform X2	4.31306e-88	K09511
SPF_FS5_contig_121	sarcoplasmic calcium-binding proteins I, III, and IV-like	9.69466e-65
SPF_FS5_contig_123	neutral ceramidase-like	0	K12349
SPF_FS5_contig_125	mammalian ependymin-related protein 1-like	7.11375e-24
SPF_FS5_contig_126	cathepsin L1-like	2.7481e-62	K01365
SPF_FS5_contig_127	60S ribosomal protein L9	2.73046e-82	K02940
SPF_FS5_contig_131	tumor protein p53-inducible nuclear protein 2	7.12172e-12	K21247
SPF_FS5_contig_132	E3 ubiquitin-protein ligase SH3RF1 isoform X1	5.41715e-61	K12171
SPF_FS5_contig_133	innexin unc-9 isoform X6	5.95913e-117	K22037
SPF_FS5_contig_134	Phosphate carrier protein, mitochondrial	3.93165e-163	K15102
SPF_FS5_contig_135	uncharacterized protein LOC106179632	6.29444e-28
SPF_FS5_contig_136	selenoprotein W-like	3.29756e-25	K01365
SPF_FS5_contig_137	hypothetical protein LOTGIDRAFT_232951	1.82331e-07
SPF_FS5_contig_139	Chorion peroxidase	4.82252e-68	K19511
SPF_FS5_contig_141	plexin-A2 isoform X1	0	K06820
SPF_FS5_contig_144	ATP synthase lipid-binding protein, mitochondrial	4.67856e-19	K02128
SPF_FS5_contig_147	hydroxyacid oxidase 1	2.72174e-97	K11517
SPF_FS5_contig_148	Hydroxyacid oxidase 1	8.35984e-32	K11517
SPF_FS5_contig_149	Receptor-interacting serine/threonine-protein kinase 1	2.09938e-36	K02861
SPF_FS5_contig_150	UPF0536 protein C12orf66 homolog	3.2277e-97	K23297
SPF_FS5_contig_151	disrupted in renal carcinoma protein 2-like	2.8713e-72	K15381
SPF_FS5_contig_152	mitochondrial ATP synthase subunit b precursor	7.17134e-82	K02127
SPF_FS5_contig_153	E3 ubiquitin-protein ligase RNF13	5.16567e-47	K15692
SPF_FS5_contig_154	MAP kinase-interacting serine/threonine-protein kinase 1-like	7.33001e-155	K04372
SPF_FS5_contig_155	4-hydroxyphenylpyruvate dioxygenase	0	K00457
SPF_FS5_contig_157	retinal dehydrogenase 2-like	0	K00128
SPF_FS5_contig_158	EGF domain-specific O-linked N-acetylglucosamine transferase	3.84011e-12
SPF_FS5_contig_159	pancreatic alpha-amylase	0	K01176
SPF_FS5_contig_160	eukaryotic translation initiation factor 3 subunit A	0	K03254
SPF_FS5_contig_163	Myosin alkali light chain 1	2.45296e-77	K12751
SPF_FS5_contig_164	glutathione S-transferase	4.0534e-15	K04097
SPF_FS5_contig_166	DNA-(apurinic or apyrimidinic site) lyase-like	7.01873e-128	K10771
SPF_FS5_contig_168	Cathepsin L	6.47563e-159	K01365
SPF_FS5_contig_170	major facilitator superfamily domain-containing protein 7-like isoform X1	6.79905e-113	K12306
SPF_FS5_contig_171	dynein gamma chain, flagellar outer arm-like	0	K10408
SPF_FS5_contig_172	uncharacterized protein LOC106170172	0
SPF_FS5_contig_173	CCR4-NOT transcription complex subunit 11-like isoform X2	0
SPF_FS5_contig_174	CD109 antigen-like isoform X2	3.77296e-35	K06530
SPF_FS5_contig_175	epidermal growth factor receptor substrate 15-like 1 isoform X4	1.08483e-151	K12472
SPF_FS5_contig_176	alpha-L-fucosidase-like isoform X1	0	K01206
SPF_FS5_contig_177	digestive cysteine proteinase 1	0
SPF_FS5_contig_181	E3 ubiquitin-protein ligase ARI4	1.96506e-32	K11968
SPF_FS5_contig_182	ubiquitin-protein ligase E3B	0	K10588
SPF_FS5_contig_183	60S ribosomal protein L28	2.07057e-55	K02903
SPF_FS5_contig_184	aldehyde dehydrogenase, mitochondrial	0	K00128
SPF_FS5_contig_185	transformer-2 protein homolog alpha-like isoform X1	2.23313e-51	K12897
SPF_FS5_contig_186	transcription factor 7-like 2 isoform X1	1.19717e-86	K04491
SPF_FS5_contig_187	40S ribosomal protein S3	8.26956e-139	K02985
SPF_FS5_contig_188	insoluble matrix shell protein 5	1.573e-12	K02183
SPF_FS5_contig_190	protein BTG2	8.96497e-34	K14443
SPF_FS5_contig_191	long-chain-fatty-acid--CoA ligase 1-like	0	K01897
SPF_FS5_contig_192	myosin heavy chain, striated muscle-like	0	K17751
SPF_FS5_contig_193	myosin heavy chain, striated muscle-like	0	K17751
SPF_FS5_contig_194	inositol monophosphatase 3-like	1.85943e-77	K15759
SPF_FS5_contig_195	40S ribosomal protein S9	3.06411e-109	K02997
SPF_FS5_contig_196	60S ribosomal protein L7	8.35508e-134	K02937
SPF_FS5_contig_197	lysosome membrane protein 2-like	3.69095e-126	K12384
SPF_FS5_contig_198	Golgi-associated plant pathogenesis-related protein 1	2.15432e-37
SPF_FS5_contig_199	mitochondria-eating protein-like isoform X3	8.39529e-85	K22257
SPF_FS5_contig_200	nucleolin isoform X2	6.61114e-36	K11294
SPF_FS5_contig_202	serine protease 27-like	5.44329e-47	K01346
SPF_FS5_contig_203	serine/threonine-protein kinase Nek4-like	1.86288e-27	K08857
SPF_FS5_contig_205	cathepsin L1	4.58844e-121	K01365
SPF_FS5_contig_210	dipeptidyl peptidase 1 isoform X1	8.78844e-176	K01275
SPF_FS5_contig_211	NADH dehydrogenase [ubiquinone] 1 alpha subcomplex subunit 10, mitochondrial	1.7916e-66	K03954
SPF_FS5_contig_212	sodium-independent sulfate anion transporter	3.74756e-157	K14708
SPF_FS5_contig_213	gastrula zinc finger protein XlCGF49.1-like	1.64805e-36	K09228
SPF_FS5_contig_220	far upstream element-binding protein 1-like isoform X2	1.17627e-83	K13210
SPF_FS5_contig_221	casein kinase I-like isoform X6	8.20243e-164	K08958
SPF_FS5_contig_222	acid-sensing ion channel 1-like	1.93739e-11	K04832
SPF_FS5_contig_224	acid-sensing ion channel 1	2.66326e-27	K03440
SPF_FS5_contig_225	FYVE, RhoGEF and PH domain-containing protein 6	3.23148e-142
SPF_FS5_contig_226	cholesterol 7-alpha-monooxygenase-like	5.89334e-159	K00489
SPF_FS5_contig_229	puromycin-sensitive aminopeptidase-like	0	K08776
SPF_FS5_contig_231	60S ribosomal protein L37a	5.5321e-46	K02921
SPF_FS5_contig_233	beta,beta-carotene 9',10'-oxygenase-like	4.46261e-108	K10252
SPF_FS5_contig_234	heterogeneous nuclear ribonucleoprotein H2-like	1.35119e-61	K12898
SPF_FS5_contig_235	glycogen synthase kinase-3 beta	0	K03083
SPF_FS5_contig_237	Chloride intracellular channel exc-4	2.19882e-60	K05022
SPF_FS5_contig_238	60S ribosomal protein L18a	6.30849e-100	K02882
SPF_FS5_contig_239	serine protease hepsin	6.17437e-87	K20111
SPF_FS5_contig_240	multidrug resistance protein 1	0	K05658
SPF_FS5_contig_243	ATP synthase subunit alpha, mitochondrial	0	K02132
SPF_FS5_contig_244	5'-AMP-activated protein kinase catalytic subunit alpha-2-like isoform X14	0	K07198
SPF_FS5_contig_245	Solute carrier family 35 member F1	1.84556e-06
SPF_FS5_contig_247	tectonin beta-propeller repeat-containing protein 1-like	4.08322e-48	K23881
SPF_FS5_contig_248	lectin L6-like	9.48231e-47	K23881
SPF_FS5_contig_249	acid ceramidase-like	2.78484e-147	K12348
SPF_FS5_contig_251	gastric triacylglycerol lipase	8.4315e-12	K01052
SPF_FS5_contig_253	gastric triacylglycerol lipase-like	1.47146e-102	K01052
SPF_FS5_contig_256	ubiquitin-conjugating enzyme E2 R2-like	5.50569e-116	K02207
SPF_FS5_contig_257	cathepsin B	2.94646e-144	K01363
SPF_FS5_contig_258	40S ribosomal protein SA-like	1.05138e-126	K02998
SPF_FS5_contig_260	glutathione S-transferase pi	9.66229e-75	K23790
SPF_FS5_contig_261	myosin-2 essential light chain isoform X2	8.81944e-50	K12751
SPF_FS5_contig_262	enolase	0	K01689
SPF_FS5_contig_263	3-methyl-2-oxobutanoate dehydrogenase [lipoamide] kinase, mitochondrial	3.86687e-154	K00905
SPF_FS5_contig_264	blastula protease 10-like	1.32251e-42	K13046
SPF_FS5_contig_265	glutamate--cysteine ligase catalytic subunit	1.87822e-168	K11204
SPF_FS5_contig_266	ornithine aminotransferase, mitochondrial-like	0	K00819
SPF_FS5_contig_267	glutathione S-transferase	5.92701e-06
SPF_FS5_contig_273	Transmembrane 9 superfamily member 4	0	K17086
SPF_FS5_contig_275	predicted protein	8.10683e-38	K13046
SPF_FS5_contig_276	semaphorin-5A	6.63144e-14	K17341
SPF_FS5_contig_277	glutathione S-transferase 4-like	1.79946e-29	K04097
SPF_FS5_contig_278	ornithine decarboxylase-like	4.02558e-148	K01581
SPF_FS5_contig_281	nucleobindin-2-like isoform X1	3.06395e-83	K20371
SPF_FS5_contig_283	transmembrane protein 97	6.61093e-43
SPF_FS5_contig_284	60S ribosomal protein L7a-like	1.08505e-129	K02936
SPF_FS5_contig_285	interferon regulatory factor 2	5.96069e-24	K10153
SPF_FS5_contig_286	predicted protein	2.6194e-51
SPF_FS5_contig_287	splicing factor 3A subunit 3	0	K12827
SPF_FS5_contig_288	tolkin	7.08067e-121	K13047
SPF_FS5_contig_290	paramyosin-like isoform X2	0
SPF_FS5_contig_292	cytochrome b5	1.60497e-39	K23490
SPF_FS5_contig_294	protein BTG2	6.24232e-33	K14443
SPF_FS5_contig_295	Zinc-binding alcohol dehydrogenase domain-containing protein 2	1.54537e-137	K07119
SPF_FS5_contig_297	cytochrome b (mitochondrion)	2.5755e-121	K00412
SPF_FS5_contig_298	sushi, von Willebrand factor type A, EGF and pentraxin domain-containing protein 1 isoform X1	1.27833e-22
SPF_FS5_contig_299	C-type lectin domain family 4 member D	4.07207e-07	K10063
SPF_FS5_contig_300	brain tumor protein	9.44278e-07
SPF_FS5_contig_302	sulfotransferase 6B1-like	7.54635e-58	K01025
SPF_FS5_contig_305	transient receptor potential cation channel subfamily M member 1 isoform X4	0	K04978
SPF_FS5_contig_306	legumain	3.63425e-158	K01369
SPF_FS5_contig_307	tubulin alpha chain-like	1.01973e-82	K07374
SPF_FS5_contig_308	tubulin alpha chain-like	7.40226e-81	K07374
SPF_FS5_contig_310	40S ribosomal protein S15	1.12248e-58	K02958
SPF_FS5_contig_311	tubulin alpha-1A chain-like	0	K07374
SPF_FS5_contig_312	60S ribosomal protein L8	3.91794e-132	K02938
SPF_FS5_contig_316	catalase	0	K03781
SPF_FS5_contig_317	nuclear receptor subfamily 2 group E member 1	6.16902e-165	K08545
SPF_FS5_contig_318	allene oxide synthase-lipoxygenase protein-like	1.1926e-119	K00461
SPF_FS5_contig_320	glutamyl aminopeptidase-like	1.08387e-35	K11141
SPF_FS5_contig_321	fatty acid-binding protein, muscle	4.59697e-30	K08752
SPF_FS5_contig_323	glycosylated lysosomal membrane protein A-like	2.23769e-56
SPF_FS5_contig_324	ganglioside GM2 activator-like	2.37473e-34	K12383
SPF_FS5_contig_325	cathepsin L1-like	2.75226e-121	K01365
SPF_FS5_contig_326	antistasin-like isoform X2	8.14496e-12
SPF_FS5_contig_327	60S ribosomal protein L26-like	1.24307e-62	K02898
SPF_FS5_contig_329	ubiquitin carboxyl-terminal hydrolase 10 isoform X2	5.25067e-110	K11841
SPF_FS5_contig_330	ATP-dependent RNA helicase SUV3 homolog, mitochondrial	0	K17675
SPF_FS5_contig_332	40S ribosomal protein S27-like	1.41736e-52	K02978
SPF_FS5_contig_333	elongation factor 1-alpha	0	K03231
SPF_FS5_contig_335	adhesion G-protein coupled receptor G7-like	9.2367e-94
SPF_FS5_contig_336	carboxypeptidase B	7.08175e-94	K01298
SPF_FS5_contig_337	UPF0505 protein C16orf62 homolog	0
SPF_FS5_contig_342	28S ribosomal protein S15, mitochondrial	5.42133e-18	K02956
SPF_FS5_contig_344	Cation-dependent mannose-6-phosphate receptor	1.02384e-10
SPF_FS5_contig_345	40S ribosomal protein S18	6.1427e-81	K02964
SPF_FS5_contig_348	eukaryotic translation initiation factor 3 subunit C-like isoform X1	0	K03252
SPF_FS5_contig_350	Serine/threonine-protein kinase pim-3	1.20249e-119	K08807
SPF_FS5_contig_352	cytochrome oxidase subunit I (mitochondrion)	1.46067e-77	K02256
SPF_FS5_contig_353	cytochrome c oxidase subunit I (mitochondrion)	6.58029e-81	K02256
SPF_FS5_contig_354	integrin-linked kinase-associated serine/threonine phosphatase 2C isoform X3	1.94205e-81	K17500
SPF_FS5_contig_355	disco-interacting protein 2 homolog C isoform X3	0
SPF_FS5_contig_356	Surfeit locus protein 4 homolog	8.42677e-96	K20369
SPF_FS5_contig_358	40S ribosomal protein S7	1.12965e-99	K02993
SPF_FS5_contig_360	myosin heavy chain, non-muscle isoform X1	0
SPF_FS5_contig_361	nucleolin-like isoform X3	2.29285e-64	K11294
SPF_FS5_contig_362	60S ribosomal protein L12	5.85694e-81	K02870
SPF_FS5_contig_363	xaa-Pro aminopeptidase 1 isoform X2	0	K01262
SPF_FS5_contig_364	la-related protein CG11505 isoform X2	1.4292e-61	K18763
SPF_FS5_contig_365	pre-mRNA 3' end processing protein WDR33 isoform X1	0	K15542
SPF_FS5_contig_368	V-type proton ATPase subunit D	7.61925e-100	K02149
SPF_FS5_contig_369	aldose reductase isoform X2	9.8823e-107	K00002
SPF_FS5_contig_370	TAR DNA-binding protein 43 isoform X4	3.04969e-117	K23600
SPF_FS5_contig_371	adenylate kinase 9-like isoform X1	0	K18533
SPF_FS5_contig_373	heterogeneous nuclear ribonucleoprotein Q	0	K13161
SPF_FS5_contig_374	guanine nucleotide-binding protein G(o) subunit alpha-like	0	K04640
SPF_FS5_contig_375	eukaryotic translation initiation factor 5	8.83246e-158	K03262
SPF_FS5_contig_377	DDB1- and CUL4-associated factor 7	0	K11805
SPF_FS5_contig_378	tolloid-like protein 1	0	K13046
SPF_FS5_contig_379	ADP-ribosylation factor-like protein 6-interacting protein 1	1.86112e-25
SPF_FS5_contig_380	ferritin	4.34757e-87	K00522
SPF_FS5_contig_381	receptor-type tyrosine-protein phosphatase epsilon isoform X1	1.33831e-171
SPF_FS5_contig_382	ATP synthase subunit gamma, mitochondrial-like	3.74332e-113	K02136
SPF_FS5_contig_384	casein kinase I isoform X5	0	K08957
SPF_FS5_contig_385	peptidase	1.1916e-17
SPF_FS5_contig_386	sodium/glucose cotransporter 4-like	0	K14389
SPF_FS5_contig_387	nuclear factor related to kappa-B-binding protein-like	2.99408e-112	K11671
SPF_FS5_contig_388	probable LRR receptor-like protein kinase At1g51890	2.57025e-18
SPF_FS5_contig_391	myosin heavy chain isoform A	0	K08291
SPF_FS5_contig_393	tRNA (adenine(58)-N(1))-methyltransferase non-catalytic subunit TRM6-like	7.50028e-91	K17751
SPF_FS5_contig_394	calponin-like protein-1	8.97885e-135	K03256
SPF_FS5_contig_400	peptidase	1.40813e-114
SPF_FS5_contig_401	transcription factor MafF	1.16549e-09
SPF_FS5_contig_405	myelin regulatory factor isoform X1	3.68926e-138
SPF_FS5_contig_406	chymotrypsinogen A-like	1.15484e-54
SPF_FS5_contig_407	G protein-activated inward rectifier potassium channel 3-like	3.13842e-158	K05330
SPF_FS5_contig_408	heat shock 70 kDa protein 4-like	0	K09489
SPF_FS5_contig_409	ribosomal protein S6 kinase alpha-1 isoform X4	0	K04373
SPF_FS5_contig_410	Pancreatic triacylglycerol lipase	5.20741e-113	K14074
SPF_FS5_contig_411	ribosomal protein S12	3.41094e-76	K02951
SPF_FS5_contig_412	spermatogenesis-associated protein 20	0
SPF_FS5_contig_413	cysteine dioxygenase type 1-like	9.11821e-92	K00456
SPF_FS5_contig_415	putative pre-mRNA-splicing factor ATP-dependent RNA helicase PRP1	0	K12820
SPF_FS5_contig_417	LETM1 and EF-hand domain-containing protein 1, mitochondrial-like isoform X2	1.18662e-136	K17800
SPF_FS5_contig_420	dihydrolipoyl dehydrogenase, mitochondrial	0	K00382
SPF_FS5_contig_422	40S ribosomal protein S25-like	3.33987e-39	K02975
SPF_FS5_contig_424	cysteine--tRNA ligase, cytoplasmic-like	0	K01883
SPF_FS5_contig_425	putative ammonium transporter 1	1.42227e-95	K03320
SPF_FS5_contig_426	putative ammonium transporter 1	8.97078e-35	K03320
SPF_FS5_contig_428	tyrosine-protein phosphatase 99A-like isoform X1	0	K16667
SPF_FS5_contig_429	pre-mRNA-splicing factor CWC22 homolog	5.08108e-89	K13100
SPF_FS5_contig_430	cathepsin L1-like	1.23361e-45	K01365
SPF_FS5_contig_432	bone morphogenetic protein 1	5.67455e-37	K14616
SPF_FS5_contig_433	protein transport protein Sec24C-like isoform X1	0	K14007
SPF_FS5_contig_434	SNF-related serine/threonine-protein kinase	7.98707e-176	K08802
SPF_FS5_contig_436	40S ribosomal protein S24-like isoform X2	7.52676e-55	K02974
SPF_FS5_contig_437	DNA/RNA-binding protein KIN17	8.62105e-169	K13102
SPF_FS5_contig_438	dihydrolipoyllysine-residue acetyltransferase component of pyruvate dehydrogenase complex, mitochondrial isoform X1	6.93281e-46	K00627
SPF_FS5_contig_439	cytochrome b (mitochondrion)	2.14379e-133	K00412
SPF_FS5_contig_441	centrosomal protein of 290 kDa-like	0
SPF_FS5_contig_442	NF-kappa-B essential modulator isoform X1	5.2248e-10
SPF_FS5_contig_443	chromobox protein homolog 1-like	1.0987e-62	K11585
SPF_FS5_contig_447	muscle-specific protein 20	4.10851e-40	K20526
SPF_FS5_contig_448	macrophage mannose receptor 1-like	0	K06560
SPF_FS5_contig_450	C-terminal-binding protein-like isoform X1	0	K04496
SPF_FS5_contig_451	son of sevenless homolog 2-like	0	K03099
SPF_FS5_contig_452	BPTI/Kunitz domain-containing protein 4-like	2.70266e-19
SPF_FS5_contig_453	glucosamine-6-phosphate isomerase 1	8.26642e-151	K02564
SPF_FS5_contig_454	sodium/hydrogen exchanger 7 isoform X5	4.07739e-145	K12041
SPF_FS5_contig_456	cyclin-dependent kinase 8 isoform X2	0	K02208
SPF_FS5_contig_457	radial spoke head protein 4 homolog A isoform X1	0	K19756
SPF_FS5_contig_459	glycogen synthase kinase-3 beta	0	K03083
SPF_FS5_contig_460	cathepsin L	2.59642e-46	K01365
SPF_FS5_contig_461	junctophilin-1-like isoform X1	1.39699e-111	K19530
SPF_FS5_contig_462	serine protease hepsin	9.95954e-131	K20111
SPF_FS5_contig_463	ras-related protein Rab-2	3.9756e-133	K07877
SPF_FS5_contig_464	spectrin beta chain isoform X1	0	K06115
SPF_FS5_contig_467	predicted protein	1.24038e-16	K12382
SPF_FS5_contig_468	Golgi-associated plant pathogenesis-related protein 1	5.87262e-34
SPF_FS5_contig_469	ubiquitin carboxyl-terminal hydrolase 7-like	0
SPF_FS5_contig_470	MAP kinase-interacting serine/threonine-protein kinase 1-like	6.14866e-135	K04372
SPF_FS5_contig_471	EF-hand domain-containing protein D1	2.16718e-84
SPF_FS5_contig_475	serine/threonine-protein kinase PINK1, mitochondrial	1.63789e-33	K05688
SPF_FS5_contig_476	cytochrome P450 3A6-like	2.70158e-109
SPF_FS5_contig_477	phosphorylated adapter RNA export protein	3.90796e-18	K14291
SPF_FS5_contig_479	4-aminobutyrate aminotransferase, mitochondrial-like	1.59476e-103	K13524
SPF_FS5_contig_484	60S acidic ribosomal protein P2-like	6.00354e-23	K02943
SPF_FS5_contig_485	tryptophan 2,3-dioxygenase-like isoform X1	5.18531e-131	K00453
SPF_FS5_contig_486	putative phospholipase B-like 2	0
SPF_FS5_contig_487	cytosolic 5'-nucleotidase 3A isoform X1	2.30091e-25	K01081
SPF_FS5_contig_488	fibrinolytic enzyme, isozyme C-like	1.18682e-111	K20111
SPF_FS5_contig_489	E3 ubiquitin-protein ligase LRSAM1 isoform X1	1.03431e-16	K10641
SPF_FS5_contig_491	lactose-binding lectin l-2-like	2.40715e-50	K06560
SPF_FS5_contig_492	single-stranded DNA-binding protein 3-like isoform X2	1.05425e-59
SPF_FS5_contig_493	reticulon-4-interacting protein 1, mitochondrial isoform X2	3.89122e-45	K23164
SPF_FS5_contig_494	heterogeneous nuclear ribonucleoprotein K-like isoform X13	1.94954e-89	K12886
SPF_FS5_contig_495	40S ribosomal protein S17-like	4.18655e-76	K02962
SPF_FS5_contig_496	heat shock factor-binding protein 1-like	5.2255e-32	K19765
SPF_FS5_contig_497	polycystic kidney disease protein 1-like 2	0
SPF_FS5_contig_498	cytochrome c oxidase subunit 7C, mitochondrial-like	3.08869e-19	K02272
SPF_FS5_contig_499	predicted protein	2.25375e-17	K12382
SPF_FS5_contig_500	ATP-dependent Clp protease ATP-binding subunit clpX-like, mitochondrial	0	K03544
SPF_FS5_contig_501	large subunit ribosomal protein 23	7.61977e-75	K02894
SPF_FS5_contig_502	solute carrier family 12 member 4-like isoform X1	0	K14427
SPF_FS5_contig_503	ATP-binding cassette sub-family G member 1-like isoform X1	0	K05679
SPF_FS5_contig_507	DNA damage-regulated autophagy modulator protein 2	2.393e-78	K21956
SPF_FS5_contig_508	casein kinase II subunit alpha isoform X1	0	K03097
SPF_FS5_contig_509	C-myc promoter-binding protein-like isoform X1	0	K20163
SPF_FS5_contig_510	protein SSUH2 homolog	1.49567e-96
SPF_FS5_contig_512	CD63 antigen	7.83209e-29	K06497
SPF_FS5_contig_514	Serine/threonine-protein kinase PAK mbt	8.21864e-113	K05734
SPF_FS5_contig_517	peptidase M4 family protein	1.78952e-94
SPF_FS5_contig_520	enoyl-CoA delta isomerase 2, mitochondrial isoform X1	1.57444e-154	K13239
SPF_FS5_contig_523	Microsomal glutathione S-transferase 3	5.28345e-46	K00799
SPF_FS5_contig_525	CYP2D50	4.6478e-88	K00512
SPF_FS5_contig_526	dihydropteridine reductase	5.98512e-67	K00357
SPF_FS5_contig_527	glucose-6-phosphate exchanger SLC37A2-like isoform X3	2.12137e-140	K13783
SPF_FS5_contig_528	Post-GPI attachment to proteins factor 2	9.22608e-44	K23552
SPF_FS5_contig_529	protein MON2 homolog isoform X1	0
SPF_FS5_contig_530	acyl-CoA dehydrogenase family member 10 isoform X1	0	K11729
SPF_FS5_contig_531	cytochrome b (mitochondrion)	1.06731e-84	K00412
SPF_FS5_contig_532	40S ribosomal protein S8	2.12014e-116	K02995
SPF_FS5_contig_533	DBH-like monooxygenase protein 1	1.07042e-119
SPF_FS5_contig_535	DBH-like monooxygenase protein 1	3.17602e-99	K00503
SPF_FS5_contig_536	F-box only protein 15	2.05542e-31	K10298
SPF_FS5_contig_537	methylthioribulose-1-phosphate dehydratase	1.6649e-125	K08964
SPF_FS5_contig_539	thioredoxin reductase 1, cytoplasmic-like	0	K22182
SPF_FS5_contig_540	Mitochondrial calcium uniporter regulator 1	3.42948e-40	K22137
SPF_FS5_contig_542	forkhead box protein N3 isoform X1	1.77937e-58	K09407
SPF_FS5_contig_543	probable phospholipid-transporting ATPase IF isoform X8	0	K01530
SPF_FS5_contig_544	paired box protein Pax-6-like isoform X1	6.58799e-138	K08031
SPF_FS5_contig_551	receptor-type tyrosine-protein phosphatase F-like isoform X1	1.34198e-31	K05695
SPF_FS5_contig_552	pancreatic alpha-amylase-like	6.45943e-104	K01176
SPF_FS5_contig_554	asparagine--tRNA ligase, cytoplasmic	0	K01893
SPF_FS5_contig_556	tubulin alpha-3 chain-like	1.01953e-163	K07374
SPF_FS5_contig_557	bifunctional 3'-phosphoadenosine 5'-phosphosulfate synthase isoform X2	0	K13811
SPF_FS5_contig_558	cilia- and flagella-associated protein 65-like	0
SPF_FS5_contig_559	Tubulin alpha-1A chain	2.53995e-143	K07374
SPF_FS5_contig_560	membrane-spanning 4-domains subfamily A member 4A isoform X3	8.66516e-06
SPF_FS5_contig_561	membrane-spanning 4-domains subfamily A member 8	7.36061e-06
SPF_FS5_contig_562	beta-1,3-glucan-binding protein-like	2.63231e-105
SPF_FS5_contig_563	ras-related protein Rab-5B-like	1.63416e-125	K07888
SPF_FS5_contig_566	vacuolar protein sorting-associated protein 29	1.45119e-112	K18467
SPF_FS5_contig_567	protein arginine N-methyltransferase 1 isoform X1	0	K11434
SPF_FS5_contig_569	nuclear receptor	4.51756e-31	K08547
SPF_FS5_contig_571	zinc finger protein 678-like	2.09508e-85	K09228
SPF_FS5_contig_572	zinc finger protein 208-like	2.10791e-104	K09228
SPF_FS5_contig_573	adenosine kinase 1	2.47814e-149	K00856
SPF_FS5_contig_574	Fas-associated death domain protein	4.08074e-23	K02373
SPF_FS5_contig_576	cyclin-dependent kinase-like 1 isoform X4	0	K08824
SPF_FS5_contig_577	transient receptor potential cation channel subfamily A member 1-like	2.1302e-52	K04984
SPF_FS5_contig_578	collagen alpha-1(II) chain	1.23449e-46	K19719
SPF_FS5_contig_579	enoyl-CoA hydratase, mitochondrial	7.45875e-138	K07511
SPF_FS5_contig_581	Transposable element Tc1 transposase	1.22398e-27
SPF_FS5_contig_587	60S ribosomal protein L13	1.00091e-77	K02873
SPF_FS5_contig_588	DNA-binding protein HEXBP-like isoform X2	7.08221e-27	K09250
SPF_FS5_contig_589	heat shock protein 70	7.37512e-50	K03283
SPF_FS5_contig_590	hippocampus abundant transcript 1 protein-like	0
SPF_FS5_contig_591	sodium- and chloride-dependent glycine transporter 1-like	2.12605e-171	K05038
SPF_FS5_contig_592	pre-rRNA-processing protein TSR2 homolog	2.04446e-30	K14800
SPF_FS5_contig_595	vesicle-fusing ATPase 1	0	K06027
SPF_FS5_contig_596	microtubule-associated protein futsch	7.52426e-17	K10429
SPF_FS5_contig_597	V-type proton ATPase 16 kDa proteolipid subunit	4.06987e-66	K02155
SPF_FS5_contig_599	phosphoenolpyruvate carboxykinase, cytosolic [GTP]-like isoform X3	0	K01596
SPF_FS5_contig_600	serine hydroxymethyltransferase, mitochondrial	0	K00600
SPF_FS5_contig_601	isocitrate dehydrogenase	0	K00031
SPF_FS5_contig_602	vascular endothelial growth factor A-like isoform X2	1.09151e-20	K05449
SPF_FS5_contig_603	Serine/threonine-protein kinase PAK 3	3.33867e-143	K04409
SPF_FS5_contig_604	40S ribosomal protein S15Aa	5.60338e-77	K02957
SPF_FS5_contig_605	beta-1,3-glucan-binding protein-like isoform X1	3.30314e-148
SPF_FS5_contig_606	dynein heavy chain 1, axonemal-like isoform X6	0	K10408
SPF_FS5_contig_609	ATP-binding cassette sub-family A member 1 isoform X1	0	K05642
SPF_FS5_contig_610	60S ribosomal protein L36	1.0841e-38	K02920
SPF_FS5_contig_613	probable pectate lyase 4	9.66202e-44
SPF_FS5_contig_614	calcyphosin-like protein	7.31582e-94
SPF_FS5_contig_615	probable global transcription activator SNF2L2	0
SPF_FS5_contig_616	elongation factor 1-gamma	2.01955e-167	K03233
SPF_FS5_contig_617	exportin-1-like	0	K14290
SPF_FS5_contig_618	60S ribosomal protein L10a	2.99542e-111	K02865
SPF_FS5_contig_619	receptor-type guanylate cyclase gcy-4-like isoform X1	0
SPF_FS5_contig_621	protein SET-like	3.62123e-115	K11290
SPF_FS5_contig_624	serine/arginine-rich splicing factor 6-like isoform X1	5.08933e-66	K12893
SPF_FS5_contig_627	proline-rich AKT1 substrate 1-like	5.153e-10
SPF_FS5_contig_630	interleukin-1 receptor-associated kinase 4 isoform X1	1.63368e-72
SPF_FS5_contig_631	anoctamin-4-like isoform X2	0	K19499
SPF_FS5_contig_632	V-type proton ATPase 116 kDa subunit a-like isoform X2	0	K02154
SPF_FS5_contig_633	beta-hexosaminidase subunit alpha-like isoform X2	0	K12373
SPF_FS5_contig_634	beta-adrenergic receptor kinase 2-like isoform X2	0	K00910
SPF_FS5_contig_636	myoferlin-like isoform X7	0	K22125
SPF_FS5_contig_637	transmembrane channel-like protein 5	1.66275e-102	K21988
SPF_FS5_contig_640	ADP,ATP carrier protein 3, mitochondrial-like	1.87041e-166	K05863
SPF_FS5_contig_643	protein transport protein Sec23A isoform X2	0	K14006
SPF_FS5_contig_644	Lysosome-associated membrane glycoprotein 1	3.9445e-18	K06528
SPF_FS5_contig_648	serine/threonine-protein phosphatase 4 regulatory subunit 2-A-like	5.62171e-51	K15425
SPF_FS5_contig_649	probable pyruvate dehydrogenase E1 component subunit alpha, mitochondrial	0	K00161
SPF_FS5_contig_651	probable pyruvate dehydrogenase E1 component subunit alpha, mitochondrial	1.2806e-125	K00161
SPF_FS5_contig_652	60S ribosomal protein L5	1.84183e-151	K02932
SPF_FS5_contig_654	ornithine decarboxylase-like	3.8259e-117	K01581
SPF_FS5_contig_656	coatomer subunit beta'-like isoform X1	0	K17302
SPF_FS5_contig_657	5-methylcytosine rRNA methyltransferase NSUN4	2.20069e-55	K21970
SPF_FS5_contig_658	bis(5'-adenosyl)-triphosphatase ENPP4 isoform X1	1.1445e-66	K18398
SPF_FS5_contig_659	Serine/threonine-protein phosphatase 2A 65 kDa regulatory subunit A alpha isoform	0	K03456
SPF_FS5_contig_660	E3 ubiquitin-protein ligase rnf213-alpha-like isoform X1	0	K22754
SPF_FS5_contig_661	synapse differentiation-inducing gene protein 1-like	5.62256e-10
SPF_FS5_contig_664	kinesin-like protein KIF28P	0
SPF_FS5_contig_665	Transposon Tf2-6 polyprotein	0
SPF_FS5_contig_666	elongation factor 2	0	K03234
SPF_FS5_contig_667	V-type proton ATPase subunit S1-like	9.1583e-37	K03662
SPF_FS5_contig_670	lysosomal acid phosphatase	6.3765e-103	K14410
SPF_FS5_contig_671	cell cycle control protein 50A	8.34067e-133
SPF_FS5_contig_672	syntaxin-5-like	1.18873e-124	K08490
SPF_FS5_contig_675	retinoid X receptor	0	K08524
SPF_FS5_contig_677	myotubularin-related protein 14 isoform X1	1.11568e-143	K18086
SPF_FS5_contig_678	Cubilin	0	K14616
SPF_FS5_contig_681	defensin	1.52701e-11
SPF_FS5_contig_682	multifunctional protein ADE2-like	9.64511e-53	K01587
SPF_FS5_contig_683	putative ferric-chelate reductase 1 isoform X1	1.11821e-45
SPF_FS5_contig_685	gelsolin-like protein 2	1.26493e-143	K05768
SPF_FS5_contig_687	DNA-directed RNA polymerases I, II, and III subunit RPABC3	2.83551e-80	K03016
SPF_FS5_contig_688	ATP-binding cassette sub-family D member 4	1.23191e-126	K05678
SPF_FS5_contig_689	organic solute transporter subunit alpha-like	7.50671e-45	K14360
SPF_FS5_contig_690	Nascent polypeptide-associated complex subunit alpha	1.03038e-75	K03626
SPF_FS5_contig_691	Transcription initiation factor TFIID subunit 2	0	K03128
SPF_FS5_contig_695	multidrug resistance-associated protein 4-like	1.63282e-171	K05673
SPF_FS5_contig_696	probable maltase isoform X1	7.6834e-120	K14210
SPF_FS5_contig_698	peroxidase-like isoform X1	1.83782e-136	K19511
SPF_FS5_contig_699	valine--tRNA ligase	0	K01873
SPF_FS5_contig_701	ATP-binding cassette sub-family G member 2	0	K05681
SPF_FS5_contig_703	cleavage and polyadenylation specificity factor subunit 2	0	K14402
SPF_FS5_contig_704	arachidonate 5-lipoxygenase	8.16024e-25	K00461
SPF_FS5_contig_705	high mobility group protein B3-like	1.19035e-35	K11295
SPF_FS5_contig_706	microtubule-associated protein futsch-like isoform X2	2.31157e-107	K10429
SPF_FS5_contig_707	aldo/keto reductase	5.8245e-26
SPF_FS5_contig_709	phenylalanine-4-hydroxylase isoform X2	1.63719e-36	K00500
SPF_FS5_contig_711	phenylalanine-4-hydroxylase isoform X1	2.15978e-77	K00500
SPF_FS5_contig_713	Uridine phosphorylase 2	8.51182e-13	K00757
SPF_FS5_contig_714	transcription initiation factor TFIID subunit 5	0	K03130
SPF_FS5_contig_717	mitochondrial-processing peptidase subunit beta	0	K17732
SPF_FS5_contig_718	heat shock 70 kDa protein 14	3.36119e-133	K03283
SPF_FS5_contig_719	acyloxyacyl hydrolase-like	0	K01065
SPF_FS5_contig_720	Soma ferritin	4.4463e-22	K00522
SPF_FS5_contig_721	mitochondrial-processing peptidase subunit beta	1.38291e-112	K17732
SPF_FS5_contig_723	XChain X, E2~ubiquitin-Hect	1.11377e-37	K02977
SPF_FS5_contig_724	pleckstrin homology domain-containing family F member 2-like	4.28275e-117
SPF_FS5_contig_725	eukaryotic peptide chain release factor subunit 1 isoform X1	0	K03265
SPF_FS5_contig_727	60S acidic ribosomal protein P0	9.05692e-131	K02941
SPF_FS5_contig_730	fragile X mental retardation syndrome-related protein 1 isoform X5	2.04952e-92	K15516
SPF_FS5_contig_731	ESF1 homolog isoform X1	4.44965e-102
SPF_FS5_contig_732	arylsulfatase B-like	0	K01135
SPF_FS5_contig_734	TOM1-like protein 2 isoform X3	1.66443e-123
SPF_FS5_contig_739	soma ferritin-like	1.26524e-55	K00522
SPF_FS5_contig_741	translation elongation factor 2	0	K03234
SPF_FS5_contig_742	calcium-transporting ATPase sarcoplasmic/endoplasmic reticulum type isoform X4	0	K05853
SPF_FS5_contig_743	sodium/hydrogen exchanger 3-like isoform X1	0	K12040
SPF_FS5_contig_744	proteasome-associated protein ECM29 homolog	0	K11886
SPF_FS5_contig_745	blastula protease 10-like	2.63922e-30	K09608
SPF_FS5_contig_746	galectin 4-like protein transcript variant	5.68895e-63	K10091
SPF_FS5_contig_747	Bax inhibitor 1	7.63605e-76	K21889
SPF_FS5_contig_748	60S ribosomal protein L4	0	K02930
SPF_FS5_contig_749	60S ribosomal protein L27	1.75568e-70	K02901
SPF_FS5_contig_751	ATP-binding cassette sub-family E member 1-like	0	K06174
SPF_FS5_contig_752	SEC23-interacting protein	6.36252e-58
SPF_FS5_contig_753	trans-1,2-dihydrobenzene-1,2-diol dehydrogenase-like	9.58156e-107	K00078
SPF_FS5_contig_756	WD repeat domain phosphoinositide-interacting protein 3-like	2.52774e-118	K22991
SPF_FS5_contig_757	40S ribosomal protein S11	6.27651e-85	K02949
SPF_FS5_contig_759	erythrocyte band 7 integral membrane protein-like	1.03744e-92	K17286
SPF_FS5_contig_760	RNA-binding protein 12	1.55828e-32
SPF_FS5_contig_761	gastrula zinc finger protein XlCGF49.1-like	5.60621e-36	K09228
SPF_FS5_contig_762	zinc finger protein 239-like	8.06599e-65	K09228
SPF_FS5_contig_763	translationally-controlled tumor protein	9.00456e-107	K01115
SPF_FS5_contig_765	alpha-actinin, sarcomeric-like isoform X1	0	K05699
SPF_FS5_contig_766	Fatty aldehyde dehydrogenase	9.45689e-46	K00128
SPF_FS5_contig_767	dynein heavy chain 2, axonemal-like	0	K10408
SPF_FS5_contig_768	U3 small nucleolar RNA-associated protein 15 homolog	0	K14549
SPF_FS5_contig_769	engulfment and cell motility protein 1	0	K12366
SPF_FS5_contig_771	piRNA biogenesis protein EXD1-like	1.18917e-47	K18740
SPF_FS5_contig_772	voltage-dependent anion-selective channel protein 2	3.43028e-142	K15040
SPF_FS5_contig_774	tyrosine-protein kinase CSK	3.30976e-135	K05728
SPF_FS5_contig_775	DNA polymerase zeta catalytic subunit	0	K02350
SPF_FS5_contig_776	unconventional myosin-Va isoform X1	0	K10357
SPF_FS5_contig_778	Retrovirus-related Pol polyprotein from transposon 297	4.031e-50
SPF_FS5_contig_780	hypothetical protein LOTGIDRAFT_162340	4.21743e-17
SPF_FS5_contig_781	low choriolytic enzyme-like	1.12087e-28
SPF_FS5_contig_785	cytosolic purine 5'-nucleotidase isoform X3	3.51755e-165	K01081
SPF_FS5_contig_786	28S ribosomal protein S9, mitochondrial-like	1.15173e-101	K19907
SPF_FS5_contig_787	neuroglian isoform X1	0	K06756
SPF_FS5_contig_788	troponin C	3.14548e-37	K02183
SPF_FS5_contig_790	tropomodulin-like isoform X2	2.54163e-122	K10370
SPF_FS5_contig_792	predicted protein	5.85505e-12	K12382
SPF_FS5_contig_794	hypoxia-inducible factor 1 alpha	2.16783e-74	K08268
SPF_FS5_contig_795	Protein YIPF3	2.42748e-72	K22941
SPF_FS5_contig_796	dihydropyrimidinase isoform X6	0	K01464
SPF_FS5_contig_797	serine/threonine-protein kinase tousled-like 2 isoform X2	0	K08864
SPF_FS5_contig_798	far upstream element-binding protein 3	2.05553e-98	K13210
SPF_FS5_contig_799	multidrug resistance protein 1-like isoform X1	0	K05658
SPF_FS5_contig_800	60S ribosomal protein L11	1.15116e-108	K02868
SPF_FS5_contig_801	GTP-binding protein 2-like	0
SPF_FS5_contig_802	protein transport protein Sec61 subunit alpha	0	K10956
SPF_FS5_contig_803	alkaline phosphatase family protein	8.45533e-16	K18398
SPF_FS5_contig_804	ectonucleotide pyrophosphatase/phosphodiesterase family member 5	1.24709e-111	K18398
SPF_FS5_contig_805	ectonucleotide pyrophosphatase/phosphodiesterase family member 5	1.10619e-52	K18398
SPF_FS5_contig_806	glycoprotein 3-alpha-L-fucosyltransferase A-like	7.53816e-51	K00753
SPF_FS5_contig_808	cytochrome P450 2U1	1.24766e-52	K00512
SPF_FS5_contig_809	cytochrome P450 2J2-like	3.68449e-71	K00512
SPF_FS5_contig_811	Bifunctional arginine demethylase and lysyl-hydroxylase JMJD6	0	K11323
SPF_FS5_contig_816	solute carrier family 26 member 6-like	1.18258e-35	K14453
SPF_FS5_contig_817	solute carrier family 26 member 6 isoform X2	3.96002e-32	K14453
SPF_FS5_contig_818	ubiquitin-conjugating enzyme E2 N	5.00354e-93	K10580
SPF_FS5_contig_819	sodium/potassium-transporting ATPase subunit beta-like	1.99009e-43	K01540
SPF_FS5_contig_820	sodium/potassium-transporting ATPase subunit alpha-like	0
SPF_FS5_contig_821	membrane-spanning 4-domains subfamily A member 8	9.93926e-13
SPF_FS5_contig_827	ly6/PLAUR domain-containing protein 1-like	4.46649e-10
SPF_FS5_contig_830	ATP-binding cassette sub-family A member 7-like isoform X1	1.49834e-06	K05641
SPF_FS5_contig_832	GTP-binding protein 1	0
SPF_FS5_contig_833	E3 ubiquitin-protein ligase UBR4 isoform X2	0	K10691
SPF_FS5_contig_836	cytochrome c oxidase subunit 1 (mitochondrion)	4.24339e-90	K02256
SPF_FS5_contig_837	MOXD1 homolog 1	1.91381e-28	K00503
SPF_FS5_contig_838	type-1 angiotensin II receptor-associated protein-like	3.00726e-32
SPF_FS5_contig_839	aconitate hydratase, mitochondrial-like	1.17543e-87	K01681
SPF_FS5_contig_841	glutathione S-transferase 4-like	3.82797e-28	K04097
SPF_FS5_contig_842	filamin-A-like isoform X1	0	K04437
SPF_FS5_contig_843	peptidyl-glycine alpha-amidating monooxygenase B-like	0	K24006
SPF_FS5_contig_845	40S ribosomal protein S23	2.66673e-90	K02973
SPF_FS5_contig_847	deoxyuridine 5'-triphosphate nucleotidohydrolase-like	1.32563e-60	K01520
SPF_FS5_contig_848	omega-amidase NIT2	1.12502e-77	K13566
SPF_FS5_contig_849	omega-amidase NIT2	1.42587e-36	K13566
SPF_FS5_contig_850	protein-L-isoaspartate O-methyltransferase domain-containing protein 2	5.68122e-104
SPF_FS5_contig_851	60S ribosomal protein L13a	1.31925e-57	K02872
SPF_FS5_contig_852	lactase-phlorizin hydrolase	7.89852e-170
SPF_FS5_contig_853	60S ribosomal protein L10	5.58712e-124	K02866
SPF_FS5_contig_857	geraniol dehydrogenase 1 isoform X2	3.39903e-88
SPF_FS5_contig_858	cytochrome P450 3A6-like	6.5039e-117
SPF_FS5_contig_859	ATP-dependent RNA helicase DDX3X isoform X5	0	K11594
SPF_FS5_contig_860	serine/arginine-rich splicing factor 1B	1.0855e-74	K12890
SPF_FS5_contig_861	60S ribosomal protein L13a-like	1.48888e-68	K02872
SPF_FS5_contig_863	lethal(2) giant larvae protein homolog 1-like	0	K06094
SPF_FS5_contig_871	14-3-3 protein zeta isoform X1	1.63206e-107	K16197
SPF_FS5_contig_872	EF-hand domain-containing family member C2-like	0
SPF_FS5_contig_873	NEDD8-activating enzyme E1 regulatory subunit-like	0	K04532
SPF_FS5_contig_874	nucleolysin TIAR-like isoform X1	2.34353e-108	K13201
SPF_FS5_contig_875	phosphoenolpyruvate carboxykinase, cytosolic [GTP]	0	K01596
SPF_FS5_contig_876	E3 ubiquitin-protein ligase Bre1-like isoform X6	0	K10696
SPF_FS5_contig_879	peroxisomal membrane protein 11C isoform X1	1.36702e-40	K13353
SPF_FS5_contig_881	RNA-binding protein lark	6.19092e-40	K13187
SPF_FS5_contig_882	myosin heavy chain	0	K17751
SPF_FS5_contig_883	suppressor of tumorigenicity 14 protein homolog	1.48578e-108	K01362
SPF_FS5_contig_886	atlastin-2 isoform X1	1.29683e-98	K17339
SPF_FS5_contig_890	ADP-ribosylarginine hydrolase	5.96849e-112	K01245
SPF_FS5_contig_891	unconventional myosin-Id	0	K10356
SPF_FS5_contig_893	myosin heavy chain isoform A	0	K17751
SPF_FS5_contig_896	histidine protein methyltransferase 1 homolog	1.06555e-63
SPF_FS5_contig_898	receptor-interacting serine/threonine-protein kinase 3 isoform X1	2.70837e-35	K04424
SPF_FS5_contig_899	EF-hand domain-containing protein D1	1.11557e-86
SPF_FS5_contig_900	ribonucleoside-diphosphate reductase large subunit	0	K10807
SPF_FS5_contig_904	acid phosphatase type 7	7.94879e-168	K22390
SPF_FS5_contig_905	ankyrin repeat domain-containing protein 12	6.86124e-137
SPF_FS5_contig_906	AChain A, Solution structure of the fourth CH domain from human L-plastin	6.8694e-33	K17336
SPF_FS5_contig_907	gamma-aminobutyric acid receptor-associated protein	4.78881e-75	K08341
SPF_FS5_contig_908	TBC1 domain family member 10A-like	5.45742e-140	K19944
SPF_FS5_contig_910	ribosomal protein rpl17	8.11513e-95	K02880
SPF_FS5_contig_911	ubiquitin-like modifier-activating enzyme 1	0	K03178
SPF_FS5_contig_912	Phosphatidylinositol 3-kinase catalytic subunit type 3	0	K00914
SPF_FS5_contig_913	transcription factor CP2-like	0	K09275
SPF_FS5_contig_914	adenosylhomocysteinase A	0	K01251
SPF_FS5_contig_915	DBH-like monooxygenase protein 1	2.03217e-122
SPF_FS5_contig_916	DBH-like monooxygenase protein 1	8.88184e-120
SPF_FS5_contig_917	pre-mRNA-processing-splicing factor 8	0
SPF_FS5_contig_918	60S ribosomal protein L3	0	K02925
SPF_FS5_contig_919	uncharacterized protein LOC106172419 isoform X1	1.92658e-32
SPF_FS5_contig_920	forkhead box protein O-like	1.01506e-82	K09408
SPF_FS5_contig_922	Dolichyl-diphosphooligosaccharide--protein glycosyltransferase 48 kDa subunit	0	K12670
SPF_FS5_contig_923	alpha-actinin, sarcomeric-like isoform X2	0	K05699
SPF_FS5_contig_924	microtubule-actin cross-linking factor 1-like isoform X3	0	K10382
SPF_FS5_contig_925	microtubule-actin cross-linking factor 1, isoforms 1/2/3/5-like	3.05048e-62	K10382
SPF_FS5_contig_927	ER membrane protein complex subunit 1-like isoform X2	0	K23562
SPF_FS5_contig_928	MAM and LDL-receptor class A domain-containing protein 1	3.61905e-13	K20053
SPF_FS5_contig_931	retrovirus-related pol polyprotein from transposon tnt 1-94	6.07037e-126
SPF_FS5_contig_932	epsin-2 isoform X2	1.42409e-94	K12471
SPF_FS5_contig_935	cyclin-related protein FAM58A-like	6.06602e-58	K23964
SPF_FS5_contig_936	carnitine O-palmitoyltransferase 1, liver isoform isoform X2	0	K08765
SPF_FS5_contig_937	dolichyl-phosphate beta-glucosyltransferase-like	6.49846e-132	K00729
SPF_FS5_contig_938	syntenin-1-like	6.48108e-119	K17254
SPF_FS5_contig_939	Apoptosis-inducing factor 1	1.41832e-114	K04727
SPF_FS5_contig_945	major facilitator superfamily domain-containing protein 1-like	0
SPF_FS5_contig_946	LOW QUALITY PROTEIN: uncharacterized protein LOC111133782	0
SPF_FS5_contig_947	solute carrier family 35 member E3	3.04098e-116	K15285
SPF_FS5_contig_948	estrogen sulfotransferase	2.1936e-49	K01025
SPF_FS5_contig_949	ras-related and estrogen-regulated growth inhibitor isoform X1	6.57813e-53	K07855
SPF_FS5_contig_950	collagen-like surface protein	4.83837e-30	K06237
SPF_FS5_contig_951	chorion peroxidase-like	8.47672e-103	K19511
SPF_FS5_contig_952	eukaryotic translation initiation factor 5A	5.96761e-74	K03263
SPF_FS5_contig_953	Cathepsin L	1.04106e-62	K01365
SPF_FS5_contig_954	carboxypeptidase B-like	3.26914e-127	K01298
SPF_FS5_contig_955	DNA-binding protein D-ETS-4	1.8304e-51	K09442
SPF_FS5_contig_956	alpha-N-acetylgalactosaminidase isoform X1	1.8815e-123	K01204
SPF_FS5_contig_958	granulins-like isoform X4	5.75929e-69	K23879
SPF_FS5_contig_959	multidrug resistance-associated protein 5-like	3.17116e-93	K05668
SPF_FS5_contig_961	serum paraoxonase/arylesterase 2	7.48937e-25	K01045
SPF_FS5_contig_962	putative cystatin	2.3074e-34	K13899
SPF_FS5_contig_963	60S ribosomal protein L13a-like	1.22553e-69	K02872
SPF_FS5_contig_967	selenoprotein K-like	4.97442e-10
SPF_FS5_contig_968	probable helicase with zinc finger domain isoform X2	0
SPF_FS5_contig_970	manganese-transporting ATPase 13A1-like	0	K14950
SPF_FS5_contig_971	probable 28S ribosomal protein S25, mitochondrial	5.57198e-59	K17404
SPF_FS5_contig_974	general transcription factor IIH subunit 1-like	0	K03141
SPF_FS5_contig_976	3-hydroxyacyl-CoA dehydrogenase type-2-like	8.20848e-137	K08683
SPF_FS5_contig_977	dipeptidase 1-like	2.13739e-167	K01273
SPF_FS5_contig_982	peroxidase-like protein	2.87434e-18	K19511
SPF_FS5_contig_983	chorion peroxidase-like isoform X1	5.97449e-90	K19511
SPF_FS5_contig_984	atlastin-2-like isoform X1	0	K17339
SPF_FS5_contig_985	serine/threonine-protein kinase VRK1-like	7.62701e-124	K08816
SPF_FS5_contig_986	protein crumbs-like	5.44527e-09	K16681
SPF_FS5_contig_988	apolipoprotein D-like	9.07203e-09
SPF_FS5_contig_989	MAP kinase-activating death domain protein-like	2.7385e-158
SPF_FS5_contig_991	vesicle-trafficking protein SEC22b	2.34831e-97	K08517
SPF_FS5_contig_992	pancreatic triacylglycerol lipase-like	7.83465e-117	K14075
SPF_FS5_contig_995	nodal modulator 1-like	0
SPF_FS5_contig_996	cathepsin L	9.9202e-28	K01365
SPF_FS5_contig_997	BCL2/adenovirus E1B 19 kDa protein-interacting protein 3-like	1.83253e-15	K15464
SPF_FS5_contig_999	rho guanine nucleotide exchange factor 10	1.50396e-117	K16727
SPF_FS5_contig_1000	S-adenosylhomocysteine hydrolase-like protein 1 isoform X5	0	K01251
SPF_FS5_contig_1001	cilia- and flagella-associated protein 74-like	0
SPF_FS5_contig_1003	ENSANGG00000017398 protein	1.19225e-90	K03283
SPF_FS5_contig_1004	mirror-image polydactyly gene 1 protein isoform X6	6.19709e-40
SPF_FS5_contig_1007	neuroendocrine convertase 2	0	K01360
SPF_FS5_contig_1008	tubulin beta-4B chain	0	K07375
SPF_FS5_contig_1009	tubulin beta chain isoform X1	6.96043e-109	K07375
SPF_FS5_contig_1011	myelin regulatory factor	2.60704e-113
SPF_FS5_contig_1013	Brain protein I3	7.48827e-11
SPF_FS5_contig_1016	40S ribosomal protein S29	2.72422e-28	K02980
SPF_FS5_contig_1018	telomerase protein component 1-like	0	K11127
SPF_FS5_contig_1019	CD109 antigen	1.39372e-146	K06530
SPF_FS5_contig_1020	small integral membrane protein 4	4.19289e-19
SPF_FS5_contig_1022	60S ribosomal protein L6	9.19043e-98	K02934
SPF_FS5_contig_1023	ADP-ribosylation factor 4	3.52088e-112	K07939
SPF_FS5_contig_1024	sex peptide receptor-like	4.19123e-43
SPF_FS5_contig_1027	cytochrome P450 3A24-like	1.84604e-116	K07424
SPF_FS5_contig_1028	Integrator complex subunit 11	0	K13148
SPF_FS5_contig_1029	ubiquitin-conjugating enzyme E2-17 kDa	4.23313e-98	K06689
SPF_FS5_contig_1031	probable cation-transporting ATPase 13A3 isoform X3	0	K13526
SPF_FS5_contig_1032	prostamide/prostaglandin F synthase-like	8.55402e-56	K15717
SPF_FS5_contig_1033	syndetin isoform X1	0	K23288
SPF_FS5_contig_1034	predicted protein	3.32755e-55
SPF_FS5_contig_1038	protein slowmo	2.6042e-76
SPF_FS5_contig_1039	clusterin-associated protein 1-like	1.47543e-148	K19684
SPF_FS5_contig_1040	trafficking protein particle complex subunit 2-like protein	7.63384e-61	K20301
SPF_FS5_contig_1041	dipeptidyl peptidase 9 isoform X1	0	K08656
SPF_FS5_contig_1044	protein DD3-3-like	0
SPF_FS5_contig_1045	DBH-like monooxygenase protein 1 homolog	2.85649e-70	K00503
SPF_FS5_contig_1046	V-type proton ATPase 21 kDa proteolipid subunit	7.35221e-67	K03661
SPF_FS5_contig_1048	E3 SUMO-protein ligase RanBP2-like isoform X2	5.57047e-36	K12172
SPF_FS5_contig_1049	probable E3 ubiquitin-protein ligase MGRN1 isoform X2	2.17261e-122
SPF_FS5_contig_1050	zinc finger protein on ecdysone puffs-like	4.05223e-13
SPF_FS5_contig_1052	DBH-like monooxygenase protein 1	1.53167e-18
SPF_FS5_contig_1055	protein toll-like	5.59913e-37	K18809
SPF_FS5_contig_1056	thymosin beta isoform X1	6.56123e-49
SPF_FS5_contig_1059	serine/threonine-protein kinase Nek10-like isoform X1	0	K20879
SPF_FS5_contig_1061	SEC23-interacting protein-like isoform X2	1.11158e-167
SPF_FS5_contig_1062	26S proteasome regulatory subunit 6A-B	0	K03065
SPF_FS5_contig_1067	alkylated DNA repair protein alkB homolog 8	3.78943e-70	K10770
SPF_FS5_contig_1069	protein CWC15 homolog A-like	1.08395e-70	K12863
SPF_FS5_contig_1070	rho GTPase-activating protein 15	7.52825e-66	K20636
SPF_FS5_contig_1071	cadherin-23 isoform X1	1.59579e-133
SPF_FS5_contig_1072	Calmodulin, putative	3.65759e-33	K02183
SPF_FS5_contig_1073	calmodulin-like protein 3	8.09664e-32	K02183
SPF_FS5_contig_1074	receptor-type tyrosine-protein phosphatase F-like isoform X1	4.74388e-21	K05695
SPF_FS5_contig_1075	tyrosine-protein phosphatase Lar-like	2.07917e-25	K05695
SPF_FS5_contig_1076	delta-aminolevulinic acid dehydratase	3.48857e-149	K01698
SPF_FS5_contig_1078	Amine sulfotransferase	1.58915e-47	K01025
SPF_FS5_contig_1079	membrane-associated progesterone receptor component 1-like	3.15286e-71	K17278
SPF_FS5_contig_1080	LPXTG cell wall anchor domain-containing protein	6.15962e-06
SPF_FS5_contig_1081	nucleosome assembly protein 1-like 1 isoform X3	1.24011e-130	K11279
SPF_FS5_contig_1083	PREDICTED: uncharacterized protein LOC101240425, partial	5.62837e-99
SPF_FS5_contig_1084	putative integrase core domain protein	1.29645e-117
SPF_FS5_contig_1085	ras-related protein Rab-10-like	5.83713e-114	K07903
SPF_FS5_contig_1089	pyruvate dehydrogenase E1 component subunit beta, mitochondrial	0	K00162
SPF_FS5_contig_1091	glyceraldehyde 3-phosphate dehydrogenase	0	K00134
SPF_FS5_contig_1092	DNA topoisomerase 2-alpha-like isoform X2	0	K03164
SPF_FS5_contig_1093	alsin-like isoform X2	0	K04575
SPF_FS5_contig_1095	chitotriosidase-1 isoform X2	3.51188e-142	K01183
SPF_FS5_contig_1096	very-long-chain 3-oxoacyl-CoA reductase	2.06737e-71	K10251
SPF_FS5_contig_1097	apolipoprotein D-like	1.64834e-37	K03098
SPF_FS5_contig_1099	prolyl 4-hydroxylase subunit alpha-1-like	2.53255e-161	K00472
SPF_FS5_contig_1100	histone RNA hairpin-binding protein	5.74658e-23	K18710
SPF_FS5_contig_1101	piRNA biogenesis protein EXD1-like	1.6175e-25	K18740
SPF_FS5_contig_1102	ras-like protein family member 11B	1.43632e-18	K07852
SPF_FS5_contig_1103	pleckstrin homology domain-containing family G member 5-like isoform X6	6.31374e-107	K19464
SPF_FS5_contig_1104	tyrosine-protein phosphatase non-receptor type 21-like	4.58719e-90	K18025
SPF_FS5_contig_1105	betaine--homocysteine S-methyltransferase 1-like	1.41474e-27	K00544
SPF_FS5_contig_1107	Cytochrome c1, heme protein, mitochondrial	7.09806e-87	K00413
SPF_FS5_contig_1110	heterogeneous nuclear ribonucleoprotein H2	1.59793e-58	K12898
SPF_FS5_contig_1112	cullin-1	0	K03347
SPF_FS5_contig_1113	40S ribosomal protein S4, X isoform	7.62112e-152	K02987
SPF_FS5_contig_1114	glucosidase 2 subunit beta-like	1.07071e-137	K08288
SPF_FS5_contig_1115	epididymal secretory protein E1	1.41189e-40	K13443
SPF_FS5_contig_1116	b(0,+)-type amino acid transporter 1 isoform X4	2.08094e-159	K13868
SPF_FS5_contig_1117	poly [ADP-ribose] polymerase 14-like isoform X1	1.63523e-116
SPF_FS5_contig_1119	F-box/WD repeat-containing protein 1A isoform X1	0	K03362
SPF_FS5_contig_1121	Tyrosine-protein phosphatase 10D	2.68816e-108	K05694
SPF_FS5_contig_1123	ATP synthase beta subunit	4.04536e-133	K02133
SPF_FS5_contig_1124	microtubule-associated protein RP/EB family member 1 isoform X3	3.84358e-92	K10436
SPF_FS5_contig_1125	14-3-3 protein zeta isoform X1	9.60612e-121	K16197
SPF_FS5_contig_1126	cytochrome P450 3A19-like	2.08605e-41	K07424
SPF_FS5_contig_1127	cilia- and flagella-associated protein 20	8.40782e-134
SPF_FS5_contig_1128	THO complex subunit 5 homolog	1.2615e-158	K13174
SPF_FS5_contig_1129	sorting and assembly machinery component 50 homolog	1.14867e-140	K07277
SPF_FS5_contig_1132	CXXC-type zinc finger protein 1-like	7.74646e-33	K14960
SPF_FS5_contig_1134	60S ribosomal protein L35	9.418e-61	K02918
SPF_FS5_contig_1137	dual specificity mitogen-activated protein kinase kinase 1-like isoform X2	0	K04368
SPF_FS5_contig_1138	A-kinase anchor protein 17A-like	3.14885e-107	K13169
SPF_FS5_contig_1139	elongation of very long chain fatty acids protein AAEL008004-like	1.05394e-116	K10250
SPF_FS5_contig_1140	dynein beta chain, ciliary-like	0	K10408
SPF_FS5_contig_1142	Chloride channel protein 2	2.48541e-126	K05011
SPF_FS5_contig_1143	cleft lip and palate transmembrane protein 1 homolog	0
SPF_FS5_contig_1144	ras GTPase-activating protein-binding protein 1	4.96958e-19	K17265
SPF_FS5_contig_1146	calsyntenin-1 isoform X2	1.00308e-44	K22659
SPF_FS5_contig_1148	ubiquitin-like-conjugating enzyme ATG3	1.21689e-151	K08343
SPF_FS5_contig_1149	major vault protein-like	0	K17266
SPF_FS5_contig_1150	ras-like GTP-binding protein Rho1 isoform X2	1.50725e-125	K04513
SPF_FS5_contig_1151	Serine/threonine-protein phosphatase PP1-beta catalytic subunit	0	K06269
SPF_FS5_contig_1154	DNA repair endonuclease XPF	0	K10848
SPF_FS5_contig_1155	cytoplasmic aconitate hydratase-like isoform X2	4.41312e-61	K01681
SPF_FS5_contig_1157	mannan endo-1,4-beta-mannosidase-like	3.83142e-75
SPF_FS5_contig_1159	negative elongation factor B	1.11292e-132	K15180
SPF_FS5_contig_1160	RNA-directed DNA polymerase from mobile element jockey-like	1.25898e-07
SPF_FS5_contig_1161	protocadherin Fat 1-like	0	K16506
SPF_FS5_contig_1162	DNA polymerase epsilon subunit 4	8.48377e-24	K03506
SPF_FS5_contig_1165	fukutin-related protein-like	1.29453e-38
SPF_FS5_contig_1166	DNA excision repair protein ERCC-1	3.66902e-86	K10849
SPF_FS5_contig_1167	carbonic anhydrase 3	2.94468e-36	K01672
SPF_FS5_contig_1170	40S ribosomal protein S16	5.15735e-78	K02960
SPF_FS5_contig_1171	serine/arginine-rich splicing factor 4	2.03135e-24	K12893
SPF_FS5_contig_1173	calpain-B-like isoform X18	0	K08585
SPF_FS5_contig_1174	calmodulin 3b (phosphorylase kinase, delta)	1.37449e-99	K02183
SPF_FS5_contig_1175	ubiquitin-conjugating enzyme E2 T	4.39823e-58	K13960
SPF_FS5_contig_1178	PEST proteolytic signal-containing nuclear protein isoform X2	3.85958e-28
SPF_FS5_contig_1182	ras GTPase-activating protein nGAP isoform X6	1.61297e-145
SPF_FS5_contig_1183	glucose-6-phosphate 1-dehydrogenase-like	0	K00036
SPF_FS5_contig_1184	splicing factor 3A subunit 1	0	K12825
SPF_FS5_contig_1185	prohibitin-2 isoform X1	7.27216e-138	K17081
SPF_FS5_contig_1186	unconventional myosin-Ic-like isoform X1	0	K10356
SPF_FS5_contig_1187	EF-hand	5.40402e-33	K02183
SPF_FS5_contig_1188	60S ribosomal protein L19-like	1.90103e-90	K02885
SPF_FS5_contig_1189	calcium-activated chloride channel regulator 4A-like	7.80354e-13	K05030
SPF_FS5_contig_1190	sigma class glutathione-s-transferase 2	1.9731e-42	K04097
SPF_FS5_contig_1191	5'-AMP-activated protein kinase subunit gamma-1-like isoform X5	5.92767e-126	K07200
SPF_FS5_contig_1192	cationic amino acid transporter 2-like isoform X1	0	K13863
SPF_FS5_contig_1195	cathepsin L-like isoform X2	6.09277e-149	K01373
SPF_FS5_contig_1198	synapse differentiation-inducing gene protein 1-like	8.75013e-08
SPF_FS5_contig_1200	glycoprotein-N-acetylgalactosamine 3-beta-galactosyltransferase 1-like isoform X1	8.03583e-79	K00731
SPF_FS5_contig_1202	60S ribosomal protein L44	2.60507e-57	K02929
SPF_FS5_contig_1203	C-type lectin domain family 4 member E-like	5.59589e-21	K22244
SPF_FS5_contig_1205	lysosomal protective protein-like	4.04617e-94	K13289
SPF_FS5_contig_1206	phosphatidylinositol 3,4,5-trisphosphate 5-phosphatase 2-like isoform X2	1.13534e-177	K15909
SPF_FS5_contig_1207	Protein Shroom2	3.21542e-27	K18625
SPF_FS5_contig_1208	sorbitol dehydrogenase-like	0	K00008
SPF_FS5_contig_1209	DNA primase	7.5055e-21	K05759
SPF_FS5_contig_1210	complexin-like isoform X1	2.53725e-12	K15294
SPF_FS5_contig_1211	malignant fibrous histiocytoma-amplified sequence 1 homolog	1.79134e-12
SPF_FS5_contig_1212	ankyrin repeat and protein kinase domain-containing protein 1	1.36689e-25	K04367
SPF_FS5_contig_1216	beta-ureidopropionase-like isoform X1	0	K01431
SPF_FS5_contig_1217	putative RNA-directed DNA polymerase from transposon X-element	5.66687e-46
SPF_FS5_contig_1219	glycoside hydrolase family 10	5.12514e-92	K01181
SPF_FS5_contig_1221	leucine rich repeat protein	6.20291e-44	K19613
SPF_FS5_contig_1223	glucose-regulated protein 94	0	K09487
SPF_FS5_contig_1225	26S proteasome non-ATPase regulatory subunit 14	0	K03030
SPF_FS5_contig_1226	transient receptor potential cation channel subfamily A member 1 homolog	0	K04984
SPF_FS5_contig_1228	mitogen-activated protein kinase kinase kinase 8-like	2.11298e-16	K04420
SPF_FS5_contig_1229	Golgi-associated plant pathogenesis-related protein 1	1.14259e-07
SPF_FS5_contig_1230	1-acyl-sn-glycerol-3-phosphate acyltransferase alpha	3.47711e-80	K13509
SPF_FS5_contig_1231	succinate--CoA ligase [ADP-forming] subunit beta, mitochondrial-like isoform X1	0	K01900
SPF_FS5_contig_1238	LPXTG cell wall anchor domain-containing protein	6.14394e-08
SPF_FS5_contig_1240	uncharacterized protein LOC106178574	2.01978e-127
SPF_FS5_contig_1241	tyrosine-protein kinase transmembrane receptor ROR1-like isoform X1	1.37106e-80	K05122
SPF_FS5_contig_1242	calcium uniporter protein, mitochondrial	8.37381e-97	K20858
SPF_FS5_contig_1243	PREDICTED: uncharacterized protein LOC106807658	1.10327e-46
SPF_FS5_contig_1244	serpin B3-like	9.63751e-49	K13963
SPF_FS5_contig_1245	glycerol-3-phosphate acyltransferase 4-like isoform X2	1.76472e-166	K13506
SPF_FS5_contig_1249	myosin heavy chain	0	K17751
SPF_FS5_contig_1250	cathepsin B	4.73286e-164	K01363
SPF_FS5_contig_1251	serine/threonine-protein kinase ULK2 isoform X1	1.16308e-143	K08269
SPF_FS5_contig_1255	lysosomal protective protein-like	7.29349e-156	K13289
SPF_FS5_contig_1256	High mobility group protein DSP1	7.01605e-21	K11295
SPF_FS5_contig_1257	disheveled-associated activator of morphogenesis 1	0	K04512
SPF_FS5_contig_1258	nose resistant to fluoxetine protein 6-like	6.31958e-133
SPF_FS5_contig_1259	E3 ubiquitin-protein ligase NEDD4-like isoform X1	0
SPF_FS5_contig_1261	RRP12-like protein	0	K14794
SPF_FS5_contig_1262	high choriolytic enzyme 1-like	3.2687e-65
SPF_FS5_contig_1263	serine/arginine-rich splicing factor 7-like	1.47613e-28	K12896
SPF_FS5_contig_1264	melanotransferrin-like isoform X1	0	K06569
SPF_FS5_contig_1265	pancreatic triacylglycerol lipase-like	6.79036e-89	K14073
SPF_FS5_contig_1266	carnitine O-palmitoyltransferase 1, liver isoform-like isoform X1	0	K08765
SPF_FS5_contig_1268	cytohesin-1 isoform X3	0	K18441
SPF_FS5_contig_1269	GPI mannosyltransferase 4-like	2.20692e-26	K08098
SPF_FS5_contig_1270	lactase-phlorizin hydrolase-like	1.42853e-08
SPF_FS5_contig_1272	glutamate dehydrogenase, mitochondrial	0	K00261
SPF_FS5_contig_1273	putative aminopeptidase-2 isoform X1	0
SPF_FS5_contig_1274	galactoside 2-alpha-L-fucosyltransferase 1	1.13987e-39	K00718
SPF_FS5_contig_1277	ester hydrolase C11orf54 homolog	9.88066e-107
SPF_FS5_contig_1281	peptidase	6.04638e-69
SPF_FS5_contig_1283	multidrug resistance-associated protein 4	0	K05673
SPF_FS5_contig_1284	DNA damage-regulated autophagy modulator protein 2	4.44539e-33	K21956
SPF_FS5_contig_1285	peptidyl-prolyl cis-trans isomerase-like	1.10721e-101	K09565
SPF_FS5_contig_1286	YTH domain-containing family protein 2-like isoform X2	1.60897e-127	K20102
SPF_FS5_contig_1288	putative ribonuclease ZC3H12C	1.19984e-93	K18668
SPF_FS5_contig_1289	ATP-binding cassette sub-family A member 5 isoform X2	0	K05648
SPF_FS5_contig_1297	mitochondrial glutamate carrier 1-like	1.05092e-123	K15107
SPF_FS5_contig_1298	C-type lectin	8.18566e-27
SPF_FS5_contig_1299	Aldo/keto reductase	4.35415e-64
SPF_FS5_contig_1300	dihydropyrimidinase isoform X4	0	K01464
SPF_FS5_contig_1306	myosin-2 heavy chain-like	0
SPF_FS5_contig_1307	40S ribosomal protein S20	8.02562e-71	K02969
SPF_FS5_contig_1308	protein HEXIM-like	9.63208e-22	K15189
SPF_FS5_contig_1309	A disintegrin and metalloproteinase with thrombospondin motifs 7-like	0	K08626
SPF_FS5_contig_1310	heat shock protein 60	0	K04077
SPF_FS5_contig_1312	angiotensin-converting enzyme	0	K01283
SPF_FS5_contig_1313	CAP-Gly domain-containing linker protein 1	3.33368e-94
SPF_FS5_contig_1315	ras-related protein Rab-3 isoform X4	1.35442e-19	K07883
SPF_FS5_contig_1316	Endoglucanase A	0	K01179
SPF_FS5_contig_1319	solute carrier family 46 member 3-like	2.73067e-50	K14613
SPF_FS5_contig_1320	multidrug resistance-associated protein 4 isoform X2	1.80857e-168	K05673
SPF_FS5_contig_1322	ras-related protein rab7	1.90287e-121	K07897
SPF_FS5_contig_1323	ecdysone-induced protein 75B, isoforms C/D-like isoform X1	3.3952e-60
SPF_FS5_contig_1324	60S acidic ribosomal protein P1-like	7.2281e-25	K02942
SPF_FS5_contig_1325	isocitrate dehydrogenase [NADP] cytoplasmic	0	K00031
SPF_FS5_contig_1326	peptidoglycan-binding protein	5.87812e-29
SPF_FS5_contig_1331	glycerol-3-phosphate phosphatase-like	8.36832e-87	K19269
SPF_FS5_contig_1334	MAP/microtubule affinity-regulating kinase 3-like isoform X6	2.08501e-57	K08798
SPF_FS5_contig_1336	Cathepsin L	2.83758e-14	K01365
SPF_FS5_contig_1339	vacuolar protein sorting-associated protein 37B	7.39078e-32	K12185
SPF_FS5_contig_1340	Leucine rich repeat protein	6.73903e-29	K19613
SPF_FS5_contig_1341	kinesin-II 95 kDa subunit-like	0	K20196
SPF_FS5_contig_1343	serine/threonine-protein phosphatase PGAM5, mitochondrial isoform X1	8.62475e-98	K15637
SPF_FS5_contig_1344	arf-GAP with Rho-GAP domain, ANK repeat and PH domain-containing protein 1-like isoform X1	0	K18439
SPF_FS5_contig_1345	60S ribosomal protein L31	4.05152e-54	K02910
SPF_FS5_contig_1348	protein sprint isoform X1	7.86566e-84	K23687
SPF_FS5_contig_1350	receptor expression-enhancing protein 1-like isoform X4	3.6589e-22	K17338
SPF_FS5_contig_1351	ubiquitin carboxyl-terminal hydrolase 4 isoform X2	0	K21343
SPF_FS5_contig_1353	peroxisomal biogenesis factor 19 isoform X2	2.94474e-41	K13337
SPF_FS5_contig_1354	Chitin synthase 3	0	K00698
SPF_FS5_contig_1355	paired amphipathic helix protein Sin3a	0	K11644
SPF_FS5_contig_1357	probable dolichol-phosphate mannosyltransferase	2.03424e-66	K00721
SPF_FS5_contig_1358	phospholipase B1, membrane-associated	1.75289e-39
SPF_FS5_contig_1359	phospholipase B1, membrane-associated-like	3.12531e-09
SPF_FS5_contig_1360	phospholipase B1, membrane-associated-like	4.47301e-09
SPF_FS5_contig_1361	AP-4 complex subunit mu-1 isoform X1	7.55823e-13	K12402
SPF_FS5_contig_1362	proto-oncogene tyrosine-protein kinase Yrk-like isoform X1	0	K08892
SPF_FS5_contig_1364	cyclase	6.89838e-64
SPF_FS5_contig_1365	membrane-associated phosphatidylinositol transfer protein 2-like isoform X4	0
SPF_FS5_contig_1366	polyribonucleotide 5'-hydroxyl-kinase Clp1	0	K14399
SPF_FS5_contig_1368	troponin i	1.37439e-27
SPF_FS5_contig_1370	VWFA and cache domain-containing protein 1-like	3.1387e-09
SPF_FS5_contig_1371	transmembrane protein 131	0
SPF_FS5_contig_1374	CD9 antigen, like	6.17681e-21	K06460
SPF_FS5_contig_1378	radixin isoform X1	3.2795e-154	K05762
SPF_FS5_contig_1379	cytosolic non-specific dipeptidase	0	K08660
SPF_FS5_contig_1380	bifunctional D-cysteine desulfhydrase/1-aminocyclopropane-1-carboxylate deaminase, mitochondrial-like	1.59515e-128	K05396
SPF_FS5_contig_1383	Selenium-binding protein 1	0	K17285
SPF_FS5_contig_1386	1,2-dihydroxy-3-keto-5-methylthiopentene dioxygenase-like	2.67993e-44	K08967
SPF_FS5_contig_1391	probable ATP-dependent RNA helicase DDX58	3.03838e-07
SPF_FS5_contig_1392	filamin-A-like isoform X1	0	K04437
SPF_FS5_contig_1393	protein henna isoform X2	1.02373e-137	K00500
SPF_FS5_contig_1394	phenylalanine-4-hydroxylase	6.42487e-126	K00500
SPF_FS5_contig_1396	drebrin-like protein B isoform X1	3.2467e-64	K20520
SPF_FS5_contig_1397	inner nuclear membrane protein Man1	2.54034e-37	K19410
SPF_FS5_contig_1398	arachidonate 5-lipoxygenase	3.96342e-134	K00461
SPF_FS5_contig_1399	60S ribosomal protein L15	8.30347e-106	K02877
SPF_FS5_contig_1400	protein henna isoform X2	3.21493e-08
SPF_FS5_contig_1401	dnaJ homolog subfamily B member 13-like	0	K09519
SPF_FS5_contig_1402	cdc42 homolog	6.93972e-115	K04393
SPF_FS5_contig_1406	staphylococcal nuclease domain-containing protein 1-like	0	K15979
SPF_FS5_contig_1407	UMP-CMP kinase	2.01016e-88	K13800
SPF_FS5_contig_1408	phosphoglycerate mutase	6.59431e-134	K01834
SPF_FS5_contig_1410	netrin-1-like isoform X1	5.71637e-112	K06843
SPF_FS5_contig_1412	mammalian ependymin-related protein 1-like	1.46865e-10
SPF_FS5_contig_1414	clathrin light chain B-like isoform X2	6.11948e-40	K04644
SPF_FS5_contig_1415	transmembrane 9 superfamily member 2	0	K17086
SPF_FS5_contig_1417	synapse differentiation-inducing gene protein 1-like	2.1186e-08
SPF_FS5_contig_1418	enkurin	5.55313e-106
SPF_FS5_contig_1424	ATP-binding cassette sub-family A member 3	0	K05643
SPF_FS5_contig_1426	carboxypeptidase B-like	7.85672e-92	K01298
SPF_FS5_contig_1431	THO complex subunit 4-like	8.64276e-50	K12881
SPF_FS5_contig_1434	aspartate--tRNA ligase, cytoplasmic	0	K22503
SPF_FS5_contig_1437	ADP-ribosylation factor-like	2.46017e-42	K07937
SPF_FS5_contig_1438	V-type proton ATPase subunit d	0	K02146
SPF_FS5_contig_1439	GTP cyclohydrolase 1 feedback regulatory protein	1.26266e-27
SPF_FS5_contig_1441	tight junction protein ZO-1-like isoform X2	1.58307e-83	K05701
SPF_FS5_contig_1444	leucine-rich repeat-containing protein 9-like	2.95901e-42	K17550
SPF_FS5_contig_1445	matrix metalloproteinase-17	1.32274e-96	K07997
SPF_FS5_contig_1446	YTH domain-containing protein 1-like	9.72829e-73	K20100
SPF_FS5_contig_1448	adhesion G protein-coupled receptor L2-like isoform X1	5.51594e-39	K04592
SPF_FS5_contig_1449	unconventional myosin-IXa-like isoform X5	3.33846e-91	K10360
SPF_FS5_contig_1450	cathepsin L	1.12678e-135	K01365
SPF_FS5_contig_1451	Monocarboxylate transporter 12	3.48413e-123
SPF_FS5_contig_1452	NEDD4 family-interacting protein 1	1.43177e-15
SPF_FS5_contig_1453	neurogenic locus notch homolog protein 1-like	0
SPF_FS5_contig_1456	RING finger protein 151-like	3.96853e-88	K11981
SPF_FS5_contig_1457	myosin-G heavy chain-like isoform X2	2.70838e-20	K06560
SPF_FS5_contig_1458	cytoplasmic dynein 1 heavy chain 1-like isoform X3	0
SPF_FS5_contig_1459	neuroblast differentiation-associated protein AHNAK isoform X1	1.70043e-39
SPF_FS5_contig_1460	Chitin synthase 6	1.46406e-71	K00698
SPF_FS5_contig_1462	lysoplasmalogenase-like protein TMEM86A	2.66206e-81
SPF_FS5_contig_1463	Apoptosis inhibitor IAP	6.06488e-12	K16060
SPF_FS5_contig_1467	gamma-butyrobetaine dioxygenase	1.53521e-72	K00471
SPF_FS5_contig_1468	chitin synthase	0	K00698
SPF_FS5_contig_1469	AP-1 complex subunit beta-1 isoform X2	0	K12392
SPF_FS5_contig_1470	actin-interacting protein 1	0
SPF_FS5_contig_1474	cysteine protease ATG4A	1.87185e-112	K08342
SPF_FS5_contig_1475	integrin beta-1-binding protein 1	9.25105e-34	K20058
SPF_FS5_contig_1476	forkhead box protein N3 isoform X1	6.89524e-109	K09407
SPF_FS5_contig_1477	Nucleoside diphosphate kinase	1.62947e-82	K00940
SPF_FS5_contig_1478	26S proteasome non-ATPase regulatory subunit 5	2.60106e-53	K06692
SPF_FS5_contig_1479	glypican-6-like isoform X2	2.65947e-87
SPF_FS5_contig_1480	histone-lysine N-methyltransferase 2C	2.09249e-96
SPF_FS5_contig_1481	suppressor of tumorigenicity 14 protein homolog	1.74025e-63	K01362
SPF_FS5_contig_1482	monocarboxylate transporter 5	3.94927e-161
SPF_FS5_contig_1483	60S ribosomal protein L15-1	6.43402e-50	K02877
SPF_FS5_contig_1485	NADH dehydrogenase subunit 4 (mitochondrion)	1.24745e-108	K03881
SPF_FS5_contig_1488	microsomal triglyceride transfer protein large subunit-like	4.62927e-120	K14463
SPF_FS5_contig_1489	hypothetical protein CAPTEDRAFT_206914, partial	6.57621e-16
SPF_FS5_contig_1491	lamin Dm0	1.40279e-114	K07611
SPF_FS5_contig_1492	GPI-anchor transamidase-like	3.7178e-178	K05290
SPF_FS5_contig_1495	CD109 antigen-like	0
SPF_FS5_contig_1499	thioredoxin-like protein 4A	2.78437e-94	K12859
SPF_FS5_contig_1500	probable phospholipid-transporting ATPase IA isoform X7	0	K14802
SPF_FS5_contig_1504	D-aspartate oxidase	4.0995e-69	K00272
SPF_FS5_contig_1506	solute carrier family 2, facilitated glucose transporter member 1 isoform X1	0	K07299
SPF_FS5_contig_1507	2-oxoglutarate dehydrogenase, mitochondrial-like isoform X1	0	K00164
SPF_FS5_contig_1508	Ornithine decarboxylase antizyme 1	4.64756e-41	K16548
SPF_FS5_contig_1510	saccharopine dehydrogenase-like oxidoreductase	3.63384e-112
SPF_FS5_contig_1511	asparagine synthetase domain-containing protein 1	4.87746e-171
SPF_FS5_contig_1512	S-adenosylmethionine synthase isoform type-1	0	K00789
SPF_FS5_contig_1513	probable ATP-dependent RNA helicase DDX58	2.95897e-119	K12646
SPF_FS5_contig_1514	DBH-like monooxygenase protein 1	1.16303e-66	K00503
SPF_FS5_contig_1515	Tubulin alpha-1C chain	0	K07374
SPF_FS5_contig_1516	phosphatidylinositol transfer protein beta isoform isoform X1	1.5481e-141
SPF_FS5_contig_1517	iron-sulfur cluster assembly enzyme ISCU, mitochondrial	4.13937e-75	K22068
SPF_FS5_contig_1518	tyrosine-protein phosphatase Lar isoform X1	0	K05695
SPF_FS5_contig_1520	ribosome biogenesis protein BRX1 homolog	3.78845e-133	K14820
SPF_FS5_contig_1521	phospholipase B1, membrane-associated-like	8.55909e-148
SPF_FS5_contig_1522	oxysterol-binding protein-related protein 8	0	K22285
SPF_FS5_contig_1523	tumor necrosis factor ligand superfamily member 10-like	1.46369e-13	K04721
SPF_FS5_contig_1525	aquaporin AQPAe.a-like	2.22575e-66	K09866
SPF_FS5_contig_1526	40S ribosomal protein S13-2	3.84716e-49	K02953
SPF_FS5_contig_1528	importin subunit beta-1-like isoform X1	2.19534e-07
SPF_FS5_contig_1530	hematopoietic prostaglandin D synthase	1.32997e-47	K04097
SPF_FS5_contig_1531	hematopoietic prostaglandin D synthase	1.04317e-48	K04097
SPF_FS5_contig_1532	hematopoietic prostaglandin D synthase	1.30278e-49	K04097
SPF_FS5_contig_1535	erlin-1	2.41046e-161	K23341
SPF_FS5_contig_1536	N-acyl-phosphatidylethanolamine-hydrolyzing phospholipase D-like	2.63885e-123	K13985
SPF_FS5_contig_1538	ras GTPase-activating-like protein IQGAP1 isoform X1	0
SPF_FS5_contig_1540	hypothetical protein LOTGIDRAFT_157475	2.08584e-50
SPF_FS5_contig_1541	zinc finger protein 507-like	4.10607e-75
SPF_FS5_contig_1543	ammonium transporter Rh type A-like	4.00212e-132	K06580
SPF_FS5_contig_1544	guanine nucleotide-binding protein subunit beta-5	2.12544e-167	K04539
SPF_FS5_contig_1551	C-type lectin domain family 10 member A-like	2.247e-16	K06560
SPF_FS5_contig_1552	galactose-specific lectin nattectin-like	2.70803e-20	K06560
SPF_FS5_contig_1553	nitric oxide synthase, brain-like isoform X1	0	K13240
SPF_FS5_contig_1554	estradiol 17-beta-dehydrogenase 12	1.14822e-42	K10251
SPF_FS5_contig_1555	lysosome-associated membrane glycoprotein 1-like	1.47878e-05
SPF_FS5_contig_1556	predicted protein	2.40001e-14	K17253
SPF_FS5_contig_1557	predicted protein	1.96569e-16	K06560
SPF_FS5_contig_1558	aldose reductase-like	5.45875e-10
SPF_FS5_contig_1559	aldose reductase-like	1.41172e-129	K00002
SPF_FS5_contig_1560	Copper-transporting ATPase 1	0	K17686
SPF_FS5_contig_1561	inactive phospholipase C-like protein 2 isoform X1	0	K15370
SPF_FS5_contig_1562	receptor-type tyrosine-protein phosphatase kappa-like isoform X2	3.04648e-175	K13297
SPF_FS5_contig_1563	parkin coregulated gene protein homolog	9.341e-136
SPF_FS5_contig_1564	lysosomal acid phosphatase	1.75574e-103	K14410
SPF_FS5_contig_1565	Sphingosine-1-phosphate phosphatase 1	1.06694e-31	K04716
SPF_FS5_contig_1566	GTPase HRas	4.40937e-100	K07827
SPF_FS5_contig_1567	BPTI/Kunitz domain-containing protein 4-like	8.46504e-13
SPF_FS5_contig_1569	Vacuolar protein sorting-associated protein 4B	6.75942e-79	K12196
SPF_FS5_contig_1570	cytochrome c oxidase subunit I (mitochondrion)	4.12808e-57	K02256
SPF_FS5_contig_1572	transmembrane protein 56-B-like	2.72825e-48
SPF_FS5_contig_1574	transcription factor CP2-like protein 1 isoform X2	4.3437e-104	K09275
SPF_FS5_contig_1575	proteasome subunit beta type-4	1.36038e-120	K02736
SPF_FS5_contig_1576	ileal sodium/bile acid cotransporter	1.89247e-52	K14343
SPF_FS5_contig_1577	transmembrane emp24 domain-containing protein 4	8.15033e-84	K20346
SPF_FS5_contig_1579	TNF receptor-associated factor 2-like	2.31178e-26	K03174
SPF_FS5_contig_1580	TNF receptor-associated factor 2-like	1.35387e-30	K03174
SPF_FS5_contig_1581	innexin unc-9 isoform X6	5.94366e-41	K22037
SPF_FS5_contig_1582	pyridoxal kinase	9.48468e-119	K00868
SPF_FS5_contig_1583	band 4.1-like protein 5 isoform X2	4.94158e-159
SPF_FS5_contig_1584	hypothetical protein Smp_130910	5.54819e-35
SPF_FS5_contig_1585	synaptic vesicle 2-related protein	2.16909e-132
SPF_FS5_contig_1586	peroxidasin homolog isoform X1	2.69527e-09	K19511
SPF_FS5_contig_1587	mediator of RNA polymerase II transcription subunit 10-like	8.22466e-63	K15151
SPF_FS5_contig_1588	ER lumen protein-retaining receptor 1	1.24404e-107	K10949
SPF_FS5_contig_1589	CREB-binding protein	6.20037e-115	K04498
SPF_FS5_contig_1590	histone-lysine N-methyltransferase 2C-like	0
SPF_FS5_contig_1591	protein TFG-like isoform X3	6.06671e-46	K09292
SPF_FS5_contig_1593	centlein isoform X2	4.9541e-66	K16467
SPF_FS5_contig_1594	innexin unc-9 isoform X6	4.04267e-133	K22037
SPF_FS5_contig_1596	4-aminobutyrate transaminase	2.25114e-10	K13524
SPF_FS5_contig_1597	4-aminobutyrate aminotransferase, mitochondrial	4.3631e-67	K13524
SPF_FS5_contig_1598	protein lifeguard 4-like	5.93204e-75	K06890
SPF_FS5_contig_1600	E3 ubiquitin-protein ligase Su(dx)	0	K05633
SPF_FS5_contig_1601	Golgi phosphoprotein 3-like	3.06646e-134	K15620
SPF_FS5_contig_1602	choline transporter-like protein 2	0	K15377
SPF_FS5_contig_1603	beta-1,4-N-acetylgalactosaminyltransferase bre-4	7.42144e-86	K07966
SPF_FS5_contig_1605	acid trehalase-like protein 1	1.6764e-89	K22078
SPF_FS5_contig_1606	probable nuclear hormone receptor HR3 isoform X5	3.53167e-87	K14033
SPF_FS5_contig_1608	epithelial splicing regulatory protein 1 isoform X1	0	K14947
SPF_FS5_contig_1609	ubiquitin carboxyl-terminal hydrolase 19-like	2.55658e-131	K11847
SPF_FS5_contig_1610	Histone H3.3	3.04768e-86	K11253
SPF_FS5_contig_1614	uncharacterized protein LOC106167169	3.39206e-23
SPF_FS5_contig_1615	intraflagellar transport protein 43 homolog	4.92764e-35	K19675
SPF_FS5_contig_1617	CD151 antigen-like	9.52097e-30	K17352
SPF_FS5_contig_1618	transcription elongation factor SPT6	0	K11292
SPF_FS5_contig_1620	transketolase-like protein 2	0	K00615
SPF_FS5_contig_1622	retinol dehydrogenase 13-like	2.8068e-88	K11153
SPF_FS5_contig_1624	dolichyl-diphosphooligosaccharide--protein glycosyltransferase subunit 1-like	0	K12666
SPF_FS5_contig_1625	protein transport protein Sec24A-like isoform X2	0	K14007
SPF_FS5_contig_1626	ryanodine receptor 44F isoform X15	0	K04962
SPF_FS5_contig_1627	alpha amylase	3.01713e-38	K01176
SPF_FS5_contig_1628	glutamine synthetase	0	K01915
SPF_FS5_contig_1629	protein wntless homolog	7.35814e-138
SPF_FS5_contig_1631	two pore calcium channel protein 1-like	0	K16897
SPF_FS5_contig_1632	pre-mRNA-processing factor 39	1.67123e-106	K13217
SPF_FS5_contig_1636	glutathione S-transferase	2.20503e-25	K04097
SPF_FS5_contig_1637	sorting nexin-13	2.16345e-180	K17925
SPF_FS5_contig_1638	stAR-related lipid transfer protein 5	2.37667e-58
SPF_FS5_contig_1640	sphingomyelin phosphodiesterase 3	8.16897e-58	K12352
SPF_FS5_contig_1643	Chloride intracellular channel exc-4	2.57068e-57	K05022
SPF_FS5_contig_1645	E3 ubiquitin-protein ligase SMURF2	0	K04678
SPF_FS5_contig_1646	F-actin-capping protein subunit beta isoform X2	1.76028e-171	K10365
SPF_FS5_contig_1647	dual adapter for phosphotyrosine and 3-phosphotyrosine and 3-phosphoinositide	9.74258e-22	K12229
SPF_FS5_contig_1648	E3 ubiquitin-protein ligase MIB2	0
SPF_FS5_contig_1650	actin binding lim protein 1	1.54814e-14	K07520
SPF_FS5_contig_1651	protein disulfide-isomerase domain protein	0	K09580
SPF_FS5_contig_1652	cullin-3 isoform X2	0	K03869
SPF_FS5_contig_1653	NFX1-type zinc finger-containing protein 1	0
SPF_FS5_contig_1655	Nucleosome assembly protein 1-like 4	2.97976e-80	K11279
SPF_FS5_contig_1657	brain protein I3-like	1.43038e-09
SPF_FS5_contig_1658	nuclear pore complex protein Nup153	3.60451e-35	K14296
SPF_FS5_contig_1660	X-box-binding protein 1	6.94047e-14	K09027
SPF_FS5_contig_1661	myosin heavy chain	1.1863e-65	K17751
SPF_FS5_contig_1663	inhibitor of nuclear factor kappa-B kinase subunit epsilon	3.93321e-180	K05410
SPF_FS5_contig_1664	IQ motif and SEC7 domain-containing protein 1 isoform X3	6.92247e-136	K12495
SPF_FS5_contig_1666	putative ascorbate peroxidase	9.24793e-16	K00428
SPF_FS5_contig_1668	mannosyl-oligosaccharide 1,2-alpha-mannosidase IB	0	K01230
SPF_FS5_contig_1670	amiloride-sensitive amine oxidase [copper-containing]	5.71978e-34	K11182
SPF_FS5_contig_1671	amiloride-sensitive amine oxidase [copper-containing]-like	5.6415e-110	K11182
SPF_FS5_contig_1672	amiloride-sensitive amine oxidase [copper-containing]-like	5.16357e-76	K11182
SPF_FS5_contig_1673	nucleoredoxin-like	1.55013e-146	K17609
SPF_FS5_contig_1674	V-type proton ATPase catalytic subunit A	0	K02145
SPF_FS5_contig_1676	aldose 1-epimerase	1.86238e-14	K01785
SPF_FS5_contig_1677	aldose 1-epimerase	5.19447e-19	K01785
SPF_FS5_contig_1678	Dual oxidase 2	0	K13411
SPF_FS5_contig_1680	TPR repeat-containing protein DDB_G0287407 isoform X1	1.64001e-50
SPF_FS5_contig_1682	lysosomal alpha-mannosidase-like	3.11285e-62	K12311
SPF_FS5_contig_1683	mammalian ependymin-related protein 1-like	2.07498e-41
SPF_FS5_contig_1684	60S ribosomal protein L22-like	1.27491e-33	K02891
SPF_FS5_contig_1692	E3 ubiquitin-protein ligase MIB2 isoform X1	1.24414e-83
SPF_FS5_contig_1697	ras-related protein Rab-2	3.67574e-88	K07877
SPF_FS5_contig_1698	ER membrane protein complex subunit 3-like	2.51011e-126	K23564
SPF_FS5_contig_1704	moesin/ezrin/radixin homolog 1-like isoform X1	1.58296e-25	K05762
SPF_FS5_contig_1705	cytochrome P450 4V2	7.70605e-12	K07427
SPF_FS5_contig_1708	poly(U)-specific endoribonuclease-C-like	1.77194e-73	K14648
SPF_FS5_contig_1710	fibroblast growth factor receptor 2 isoform X3	7.97608e-173	K05093
SPF_FS5_contig_1711	acetyl-CoA acetyltransferase, mitochondrial	2.0512e-179	K00626
SPF_FS5_contig_1713	cAMP-dependent protein kinase type II regulatory subunit	6.87991e-115	K04739
SPF_FS5_contig_1714	splicing factor 3B subunit 6-like protein	1.93996e-54	K12833
SPF_FS5_contig_1717	uncharacterized protein LOC106166028	0
SPF_FS5_contig_1718	cilia- and flagella-associated protein 53-like	1.46029e-81
SPF_FS5_contig_1719	hypothetical protein	9.06026e-33
SPF_FS5_contig_1721	E3 ubiquitin-protein ligase TRIM56	1.23942e-12	K11997
SPF_FS5_contig_1722	translocation protein SEC62	3.81922e-49	K12275
SPF_FS5_contig_1723	CCR4-NOT transcription complex subunit 10 isoform X1	2.50406e-140	K12607
SPF_FS5_contig_1724	superoxide dismutase [Mn], mitochondrial	1.55857e-56	K04564
SPF_FS5_contig_1725	atrial natriuretic peptide-converting enzyme-like	0	K23489
SPF_FS5_contig_1726	triple functional domain protein isoform X4	0	K15048
SPF_FS5_contig_1727	CREB-regulated transcription coactivator 1	8.06728e-05
SPF_FS5_contig_1728	tricarboxylate transport protein, mitochondrial-like	4.07195e-164	K15100
SPF_FS5_contig_1732	N-acylethanolamine-hydrolyzing acid amidase isoform X1	1.21148e-116	K13720
SPF_FS5_contig_1733	forkhead box protein K1-like	4.80406e-81	K09404
SPF_FS5_contig_1735	UNC93-like protein MFSD11 isoform X2	2.2324e-147
SPF_FS5_contig_1736	dihydropyrimidine dehydrogenase [NADP(+)] isoform X1	0	K00207
SPF_FS5_contig_1738	Charged multivesicular body protein 5	2.42023e-115	K12198
SPF_FS5_contig_1741	alpha-N-acetylgalactosaminidase-like isoform X2	6.87469e-160	K01204
SPF_FS5_contig_1742	phosphatidylinositol 3-kinase regulatory subunit alpha-like	0	K02649
SPF_FS5_contig_1743	ZAG-1	6.46131e-41	K23560
SPF_FS5_contig_1744	Splicing factor 4	8.1608e-81	K13096
SPF_FS5_contig_1745	guanine nucleotide exchange factor, putative	2.41458e-110	K07525
SPF_FS5_contig_1748	peptidyl-prolyl cis-trans isomerase-like 3	1.58321e-87	K12734
SPF_FS5_contig_1754	epithelial chloride channel protein-like	8.23914e-164	K05030
SPF_FS5_contig_1755	beta-hexosaminidase subunit beta-like	3.58738e-98	K12373
SPF_FS5_contig_1756	cytoplasmic polyadenylation element-binding protein 2-like	0	K02602
SPF_FS5_contig_1757	transmembrane 9 superfamily member 4-like	0	K17086
SPF_FS5_contig_1758	3-ketodihydrosphingosine reductase	4.38546e-17	K04708
SPF_FS5_contig_1759	casein kinase I-like isoform X1	0	K08959
SPF_FS5_contig_1761	5-aminolevulinate synthase, erythroid-specific, mitochondrial isoform X1	0	K00643
SPF_FS5_contig_1764	dynein heavy chain 6, axonemal-like	0	K10408
SPF_FS5_contig_1765	uncharacterized protein LOC106168567	7.86282e-171
SPF_FS5_contig_1766	carboxypeptidase D-like	0	K07752
SPF_FS5_contig_1768	pyruvate dehydrogenase protein X component, mitochondrial	6.75918e-87	K13997
SPF_FS5_contig_1769	sodium/potassium-transporting ATPase subunit alpha isoform X1	0
SPF_FS5_contig_1771	mitogen-activated protein kinase kinase kinase MLT isoform X1	0	K04424
SPF_FS5_contig_1772	alpha-L-fucosidase-like	1.69571e-24	K01206
SPF_FS5_contig_1776	thymosin beta isoform X2	6.14112e-31
SPF_FS5_contig_1777	protein phosphatase Slingshot homolog 2 isoform X1	1.60665e-157	K05766
SPF_FS5_contig_1780	putative GTP-binding protein 6	3.75315e-118
SPF_FS5_contig_1781	syntaxin-7-like isoform X1	7.93041e-44	K08488
SPF_FS5_contig_1782	calcium/calmodulin-dependent protein kinase type IV-like	1.42877e-160	K05869
SPF_FS5_contig_1783	lysosome membrane protein 2-like	3.06511e-111	K12384
SPF_FS5_contig_1785	THO complex subunit 7 homolog	1.35817e-70	K13176
SPF_FS5_contig_1789	clathrin heavy chain 1	0
SPF_FS5_contig_1790	G patch domain-containing protein 8	3.41794e-09	K13172
SPF_FS5_contig_1791	granulins isoform X2	2.17446e-17	K23879
SPF_FS5_contig_1793	ras-related protein Rab-1A	1.24519e-127	K07874
SPF_FS5_contig_1794	AChain A, The Structure Of The Axh Domain Of Ataxin-1.	2.99064e-40	K23616
SPF_FS5_contig_1795	F-actin-uncapping protein LRRC16A-like isoform X3	0	K20493
SPF_FS5_contig_1796	Growth hormone-inducible transmembrane protein	4.86266e-100	K21890
SPF_FS5_contig_1797	histone-lysine N-methyltransferase 2A	5.56706e-83	K14959
SPF_FS5_contig_1798	glucose-induced degradation protein 8 homolog	7.25519e-69	K23338
SPF_FS5_contig_1799	PREDICTED: uncharacterized protein LOC106079615	4.57583e-62
SPF_FS5_contig_1800	cytochrome c oxidase polypeptide	7.12606e-07
SPF_FS5_contig_1802	calpain-B-like isoform X15	0	K08585
SPF_FS5_contig_1803	tubulin alpha-1A chain-like	7.9512e-179	K07374
SPF_FS5_contig_1804	myeloid differentiation primary response protein MyD88	3.78585e-52	K04729
SPF_FS5_contig_1805	maltase-glucoamylase, intestinal-like	0
SPF_FS5_contig_1806	elongation factor 1-delta-like isoform X1	4.15024e-85	K15410
SPF_FS5_contig_1807	3-ketoacyl-CoA thiolase, mitochondrial	0	K07508
SPF_FS5_contig_1809	carbonic anhydrase 4-like	4.49438e-50	K01672
SPF_FS5_contig_1810	probable 3',5'-cyclic phosphodiesterase pde-5 isoform X3	0	K18438
SPF_FS5_contig_1812	importin subunit beta-1-like	1.71794e-94	K14293
SPF_FS5_contig_1822	malignant fibrous histiocytoma-amplified sequence 1 homolog	3.27714e-68
SPF_FS5_contig_1827	junctophilin-1-like isoform X1	7.10384e-151	K19530
SPF_FS5_contig_1828	tRNA-dihydrouridine(47) synthase [NAD(P)(+)]-like	0	K05544
SPF_FS5_contig_1829	glutamine--fructose-6-phosphate aminotransferase [isomerizing] 1	0	K00820
SPF_FS5_contig_1830	glutathione gamma-glutamylcysteinyltransferase 1-like	2.14261e-75	K05941
SPF_FS5_contig_1831	probable ATP-dependent RNA helicase DDX56	3.14346e-137	K14810
SPF_FS5_contig_1832	probable ATP-dependent RNA helicase DDX56	5.80825e-121	K14810
SPF_FS5_contig_1833	protein SUPPRESSOR OF npr1-1, CONSTITUTIVE 1-like isoform X1	1.4837e-21	K19613
SPF_FS5_contig_1834	ATP-binding cassette sub-family F member 1	0	K06184
SPF_FS5_contig_1835	S-formylglutathione hydrolase	3.50373e-140	K01070
SPF_FS5_contig_1838	adenylyl cyclase-associated protein 1	2.94702e-75	K17261
SPF_FS5_contig_1842	predicted protein	4.2145e-72	K16506
SPF_FS5_contig_1844	alanine--glyoxylate aminotransferase 2, mitochondrial isoform X2	0	K00827
SPF_FS5_contig_1845	fibroblast growth factor receptor homolog 1 isoform X2	7.07145e-145
SPF_FS5_contig_1846	DBH-like monooxygenase protein 1	4.58807e-99	K00503
SPF_FS5_contig_1847	sorting nexin-6	1.63155e-174	K17920
SPF_FS5_contig_1848	methylglutaconyl-CoA hydratase, mitochondrial	1.03837e-109	K05607
SPF_FS5_contig_1851	baculoviral IAP repeat-containing protein 3-like	2.7949e-34	K16060
SPF_FS5_contig_1852	baculoviral IAP repeat-containing protein 7-like	8.11647e-20	K16060
SPF_FS5_contig_1853	sarcosine dehydrogenase, mitochondrial	0	K00314
SPF_FS5_contig_1855	cytochrome c oxidase subunit NDUFA4	1.27072e-20	K03948
SPF_FS5_contig_1857	bromodomain adjacent to zinc finger domain protein 2B	4.70237e-108
SPF_FS5_contig_1858	tripeptidyl-peptidase 2 isoform X2	0	K01280
SPF_FS5_contig_1859	uncharacterized protein LOC106163538	1.1239e-141
SPF_FS5_contig_1860	uncharacterized protein LOC106163538	1.49917e-76
SPF_FS5_contig_1862	Ubiquitin conjugation factor E4 B	0	K10597
SPF_FS5_contig_1865	something about silencing protein 10	1.92976e-98	K14767
SPF_FS5_contig_1866	protein polyglycylase TTLL10 isoform X5	0	K23628
SPF_FS5_contig_1867	60 kDa neurofilament protein	1.30565e-99	K18585
SPF_FS5_contig_1869	monocarboxylate transporter 9	2.61198e-18	K08187
SPF_FS5_contig_1871	MAP kinase-activating death domain protein-like isoform X1	2.46413e-149
SPF_FS5_contig_1872	40S ribosomal protein S21	7.97297e-44	K02971
SPF_FS5_contig_1873	elongation factor 1-gamma, putative	1.10603e-31	K03233
SPF_FS5_contig_1877	succinate--CoA ligase [GDP-forming] subunit beta, mitochondrial-like isoform X1	4.12765e-178	K01900
SPF_FS5_contig_1879	pyruvate carboxylase, mitochondrial-like isoform X1	0	K01958
SPF_FS5_contig_1887	calcium-binding protein	7.15972e-09
SPF_FS5_contig_1890	cytochrome P450 2C15-like	1.15154e-109
SPF_FS5_contig_1892	zinc finger protein 462-like	1.18148e-54
SPF_FS5_contig_1894	atrial natriuretic peptide receptor 2-like	0	K12324
SPF_FS5_contig_1895	aminomethyltransferase, mitochondrial	3.4224e-164	K00605
SPF_FS5_contig_1896	suppressor of tumorigenicity 14 protein isoform X2	8.06316e-34	K20053
SPF_FS5_contig_1897	suppressor of tumorigenicity 14 protein	8.93195e-34	K20053
SPF_FS5_contig_1898	uncharacterized protein LOC106171209	5.39893e-20
SPF_FS5_contig_1899	N-acetyllactosaminide beta-1,6-N-acetylglucosaminyl-transferase-like	7.8725e-71	K09662
SPF_FS5_contig_1901	survival of motor neuron-related-splicing factor 30	3.78206e-60	K12839
SPF_FS5_contig_1903	riboflavin kinase	9.84342e-48	K00861
SPF_FS5_contig_1904	cathepsin L1-like	5.9245e-93	K01365
SPF_FS5_contig_1905	bcl-2-like protein 2	1.75603e-38	K04570
SPF_FS5_contig_1906	dual specificity protein kinase CLK2 isoform X4	3.77706e-172	K08823
SPF_FS5_contig_1907	tubulin monoglycylase TTLL3-like isoform X5	0	K16608
SPF_FS5_contig_1909	very long-chain acyl-CoA synthetase-like	7.10338e-168	K08745
SPF_FS5_contig_1910	src substrate cortactin-like isoform X1	6.42723e-132	K06106
SPF_FS5_contig_1911	vesicle transport protein SFT2B	2.46578e-53
SPF_FS5_contig_1916	ruvB-like 1	4.75995e-22	K04499
SPF_FS5_contig_1917	ubiquitin-60S ribosomal protein L40	2.85647e-84	K02927
SPF_FS5_contig_1919	exportin-1 isoform X1	9.14703e-22	K14290
SPF_FS5_contig_1920	tetraspanin-3-like	1.88853e-45	K17293
SPF_FS5_contig_1921	probable D-lactate dehydrogenase, mitochondrial isoform X2	7.22431e-132	K00102
SPF_FS5_contig_1922	solute carrier family 25 member 39 isoform X2	6.92598e-109	K15119
SPF_FS5_contig_1924	tetraspanin	2.60029e-05
SPF_FS5_contig_1925	cytochrome P450 10-like	6.58116e-115	K17951
SPF_FS5_contig_1926	reverse transcriptase-like protein	2.16642e-19
SPF_FS5_contig_1928	putative RNA-directed DNA polymerase from transposon BS	1.01482e-11	K22754
SPF_FS5_contig_1929	TSC22 domain family protein 1	5.7901e-20
SPF_FS5_contig_1930	sphingomyelin phosphodiesterase isoform X1	0	K12350
SPF_FS5_contig_1931	cubilin	3.14103e-32	K14616
SPF_FS5_contig_1937	patatin-like phospholipase domain-containing protein 4 isoform X1	1.5668e-30	K11157
SPF_FS5_contig_1938	methionine synthase reductase isoform X1	2.07386e-118	K00597
SPF_FS5_contig_1939	cytochrome P450 3A24-like	3.31633e-92	K07424
SPF_FS5_contig_1941	activator of 90 kDa heat shock protein ATPase homolog 1-like	5.62323e-115
SPF_FS5_contig_1945	Golgi-associated plant pathogenesis-related protein 1-like	2.35538e-51
SPF_FS5_contig_1947	myosin-VIIa-like isoform X2	0	K10359
SPF_FS5_contig_1949	Ubiquitin-conjugating enzyme E2 C	5.83483e-71	K06688
SPF_FS5_contig_1950	glycerol kinase-like isoform X2	0	K00864
SPF_FS5_contig_1953	proliferation-associated protein 2G4	1.5627e-178
SPF_FS5_contig_1958	apolipoprotein D-like	8.57905e-32	K03098
SPF_FS5_contig_1960	probable ATP-dependent RNA helicase DHX58	2.62111e-115	K12646
SPF_FS5_contig_1961	UV excision repair protein RAD23 homolog B	1.46119e-37	K10839
SPF_FS5_contig_1962	cyclin-dependent kinase 11B-like	0	K08818
SPF_FS5_contig_1964	endoplasmic reticulum-Golgi intermediate compartment protein 3 isoform X2	0	K20367
SPF_FS5_contig_1965	ornithine decarboxylase-like	3.89505e-12	K01581
SPF_FS5_contig_1966	probable ATP-dependent RNA helicase DDX17 isoform X2	0	K12823
SPF_FS5_contig_1967	charged multivesicular body protein 4b	2.89318e-78	K12194
SPF_FS5_contig_1972	calcium-activated potassium channel slowpoke-like isoform X3	0	K04936
SPF_FS5_contig_1975	glycylpeptide N-tetradecanoyltransferase 2-like	0	K00671
SPF_FS5_contig_1977	cytochrome b5 isoform X1	6.71123e-28	K23490
SPF_FS5_contig_1981	organic cation transporter protein	6.61644e-76	K08202
SPF_FS5_contig_1982	1,5-anhydro-D-fructose reductase	7.66728e-86	K00002
SPF_FS5_contig_1983	myophilin	5.95901e-66	K20526
SPF_FS5_contig_1984	importin-11	1.20216e-107
SPF_FS5_contig_1988	actin-related protein 2/3 complex subunit 1A	5.57687e-169	K05757
SPF_FS5_contig_1989	NADH:ubiquinone oxidoreductase, NDUFB6/B17 subunit	8.25327e-46	K03962
SPF_FS5_contig_1990	methylcrotonoyl-CoA carboxylase subunit alpha, mitochondrial	0	K01968
SPF_FS5_contig_1995	Disrupted in renal carcinoma protein 2-like	1.57996e-49	K15381
SPF_FS5_contig_1997	transcriptional repressor protein YY1-like isoform X3	1.60916e-163	K09201
SPF_FS5_contig_2000	very-long-chain 3-oxoacyl-CoA reductase	2.57175e-16	K10251
SPF_FS5_contig_2001	GPI ethanolamine phosphate transferase 1 isoform X1	8.42618e-170	K13100
SPF_FS5_contig_2002	non-specific lipid-transfer protein	0	K08764
SPF_FS5_contig_2004	cytochrome P450 2J2-like isoform X1	1.16849e-103	K07418
SPF_FS5_contig_2005	oxysterol-binding protein-related protein 9-like isoform X2	2.85549e-170	K20465
SPF_FS5_contig_2006	frizzled-1-like	0	K02432
SPF_FS5_contig_2007	early growth response protein 2-like	1.25756e-65	K09203
SPF_FS5_contig_2008	transcription factor SoxB2	1.17816e-55	K09267
SPF_FS5_contig_2009	dynamin-1-like protein	0	K17065
SPF_FS5_contig_2011	AP-3 complex subunit delta-1-like isoform X2	0	K12396
SPF_FS5_contig_2012	selenide, water dikinase	0	K01008
SPF_FS5_contig_2015	receptor-type tyrosine-protein phosphatase kappa-like	1.06391e-131	K05695
SPF_FS5_contig_2017	ras-related protein Rab-1A	1.61667e-125	K07874
SPF_FS5_contig_2019	ras-related protein Rab-11A	2.43349e-108	K07904
SPF_FS5_contig_2020	neurogenic locus Notch protein	0	K02599
SPF_FS5_contig_2021	Methionine adenosyltransferase 2 subunit beta	1.73166e-52	K00789
SPF_FS5_contig_2023	Src kinase-associated phosphoprotein 2-A	5.03861e-21	K23471
SPF_FS5_contig_2024	neurexin-4-like	0
SPF_FS5_contig_2026	serine/threonine-protein phosphatase 2A 56 kDa regulatory subunit alpha isoform-like	0	K11584
SPF_FS5_contig_2030	60S ribosomal protein L14	5.6509e-67	K02875
SPF_FS5_contig_2032	MAP/microtubule affinity-regulating kinase 3-like isoform X2	0	K08798
SPF_FS5_contig_2033	Tyramine beta-hydroxylase	1.84916e-24	K00503
SPF_FS5_contig_2036	mitochondrial ATP synthase subunit beta precursor	4.71431e-150	K02133
SPF_FS5_contig_2037	heterogeneous nuclear ribonucleoprotein H	1.52655e-105	K12898
SPF_FS5_contig_2043	xanthine dehydrogenase/oxidase	0	K00106
SPF_FS5_contig_2045	organic solute transporter subunit alpha-like	1.68643e-34	K14360
SPF_FS5_contig_2046	Sortilin-related receptor	0
SPF_FS5_contig_2047	CD82 antigen-like	2.09262e-47	K17353
SPF_FS5_contig_2048	tripartite motif-containing protein 2-like	1.44848e-08	K12026
SPF_FS5_contig_2049	gastrula zinc finger protein XlCGF57.1-like	5.01154e-105	K09228
SPF_FS5_contig_2050	gastrula zinc finger protein XlCGF8.2DB-like	1.46972e-30	K09228
SPF_FS5_contig_2052	actin filament-associated protein 1 isoform X1	1.04939e-12	K18616
SPF_FS5_contig_2053	helicase domino-like isoform X2	0
SPF_FS5_contig_2058	CCR4-NOT transcription complex subunit 4-like	2.67574e-127	K10643
SPF_FS5_contig_2059	uncharacterized protein LOC110452822	7.93134e-55
SPF_FS5_contig_2061	60S ribosomal protein L38	6.19025e-36	K02923
SPF_FS5_contig_2063	long-chain-fatty-acid--CoA ligase ACSBG2-like	0	K15013
SPF_FS5_contig_2064	T-complex protein 1 subunit gamma-like	0	K09495
SPF_FS5_contig_2066	allograft inflammatory factor 1	5.97545e-51	K18617
SPF_FS5_contig_2067	solute carrier family 35 member F6-like	4.24215e-130
SPF_FS5_contig_2071	balbiani ring protein 3	4.28182e-05
SPF_FS5_contig_2072	quinone oxidoreductase	9.07141e-112	K00344
SPF_FS5_contig_2075	trichohyalin isoform X7	7.30995e-22	K06084
SPF_FS5_contig_2076	double-stranded RNA-specific editase 1	1.5126e-60	K13194
SPF_FS5_contig_2079	magnesium transporter NIPA2 isoform X3	1.1376e-111	K22733
SPF_FS5_contig_2081	asparagine synthetase [glutamine-hydrolyzing]-like	0	K01953
SPF_FS5_contig_2082	ragulator complex protein LAMTOR4 homolog	1.78787e-09	K20399
SPF_FS5_contig_2083	ras and EF-hand domain-containing protein homolog isoform X4	6.12534e-64	K17199
SPF_FS5_contig_2084	monocarboxylate transporter 12-like isoform X1	5.89514e-53	K00942
SPF_FS5_contig_2085	putative ascorbate peroxidase	1.18123e-40	K00428
SPF_FS5_contig_2086	signal recognition particle receptor subunit alpha homolog isoform X2	0	K13431
SPF_FS5_contig_2087	low-density lipoprotein receptor-related protein 4-like	5.92522e-105	K20051
SPF_FS5_contig_2088	MOB kinase activator-like 1	1.56667e-134	K06685
SPF_FS5_contig_2089	protein sel-1 homolog 1-like isoform X1	0	K14026
SPF_FS5_contig_2090	protein sprouty homolog 2-like	4.93349e-23	K17383
SPF_FS5_contig_2091	putative ferric-chelate reductase 1	2.0373e-33
SPF_FS5_contig_2092	elongation factor EF-2	1.48511e-87	K03234
SPF_FS5_contig_2093	sequestosome-1-like isoform X1	4.44523e-17	K14381
SPF_FS5_contig_2094	MAP kinase-activated protein kinase 2	1.82017e-173	K04443
SPF_FS5_contig_2096	glutathione S-transferase 4-like	1.29356e-45	K04097
SPF_FS5_contig_2098	cysteine-rich protein 1	1.01066e-39
SPF_FS5_contig_2099	nose resistant to fluoxetine protein 6-like	1.801e-133
SPF_FS5_contig_2101	cytosolic Fe-S cluster assembly factor nubp1	6.54274e-160
SPF_FS5_contig_2103	DNA replication licensing factor MCM3	0	K02541
SPF_FS5_contig_2106	GTP-binding protein REM 1	1.53448e-36
SPF_FS5_contig_2107	ectonucleotide pyrophosphatase/phosphodiesterase family member 5	1.00587e-105	K18398
SPF_FS5_contig_2108	Mitoferrin-2	2.35515e-124	K15113
SPF_FS5_contig_2110	hematopoietic prostaglandin D synthase	6.04265e-07
SPF_FS5_contig_2111	polycystic kidney disease 2-like 1 protein isoform X1	9.29224e-165	K04986
SPF_FS5_contig_2112	polycystic kidney disease 2-like 1 protein isoform X1	2.97833e-63	K04986
SPF_FS5_contig_2116	Receptor-interacting serine/threonine-protein kinase 1	1.33306e-21	K04427
SPF_FS5_contig_2117	suppressor of tumorigenicity 14 protein homolog	2.22023e-97	K01362
SPF_FS5_contig_2119	troponin i	9.88115e-53
SPF_FS5_contig_2120	protein dachsous-like	0	K16507
SPF_FS5_contig_2122	lactose-binding lectin l-2-like	8.98469e-35	K06560
SPF_FS5_contig_2124	AMP deaminase 2-like isoform X6	0	K01490
SPF_FS5_contig_2128	potassium voltage-gated channel protein Shaw-like	1.1205e-44	K04887
SPF_FS5_contig_2129	ribose-phosphate pyrophosphokinase	6.98953e-31	K00948
SPF_FS5_contig_2130	hepatocyte growth factor-regulated tyrosine kinase substrate-like isoform X2	4.1061e-164	K12182
SPF_FS5_contig_2131	trifunctional enzyme subunit beta, mitochondrial	0	K07509
SPF_FS5_contig_2133	40S ribosomal protein S10-like	4.49223e-53	K02947
SPF_FS5_contig_2138	sperm-associated antigen 6	0
SPF_FS5_contig_2139	Apoptogenic protein 1, mitochondrial	2.23695e-09	K23506
SPF_FS5_contig_2141	transient receptor potential cation channel subfamily M member 2 isoform X1	0	K04978
SPF_FS5_contig_2143	E3 ubiquitin-protein ligase MARCH1 isoform X2	1.1451e-76	K10656
SPF_FS5_contig_2145	receptor-type tyrosine-protein phosphatase F-like isoform X2	2.8782e-05
SPF_FS5_contig_2147	GTP-binding protein SAR1	2.08761e-105	K07953
SPF_FS5_contig_2149	growth arrest and DNA damage-inducible protein GADD45 alpha	8.13287e-22	K04402
SPF_FS5_contig_2151	sodium- and chloride-dependent creatine transporter 1-like	0	K05041
SPF_FS5_contig_2152	receptor-type tyrosine-protein phosphatase O	2.42818e-83	K05694
SPF_FS5_contig_2154	solute carrier family 13 member 5-like	9.37043e-122	K14445
SPF_FS5_contig_2155	enhancer of polycomb homolog 1-like	0	K11322
SPF_FS5_contig_2156	hydroxymethylglutaryl-CoA lyase, mitochondrial	5.36069e-149	K01640
SPF_FS5_contig_2157	cartilage matrix protein-like isoform X2	5.04152e-31	K06238
SPF_FS5_contig_2159	hepatocyte nuclear factor 4	0	K08704
SPF_FS5_contig_2160	RUN domain-containing protein 3A isoform X5	7.66731e-56
SPF_FS5_contig_2161	putative perlucin 8	2.27968e-08	K10059
SPF_FS5_contig_2163	lisH domain-containing protein ARMC9-like isoform X1	9.15271e-147	K22864
SPF_FS5_contig_2164	forkhead box protein P1 isoform X3	1.98036e-87	K09409
SPF_FS5_contig_2165	autophagy-related protein 9A	0	K17907
SPF_FS5_contig_2166	mitochondrial import receptor subunit TOM22 homolog	1.78423e-16	K17769
SPF_FS5_contig_2167	serine/threonine-protein phosphatase 2A catalytic subunit alpha isoform	0	K04382
SPF_FS5_contig_2168	PX domain-containing protein kinase-like protein isoform X2	1.1447e-155	K17543
SPF_FS5_contig_2169	NADH-ubiquinone oxidoreductase 75 kDa subunit, mitochondrial-like	0	K03934
SPF_FS5_contig_2174	putative aminopeptidase W07G4.4	0	K01255
SPF_FS5_contig_2177	nucleoside diphosphate kinase	9.89862e-78	K00940
SPF_FS5_contig_2178	vasodilator-stimulated phosphoprotein-like	4.29277e-42	K23487
SPF_FS5_contig_2179	gastrula zinc finger protein XlCGF8.2DB-like	1.5836e-87	K09228
SPF_FS5_contig_2180	E3 ubiquitin-protein ligase CHIP-like	1.18185e-123	K09561
SPF_FS5_contig_2183	predicted protein	6.01846e-66
SPF_FS5_contig_2184	DNA primase large subunit	2.45166e-135	K02685
SPF_FS5_contig_2187	ADP-dependent glucokinase-like	2.91603e-111	K08074
SPF_FS5_contig_2188	protein YIPF5-like	4.30251e-86	K20363
SPF_FS5_contig_2189	invertebrate-type lysozyme	3.86543e-39
SPF_FS5_contig_2190	amyloid beta A4 protein-like	3.4851e-80	K04520
SPF_FS5_contig_2191	histone H2A.V	6.17468e-62	K11251
SPF_FS5_contig_2193	scaffold attachment factor B1-like	2.36579e-36
SPF_FS5_contig_2194	exportin-T-like isoform X1	0	K14288
SPF_FS5_contig_2196	aspartyl aminopeptidase	0	K01267
SPF_FS5_contig_2197	hypothetical protein LOTGIDRAFT_233807	2.43818e-09
SPF_FS5_contig_2198	leucine-rich repeat and death domain-containing protein 1-like	3.67979e-51
SPF_FS5_contig_2200	Angiogenic factor with G patch and FHA domains 1	1.32959e-27
SPF_FS5_contig_2202	betaine--homocysteine S-methyltransferase 1	0	K00544
SPF_FS5_contig_2205	peptidyl-prolyl cis-trans isomerase CWC27 homolog	2.22401e-131	K12737
SPF_FS5_contig_2206	coatomer subunit beta	0	K17301
SPF_FS5_contig_2207	breast cancer metastasis-suppressor 1-like protein	1.06374e-77	K19196
SPF_FS5_contig_2208	suppressor of tumorigenicity 14 protein homolog	1.98234e-34	K20053
SPF_FS5_contig_2209	receptor-interacting serine/threonine-protein kinase 3	2.37639e-27	K04422
SPF_FS5_contig_2211	protein yippee-like 1	5.97548e-68
SPF_FS5_contig_2215	26S protease regulatory subunit 7	0	K03061
SPF_FS5_contig_2216	protein henna	0	K00500
SPF_FS5_contig_2217	GRIP and coiled-coil domain-containing protein 1-like	8.69049e-76	K20281
SPF_FS5_contig_2218	growth factor receptor-bound protein 2	3.55632e-87	K04364
SPF_FS5_contig_2219	glycine dehydrogenase (decarboxylating), mitochondrial	0	K00281
SPF_FS5_contig_2220	short-chain specific acyl-CoA dehydrogenase, mitochondrial	1.76192e-169	K00248
SPF_FS5_contig_2221	5-hydroxytryptamine receptor 4-like	1.11782e-37	K04160
SPF_FS5_contig_2222	tetraspanin-5 isoform X2	7.67083e-103	K17345
SPF_FS5_contig_2223	calpain-B-like isoform X2	2.51186e-133	K08585
SPF_FS5_contig_2224	hypothetical protein YQE_06077, partial	1.93722e-09
SPF_FS5_contig_2225	structural maintenance of chromosomes protein 1A-like	0	K06636
SPF_FS5_contig_2226	15-hydroxyprostaglandin dehydrogenase [NAD(+)] isoform X1	4.39719e-63	K00069
SPF_FS5_contig_2228	hsc70-interacting protein	1.73354e-62	K09560
SPF_FS5_contig_2230	26S proteasome non-ATPase regulatory subunit 13	8.60391e-152	K03039
SPF_FS5_contig_2235	beta-N-acetylglucosaminidase	0	K12373
SPF_FS5_contig_2236	ras GTPase-activating protein nGAP isoform X6	8.21482e-159
SPF_FS5_contig_2238	T-cell immunomodulatory protein	3.13332e-100	K17257
SPF_FS5_contig_2239	cyclin-K-like isoform X1	6.73126e-133	K23326
SPF_FS5_contig_2241	serine/threonine-protein kinase SIK2	0	K16311
SPF_FS5_contig_2244	E3 ubiquitin-protein ligase DTX3L-like	1.62694e-46	K06058
SPF_FS5_contig_2245	phenylalanine--tRNA ligase alpha subunit	0	K01889
SPF_FS5_contig_2246	protein rolling stone-like	1.35934e-09
SPF_FS5_contig_2248	calcyphosin-2-like isoform X2	3.61154e-122
SPF_FS5_contig_2249	tripeptidyl peptidase	8.21144e-90	K01279
SPF_FS5_contig_2251	LARGE xylosyl- and glucuronyltransferase 1-like	5.92166e-126	K09668
SPF_FS5_contig_2253	tripartite motif-containing protein 45-like isoform X4	8.3446e-130	K12026
SPF_FS5_contig_2254	polycystic kidney disease protein 1-like 2	0
SPF_FS5_contig_2256	actin-related protein 2/3 complex subunit 2	5.44545e-167	K05758
SPF_FS5_contig_2257	poly(A)-specific ribonuclease PARN isoform X1	2.53503e-130	K01148
SPF_FS5_contig_2261	antistasin-like isoform X1	4.17339e-11	K23637
SPF_FS5_contig_2262	predicted protein	2.76835e-23
SPF_FS5_contig_2263	predicted protein	1.67899e-33
SPF_FS5_contig_2264	putative glutamate synthase [NADPH] isoform X1	0
SPF_FS5_contig_2268	Y+L amino acid transporter 2	2.16099e-152
SPF_FS5_contig_2270	glycosylphosphatidylinositol anchor attachment 1 protein	5.14811e-126	K05289
SPF_FS5_contig_2271	nitrogen permease regulator 2-like protein	1.25668e-126	K20405
SPF_FS5_contig_2272	Peptide-N4-N-acetyl-beta-D-glucosaminylasparagine amidase F precursor	1.47419e-167
SPF_FS5_contig_2273	DBH-like monooxygenase protein 1	5.73098e-10	K00503
SPF_FS5_contig_2274	Protocadherin-11 X-linked	1.23436e-104	K16498
SPF_FS5_contig_2275	protein FAM43A	2.65545e-45
SPF_FS5_contig_2277	DNA polymerase alpha catalytic subunit-like	0	K02320
SPF_FS5_contig_2278	putative L-aspartate dehydrogenase	1.17523e-111	K06989
SPF_FS5_contig_2279	tyrosine-protein phosphatase non-receptor type 9-like isoform X2	9.0143e-113
SPF_FS5_contig_2280	insulin-like growth factor-binding protein complex acid labile subunit	2.04951e-48	K05401
SPF_FS5_contig_2281	WASH complex subunit 2C-like	1.09948e-62
SPF_FS5_contig_2283	elongation factor 1-alpha	0	K03231
SPF_FS5_contig_2284	ubiquitin-like protein FUBI	3.49528e-44	K02983
SPF_FS5_contig_2286	neuroglian-like isoform X1	0	K06756
SPF_FS5_contig_2287	inactive phospholipase C-like protein 2	0	K15370
SPF_FS5_contig_2288	sugar transporter SWEET1	1.83531e-26	K15382
SPF_FS5_contig_2289	ATP synthase subunit beta, mitochondrial	1.6575e-44	K02133
SPF_FS5_contig_2290	nucleoporin p58/p45-like isoform X3	4.09825e-63	K14307
SPF_FS5_contig_2291	allene oxide synthase-lipoxygenase protein-like	2.36925e-141	K00461
SPF_FS5_contig_2292	isoaspartyl peptidase/L-asparaginase-like	2.41691e-22	K13051
SPF_FS5_contig_2294	protein IWS1 homolog	3.71233e-92	K17498
SPF_FS5_contig_2295	Translocon-associated protein subunit gamma	3.31601e-80	K13251
SPF_FS5_contig_2299	Retroviral aspartyl protease	3.01996e-08
SPF_FS5_contig_2300	osteoclast-stimulating factor 1-like	2.511e-86
SPF_FS5_contig_2301	platelet-activating factor acetylhydrolase	7.58616e-143	K01062
SPF_FS5_contig_2302	phosphatidylserine decarboxylase proenzyme, mitochondrial isoform X1	5.34297e-126	K01613
SPF_FS5_contig_2303	phosphatidate phosphatase LPIN3 isoform X1	4.54204e-136	K15728
SPF_FS5_contig_2305	exocyst complex component 3-like	0	K06110
SPF_FS5_contig_2306	myophilin-like	1.92722e-57	K20526
SPF_FS5_contig_2307	Adenylosuccinate synthetase	0	K01939
SPF_FS5_contig_2308	probable cation-transporting ATPase 13A3 isoform X2	0	K13526
SPF_FS5_contig_2309	Multiple epidermal growth factor-like domains 10	2.08554e-05
SPF_FS5_contig_2310	hypothetical protein LOTGIDRAFT_152844	2.9822e-43
SPF_FS5_contig_2311	mitochondrial carrier homolog 2-like	1.66022e-74	K17885
SPF_FS5_contig_2312	G-protein coupled receptor 158	0
SPF_FS5_contig_2313	Mitochondrial inner membrane protein	2.92426e-72	K17785
SPF_FS5_contig_2314	pancreatic triacylglycerol lipase-like	6.66937e-111	K14075
SPF_FS5_contig_2315	EGF-like repeat and discoidin I-like domain-containing protein 3	2.25642e-10
SPF_FS5_contig_2318	serine/threonine-protein kinase H1 homolog	2.26406e-151	K08808
SPF_FS5_contig_2319	mitochondrial-processing peptidase subunit beta	1.97839e-59	K17732
SPF_FS5_contig_2320	mitochondrial carnitine/acylcarnitine carrier protein	7.15613e-26	K15109
SPF_FS5_contig_2322	tubulin beta-4B chain	0	K07375
SPF_FS5_contig_2323	unconventional myosin-Ie	0	K10356
SPF_FS5_contig_2324	delta-like protein 4	8.59167e-06	K16506
SPF_FS5_contig_2326	TGF-beta receptor type-1 isoform X3	2.3364e-179	K04674
SPF_FS5_contig_2328	cellular retinoic acid-binding protein 1-like	3.43879e-22	K08753
SPF_FS5_contig_2330	mitochondrial-processing peptidase subunit beta	6.95525e-12	K17732
SPF_FS5_contig_2331	Mitochondrial-processing peptidase subunit beta	1.20737e-39	K17732
SPF_FS5_contig_2332	transport and Golgi organization protein 2 homolog isoform X2	7.46387e-46
SPF_FS5_contig_2333	membrane magnesium transporter 1	1.63862e-32	K23566
SPF_FS5_contig_2335	40S ribosomal protein S26	2.87273e-54	K02976
SPF_FS5_contig_2336	Kv channel-interacting protein 4-like isoform X2	2.15429e-81
SPF_FS5_contig_2338	cytochrome c oxidase subunit 4 isoform 1, mitochondrial-like	2.66517e-54	K02263
SPF_FS5_contig_2339	Brain protein I3	2.59289e-15
SPF_FS5_contig_2340	probable ATP-dependent RNA helicase DDX52	0	K14779
SPF_FS5_contig_2342	transmembrane protein 45B-like	1.35006e-52
SPF_FS5_contig_2343	transmembrane protein 45b-like protein	4.61776e-05
SPF_FS5_contig_2344	ADAM 17-like protease isoform X2	1.06823e-137	K06059
SPF_FS5_contig_2348	tyrosine-protein kinase SRK2-like isoform X2	0	K05703
SPF_FS5_contig_2349	hypothetical protein	2.80492e-17
SPF_FS5_contig_2350	REST corepressor 3-like isoform X1	1.1682e-120
SPF_FS5_contig_2351	G-protein coupled receptor Mth2	1.0058e-21	K04599
SPF_FS5_contig_2354	cilia- and flagella-associated protein 52	0
SPF_FS5_contig_2355	SH3 domain-binding protein 5-like	1.03619e-33
SPF_FS5_contig_2356	cilia- and flagella-associated protein 221-like isoform X1	1.0111e-153
SPF_FS5_contig_2358	cytochrome b-c1 complex subunit 8	7.17316e-34	K00418
SPF_FS5_contig_2359	suppressor of tumorigenicity 14 protein	8.50675e-18	K20053
SPF_FS5_contig_2360	plastin-2 isoform X2	0	K17336
SPF_FS5_contig_2361	golgin subfamily A member 3-like	8.43729e-36
SPF_FS5_contig_2363	Chitin synthase 6	0	K00698
SPF_FS5_contig_2366	rho GTPase-activating protein 21-like isoform X1	1.71637e-96	K20315
SPF_FS5_contig_2368	transmembrane protein 198-like	2.86116e-18
SPF_FS5_contig_2369	receptor-mediated endocytosis protein 6 homolog	8.17376e-117
SPF_FS5_contig_2370	caspase-3 isoform X2	4.15219e-29	K04397
SPF_FS5_contig_2372	ragulator complex protein LAMTOR1-like	2.58378e-17	K20397
SPF_FS5_contig_2374	MTSS1-like protein isoform X4	9.61493e-85	K20128
SPF_FS5_contig_2375	protein FAM210B-like isoform X1	2.00673e-60
SPF_FS5_contig_2378	glutathione S-transferase 1-like	3.32524e-13	K04097
SPF_FS5_contig_2381	ADP-ribosylation factor 1	1.21877e-106	K07937
SPF_FS5_contig_2383	patched domain-containing protein 3-like	0
SPF_FS5_contig_2384	required for meiotic nuclear division protein 1 homolog	2.08303e-78	K23499
SPF_FS5_contig_2385	anoctamin-4-like isoform X1	7.59834e-180	K19501
SPF_FS5_contig_2387	aldo-keto reductase family 1 member B10-like	9.87068e-94	K00002
SPF_FS5_contig_2389	ERO1-like protein beta isoform X1	3.83021e-164	K10976
SPF_FS5_contig_2390	ADP-ribosylation factor 6	6.27941e-120	K07941
SPF_FS5_contig_2394	Beta-hexosaminidase subunit beta	5.09651e-128	K12373
SPF_FS5_contig_2395	palmitoyltransferase ZDHHC9 isoform X4	9.92791e-118	K16675
SPF_FS5_contig_2396	cell division cycle 5-like protein	0	K12860
SPF_FS5_contig_2401	dynein heavy chain 6, axonemal-like isoform X1	0	K10408
SPF_FS5_contig_2402	glycogen phosphorylase	0	K00688
SPF_FS5_contig_2403	endo 1,4- beta D-glucanase 1	3.96543e-39
SPF_FS5_contig_2405	chondroitin proteoglycan-2-like	4.88422e-09
SPF_FS5_contig_2406	MLP/CRP family (Muscle LIM Protein/Cysteine-rich Protein)	3.56037e-09
SPF_FS5_contig_2408	mammalian ependymin-related protein 1-like	4.89032e-31
SPF_FS5_contig_2409	derlin-2 isoform X1	5.32924e-123	K13989
SPF_FS5_contig_2410	neuron navigator 2-like	1.46424e-150	K19483
SPF_FS5_contig_2411	chorion peroxidase-like	2.94629e-47	K19511
SPF_FS5_contig_2414	TNF receptor-associated factor 2-like	4.33249e-29	K03173
SPF_FS5_contig_2415	PC3-like endoprotease variant B	0	K01359
SPF_FS5_contig_2416	ceramide synthase 1	5.21164e-89	K04710
SPF_FS5_contig_2420	tubulin beta chain	0	K07375
SPF_FS5_contig_2421	tubulin beta-4B chain	0	K07375
SPF_FS5_contig_2423	SWI/SNF-related matrix-associated actin-dependent regulator of chromatin subfamily D member 1-like isoform X3	0	K11650
SPF_FS5_contig_2424	lysosomal Pro-X carboxypeptidase	6.68622e-177	K01285
SPF_FS5_contig_2428	eukaryotic translation initiation factor 4E-binding protein 2-like	2.0598e-30	K18644
SPF_FS5_contig_2429	DNA excision repair protein ERCC-8-like	7.01687e-74	K10570
SPF_FS5_contig_2430	tubulin alpha-1A chain-like	4.01688e-178	K07374
SPF_FS5_contig_2431	tubulin alpha-3 chain	4.54771e-178	K07374
SPF_FS5_contig_2434	alginate lyase	3.20743e-27	K01179
SPF_FS5_contig_2435	bcl2/adenovirus E1b 19-kD protein-interacting protein, putative	4.76021e-44	K18449
SPF_FS5_contig_2437	NADPH--cytochrome P450 reductase-like	0	K00327
SPF_FS5_contig_2440	sodium-coupled monocarboxylate transporter 1-like	4.43453e-174	K14388
SPF_FS5_contig_2441	NAD kinase 2, mitochondrial-like	2.07918e-134	K00858
SPF_FS5_contig_2444	fibrocystin-L	0
SPF_FS5_contig_2447	matrix metalloproteinase-14	6.17246e-64	K07763
SPF_FS5_contig_2449	vigilin-like	0
SPF_FS5_contig_2450	sequestosome-1-like isoform X1	4.96887e-44	K14381
SPF_FS5_contig_2452	amiloride-sensitive amine oxidase [copper-containing]	3.24009e-33	K11182
SPF_FS5_contig_2453	COP9 signalosome complex subunit 1	0	K12175
SPF_FS5_contig_2454	C2 domain-containing protein	1.37128e-40
SPF_FS5_contig_2455	RNA-binding protein PNO1	7.10969e-110	K11884
SPF_FS5_contig_2456	protein lifeguard 2-like	1.22479e-66	K06890
SPF_FS5_contig_2458	protein RRNAD1-like isoform X1	1.06285e-38
SPF_FS5_contig_2459	mucin-5AC-like isoform X1	1.97347e-119	K04459
SPF_FS5_contig_2460	xanthine dehydrogenase-like	1.03824e-51	K00106
SPF_FS5_contig_2462	malate dehydrogenase, mitochondrial-like	2.57665e-162	K00026
SPF_FS5_contig_2464	putative ammonium transporter 1	1.05058e-103	K03320
SPF_FS5_contig_2465	pre-mRNA-splicing regulator female-lethal(2)D isoform X2	2.74718e-41	K22824
SPF_FS5_contig_2466	Aldolase	0	K01623
SPF_FS5_contig_2467	protein Jade-1	0	K22156
SPF_FS5_contig_2471	very low-density lipoprotein receptor-like	6.79636e-127	K20053
SPF_FS5_contig_2472	actin-related protein 2/3 complex subunit 4	6.08816e-103	K05755
SPF_FS5_contig_2473	ribonuclease H1	4.10612e-52	K03469
SPF_FS5_contig_2475	aldose 1-epimerase	1.45737e-126	K01785
SPF_FS5_contig_2479	caspase-3	2.37849e-24	K04397
SPF_FS5_contig_2480	caspase-3-like isoform X2	1.54081e-19	K04397
SPF_FS5_contig_2481	sucrase-isomaltase, intestinal	0	K12047
SPF_FS5_contig_2486	cytoplasmic aconitate hydratase-like isoform X2	0	K01681
SPF_FS5_contig_2488	cilia- and flagella-associated protein 251-like	0
SPF_FS5_contig_2489	guanine nucleotide-binding protein G(i) subunit alpha isoform X2	0	K04630
SPF_FS5_contig_2490	creatine kinase, flagellar-like	0
SPF_FS5_contig_2491	adhesion G-protein coupled receptor D1-like isoform X2	1.18769e-70	K04592
SPF_FS5_contig_2492	peroxiredoxin-5, mitochondrial-like	1.38132e-76	K11187
SPF_FS5_contig_2493	protein amalgam-like	3.71764e-22	K06772
SPF_FS5_contig_2494	alginate lyase	2.44643e-34	K01179
SPF_FS5_contig_2495	translocon-associated protein subunit beta	7.5913e-69	K13250
SPF_FS5_contig_2496	40S ribosomal protein S28	1.70076e-24	K02979
SPF_FS5_contig_2500	receptor expression-enhancing protein 5-like isoform X2	3.69833e-17	K17279
SPF_FS5_contig_2501	cubilin isoform X1	0	K14616
SPF_FS5_contig_2503	solute carrier organic anion transporter family member 5A1	1.64941e-16	K14354
SPF_FS5_contig_2504	pancreatic triacylglycerol lipase	2.27565e-103	K14073
SPF_FS5_contig_2505	eukaryotic translation initiation factor 2 subunit 1	2.30247e-160	K03237
SPF_FS5_contig_2506	Nucleolar RNA helicase 2	0	K16911
SPF_FS5_contig_2507	heat shock 70 kDa protein 1-like	0	K03283
SPF_FS5_contig_2510	cyclin-dependent kinase 10	7.69999e-161	K02449
SPF_FS5_contig_2513	leucine--tRNA ligase, cytoplasmic	0	K01869
SPF_FS5_contig_2514	chromodomain-helicase-DNA-binding protein 1-like	0	K20092
SPF_FS5_contig_2515	bone morphogenetic protein receptor type-2	3.52498e-102	K04671
SPF_FS5_contig_2517	beta-1,3-glucan-binding protein-like	3.54322e-20
SPF_FS5_contig_2518	Max-like protein X	1.85454e-11	K09113
SPF_FS5_contig_2520	angiotensin-converting enzyme	0	K01283
SPF_FS5_contig_2521	histone H2A.V	1.31831e-61	K11251
SPF_FS5_contig_2522	NFU1 iron-sulfur cluster scaffold homolog, mitochondrial-like	8.81394e-83	K22074
SPF_FS5_contig_2523	uncharacterized protein LOC106166028	0
SPF_FS5_contig_2524	EF-hand domain-containing protein D2-like	6.39167e-67
SPF_FS5_contig_2526	Sodium- and chloride-dependent glycine transporter 2	0
SPF_FS5_contig_2527	polycystic kidney disease 2-like 1 protein	0	K04986
SPF_FS5_contig_2528	Peroxisome biogenesis factor 1	6.77358e-170	K13338
SPF_FS5_contig_2530	inorganic pyrophosphatase	3.32685e-120	K11726
SPF_FS5_contig_2531	Kunitz domain-containing protein, putative	2.41961e-15	K23624
SPF_FS5_contig_2535	78 kDa glucose-regulated protein	0	K09490
SPF_FS5_contig_2536	sequestosome-1 isoform X3	2.80204e-39	K14381
SPF_FS5_contig_2537	dystonin isoform X1	0	K10382
SPF_FS5_contig_2538	NUAK family SNF1-like kinase 1	2.23771e-129	K08800
SPF_FS5_contig_2540	UPF0693 protein C10orf32 homolog	1.97645e-21	K20821
SPF_FS5_contig_2543	potential E3 ubiquitin-protein ligase ariadne-1	0	K11968
SPF_FS5_contig_2544	poly [ADP-ribose] polymerase 14-like	8.90198e-20
SPF_FS5_contig_2545	poly [ADP-ribose] polymerase 14-like	1.15012e-52
SPF_FS5_contig_2546	poly [ADP-ribose] polymerase 14	1.60332e-24	K15261
SPF_FS5_contig_2547	poly [ADP-ribose] polymerase 14	3.31233e-20
SPF_FS5_contig_2548	propionyl-CoA carboxylase beta chain, mitochondrial	0	K01966
SPF_FS5_contig_2549	heat shock protein 70 B2-like	0	K03283
SPF_FS5_contig_2550	heat shock protein 70 B2-like	0	K03283
SPF_FS5_contig_2551	trifunctional enzyme subunit alpha, mitochondrial-like	0	K07515
SPF_FS5_contig_2553	septin-7-like isoform X3	0	K16944
SPF_FS5_contig_2557	pancreatic triacylglycerol lipase-like isoform X1	1.80395e-108	K14073
SPF_FS5_contig_2562	major facilitator superfamily domain-containing protein 12	5.56854e-113
SPF_FS5_contig_2564	transcription factor Sp3-like isoform X1	7.97424e-61	K09194
SPF_FS5_contig_2566	signal transducing adapter molecule 1-like	5.30105e-140	K04705
SPF_FS5_contig_2567	Protein lunapark	5.63783e-84	K23292
SPF_FS5_contig_2568	T-complex protein 1 subunit alpha-like	0	K09493
SPF_FS5_contig_2570	U3 small nucleolar RNA-associated protein 14 homolog A-like	3.74714e-90	K14567
SPF_FS5_contig_2571	eukaryotic translation initiation factor 3 subunit L-like	0	K15029
SPF_FS5_contig_2572	Lysosomal alpha-mannosidase	3.35571e-99	K12311
SPF_FS5_contig_2573	medium-chain specific acyl-CoA dehydrogenase, mitochondrial-like	0	K00249
SPF_FS5_contig_2574	FK506-binding protein 15	1.10573e-60	K17478
SPF_FS5_contig_2575	lysine-specific demethylase 7B-like	0	K11445
SPF_FS5_contig_2576	bromodomain adjacent to zinc finger domain protein 2B-like isoform X5	5.90324e-10
SPF_FS5_contig_2579	epidermal growth factor receptor-like isoform X1	0	K04361
SPF_FS5_contig_2580	4-coumarate--CoA ligase 1-like	5.04573e-151	K01904
SPF_FS5_contig_2581	nuclear pore membrane glycoprotein 210-like	0	K14314
SPF_FS5_contig_2582	leukocyte surface antigen CD53	3.79373e-15	K06497
SPF_FS5_contig_2583	normal mucosa of esophagus-specific gene 1 protein	2.64038e-16
SPF_FS5_contig_2590	60S ribosomal protein L21	3.93449e-71	K02889
SPF_FS5_contig_2594	tetraspanin-18-like	7.20113e-80	K17353
SPF_FS5_contig_2595	zinc finger ZZ-type and EF-hand domain-containing protein 1-like	0
SPF_FS5_contig_2596	prolyl 4-hydroxylase subunit alpha-1 isoform X1	4.55058e-157	K00472
SPF_FS5_contig_2601	DNA-directed RNA polymerase I subunit RPA2	0
SPF_FS5_contig_2602	lipoxygenase homology domain-containing protein 1-like	2.03043e-07	K00461
SPF_FS5_contig_2603	fas apoptotic inhibitory molecule 1	1.28326e-05
SPF_FS5_contig_2609	splicing factor 3B subunit 1-like isoform X2	0	K12828
SPF_FS5_contig_2610	mitochondria-eating protein-like isoform X2	1.38102e-103	K22257
SPF_FS5_contig_2611	transmembrane protein 97	1.12455e-40
SPF_FS5_contig_2614	IgGFc-binding protein-like	5.61933e-35
SPF_FS5_contig_2619	vascular endothelial growth factor receptor 1-like isoform X4	9.16518e-152	K05096
SPF_FS5_contig_2620	misshapen-like kinase 1 isoform X8	0	K08840
SPF_FS5_contig_2622	cytochrome c oxidase subunit 7A-related protein, mitochondrial-like	4.28107e-17	K02270
SPF_FS5_contig_2623	ribosomal protein 63, mitochondrial	3.08756e-14
SPF_FS5_contig_2624	sulfotransferase 1A1	6.94796e-42	K01025
SPF_FS5_contig_2625	RNA-directed DNA polymerase from mobile element jockey-like	3.30231e-21
SPF_FS5_contig_2626	vacuolar protein sorting-associated protein 13D-like isoform X1	0	K19527
SPF_FS5_contig_2628	peroxisomal multifunctional enzyme type 2	0	K12405
SPF_FS5_contig_2629	MAGUK p55 subfamily member 5	2.05953e-52	K06091
SPF_FS5_contig_2630	uncharacterized protein LOC106163538	0
SPF_FS5_contig_2632	alginate lyase	2.95435e-50
SPF_FS5_contig_2634	sarcalumenin isoform X2	0
SPF_FS5_contig_2637	pituitary tumor-transforming gene 1 protein-interacting protein-like	2.35634e-27
SPF_FS5_contig_2638	dopamine receptor 1-like	7.80919e-98	K04144
SPF_FS5_contig_2639	heterogeneous nuclear ribonucleoprotein U-like protein 1 isoform X1	1.22166e-126	K15047
SPF_FS5_contig_2641	cyclin-dependent kinase-like 2 isoform X1	0	K08824
SPF_FS5_contig_2644	alpha-2-macroglobulin 1	0
SPF_FS5_contig_2645	Methionine aminopeptidase 2	0	K01265
SPF_FS5_contig_2648	protein bark beetle-like isoform X1	0
SPF_FS5_contig_2650	organic cation transporter protein-like	2.65032e-99	K08202
SPF_FS5_contig_2653	baculoviral IAP repeat-containing protein 7-B-like isoform X4	1.59564e-11	K16061
SPF_FS5_contig_2656	chloride channel protein 2-like isoform X1	0	K05011
SPF_FS5_contig_2657	sodium-coupled monocarboxylate transporter 1-like	0	K14386
SPF_FS5_contig_2658	tubulointerstitial nephritis antigen-like	2.03573e-99
SPF_FS5_contig_2659	probable uridine-cytidine kinase isoform X2	1.01582e-82	K00876
SPF_FS5_contig_2662	Glutathionyl-hydroquinone reductase YqjG	2.96402e-150	K07393
SPF_FS5_contig_2663	peptidyl-prolyl cis-trans isomerase FKBP2	5.54896e-66	K09569
SPF_FS5_contig_2664	exocyst complex component 2-like	0	K17637
SPF_FS5_contig_2665	catenin beta-like	0	K02105
SPF_FS5_contig_2666	prosaposin isoform X2	3.20824e-11	K12382
SPF_FS5_contig_2668	UPF0562 protein C7orf55 homolog	1.71507e-21
SPF_FS5_contig_2669	60S ribosomal protein L39	3.42854e-20	K02924
SPF_FS5_contig_2670	DBH-like monooxygenase protein 1	3.81571e-50
SPF_FS5_contig_2674	predicted protein	5.27505e-06
SPF_FS5_contig_2675	RNA-directed DNA polymerase from mobile element jockey-like	1.0808e-18
SPF_FS5_contig_2676	Endoglucanase A	0	K01179
SPF_FS5_contig_2677	putative homeodomain transcription factor 2 isoform X1	7.52955e-98
SPF_FS5_contig_2678	N(G),N(G)-dimethylarginine dimethylaminohydrolase 1	1.02205e-96	K01482
SPF_FS5_contig_2679	nose resistant to fluoxetine protein 6	1.47614e-113
SPF_FS5_contig_2681	tubulin polyglutamylase TTLL11 isoform X1	4.92369e-129	K16604
SPF_FS5_contig_2683	cubilin	1.31482e-27	K14616
SPF_FS5_contig_2687	transitional endoplasmic reticulum ATPase	0	K13525
SPF_FS5_contig_2688	mantle protein 9	2.86572e-08	K23087
SPF_FS5_contig_2692	beta-1,3-galactosyltransferase 1-like	1.28533e-37	K07819
SPF_FS5_contig_2693	ubiquitin-conjugating enzyme E2 S-like	5.79449e-93	K10583
SPF_FS5_contig_2695	putative 28S ribosomal protein S18c, mitochondrial precursor	2.60814e-38	K02963
SPF_FS5_contig_2696	zinc finger CCCH domain-containing protein 10-like	1.47754e-06
SPF_FS5_contig_2697	choline kinase alpha isoform X2	1.3623e-35	K14156
SPF_FS5_contig_2699	kalirin isoform X11	3.66288e-40	K15048
SPF_FS5_contig_2703	cytochrome P450 3A6-like	1.00371e-85
SPF_FS5_contig_2704	protein N-lysine methyltransferase METTL21A	1.08983e-16	K21804
SPF_FS5_contig_2705	mediator of RNA polymerase II transcription subunit 15-like	8.84658e-32	K15157
SPF_FS5_contig_2706	chitinase domain-containing protein 1-like isoform X2	4.65957e-114	K17525
SPF_FS5_contig_2712	acyl-CoA dehydrogenase family member 11-like	0
SPF_FS5_contig_2713	Transmembrane 9 superfamily member 3	0	K17087
SPF_FS5_contig_2714	E3 ubiquitin-protein ligase HECTD1-like isoform X1	0
SPF_FS5_contig_2715	cytochrome P450 4V2	1.59144e-111	K07427
SPF_FS5_contig_2716	polypyrimidine tract-binding protein 2-like isoform X2	9.38649e-173	K13218
SPF_FS5_contig_2717	double-strand-break repair protein rad21 homolog isoform X2	4.35207e-153	K06670
SPF_FS5_contig_2719	synaptic vesicular amine transporter-like	1.19315e-180	K08155
SPF_FS5_contig_2720	sorting nexin-29-like	4.84916e-75	K17935
SPF_FS5_contig_2722	monocarboxylate transporter 12-B-like	3.03294e-28	K08187
SPF_FS5_contig_2723	neuronal calcium sensor 2	8.90894e-81
SPF_FS5_contig_2725	monoacylglycerol lipase ABHD12-like	4.2305e-94	K13704
SPF_FS5_contig_2726	dopamine N-acetyltransferase isoform X2	2.45601e-09
SPF_FS5_contig_2727	palmitoyl-protein thioesterase 1-like	9.58082e-144	K01074
SPF_FS5_contig_2729	predicted protein	5.88621e-11
SPF_FS5_contig_2732	NADH-cytochrome b5 reductase 3 isoform X2	2.48238e-125	K00326
SPF_FS5_contig_2733	serine/threonine-protein kinase MRCK alpha isoform X3	0	K16307
SPF_FS5_contig_2735	protein phosphatase 1B-like isoform X1	4.01002e-164	K04461
SPF_FS5_contig_2736	monocarboxylate transporter 12 isoform X1	1.24068e-61
SPF_FS5_contig_2744	Mitochondrial enolase superfamily member 1	0	K18334
SPF_FS5_contig_2745	protein C-ets-1-like isoform X2	1.38541e-60	K02678
SPF_FS5_contig_2748	eukaryotic translation initiation factor 2A	2.68664e-91	K15026
SPF_FS5_contig_2750	Kinesin-like protein KIF26A	4.00228e-96	K09876
SPF_FS5_contig_2751	la-related protein 4	1.84587e-72	K18763
SPF_FS5_contig_2752	E3 ubiquitin-protein ligase Smurf1-like isoform X3	7.7139e-07
SPF_FS5_contig_2753	GTP-binding protein	2.30444e-24
SPF_FS5_contig_2754	DNA repair protein RAD50	0
SPF_FS5_contig_2756	tyrosine-protein kinase Btk29A-like isoform X1	0
SPF_FS5_contig_2758	gastrula zinc finger protein XlCGF57.1-like	1.04388e-77	K09228
SPF_FS5_contig_2760	adenomatous polyposis coli protein	4.95804e-144	K02085
SPF_FS5_contig_2761	E3 ubiquitin-protein ligase MIR2	1.95197e-128
SPF_FS5_contig_2762	ubiquitin-conjugating enzyme E2-17 kDa	2.45651e-92	K06689
SPF_FS5_contig_2763	myosin heavy chain	3.19162e-94	K17751
SPF_FS5_contig_2764	syndecan isoform X2	9.14381e-05
SPF_FS5_contig_2765	4-hydroxy-2-oxoglutarate aldolase, mitochondrial-like	1.00795e-138	K18123
SPF_FS5_contig_2766	Plasminogen activator inhibitor 1 RNA-binding protein	3.1047e-27	K13199
SPF_FS5_contig_2767	selenoprotein F-like	3.29512e-47
SPF_FS5_contig_2768	fatty acid hydroxylase domain-containing protein 2-like	6.12422e-118	K22282
SPF_FS5_contig_2770	Solute carrier family 13 member 5	4.74e-38	K14445
SPF_FS5_contig_2772	filamin-A-like isoform X1	0	K04437
SPF_FS5_contig_2774	insulin-like receptor	0
SPF_FS5_contig_2775	protein lifeguard 2-like	4.90336e-63	K06890
SPF_FS5_contig_2776	RNA-binding protein 5-like	2.63312e-112	K13094
SPF_FS5_contig_2778	collagen alpha-1(XI) chain-like	1.64803e-70	K19721
SPF_FS5_contig_2780	mitochondrial ATP synthase subunit OSCP-like precursor	1.44842e-88	K02137
SPF_FS5_contig_2782	PREDICTED: uncharacterized protein LOC100213281 isoform X1	2.85382e-93
SPF_FS5_contig_2783	cytochrome P450 3A24-like	7.93578e-94	K07424
SPF_FS5_contig_2787	malignant fibrous histiocytoma-amplified sequence 1 homolog	3.91293e-20
SPF_FS5_contig_2788	malignant fibrous histiocytoma-amplified sequence 1 homolog	3.63038e-16
SPF_FS5_contig_2790	coadhesin-like isoform X6	4.75246e-67	K17341
SPF_FS5_contig_2791	pyruvate dehydrogenase phosphatase regulatory subunit, mitochondrial-like	0	K17509
SPF_FS5_contig_2793	PIN2/TERF1-interacting telomerase inhibitor 1	4.20522e-45	K11135
SPF_FS5_contig_2794	NAD(P)H:quinone oxidoreductase	3.14288e-60
SPF_FS5_contig_2795	actin-like protein	5.40124e-156	K18584
SPF_FS5_contig_2797	THO complex subunit 1	0	K12878
SPF_FS5_contig_2798	ribonuclease UK114	6.25657e-21	K09022
SPF_FS5_contig_2800	ubiquitin carboxyl-terminal hydrolase 3-like	1.98877e-95	K11986
SPF_FS5_contig_2801	nucleoside diphosphate kinase 7	1.27125e-157	K00940
SPF_FS5_contig_2803	predicted protein	0	K04079
SPF_FS5_contig_2804	EH domain-containing protein 1	0	K12483
SPF_FS5_contig_2805	alpha-aminoadipic semialdehyde synthase, mitochondrial-like	0	K14157
SPF_FS5_contig_2806	CUB and sushi domain-containing protein 3-like	2.61999e-09
SPF_FS5_contig_2811	ribosomal RNA processing protein 1 homolog A-like	4.69575e-79	K14849
SPF_FS5_contig_2814	Histone H3.3	5.20862e-86	K11253
SPF_FS5_contig_2816	coatomer subunit alpha isoform X2	0	K05236
SPF_FS5_contig_2817	40S ribosomal protein S12, mitochondrial	1.16661e-50	K02950
SPF_FS5_contig_2820	cysteine protease ATG4D	2.93741e-102	K08342
SPF_FS5_contig_2822	rab GDP dissociation inhibitor alpha	0	K17255
SPF_FS5_contig_2823	glutathione peroxidase 7	2.13346e-56	K00432
SPF_FS5_contig_2824	uncharacterized protein LOC106179632	2.41726e-20
SPF_FS5_contig_2825	acid sphingomyelinase-like phosphodiesterase 3b	1.57475e-122	K01128
SPF_FS5_contig_2826	TNF receptor-associated factor 3 isoform X1	2.66566e-123	K03174
SPF_FS5_contig_2827	mediator of RNA polymerase II transcription subunit 1-like isoform X1	2.19145e-93	K15144
SPF_FS5_contig_2832	Inositol oxygenase	2.70389e-128	K00469
SPF_FS5_contig_2835	Chitin synthase 3	3.39536e-32	K00698
SPF_FS5_contig_2836	RNA-directed DNA polymerase from mobile element jockey	1.02014e-35
SPF_FS5_contig_2837	synaptojanin-2-binding protein	9.93006e-34	K20057
SPF_FS5_contig_2841	probable aconitate hydratase, mitochondrial	9.91271e-53	K01681
SPF_FS5_contig_2842	eukaryotic translation initiation factor 3 subunit J-A-like	3.53247e-21	K03245
SPF_FS5_contig_2845	heat shock protein 90-1	1.81946e-140	K04079
SPF_FS5_contig_2846	ras-related protein Rab6	4.32636e-123	K07893
SPF_FS5_contig_2847	suppressor of tumorigenicity 14 protein homolog	1.42057e-122	K20111
SPF_FS5_contig_2849	RAD50-interacting protein 1	1.75935e-161	K20474
SPF_FS5_contig_2851	glycine N-methyltransferase	9.1113e-131	K00552
SPF_FS5_contig_2852	solute carrier family 35 member F6-like	2.64055e-125
SPF_FS5_contig_2853	4-hydroxybutyrate coenzyme A transferase-like	0
SPF_FS5_contig_2854	rap1 GTPase-activating protein 1-like isoform X7	1.79856e-112	K17700
SPF_FS5_contig_2855	ATP-citrate synthase isoform X1	0	K01648
SPF_FS5_contig_2856	E3 ubiquitin-protein ligase listerin	5.70573e-95	K22377
SPF_FS5_contig_2859	mitochondrial ornithine transporter 1-like	1.02937e-99	K15101
SPF_FS5_contig_2863	E3 ubiquitin-protein ligase MARCH6 isoform X1	0	K10661
SPF_FS5_contig_2864	spermine oxidase-like	4.29792e-27	K12259
SPF_FS5_contig_2865	RUN and FYVE domain-containing protein 2-like isoform X1	0
SPF_FS5_contig_2867	Small integral membrane protein 15	4.3303e-13
SPF_FS5_contig_2869	calcium-transporting ATPase sarcoplasmic/endoplasmic reticulum type-like isoform X7	0	K05853
SPF_FS5_contig_2873	metalloproteinase inhibitor 3	7.40564e-36	K22584
SPF_FS5_contig_2874	predicted protein	1.56651e-08
SPF_FS5_contig_2875	microtubule-actin cross-linking factor 1, isoforms 1/2/3/5-like	1.85317e-73	K10382
SPF_FS5_contig_2876	3-keto-steroid reductase	7.03374e-103	K13373
SPF_FS5_contig_2877	mRNA export factor-like	0	K14298
SPF_FS5_contig_2878	adiponectin receptor protein-like isoform X1	1.01944e-91	K07297
SPF_FS5_contig_2879	RNA-binding protein 39 isoform X2	0	K13091
SPF_FS5_contig_2880	short transient receptor potential channel 4-associated protein-like	0
SPF_FS5_contig_2881	malignant fibrous histiocytoma-amplified sequence 1 homolog	4.20087e-14
SPF_FS5_contig_2882	CUB domain-containing protein 2	3.40358e-15	K09608
SPF_FS5_contig_2883	secretory carrier-associated membrane protein 1 isoform X2	6.49909e-28	K19995
SPF_FS5_contig_2886	atrial natriuretic peptide-converting enzyme-like isoform X1	2.29161e-67	K09614
SPF_FS5_contig_2887	serine protease hepsin	1.27045e-120	K20111
SPF_FS5_contig_2888	cytochrome c	1.97946e-53	K08738
SPF_FS5_contig_2890	ras-related protein Rab-14	4.16357e-139	K07881
SPF_FS5_contig_2891	Integral membrane protein GPR137B	2.32594e-66	K22989
SPF_FS5_contig_2892	lisH domain and HEAT repeat-containing protein KIAA1468 homolog isoform X1	0
SPF_FS5_contig_2893	ergothioneine biosynthesis protein 1-like isoform X1	0
SPF_FS5_contig_2894	60S ribosomal protein L31	8.60672e-56	K02910
SPF_FS5_contig_2896	diacylglycerol kinase zeta isoform X6	0	K00901
SPF_FS5_contig_2897	probable methylmalonate-semialdehyde dehydrogenase [acylating], mitochondrial	0	K00140
SPF_FS5_contig_2898	alginate lyase	2.59177e-30
SPF_FS5_contig_2899	interferon-induced, double-stranded RNA-activated protein kinase	1.05086e-15	K02211
SPF_FS5_contig_2900	histone H1-delta	8.26788e-22	K11275
SPF_FS5_contig_2904	Tubulin alpha-1 chain	2.33783e-176	K07374
SPF_FS5_contig_2905	NC domain protein	1.01983e-10
SPF_FS5_contig_2908	selenoprotein M-like	7.30735e-20
SPF_FS5_contig_2912	oxysterol-binding protein 1-like	0
SPF_FS5_contig_2913	DNA polymerase epsilon catalytic subunit A	0	K02324
SPF_FS5_contig_2914	protein kinase C delta type-like isoform X1	0
SPF_FS5_contig_2915	TLC domain-containing protein 2	9.00145e-78
SPF_FS5_contig_2916	protein Wnt-5b-like	5.17605e-108	K00444
SPF_FS5_contig_2918	5-phosphohydroxy-L-lysine phospho-lyase-like isoform X1	2.92606e-162	K14286
SPF_FS5_contig_2919	WD repeat, SAM and U-box domain-containing protein 1 isoform X2	2.42989e-86
SPF_FS5_contig_2920	Beta-1,3-galactosyltransferase 5	5.50631e-33	K07819
SPF_FS5_contig_2922	tyrosine-protein kinase PR2-like isoform X1	1.31295e-151
SPF_FS5_contig_2923	putative RNA-directed DNA polymerase from mobile element jockey-like	3.78647e-07
SPF_FS5_contig_2924	ubiquitin C	0	K08770
SPF_FS5_contig_2928	solute carrier family 13 member 5-like	1.44451e-150	K14445
SPF_FS5_contig_2929	radixin isoform X1	0	K05762
SPF_FS5_contig_2930	mitogen-activated protein kinase kinase kinase 15 isoform X4	2.45166e-40
SPF_FS5_contig_2938	carbohydrate-responsive element-binding protein-like	1.17499e-95	K09113
SPF_FS5_contig_2939	betaine--homocysteine S-methyltransferase 1	1.04358e-68	K00544
SPF_FS5_contig_2940	MAM and LDL-receptor class A domain-containing protein 2-like	0
SPF_FS5_contig_2941	DNA polymerase epsilon subunit 2 isoform X1	0	K02325
SPF_FS5_contig_2942	collagen alpha-1(XXII) chain	5.90282e-08	K19721
SPF_FS5_contig_2943	heme peroxidase-like protein 1	8.02577e-28	K19511
SPF_FS5_contig_2944	pre-mRNA-splicing factor ISY1 homolog	1.06163e-129	K12870
SPF_FS5_contig_2945	60S ribosomal protein L35a	3.11168e-62	K02917
SPF_FS5_contig_2946	isoleucine--tRNA ligase, cytoplasmic-like	0	K01870
SPF_FS5_contig_2948	6-phosphogluconate dehydrogenase, decarboxylating	0	K00033
SPF_FS5_contig_2949	pentatricopeptide repeat-containing protein 2, mitochondrial-like	1.19662e-20	K17711
SPF_FS5_contig_2950	deleted in malignant brain tumors 1 protein isoform X2	1.95132e-54	K06545
SPF_FS5_contig_2952	pyruvate dehydrogenase [acetyl-transferring]-phosphatase 1, mitochondrial	2.46472e-129	K01102
SPF_FS5_contig_2957	endothelin-converting enzyme 1	0	K01415
SPF_FS5_contig_2958	tRNA (guanine(26)-N(2))-dimethyltransferase isoform X2	1.12486e-180	K00555
SPF_FS5_contig_2961	hydroxymethylglutaryl-CoA synthase, cytoplasmic isoform X1	0	K01641
SPF_FS5_contig_2963	receptor-interacting serine/threonine-protein kinase 1 isoform X1	6.75918e-27	K05111
SPF_FS5_contig_2964	laminin subunit alpha	0	K06240
SPF_FS5_contig_2965	protein AATF-like	6.94173e-58	K14782
SPF_FS5_contig_2966	talin-1-like isoform X1	0	K06271
SPF_FS5_contig_2970	YSIRK-type signal peptide-containing protein	5.35754e-07
SPF_FS5_contig_2971	NAD(P) transhydrogenase, mitochondrial-like	0	K00323
SPF_FS5_contig_2972	NADH-ubiquinone oxidoreductase 49 kDa subunit	0	K03935
SPF_FS5_contig_2973	40S ribosomal protein S19-like	3.20645e-67	K02966
SPF_FS5_contig_2974	cadherin-related tumor suppressor-like	2.04815e-05
SPF_FS5_contig_2975	extracellular tyrosine-protein kinase PKDCC-like	1.77325e-81	K17548
SPF_FS5_contig_2976	cytochrome P450	8.23643e-27	K07424
SPF_FS5_contig_2978	tubulointerstitial nephritis antigen	5.10006e-23	K01363
SPF_FS5_contig_2980	protein FAM134A	7.67634e-17	K23880
SPF_FS5_contig_2981	transmembrane protein 87A-like	8.29889e-112
SPF_FS5_contig_2985	kinesin-like protein KIF9 isoform X1	0	K10397
SPF_FS5_contig_2987	lectin L6-like isoform X3	5.90549e-45	K23881
SPF_FS5_contig_2990	nucleolar protein 58	0	K14565
SPF_FS5_contig_2992	transmembrane protein 222-like	3.44528e-78	K20726
SPF_FS5_contig_2993	60S ribosomal protein L24-like	1.03865e-65	K02896
SPF_FS5_contig_2994	integral membrane protein 2B-like	2.97692e-30	K18264
SPF_FS5_contig_2995	cytochrome P450 2D17	3.25957e-97	K00512
SPF_FS5_contig_2996	lactose-binding lectin l-2-like	1.07518e-26
SPF_FS5_contig_2997	IQ and AAA domain-containing protein 1 isoform X1	0
SPF_FS5_contig_3000	band 7 protein AGAP004871-like isoform X3	5.53366e-120	K17286
SPF_FS5_contig_3001	tyrosine-protein kinase CSK	8.9859e-149	K05728
SPF_FS5_contig_3004	TIR domain-containing protein	2.49402e-17	K10641
SPF_FS5_contig_3005	GTPase	2.8755e-27	K19613
SPF_FS5_contig_3008	T-complex protein 1 subunit eta isoform X5	1.1139e-62	K09499
SPF_FS5_contig_3010	tetraspanin-18-like	5.029e-34	K17353
SPF_FS5_contig_3011	Delta-1-pyrroline-5-carboxylate dehydrogenase, mitochondrial	0	K00294
SPF_FS5_contig_3012	transcription factor 25	3.36664e-152
SPF_FS5_contig_3013	ATP synthase subunit delta, mitochondrial-like	1.83573e-59	K02134
SPF_FS5_contig_3014	transcriptional activator Myb-like isoform X2	9.94483e-171	K09420
SPF_FS5_contig_3015	V-type proton ATPase subunit D	2.37078e-125	K02149
SPF_FS5_contig_3016	LON peptidase N-terminal domain and RING finger protein 3 isoform X3	2.5446e-160
SPF_FS5_contig_3017	sodium/calcium exchanger 3-like	0	K05849
SPF_FS5_contig_3018	hemocyte protein-glutamine gamma-glutamyltransferase-like isoform X1	0	K05619
SPF_FS5_contig_3019	sperm-associated antigen 17-like isoform X3	1.58521e-147
SPF_FS5_contig_3020	Serine/threonine-protein kinase ULK4	0	K17545
SPF_FS5_contig_3021	low-density lipoprotein receptor-related protein 6-like	5.63783e-81	K03068
SPF_FS5_contig_3022	low-density lipoprotein receptor-related protein 6 isoform X1	4.18996e-65	K03068
SPF_FS5_contig_3023	beta-1,3-glucan-binding protein-like	5.25256e-19
SPF_FS5_contig_3024	protein CREBRF homolog	1.22969e-26	K21554
SPF_FS5_contig_3030	Muscle M-line assembly protein unc-89	3.39301e-12	K12567
SPF_FS5_contig_3031	adhesion G-protein coupled receptor G6-like isoform X2	2.94098e-46	K08463
SPF_FS5_contig_3033	calnexin isoform X1	0	K08054
SPF_FS5_contig_3034	beta-1,4-N-acetylgalactosaminyltransferase bre-4-like isoform X1	2.24671e-85	K07966
SPF_FS5_contig_3037	E3 ubiquitin-protein ligase HECTD3-like	0	K12233
SPF_FS5_contig_3038	platelet-derived growth factor receptor-like protein	2.98788e-12	K05096
SPF_FS5_contig_3040	Lysine-specific demethylase 6A	0	K11447
SPF_FS5_contig_3042	phenazine biosynthesis-like domain-containing protein isoform X1	6.35884e-114
SPF_FS5_contig_3043	Golgi apparatus protein 1-like	0	K06816
SPF_FS5_contig_3044	dystrophin-like isoform X4	0
SPF_FS5_contig_3045	lysosomal protective protein	3.3768e-46	K13289
SPF_FS5_contig_3046	cytochrome P450 2J6	1.76565e-91	K07418
SPF_FS5_contig_3047	cystatin B	1.07711e-24	K13907
SPF_FS5_contig_3048	ribosome biogenesis protein NOP53-like isoform X1	3.05063e-71	K14840
SPF_FS5_contig_3050	receptor-type tyrosine-protein phosphatase N2-like	4.22986e-154	K07817
SPF_FS5_contig_3052	DBH-like monooxygenase protein 1	1.09887e-51	K00503
SPF_FS5_contig_3053	non-specific lipid-transfer protein-like	5.28877e-165	K08764
SPF_FS5_contig_3056	alcohol dehydrogenase class-3-like	0	K00121
SPF_FS5_contig_3057	alcohol dehydrogenase class-3	1.56326e-104	K00121
SPF_FS5_contig_3058	LIM zinc-binding domain-containing Nebulette-like isoform X7	1.32563e-05
SPF_FS5_contig_3059	CREB-regulated transcription coactivator 1-like	1.29714e-17	K15309
SPF_FS5_contig_3060	polycystic kidney disease protein 1-like 2	0
SPF_FS5_contig_3061	cysteine and glycine-rich protein 1-like	3.70806e-49	K09377
SPF_FS5_contig_3062	cytochrome P450 3A29	1.11496e-80	K01832
SPF_FS5_contig_3065	Sestrin-like protein	2.40673e-162	K10141
SPF_FS5_contig_3067	essential MCU regulator, mitochondrial	9.42915e-14	K22830
SPF_FS5_contig_3068	hypothetical protein LOTGIDRAFT_238638	1.69247e-05
SPF_FS5_contig_3070	protein disulfide-isomerase TMX3	2.11322e-20	K09585
SPF_FS5_contig_3071	E3 ubiquitin-protein ligase TRIM9-like isoform X1	1.35316e-172	K10649
SPF_FS5_contig_3078	kalirin isoform X1	1.36255e-20	K15048
SPF_FS5_contig_3079	b(0,+)-type amino acid transporter 1 isoform X2	5.69107e-52	K13868
SPF_FS5_contig_3080	AN1-type zinc finger protein 1	2.27229e-28
SPF_FS5_contig_3081	KAT8 regulatory NSL complex subunit 1	1.47583e-38	K18400
SPF_FS5_contig_3083	charged multivesicular body protein 1b-like	5.06162e-74	K12197
SPF_FS5_contig_3084	hypothetical protein D910_05941	1.02272e-20	K19511
SPF_FS5_contig_3086	chorion peroxidase-like	8.37577e-100	K19511
SPF_FS5_contig_3088	serine/threonine-protein kinase mTOR-like	0	K07203
SPF_FS5_contig_3089	sphingolipid delta(4)-desaturase DES1	1.03735e-165	K04712
SPF_FS5_contig_3090	cell cycle checkpoint control protein RAD9A-like isoform X1	3.82514e-90	K10994
SPF_FS5_contig_3091	gamma-glutamyltransferase 7	5.19976e-64	K18592
SPF_FS5_contig_3093	acidic leucine-rich nuclear phosphoprotein 32 family member A isoform X2	4.97119e-49	K18646
SPF_FS5_contig_3096	hypothetical protein DM860_017811	2.06711e-25
SPF_FS5_contig_3097	cytidine deaminase-like	6.60147e-29	K01489
SPF_FS5_contig_3098	tyrosine-protein kinase Abl-like isoform X1	0	K06619
SPF_FS5_contig_3099	golgin subfamily B member 1	5.62539e-27	K20478
SPF_FS5_contig_3101	arf-GAP with SH3 domain, ANK repeat and PH domain-containing protein 2-like isoform X2	0	K12488
SPF_FS5_contig_3103	betaine--homocysteine S-methyltransferase 1-like	1.46566e-151
SPF_FS5_contig_3104	nucleoside diphosphate kinase A	1.72942e-61	K00940
SPF_FS5_contig_3106	trichoplein keratin filament-binding protein-like	3.87201e-117	K16811
SPF_FS5_contig_3107	E3 ubiquitin-protein ligase TRIM37	0	K10608
SPF_FS5_contig_3109	ras-related protein Rab-11A	1.2271e-115	K07904
SPF_FS5_contig_3110	X-ray repair cross-complementing protein 5-like	0	K10884
SPF_FS5_contig_3112	probable prolyl 4-hydroxylase 10	8.28673e-162
SPF_FS5_contig_3114	Phytanoyl-CoA dioxygenase domain-containing protein 1	8.38432e-109
SPF_FS5_contig_3120	receptor-type tyrosine-protein phosphatase eta-like isoform X1	3.00045e-116	K05695
SPF_FS5_contig_3121	purinergic receptor P2X, ligand-gated ion channel, 4	1.58244e-128	K05218
SPF_FS5_contig_3122	oxysterol-binding protein-related protein 11 isoform X2	0	K20465
SPF_FS5_contig_3123	gamma-aminobutyric acid receptor-associated protein-like 2	2.26739e-66	K08341
SPF_FS5_contig_3124	apoptosis-enhancing nuclease	5.36867e-22	K18340
SPF_FS5_contig_3125	molecular chaperone DnaK	0	K04043
SPF_FS5_contig_3126	phospholipase B-like 1	0
SPF_FS5_contig_3127	39S ribosomal protein L47, mitochondrial	2.11695e-58	K17428
SPF_FS5_contig_3128	zinc finger protein castor homolog 1 isoform X1	0
SPF_FS5_contig_3129	trithorax group protein osa-like	1.71641e-28	K19041
SPF_FS5_contig_3131	Protein phosphatase inhibitor 2	3.33084e-19	K16833
SPF_FS5_contig_3132	uncharacterized protein LOC112556391 isoform X2	2.3662e-69
SPF_FS5_contig_3134	Protein phosphatase 1B	5.68724e-150	K04461
SPF_FS5_contig_3135	ATP-dependent RNA helicase DDX3X	3.06746e-23	K11594
SPF_FS5_contig_3136	ATP-dependent RNA helicase DDX3X	0	K11594
SPF_FS5_contig_3137	peroxisomal membrane protein PMP34-like	2.01254e-83	K13354
SPF_FS5_contig_3143	lactose-binding lectin l-2-like	2.39098e-30	K06560
SPF_FS5_contig_3145	nucleoporin NUP53-like	1.99401e-65	K14313
SPF_FS5_contig_3150	dyslexia-associated protein KIAA0319-like protein	8.78889e-20
SPF_FS5_contig_3151	pre-mRNA-splicing factor RBM22-like	4.30484e-179	K12872
SPF_FS5_contig_3153	twitchin isoform X7	0
SPF_FS5_contig_3154	cytoplasmic FMR1-interacting protein-like	0	K05749
SPF_FS5_contig_3155	villin-1-like isoform X1	0	K08017
SPF_FS5_contig_3160	ribosomal RNA small subunit methyltransferase NEP1	2.71299e-114	K14568
SPF_FS5_contig_3161	AN1-type zinc finger protein 5	5.17587e-15	K12163
SPF_FS5_contig_3163	1,5-anhydro-D-fructose reductase	9.96148e-95	K00002
SPF_FS5_contig_3165	putative RNA-directed DNA polymerase from transposon BS	8.04526e-55
SPF_FS5_contig_3167	probable leucine--tRNA ligase, mitochondrial isoform X2	0	K01869
SPF_FS5_contig_3171	synaptic vesicle membrane protein VAT-1 homolog	1.31186e-134	K23167
SPF_FS5_contig_3172	xanthine dehydrogenase-like	0	K00106
SPF_FS5_contig_3174	zinc finger bed domain-containing protein 1-like	1.21348e-12
SPF_FS5_contig_3175	muscleblind-like protein isoform X5	2.29275e-22	K14943
SPF_FS5_contig_3177	putative ascorbate peroxidase	6.15793e-37	K00428
SPF_FS5_contig_3178	putative ascorbate peroxidase	1.34376e-37	K00428
SPF_FS5_contig_3180	phospholipid scramblase 2-like isoform X1	2.37815e-115
SPF_FS5_contig_3181	tripartite motif-containing protein 2-like	1.14584e-09	K12026
SPF_FS5_contig_3183	calmodulin isoform X1	1.15504e-96	K02183
SPF_FS5_contig_3185	serine/threonine-protein phosphatase 2B catalytic subunit alpha isoform-like isoform X2	0	K04348
SPF_FS5_contig_3187	tripartite motif-containing protein 2-like	1.11056e-12	K12035
SPF_FS5_contig_3188	Neuronal calcium sensor 2	1.12911e-89
SPF_FS5_contig_3189	putative OPA3-like protein CG13603	1.85888e-34	K23166
SPF_FS5_contig_3190	E3 ubiquitin-protein ligase NEDD4 isoform X1	0	K10591
SPF_FS5_contig_3191	aconitate hydratase, mitochondrial-like	0	K01681
SPF_FS5_contig_3192	Transcriptional regulator ATRX	0	K10779
SPF_FS5_contig_3193	polycystic kidney disease protein 2	1.02888e-104	K04986
SPF_FS5_contig_3194	putative ascorbate peroxidase	4.25017e-33	K00428
SPF_FS5_contig_3196	von Willebrand factor D and EGF domain-containing protein	2.10049e-80
SPF_FS5_contig_3198	mitochondrial import inner membrane translocase subunit Tim23-like	5.25592e-59	K17794
SPF_FS5_contig_3199	mannan endo-1,4-beta-mannosidase-like	2.65947e-73
SPF_FS5_contig_3200	cathepsin L2	3.82236e-119	K01365
SPF_FS5_contig_3202	calcium and integrin-binding protein 1-like	1.70965e-70	K17259
SPF_FS5_contig_3203	pantetheinase	1.96747e-81	K08069
SPF_FS5_contig_3204	protein disulfide-isomerase	2.84496e-153	K09580
SPF_FS5_contig_3205	pancreatic triacylglycerol lipase	7.54684e-48	K14074
SPF_FS5_contig_3206	5'-nucleotidase domain-containing protein 3-like	0
SPF_FS5_contig_3207	heterogeneous nuclear ribonucleoprotein A1, A2/B1 homolog isoform X2	3.12114e-51	K12741
SPF_FS5_contig_3208	probable 60S ribosomal protein L37-A	1.0037e-42	K02922
SPF_FS5_contig_3209	ly6/neurotoxin 4	2.87544e-13
SPF_FS5_contig_3211	prominin-1-like isoform X1	6.64744e-17	K06532
[truncated: 21,687 more rows]

## Sheet: KEGG pathways
KEGG pathway identifier	Number of assigned KEGG orthologs from dataset
05200 Pathways in cancer	166
05016 Huntington disease	143
04714 Thermogenesis	128
05165 Human papillomavirus infection	122
03010 Ribosome	114
03013 RNA transport	114
04144 Endocytosis	110
04141 Protein processing in endoplasmic reticulum	106
03040 Spliceosome	101
05010 Alzheimer disease	98
05132 Salmonella infection	96
05131 Shigellosis	96
04151 PI3K-Akt signaling pathway	95
04150 mTOR signaling pathway	90
04120 Ubiquitin mediated proteolysis	89
00190 Oxidative phosphorylation	88
04010 MAPK signaling pathway	88
05012 Parkinson disease	86
04140 Autophagy - animal	85
05203 Viral carcinogenesis	84
05166 Human T-cell leukemia virus 1 infection	84
04932 Non-alcoholic fatty liver disease (NAFLD)	82
05205 Proteoglycans in cancer	80
04142 Lysosome	77
04110 Cell cycle	77
05170 Human immunodeficiency virus 1 infection	76
05169 Epstein-Barr virus infection	75
05225 Hepatocellular carcinoma	70
05206 MicroRNAs in cancer	69
04510 Focal adhesion	67
05130 Pathogenic Escherichia coli infection	67
04014 Ras signaling pathway	66
04310 Wnt signaling pathway	66
04218 Cellular senescence	66
05163 Human cytomegalovirus infection	66
04390 Hippo signaling pathway	64
00230 Purine metabolism	62
04024 cAMP signaling pathway	61
03008 Ribosome biogenesis in eukaryotes	60
04810 Regulation of actin cytoskeleton	60
04934 Cushing syndrome	60
04015 Rap1 signaling pathway	59
04723 Retrograde endocannabinoid signaling	59
04360 Axon guidance	59
05202 Transcriptional misregulation in cancer	58
05161 Hepatitis B	58
04013 MAPK signaling pathway - fly	56
04530 Tight junction	56
04550 Signaling pathways regulating pluripotency of stem cells	56
05226 Gastric cancer	56
04111 Cell cycle - yeast	55
04020 Calcium signaling pathway	54
04146 Peroxisome	54
04910 Insulin signaling pathway	54
04361 Axon regeneration	54
05224 Breast cancer	54
04114 Oocyte meiosis	53
04210 Apoptosis	53
04722 Neurotrophin signaling pathway	53
05168 Herpes simplex virus 1 infection	53
04068 FoxO signaling pathway	52
05167 Kaposi sarcoma-associated herpesvirus infection	52
03015 mRNA surveillance pathway	51
04152 AMPK signaling pathway	51
04621 NOD-like receptor signaling pathway	51
03018 RNA degradation	50
04138 Autophagy - yeast	50
04919 Thyroid hormone signaling pathway	48
04921 Oxytocin signaling pathway	47
05135 Yersinia infection	47
05152 Tuberculosis	47
00564 Glycerophospholipid metabolism	46
04371 Apelin signaling pathway	46
04022 cGMP-PKG signaling pathway	46
04145 Phagosome	46
05034 Alcoholism	46
04072 Phospholipase D signaling pathway	45
05017 Spinocerebellar ataxia	45
05160 Hepatitis C	45
04071 Sphingolipid signaling pathway	44
04113 Meiosis - yeast	44
04914 Progesterone-mediated oocyte maturation	44
05418 Fluid shear stress and atherosclerosis	44
04926 Relaxin signaling pathway	43
04728 Dopaminergic synapse	43
04212 Longevity regulating pathway - worm	43
04520 Adherens junction	42
04211 Longevity regulating pathway	42
04070 Phosphatidylinositol signaling system	41
04217 Necroptosis	41
04062 Chemokine signaling pathway	41
05164 Influenza A	41
00562 Inositol phosphate metabolism	40
04066 HIF-1 signaling pathway	40
04935 Growth hormone synthesis, secretion and action	40
05162 Measles	40
04214 Apoptosis - fly	39
04261 Adrenergic signaling in cardiomyocytes	39
04721 Synaptic vesicle cycle	39
04391 Hippo signaling pathway - fly	38
00280 Valine, leucine and isoleucine degradation	37
04350 TGF-beta signaling pathway	37
04668 TNF signaling pathway	37
04080 Neuroactive ligand-receptor interaction	37
04931 Insulin resistance	37
03050 Proteasome	36
03420 Nucleotide excision repair	36
04611 Platelet activation	36
04922 Glucagon signaling pathway	36
04928 Parathyroid hormone synthesis, secretion and action	36
04916 Melanogenesis	36
04380 Osteoclast differentiation	36
05210 Colorectal cancer	36
05220 Chronic myeloid leukemia	36
05222 Small cell lung cancer	36
00270 Cysteine and methionine metabolism	35
00510 N-Glycan biosynthesis	35
05100 Bacterial invasion of epithelial cells	35
04915 Estrogen signaling pathway	34
04972 Pancreatic secretion	34
04725 Cholinergic synapse	34
05211 Renal cell carcinoma	34
05215 Prostate cancer	34
04137 Mitophagy - animal	33
04912 GnRH signaling pathway	33
04726 Serotonergic synapse	33
05231 Choline metabolism in cancer	33
05120 Epithelial cell signaling in Helicobacter pylori infection	33
00310 Lysine degradation	32
04012 ErbB signaling pathway	32
04660 T cell receptor signaling pathway	32
04724 Glutamatergic synapse	32
05212 Pancreatic cancer	32
01522 Endocrine resistance	32
00240 Pyrimidine metabolism	31
03022 Basal transcription factors	31
03030 DNA replication	31
03460 Fanconi anemia pathway	31
04666 Fc gamma R-mediated phagocytosis	31
04925 Aldosterone synthesis and secretion	31
04260 Cardiac muscle contraction	31
04270 Vascular smooth muscle contraction	31
04213 Longevity regulating pathway - multiple species	31
05145 Toxoplasmosis	31
00010 Glycolysis / Gluconeogenesis	30
00520 Amino sugar and nucleotide sugar metabolism	30
00260 Glycine, serine and threonine metabolism	30
04620 Toll-like receptor signaling pathway	30
04933 AGE-RAGE signaling pathway in diabetic complications	30
00330 Arginine and proline metabolism	29
00513 Various types of N-glycan biosynthesis	29
00970 Aminoacyl-tRNA biosynthesis	29
04540 Gap junction	29
04625 C-type lectin receptor signaling pathway	29
04974 Protein digestion and absorption	29
05214 Glioma	29
05217 Basal cell carcinoma	29
05110 Vibrio cholerae infection	29
05142 Chagas disease (American trypanosomiasis)	29
01524 Platinum drug resistance	29
00561 Glycerolipid metabolism	28
03440 Homologous recombination	28
04064 NF-kappa B signaling pathway	28
04115 p53 signaling pathway	28
04713 Circadian entrainment	28
05235 PD-L1 expression and PD-1 checkpoint pathway in cancer	28
01521 EGFR tyrosine kinase inhibitor resistance	28
04657 IL-17 signaling pathway	27
04670 Leukocyte transendothelial migration	27
05213 Endometrial cancer	27
00380 Tryptophan metabolism	26
04340 Hedgehog signaling pathway	26
04911 Insulin secretion	26
03320 PPAR signaling pathway	26
05230 Central carbon metabolism in cancer	26
05223 Non-small cell lung cancer	26
05031 Amphetamine addiction	26
05032 Morphine addiction	26
00480 Glutathione metabolism	25
03410 Base excision repair	25
04918 Thyroid hormone synthesis	25
00020 Citrate cycle (TCA cycle)	24
00630 Glyoxylate and dicarboxylate metabolism	24
00600 Sphingolipid metabolism	24
04917 Prolactin signaling pathway	24
04727 GABAergic synapse	24
04750 Inflammatory mediator regulation of TRP channels	24
05146 Amoebiasis	24
00620 Pyruvate metabolism	23
00071 Fatty acid degradation	23
00250 Alanine, aspartate and glutamate metabolism	23
00983 Drug metabolism - other enzymes	23
03020 RNA polymerase	23
04330 Notch signaling pathway	23
04624 Toll and Imd signaling pathway	23
04662 B cell receptor signaling pathway	23
00640 Propanoate metabolism	22
00563 Glycosylphosphatidylinositol (GPI)-anchor biosynthesis	22
04630 Jak-STAT signaling pathway	22
04512 ECM-receptor interaction	22
04136 Autophagy - other	22
04623 Cytosolic DNA-sensing pathway	22
04659 Th17 cell differentiation	22
04920 Adipocytokine signaling pathway	22
04970 Salivary secretion	22
04720 Long-term potentiation	22
05218 Melanoma	22
05030 Cocaine addiction	22
05414 Dilated cardiomyopathy (DCM)	22
04622 RIG-I-like receptor signaling pathway	21
04650 Natural killer cell mediated cytotoxicity	21
04664 Fc epsilon RI signaling pathway	21
04976 Bile secretion	21
05014 Amyotrophic lateral sclerosis (ALS)	21
05410 Hypertrophic cardiomyopathy (HCM)	21
00760 Nicotinate and nicotinamide metabolism	20
04962 Vasopressin-regulated water reabsorption	20
04961 Endocrine and other factor-regulated calcium reabsorption	20
05221 Acute myeloid leukemia	20
00030 Pentose phosphate pathway	19
00860 Porphyrin and chlorophyll metabolism	19
00900 Terpenoid backbone biosynthesis	19
03060 Protein export	19
04130 SNARE interactions in vesicular transport	19
04923 Regulation of lipolysis in adipocytes	19
04924 Renin secretion	19
04927 Cortisol synthesis and secretion	19
05323 Rheumatoid arthritis	19
05134 Legionellosis	19
00051 Fructose and mannose metabolism	18
00410 beta-Alanine metabolism	18
00790 Folate biosynthesis	18
04011 MAPK signaling pathway - yeast	18
04215 Apoptosis - multiple species	18
04978 Mineral absorption	18
04730 Long-term depression	18
00052 Galactose metabolism	17
00500 Starch and sucrose metabolism	17
00350 Tyrosine metabolism	17
02010 ABC transporters	17
04341 Hedgehog signaling pathway - fly	17
04370 VEGF signaling pathway	17
04139 Mitophagy - yeast	17
04929 GnRH secretion	17
04971 Gastric acid secretion	17
05216 Thyroid cancer	17
05412 Arrhythmogenic right ventricular cardiomyopathy (ARVC)	17
05140 Leishmaniasis	17
03430 Mismatch repair	16
04060 Cytokine-cytokine receptor interaction	16
04216 Ferroptosis	16
04658 Th1 and Th2 cell differentiation	16
04979 Cholesterol metabolism	16
01523 Antifolate resistance	16
00710 Carbon fixation in photosynthetic organisms	15
00565 Ether lipid metabolism	15
04320 Dorso-ventral axis formation	15
04930 Type II diabetes mellitus	15
05133 Pertussis	15
00040 Pentose and glucuronate interconversions	14
00100 Steroid biosynthesis	14
00514 Other types of O-glycan biosynthesis	14
00670 One carbon pool by folate	14
00830 Retinol metabolism	14
04392 Hippo signaling pathway - multiple species	14
04612 Antigen processing and presentation	14
04740 Olfactory transduction	14
00650 Butanoate metabolism	13
00680 Methane metabolism	13
00062 Fatty acid elongation	13
00590 Arachidonic acid metabolism	13
01040 Biosynthesis of unsaturated fatty acids	13
00340 Histidine metabolism	13
00515 Mannose type O-glycan biosynthesis	13
04514 Cell adhesion molecules (CAMs)	13
04913 Ovarian steroidogenesis	13
04973 Carbohydrate digestion and absorption	13
05219 Bladder cancer	13
00220 Arginine biosynthesis	12
04975 Fat digestion and absorption	12
04745 Phototransduction - fly	12
04710 Circadian rhythm	12
05020 Prion diseases	12
05416 Viral myocarditis	12
00720 Carbon fixation pathways in prokaryotes	11
00450 Selenocompound metabolism	11
00532 Glycosaminoglycan biosynthesis - chondroitin sulfate / dermatan sulfate	11
00511 Other glycan degradation	11
00770 Pantothenate and CoA biosynthesis	11
00130 Ubiquinone and other terpenoid-quinone biosynthesis	11
04960 Aldosterone-regulated sodium reabsorption	11
04966 Collecting duct acid secretion	11
05204 Chemical carcinogenesis	11
05322 Systemic lupus erythematosus	11
00920 Sulfur metabolism	10
00534 Glycosaminoglycan biosynthesis - heparan sulfate / heparin	10
00531 Glycosaminoglycan degradation	10
00980 Metabolism of xenobiotics by cytochrome P450	10
03450 Non-homologous end-joining	10
02020 Two-component system	10
00360 Phenylalanine metabolism	9
04950 Maturity onset diabetes of the young	9
00053 Ascorbate and aldarate metabolism	8
00061 Fatty acid biosynthesis	8
00140 Steroid hormone biosynthesis	8
00982 Drug metabolism - cytochrome P450	8
04614 Renin-angiotensin system	8
04977 Vitamin digestion and absorption	8
04964 Proximal tubule bicarbonate reclamation	8
04742 Taste transduction	8
04626 Plant-pathogen interaction	8
00120 Primary bile acid biosynthesis	7
00730 Thiamine metabolism	7
00950 Isoquinoline alkaloid biosynthesis	7
04711 Circadian rhythm - fly	7
00440 Phosphonate and phosphinate metabolism	6
00521 Streptomycin biosynthesis	6
04122 Sulfur relay system	6
05033 Nicotine addiction	6
04940 Type I diabetes mellitus	6
05144 Malaria	6
05143 African trypanosomiasis	6
00910 Nitrogen metabolism	5
00072 Synthesis and degradation of ketone bodies	5
00430 Taurine and hypotaurine metabolism	5
00601 Glycosphingolipid biosynthesis - lacto and neolacto series	5
00603 Glycosphingolipid biosynthesis - globo and isoglobo series	5
00740 Riboflavin metabolism	5
00750 Vitamin B6 metabolism	5
00930 Caprolactam degradation	5
04016 MAPK signaling pathway - plant	5
04610 Complement and coagulation cascades	5
05321 Inflammatory bowel disease (IBD)	5
05340 Primary immunodeficiency	5
00592 alpha-Linolenic acid metabolism	4
00400 Phenylalanine, tyrosine and tryptophan biosynthesis	4
00460 Cyanoamino acid metabolism	4
00512 Mucin type O-glycan biosynthesis	4
00533 Glycosaminoglycan biosynthesis - keratan sulfate	4
00940 Phenylpropanoid biosynthesis	4
02024 Quorum sensing	4
04744 Phototransduction	4
00591 Linoleic acid metabolism	3
00290 Valine, leucine and isoleucine biosynthesis	3
00604 Glycosphingolipid biosynthesis - ganglio series	3
00785 Lipoic acid metabolism	3
00981 Insect hormone biosynthesis	3
00281 Geraniol degradation	3
00960 Tropane, piperidine and pyridine alkaloid biosynthesis	3
00627 Aminobenzoate degradation	3
00625 Chloroalkane and chloroalkene degradation	3
00643 Styrene degradation	3
04112 Cell cycle - Caulobacter	3
04712 Circadian rhythm - plant	3
00471 D-Glutamine and D-glutamate metabolism	2
00780 Biotin metabolism	2
00909 Sesquiterpenoid and triterpenoid biosynthesis	2
00232 Caffeine metabolism	2
00965 Betalain biosynthesis	2
00362 Benzoate degradation	2
00626 Naphthalene degradation	2
04061 Viral protein interaction with cytokine and cytokine receptor	2
04640 Hematopoietic cell lineage	2
00073 Cutin, suberine and wax biosynthesis	1
00300 Lysine biosynthesis	1
00908 Zeatin biosynthesis	1
00903 Limonene and pinene degradation	1
01051 Biosynthesis of ansamycins	1
00523 Polyketide sugar unit biosynthesis	1
01055 Biosynthesis of vancomycin group antibiotics	1
00944 Flavone and flavonol biosynthesis	1
00901 Indole alkaloid biosynthesis	1
00966 Glucosinolate biosynthesis	1
00261 Monobactam biosynthesis	1
00524 Neomycin, kanamycin and gentamicin biosynthesis	1
00525 Acarbose and validamycin biosynthesis	1
00401 Novobiocin biosynthesis	1
00333 Prodigiosin biosynthesis	1
00998 Biosynthesis of various secondary metabolites - part 2	1
00364 Fluorobenzoate degradation	1
00361 Chlorocyclohexane and chlorobenzene degradation	1
00623 Toluene degradation	1
03070 Bacterial secretion system	1
02025 Biofilm formation - Pseudomonas aeruginosa	1
02026 Biofilm formation - Escherichia coli	1
04672 Intestinal immune network for IgA production	1
05320 Autoimmune thyroid disease	1
05150 Staphylococcus aureus infection	1
