# Supplementary material for: First transcriptome analysis of bryozoan Fredericella sultana, the primary host of myxozoan parasite Tetracapsuloides bryosalmonae
Source: PeerJ. 2020 Apr 28;8:e9027. doi: 10.7717/peerj.9027 (PMC7194087; doi:10.7717/peerj.9027)
Supplement: Table S2 — Number of replicate reads mapped back to F. sultana contigs. Total read number and TPM expression values mapping to each contig for the three replicate zooid samples. [file peerj-08-9027-s004.xlsx]

## Sheet: Supplementary Table 2
F. sultana contig ID	Length (nt)	Zooid_1		Zooid_2		Zooid_3
		TPM	Total gene reads	TPM	Total gene reads	TPM	Total gene reads
SPF_FS5_contig_1	1927	192.638	5735	114.849	3069	111.294	2801
SPF_FS5_contig_2	407	23.2192	146	11.1624	63	12.2281	65
SPF_FS5_contig_4	1179	182.489	3324	219.702	3592	213.66	3290
SPF_FS5_contig_5	642	318.093	3155	149.954	1335	197.261	1654
SPF_FS5_contig_6	2677	19.1982	794	15.3546	570	20.0212	700
SPF_FS5_contig_7	546	1680.55	14176	1768.21	13388	1777.73	12677
SPF_FS5_contig_8	3629	1332.97	74734	1560.03	78507	1560.54	73964
SPF_FS5_contig_9	457	9109.02	64313	5670.55	35936	7754.7	46285
SPF_FS5_contig_10	932	6706.11	96560	4572.66	59098	4732.28	57603
SPF_FS5_contig_11	3106	8.56504	411	9.26367	399	8.57865	348
SPF_FS5_contig_12	7639	17.9041	2113	18.2099	1929	17.6408	1760
SPF_FS5_contig_13	2894	15849.8	708650	14286.6	573346	16090.6	608178
SPF_FS5_contig_14	3054	186.553	8802	242.241	10259	223.909	8931
SPF_FS5_contig_15	13366	14.0681	2905	14.2326	2638	15.5643	2717
SPF_FS5_contig_16	382	7633.95	45053	6759.15	35805	6992.04	34884
SPF_FS5_contig_17	5187	5.54059	444	5.9086	425	6.45069	437
SPF_FS5_contig_18	3655	7864.58	444093	6873.61	348386	7834.27	373977
SPF_FS5_contig_19	2140	9.86037	326	7.81782	232	9.26674	259
SPF_FS5_contig_20	1548	72.8812	1743	53.4789	1148	62.223	1258
SPF_FS5_contig_21	4519	18.8926	1319	25.7078	1611	27.6346	1631
SPF_FS5_contig_22	1574	2184.62	53124	1472.12	32132	1568.31	32240
SPF_FS5_contig_23	1900	309.772	9093	360.677	9503	334.879	8310
SPF_FS5_contig_24	1489	28.8644	664	29.2035	603	26.6879	519
SPF_FS5_contig_25	836	2.55504	33	2.50152	29	2.93079	32
SPF_FS5_contig_26	4331	6.71038	449	6.9099	415	5.69258	322
SPF_FS5_contig_27	1109	4.55252	78	4.87687	75	6.28277	91
SPF_FS5_contig_28	1708	55.4429	1463	67.8906	1608	69.484	1550
SPF_FS5_contig_29	837	1937.65	25056	2075.76	24093	2051.48	22426
SPF_FS5_contig_30	969	1827.67	27361	1756.08	23597	1809.55	22901
SPF_FS5_contig_31	1784	75.068	2069	91.2727	2258	80.5154	1876
SPF_FS5_contig_32	2591	6.91993	277	6.15087	221	7.18092	243
SPF_FS5_contig_33	3678	19.0241	1081	20.7437	1058	23.8569	1146
SPF_FS5_contig_34	1028	7.05203	112	10.7327	153	8.63985	116
SPF_FS5_contig_35	3644	24.033	1353	32.0985	1622	31.8328	1515
SPF_FS5_contig_36	928	6966.37	99877	11450.8	147358	11013.1	133480
SPF_FS5_contig_37	698	1079.78	11644	93.7052	907	207.323	1890
SPF_FS5_contig_38	308	4342.84	20665	4268.7	18232	4172.9	16786
SPF_FS5_contig_40	2035	1712.88	53852	2951.41	83288	3226.46	85753
SPF_FS5_contig_41	2125	252.087	8276	220.614	6501	240.33	6670
SPF_FS5_contig_42	967	1569.06	23441	1174.09	15744	1118.42	14125
SPF_FS5_contig_44	762	1303.05	15340	1353.2	14299	1299.23	12930
SPF_FS5_contig_45	1146	3.16295	56	2.7058	43	2.20481	33
SPF_FS5_contig_46	1758	879.308	23882	1317.23	32112	271.773	6240
SPF_FS5_contig_47	2806	2101.29	91093	2058.68	80106	2711.22	99360
SPF_FS5_contig_48	700	270.561	2926	220.15	2137	250.374	2289
SPF_FS5_contig_49	2372	616.467	22591	702.339	23102	671.445	20801
SPF_FS5_contig_50	2222	118.182	4057	146.4	4511	129.116	3747
SPF_FS5_contig_51	4064	714.169	44840	601.814	33916	1148.5	60960
SPF_FS5_contig_52	2976	850.463	39102	1313.15	54192	337.476	13117
SPF_FS5_contig_53	1623	7.57747	190	8.2643	186	6.60466	140
SPF_FS5_contig_54	642	40.5303	402	46.6149	415	42.4577	356
SPF_FS5_contig_55	14649	20.4403	4626	19.1099	3882	21.2834	4072
SPF_FS5_contig_56	1976	47.5302	1451	71.8207	1968	61.7263	1593
SPF_FS5_contig_57	4075	103.183	6496	121.662	6875	115.386	6141
SPF_FS5_contig_58	4032	19.6494	1224	23.6799	1324	21.7243	1144
SPF_FS5_contig_59	5655	30.0002	2621	29.9928	2352	31.1277	2299
SPF_FS5_contig_60	619	1687.41	16137	1865.26	16011	1787.76	14453
SPF_FS5_contig_61	5388	11.3526	945	9.02078	674	10.0043	704
SPF_FS5_contig_62	1300	466.536	9370	494.748	8919	515.531	8753
SPF_FS5_contig_63	1471	809.997	18408	981.782	20027	1031.6	19819
SPF_FS5_contig_64	400	1.78001	11	0.180282	1	0.382835	2
SPF_FS5_contig_65	650	20.1153	202	23.5198	212	20.143	171
SPF_FS5_contig_66	1222	47.0361	888	51.3995	871	54.3237	867
SPF_FS5_contig_68	1368	1736.15	36693	1713.57	32507	1580.14	28232
SPF_FS5_contig_69	2235	103.419	3571	142.322	4411	130.386	3806
SPF_FS5_contig_71	433	26.3096	176	26.6467	160	35.7194	202
SPF_FS5_contig_72	876	96.5002	1306	144.308	1753	127.262	1456
SPF_FS5_contig_73	2400	100.948	3743	68.1765	2269	68.5593	2149
SPF_FS5_contig_74	1275	242.817	4783	189.473	3350	177.035	2948
SPF_FS5_contig_75	735	314.127	3567	204.466	2084	250.119	2401
SPF_FS5_contig_76	1056	774.463	12635	767.29	11236	791.916	10922
SPF_FS5_contig_77	1422	126.633	2782	149.753	2953	144.411	2682
SPF_FS5_contig_78	2393	666.156	24628	674.599	22386	736.137	23007
SPF_FS5_contig_79	1885	157.269	4580	238.488	6234	202.77	4992
SPF_FS5_contig_80	858	2104.25	27893	1576.65	18759	1556.24	17439
SPF_FS5_contig_81	715	820.727	9066	882.599	8751	845.449	7895
SPF_FS5_contig_82	834	37.2533	480	43.7518	506	37.7326	411
SPF_FS5_contig_83	554	176.657	1512	121.576	934	110.151	797
SPF_FS5_contig_84	3495	24.5946	1328	23.5217	1140	22.9591	1048
SPF_FS5_contig_85	1862	498.006	14326	506.415	13076	463.349	11268
SPF_FS5_contig_86	2387	824.158	30393	923.236	30560	940.358	29316
SPF_FS5_contig_87	3468	43.0957	2309	28.0092	1347	29.9158	1355
SPF_FS5_contig_88	598	1027.96	9497	1031.89	8557	1006	7857
SPF_FS5_contig_89	2847	27.919	1228	29.3061	1157	28.5075	1060
SPF_FS5_contig_90	1431	22.0282	487	23.0801	458	22.6865	424
SPF_FS5_contig_91	1192	213.025	3923	615.499	10174	466.981	7270
SPF_FS5_contig_93	378	1.02742	6	0	0	0	0
SPF_FS5_contig_94	1193	22.8418	421	21.7003	359	23.7467	370
SPF_FS5_contig_95	1881	190.604	5539	206.6	5389	215.983	5306
SPF_FS5_contig_96	1156	215.684	3852	247.279	3964	237.45	3585
SPF_FS5_contig_97	669	132.164	1366	181.629	1685	170.187	1487
SPF_FS5_contig_98	795	46.4899	571	28.8451	318	28.5079	296
SPF_FS5_contig_99	2804	168.49	7299	270.86	10532	249.607	9141
SPF_FS5_contig_100	1499	144.18	3339	143.937	2992	145.727	2853
SPF_FS5_contig_101	762	639.546	7529	682.137	7208	679.054	6758
SPF_FS5_contig_102	654	208.831	2110	220.859	2003	219.164	1872
SPF_FS5_contig_103	1590	191.537	4705	188.99	4167	180.053	3739
SPF_FS5_contig_104	861	1634.28	21739	1697.29	20265	1680.38	18896
SPF_FS5_contig_105	654	3.76093	38	2.20528	20	3.27809	28
SPF_FS5_contig_106	677	9.36972	98	14.0604	132	14.1372	125
SPF_FS5_contig_107	963	163.264	2429	189.23	2527	194.001	2440
SPF_FS5_contig_108	1000	979.328	15130	1096.18	15201	1016.35	13274
SPF_FS5_contig_109	2417	54.8457	2048	104.604	3506	96.6194	3050
SPF_FS5_contig_110	16607	9.74012	2499	21.768	5013	22.0337	4779
SPF_FS5_contig_111	347	1103.35	5915	498.554	2399	222.198	1007
SPF_FS5_contig_112	7029	22.9848	2496	37.9081	3695	38.5394	3538
SPF_FS5_contig_113	1245	128.519	2472	147.932	2554	149.936	2438
SPF_FS5_contig_114	5594	42.9859	3715	66.7629	5179	67.6154	4940
SPF_FS5_contig_115	743	2078.25	23856	1048.79	10806	1143.45	11096
SPF_FS5_contig_116	2544	39.0808	1536	67.1804	2370	63.2038	2100
SPF_FS5_contig_117	1459	2938.87	66244	2849.71	57656	3020.96	57565
SPF_FS5_contig_118	1698	23.7868	624	27.8173	655	29.265	649
SPF_FS5_contig_119	1356	524.312	10984	569.935	10717	575.889	10199
SPF_FS5_contig_120	1408	63.7162	1386	29.9104	584	50.6277	931
SPF_FS5_contig_121	1296	1025	20523	967.456	17387	1027.86	17398
SPF_FS5_contig_122	478	652.421	4818	575.996	3818	587.547	3668
SPF_FS5_contig_123	2323	88.6904	3183	73.1371	2356	81.3791	2469
SPF_FS5_contig_124	979	249.059	3767	177.74	2413	215.936	2761
SPF_FS5_contig_125	481	651.582	4842	574.353	3831	694.674	4364
SPF_FS5_contig_126	494	3953.36	30172	3722.56	25501	3265.41	21068
SPF_FS5_contig_127	828	1290.56	16509	1390.26	15963	1355.27	14656
SPF_FS5_contig_130	392	32.1987	195	33.6648	183	36.7209	188
SPF_FS5_contig_131	1359	95.4958	2005	124.804	2352	120.4	2137
SPF_FS5_contig_132	3336	24.4669	1261	23.7565	1099	25.66	1118
SPF_FS5_contig_133	2427	346.12	12978	388.731	13083	358.953	11378
SPF_FS5_contig_134	1665	359.947	9259	388.369	8967	382.099	8309
SPF_FS5_contig_135	1150	85.4404	1518	113.186	1805	99.2041	1490
SPF_FS5_contig_136	808	607.942	7589	579.668	6495	574.915	6067
SPF_FS5_contig_137	462	2319.4	16555	1555.57	9966	1557.85	9400
SPF_FS5_contig_138	2205	36.811	1254	44.4123	1358	45.2457	1303
SPF_FS5_contig_139	844	8.35937	109	31.0153	363	56.9716	628
SPF_FS5_contig_140	3042	102.283	4807	108.667	4584	113.567	4512
SPF_FS5_contig_141	7044	17.5327	1908	21.5806	2108	21.707	1997
SPF_FS5_contig_142	1027	11091.5	175984	8519.69	121334	9302.62	124777
SPF_FS5_contig_143	697	347.504	3742	232.375	2246	316.374	2880
SPF_FS5_contig_144	787	846.558	10293	817.43	8921	835.62	8589
SPF_FS5_contig_145	1122	1711.01	29659	930.395	14476	1000.76	14665
SPF_FS5_contig_146	505	921.567	7190	80.8233	566	146.766	968
SPF_FS5_contig_147	941	40.6525	591	37.2442	486	34.8253	428
SPF_FS5_contig_148	395	10.9791	67	10.5887	58	1.74456	9
SPF_FS5_contig_149	1866	12.7998	369	15.6128	404	15.0179	366
SPF_FS5_contig_150	1809	12.0224	336	13.7927	346	16.1684	382
SPF_FS5_contig_151	2945	7.80247	355	13.3696	546	11.3875	438
SPF_FS5_contig_152	1194	228.715	4219	212.895	3525	224.378	3499
SPF_FS5_contig_153	1311	84.8716	1719	92.5199	1682	90.7005	1553
SPF_FS5_contig_154	2141	365.359	12085	398.051	11818	431.578	12068
SPF_FS5_contig_155	1766	69.0892	1885	94.2855	2309	92.652	2137
SPF_FS5_contig_156	4124	7.26694	463	8.27093	473	7.4079	399
SPF_FS5_contig_157	1698	68.3871	1794	59.7966	1408	56.4106	1251
SPF_FS5_contig_158	1240	168.448	3227	137.247	2360	129.979	2105
SPF_FS5_contig_159	2200	247.789	8422	164.974	5033	127.797	3672
SPF_FS5_contig_160	3371	106.836	5564	109.1	5100	108.888	4794
SPF_FS5_contig_161	1107	17.4244	298	16.7416	257	17.0149	246
SPF_FS5_contig_162	810	1433.52	17939	1035.04	11626	1227.62	12987
SPF_FS5_contig_163	638	1635.33	16119	1664.58	14727	1719.52	14328
SPF_FS5_contig_164	353	278.897	1521	169.761	831	205.841	949
SPF_FS5_contig_165	791	24.3854	298	39.0193	428	40.655	420
SPF_FS5_contig_166	5123	3.99256	316	4.2088	299	4.81252	322
SPF_FS5_contig_167	1028	3.08526	49	3.22683	46	1.86204	25
SPF_FS5_contig_168	1408	755.124	16426	496.44	9693	546.355	10047
SPF_FS5_contig_169	1392	358.094	7701	320.052	6178	370.953	6744
SPF_FS5_contig_170	1916	74.761	2213	97.5554	2592	89.9142	2250
SPF_FS5_contig_171	8083	5.71761	714	4.32694	485	4.70787	497
SPF_FS5_contig_172	3690	16.6818	951	15.1847	777	18.0316	869
SPF_FS5_contig_173	3172	17.0798	837	19.8469	873	20.0348	830
SPF_FS5_contig_174	1641	33.3696	846	32.2991	735	34.2941	735
SPF_FS5_contig_175	2439	13.8797	523	13.4528	455	14.0953	449
SPF_FS5_contig_176	1821	244.621	6882	524.47	13244	492.829	11721
SPF_FS5_contig_177	2308	1100.82	39252	802.707	25691	888.581	26785
SPF_FS5_contig_178	1268	271.008	5309	294.707	5182	458.979	7601
SPF_FS5_contig_179	701	119.945	1299	63.6772	619	113.485	1039
SPF_FS5_contig_180	1862	3.85862	111	5.42201	140	5.30458	129
SPF_FS5_contig_181	3073	5.8556	278	3.84851	164	2.96501	119
SPF_FS5_contig_182	3792	6.26451	367	8.48161	446	7.71323	382
SPF_FS5_contig_183	640	766.617	7580	794.93	7055	800.842	6694
SPF_FS5_contig_184	3753	169.589	9833	147.991	7702	167.272	8199
SPF_FS5_contig_185	2399	27.3048	1012	30.9011	1028	27.5437	863
SPF_FS5_contig_186	2758	14.3865	613	14.799	566	14.6582	528
SPF_FS5_contig_187	2363	416.661	15211	427.091	13995	439.83	13574
SPF_FS5_contig_188	459	2633.24	18673	2045.24	13018	435.881	2613
SPF_FS5_contig_189	2111	110.015	3588	176.302	5161	142.216	3921
SPF_FS5_contig_190	1308	168.945	3414	249.417	4524	222.325	3798
SPF_FS5_contig_191	2870	48.7374	2161	63.821	2540	59.4928	2230
SPF_FS5_contig_192	1442	465.257	10365	447.029	8939	470.127	8854
SPF_FS5_contig_193	1387	107.428	2302	104.192	2004	113.111	2049
SPF_FS5_contig_194	1656	26.579	680	32.921	756	26.2158	567
SPF_FS5_contig_195	824	1504.29	19150	1467.81	16772	1497.14	16112
SPF_FS5_contig_196	866	1655.19	22145	1861.69	22357	1789.42	20239
SPF_FS5_contig_197	2279	36.5814	1288	40.8501	1291	41.0216	1221
SPF_FS5_contig_198	867	615.397	8243	517.847	6226	481.215	5449
SPF_FS5_contig_199	788	41.8922	510	41.9132	458	47.0284	484
SPF_FS5_contig_200	1660	117.445	3012	120.941	2784	122.461	2655
SPF_FS5_contig_202	575	4701.13	41762	2450.08	19536	2560.53	19229
SPF_FS5_contig_203	767	5.90734	70	5.54713	59	5.09115	51
SPF_FS5_contig_204	1382	0.889887	19	3.28734	63	3.10257	56
SPF_FS5_contig_205	726	10392.7	116567	9036.63	90977	9415.51	89277
SPF_FS5_contig_206	564	1406.79	12258	251.116	1964	425.869	3137
SPF_FS5_contig_207	916	759.065	10742	732.07	9299	741.679	8873
SPF_FS5_contig_208	396	1499.36	9173	229.085	1258	411.064	2126
SPF_FS5_contig_209	823	3187.3	40526	620.975	7087	633.561	6810
SPF_FS5_contig_210	1928	222.618	6631	280.222	7492	259.049	6523
SPF_FS5_contig_211	1794	57.5837	1596	57.2801	1425	60.9036	1427
SPF_FS5_contig_212	2440	6.04831	228	5.17202	175	1.85141	59
SPF_FS5_contig_213	302	12.6455	59	8.835	37	8.11305	32
SPF_FS5_contig_214	506	443.883	3470	519.753	3647	586.206	3874
SPF_FS5_contig_215	538	80.729	671	13.6719	102	18.2167	128
SPF_FS5_contig_216	505	1568.59	12238	984.874	6897	1142.29	7534
SPF_FS5_contig_217	660	0.49036	5	0.437047	4	0.348031	3
SPF_FS5_contig_218	612	418.402	3956	372.464	3161	386.338	3088
SPF_FS5_contig_219	816	254.944	3214	335.289	3794	299.699	3194
SPF_FS5_contig_220	3452	83.122	4433	78.4633	3756	69.4913	3133
SPF_FS5_contig_221	2920	19.5734	883	19.1148	774	18.696	713
SPF_FS5_contig_222	925	27.7104	396	19.412	249	16.1411	195
SPF_FS5_contig_224	566	38.0818	333	23.8252	187	20.2916	150
SPF_FS5_contig_225	3702	14.5121	830	18.8366	967	16.9804	821
SPF_FS5_contig_226	2112	12.8107	418	22.9791	673	25.9211	715
SPF_FS5_contig_227	515	113.87	906	93.5364	668	102.436	689
SPF_FS5_contig_228	498	15.597	120	17.0869	118	10.1474	66
SPF_FS5_contig_229	2950	45.1338	2057	45.981	1881	43.6561	1682
SPF_FS5_contig_230	1045	674.467	10889	767.017	11115	784.866	10712
SPF_FS5_contig_231	897	496.822	6885	522.154	6495	497.301	5826
SPF_FS5_contig_232	6252	12.1752	1176	12.2725	1064	11.2425	918
SPF_FS5_contig_233	2034	89.8676	2824	23.8603	673	23.0002	611
SPF_FS5_contig_234	1476	77.6643	1771	80.7603	1653	74.0251	1427
SPF_FS5_contig_235	2571	47.2302	1876	51.6653	1842	45.8925	1541
SPF_FS5_contig_236	2522	61.7247	2405	13.782	482	24.6824	813
SPF_FS5_contig_237	1526	133.57	3149	180.045	3810	167.986	3348
SPF_FS5_contig_238	656	1374.97	13935	1425.65	12969	1403.88	12028
SPF_FS5_contig_239	2256	60.1656	2097	36.2481	1134	27.1514	800
SPF_FS5_contig_240	5648	12.1364	1059	9.5631	749	10.0725	743
SPF_FS5_contig_241	5280	16.3535	1334	18.5062	1355	19.9973	1379
SPF_FS5_contig_242	1579	4.14027	101	3.28823	72	2.71548	56
SPF_FS5_contig_243	2029	519.607	16288	524.052	14745	523.93	13884
SPF_FS5_contig_244	2988	17.3517	801	21.0932	874	21.7555	849
SPF_FS5_contig_245	3161	88.8699	4340	115.732	5073	99.2875	4099
SPF_FS5_contig_246	744	348.346	4004	299.597	3091	301.945	2934
SPF_FS5_contig_247	1078	28.641	477	21.0719	315	26.493	373
SPF_FS5_contig_248	1051	42.618	692	56.5374	824	60.0296	824
SPF_FS5_contig_249	2143	312.07	10332	323.481	9613	312.52	8747
SPF_FS5_contig_250	368	0.70356	4	0.195958	1	0.208062	1
SPF_FS5_contig_251	705	62.7077	683	114.051	1115	78.3046	721
SPF_FS5_contig_253	1259	45.3453	882	77.325	1350	67.8703	1116
SPF_FS5_contig_254	3454	31.2019	1665	63.5318	3043	68.9856	3112
SPF_FS5_contig_256	1517	43.5642	1021	55.7126	1172	48.9079	969
SPF_FS5_contig_257	1594	1860.82	45825	1502.65	33215	1576.78	32826
SPF_FS5_contig_258	989	2388.77	36499	2465.17	33809	2461.13	31790
SPF_FS5_contig_259	562	7410.38	64341	984.171	7670	1683.25	12355
SPF_FS5_contig_260	1261	600.976	11708	686.757	12009	729.055	12007
SPF_FS5_contig_261	1009	221.382	3451	270.369	3783	253.68	3343
SPF_FS5_contig_262	5760	54.4228	4843	63.9499	5108	60.5224	4553
SPF_FS5_contig_263	2316	21.2405	760	26.7776	860	25.886	783
SPF_FS5_contig_264	842	1191.92	15505	913.998	10672	1040.93	11447
SPF_FS5_contig_265	1649	34.8563	888	43.5125	995	42.1141	907
SPF_FS5_contig_266	2125	89.2479	2930	63.8664	1882	69.7209	1935
SPF_FS5_contig_267	340	272.808	1433	312.842	1475	333.967	1483
SPF_FS5_contig_268	313	2.27477	11	4.14706	18	8.07255	33
SPF_FS5_contig_269	394	46.6564	284	70.4654	385	85.1175	438
SPF_FS5_contig_270	682	38.4379	405	55.512	525	66.9118	596
SPF_FS5_contig_271	558	2470.55	21298	3063.63	23706	3156.67	23005
SPF_FS5_contig_272	5715	9.3099	822	5.76649	457	5.61357	419
SPF_FS5_contig_273	2930	41.4875	1878	44.892	1824	42.3339	1620
SPF_FS5_contig_275	723	658.108	7351	492.72	4940	833.34	7869
SPF_FS5_contig_276	1948	518.95	15618	460.144	12430	528.775	13453
SPF_FS5_contig_277	342	173.175	915	216.76	1028	224.328	1002
SPF_FS5_contig_278	1952	3059.37	92262	3204.1	86731	3169.45	80802
SPF_FS5_contig_279	1075	7.88773	131	8.92185	133	14.3875	202
SPF_FS5_contig_280	903	9.46184	132	15.0135	188	17.8063	210
SPF_FS5_contig_281	2478	38.5806	1477	41.0035	1409	38.4379	1244
SPF_FS5_contig_282	637	18822.8	185240	14930.6	131888	16139.8	134275
SPF_FS5_contig_283	783	43.7304	529	31.2212	339	31.6829	324
SPF_FS5_contig_284	1264	1448.28	28282	1556.41	27281	1544.06	25490
SPF_FS5_contig_285	2225	39.8838	1371	63.1026	1947	69.4436	2018
SPF_FS5_contig_286	968	179.739	2688	153.761	2064	177.101	2239
SPF_FS5_contig_287	2233	23.7982	821	26.3197	815	25.3737	740
SPF_FS5_contig_288	3052	1.71787	81	2.12652	90	2.43348	97
SPF_FS5_contig_289	1255	123.885	2402	121.184	2109	126.29	2070
SPF_FS5_contig_290	3365	484.524	25189	455.906	21274	498.015	21887
SPF_FS5_contig_291	1351	1986.38	41460	1598.81	29953	1368.29	24143
SPF_FS5_contig_292	727	277.251	3114	240.243	2422	247.816	2353
SPF_FS5_contig_293	5603	18.2295	1578	19.2669	1497	18.0929	1324
SPF_FS5_contig_294	1825	205.107	5783	238.94	6047	269.012	6412
SPF_FS5_contig_295	1545	54.1701	1293	54.9363	1177	51.0942	1031
SPF_FS5_contig_296	1436	152.804	3390	612.054	12188	469.745	8810
SPF_FS5_contig_297	3706	817.268	46793	888.819	45678	970.474	46973
SPF_FS5_contig_298	2007	6.48243	201	4.85063	135	4.57799	120
SPF_FS5_contig_299	2298	268.966	9549	132.991	4238	180.022	5403
SPF_FS5_contig_300	499	180.174	1389	230.789	1597	189.346	1234
SPF_FS5_contig_301	426	39.809	262	51.63	305	39.1821	218
SPF_FS5_contig_302	1818	49.4536	1389	48.3131	1218	52.645	1250
SPF_FS5_contig_303	609	6.05824	57	8.64405	73	9.05225	72
SPF_FS5_contig_304	3152	17.0033	828	29.8563	1305	27.2551	1122
SPF_FS5_contig_305	4313	7.80393	520	7.64097	457	6.79924	383
SPF_FS5_contig_306	1808	2038.42	56938	2249.05	56388	2108.6	49791
SPF_FS5_contig_307	514	1279.57	10161	1084.08	7727	1200.19	8057
SPF_FS5_contig_308	435	509.488	3424	320.114	1931	346.047	1966
SPF_FS5_contig_309	983	289.002	4389	312.439	4259	294.74	3784
SPF_FS5_contig_310	571	1495.76	13195	1644.19	13019	1636.33	12203
SPF_FS5_contig_311	1635	270.985	6845	275.748	6252	264.776	5654
SPF_FS5_contig_312	842	2285.14	29726	2408.07	28117	2411.95	26524
SPF_FS5_contig_313	584	52.5357	474	66.1856	536	52.1809	398
SPF_FS5_contig_314	518	6.74766	54	9.88417	71	9.16438	62
SPF_FS5_contig_316	1772	635.294	17392	650.072	15974	657.387	15214
SPF_FS5_contig_317	1723	13.6743	364	22.2658	532	22.9301	516
SPF_FS5_contig_318	2149	670.016	22245	746.965	22260	906.44	25441
SPF_FS5_contig_319	2214	24.7333	846	32.5061	998	30.1219	871
SPF_FS5_contig_320	733	12.0978	137	9.64126	98	7.41644	71
SPF_FS5_contig_321	936	348.602	5041	281.748	3657	280.009	3423
SPF_FS5_contig_322	498	33.4036	257	38.9524	269	35.2085	229
SPF_FS5_contig_323	2196	213.843	7255	295.412	8996	267.845	7682
SPF_FS5_contig_324	1094	431.497	7293	312.972	4748	345.251	4933
SPF_FS5_contig_325	738	13143.2	149854	12404.7	126950	13267.4	127880
SPF_FS5_contig_326	926	242.903	3475	226.15	2904	220.357	2665
SPF_FS5_contig_327	975	769.428	11590	771.051	10425	745.958	9499
SPF_FS5_contig_328	381	0.169889	1	0.567816	3	0.401926	2
SPF_FS5_contig_329	4178	25.5781	1651	31.1372	1804	29.2486	1596
SPF_FS5_contig_330	3717	13.5829	780	12.2613	632	13.9456	677
SPF_FS5_contig_331	458	568.274	4021	451.255	2866	458.9	2745
SPF_FS5_contig_332	563	1312.03	11412	1485.16	11595	1406.9	10345
SPF_FS5_contig_333	1714	5156.15	136536	5876.93	139685	5514.11	123437
SPF_FS5_contig_334	4158	90.5065	5814	115.921	6684	112.733	6122
SPF_FS5_contig_335	2883	4.60255	205	5.95311	238	4.67422	176
SPF_FS5_contig_336	2015	250.141	7787	162.262	4534	177.795	4679
SPF_FS5_contig_337	3244	11.1737	560	11.8706	534	11.9665	507
SPF_FS5_contig_338	1224	265.838	5027	232.127	3940	281.746	4504
SPF_FS5_contig_339	462	64.3073	459	66.3374	425	69.1091	417
SPF_FS5_contig_340	310	32.3638	155	31.8692	137	54.5848	221
SPF_FS5_contig_341	1308	287.365	5807	497.015	9015	468.006	7995
SPF_FS5_contig_342	866	12.7063	170	12.3241	148	9.90242	112
SPF_FS5_contig_343	727	0.71227	8	0.991921	10	1.47447	14
SPF_FS5_contig_344	2207	37.5696	1281	62.4083	1910	56.4104	1626
SPF_FS5_contig_345	897	929.061	12875	959.332	11933	967.201	11331
SPF_FS5_contig_346	748	747.569	8639	631.372	6549	703.638	6874
SPF_FS5_contig_347	1384	1937.1	41419	1592.42	30562	1680.05	30368
SPF_FS5_contig_348	3281	49.8132	2525	54.4856	2479	51.2002	2194
SPF_FS5_contig_349	2687	30.256	1256	30.4607	1135	25.9307	910
SPF_FS5_contig_350	2995	61.9612	2867	62.7465	2606	63.0942	2468
SPF_FS5_contig_352	538	1824.76	15167	1474.15	10998	2850.77	20031
SPF_FS5_contig_353	475	1985.98	14574	2164.59	14258	2228.02	13822
SPF_FS5_contig_354	1007	5.59215	87	4.3683	61	4.63811	61
SPF_FS5_contig_355	5857	15.7371	1424	18.0128	1463	18.4718	1413
SPF_FS5_contig_356	1622	59.8191	1499	50.6834	1140	52.8227	1119
SPF_FS5_contig_357	3682	37.8486	2153	41.9319	2141	46.9757	2259
SPF_FS5_contig_358	1161	1249.78	22417	1371.88	22087	1291.15	19578
SPF_FS5_contig_359	1642	6.66197	169	6.01671	137	5.36248	115
SPF_FS5_contig_360	5983	143.941	13305	176.985	14684	168.056	13132
SPF_FS5_contig_361	2599	269.296	10813	263.756	9506	252.473	8570
SPF_FS5_contig_362	792	1215.68	14875	1223.55	13438	1179.25	12198
SPF_FS5_contig_363	2705	63.4593	2652	43.4009	1628	50.3275	1778
SPF_FS5_contig_364	4942	25.671	1960	29.811	2043	29.0806	1877
SPF_FS5_contig_365	3228	8.16113	407	8.7125	390	8.32558	351
SPF_FS5_contig_366	631	1.43611	14	1.25711	11	1.82013	15
SPF_FS5_contig_368	1389	18.7332	402	37.1726	716	27.2311	494
SPF_FS5_contig_369	1369	15.3663	325	18.015	342	16.3872	293
SPF_FS5_contig_370	1950	40.2971	1214	44.9687	1216	42.8775	1092
SPF_FS5_contig_371	6125	14.6998	1391	11.4556	973	12.3132	985
SPF_FS5_contig_372	828	266.415	3408	315.711	3625	314.498	3401
SPF_FS5_contig_373	2673	87.7321	3623	83.4975	3095	73.1868	2555
SPF_FS5_contig_374	1557	17.1277	412	14.1724	306	14.3594	292
SPF_FS5_contig_375	1978	673.127	20570	716.752	19660	706.212	18244
SPF_FS5_contig_376	1398	476.891	10300	366.495	7105	404.578	7387
SPF_FS5_contig_377	2847	11.5041	506	10.4357	412	10.2466	381
SPF_FS5_contig_378	2925	11.5514	522	13.6829	555	13.1145	501
SPF_FS5_contig_379	1550	39.5882	948	47.2687	1016	41.3955	838
SPF_FS5_contig_380	716	8190.21	90598	13049.2	129564	12956.2	121157
SPF_FS5_contig_381	3782	21.051	1230	22.08	1158	22.1684	1095
SPF_FS5_contig_382	1052	286.413	4655	292.975	4274	295.641	4062
SPF_FS5_contig_383	561	0.576894	5	1.02834	8	1.36483	10
SPF_FS5_contig_384	1491	132.798	3059	156.655	3239	156.164	3041
SPF_FS5_contig_385	907	1420.94	19911	568.315	7148	534.702	6334
SPF_FS5_contig_386	2585	226.334	9039	162.191	5814	178.814	6037
SPF_FS5_contig_387	4827	10.4996	783	11.9814	802	12.4836	787
SPF_FS5_contig_388	582	19.4628	175	30.4806	246	40.2568	306
SPF_FS5_contig_389	1995	18.9154	583	14.4225	399	14.6609	382
SPF_FS5_contig_390	1314	20.3936	414	7.46372	136	6.87587	118
SPF_FS5_contig_391	3889	4.56039	274	6.21181	335	6.35925	323
SPF_FS5_contig_392	1347	2047.4	42607	1074.03	20062	1138.04	20021
SPF_FS5_contig_393	4626	496.301	35470	478.849	30718	504.554	30484
SPF_FS5_contig_394	2073	9.4609	303	9.84462	283	9.71399	263
SPF_FS5_contig_396	740	65.1649	745	47.6528	489	53.2864	515
SPF_FS5_contig_399	1626	216.714	5444	230.885	5206	244.298	5188
SPF_FS5_contig_400	1917	181.149	5365	73.8431	1963	71.6542	1794
SPF_FS5_contig_401	1524	319.221	7516	406.982	8601	386.653	7696
SPF_FS5_contig_402	433	11587.4	77515	9875.94	59300	10554.7	59689
SPF_FS5_contig_403	354	8.22808	45	6.51866	32	3.89323	18
SPF_FS5_contig_404	1292	117.632	2348	140.43	2516	137.548	2321
SPF_FS5_contig_405	4693	16.9232	1227	22.88	1489	22.2212	1362
SPF_FS5_contig_406	1462	374.862	8467	366.877	7438	258.976	4945
SPF_FS5_contig_407	2406	4.1968	156	3.44678	115	3.53239	111
SPF_FS5_contig_408	2956	31.0719	1419	40.0328	1641	38.2835	1478
SPF_FS5_contig_409	3071	34.8825	1655	50.1807	2137	48.942	1963
SPF_FS5_contig_410	1431	168.31	3721	116.811	2318	115.359	2156
SPF_FS5_contig_411	581	1513.47	13585	1530.38	12330	1491.8	11320
SPF_FS5_contig_412	2848	37.5683	1653	29.6249	1170	34.7078	1291
SPF_FS5_contig_413	939	85.0626	1234	78.7172	1025	77.8716	955
SPF_FS5_contig_414	664	35.3857	363	31.3864	289	27.9054	242
SPF_FS5_contig_415	2427	25.0963	941	27.8705	938	23.9765	760
SPF_FS5_contig_416	1235	35.4822	677	45.9536	787	47.7381	770
SPF_FS5_contig_417	2997	47.6008	2204	55.5583	2309	54.1103	2118
SPF_FS5_contig_418	553	286.651	2449	439.457	3370	574.183	4147
SPF_FS5_contig_419	502	108.954	845	122.678	854	263.408	1727
SPF_FS5_contig_420	1652	85.3761	2179	83.8987	1922	84.5851	1825
SPF_FS5_contig_421	632	142.155	1388	239.273	2097	321.775	2656
SPF_FS5_contig_422	574	1955.25	17339	1978.7	15750	1928.98	14461
SPF_FS5_contig_423	1468	0.925939	21	0.835092	17	0.417258	8
SPF_FS5_contig_424	2483	30.7084	1178	35.5191	1223	28.2154	915
SPF_FS5_contig_425	1201	221.184	4104	426.492	7103	365.303	5730
SPF_FS5_contig_426	964	215.938	3216	381.509	5100	300.39	3782
SPF_FS5_contig_428	4896	27.3003	2065	30.1795	2049	28.8377	1844
SPF_FS5_contig_429	1247	6.64405	128	4.85763	84	4.78927	78
SPF_FS5_contig_430	421	841.766	5475	755.727	4412	715.109	3932
SPF_FS5_contig_432	679	814.862	8548	343.358	3233	308.974	2740
SPF_FS5_contig_433	4521	34.991	2444	32.8582	2060	32.3983	1913
SPF_FS5_contig_434	4761	12.8068	942	13.4501	888	14.3774	894
SPF_FS5_contig_435	678	76.6611	803	60.8384	572	55.1101	488
SPF_FS5_contig_436	497	1322.94	10158	1302.96	8980	1303.79	8463
SPF_FS5_contig_437	2383	8.31164	306	8.26134	273	9.25358	288
SPF_FS5_contig_438	930	47.3277	680	41.174	531	46.6811	567
SPF_FS5_contig_439	737	891.695	10153	1420.73	14520	344.915	3320
SPF_FS5_contig_440	6735	3.83464	399	5.94247	555	6.50279	572
SPF_FS5_contig_441	4913	4.82196	366	6.35554	433	5.64161	362
SPF_FS5_contig_442	2893	24.3651	1089	30.1861	1211	29.3776	1110
SPF_FS5_contig_443	1020	64.7276	1020	47.0146	665	47.5916	634
SPF_FS5_contig_444	561	0.576894	5	0.385629	3	0.545932	4
SPF_FS5_contig_445	939	192.184	2788	331.457	4316	344.592	4226
SPF_FS5_contig_447	778	169.556	2038	149.231	1610	182.265	1852
SPF_FS5_contig_448	9820	49.1719	7460	34.4555	4692	35.7026	4579
SPF_FS5_contig_449	3758	8.922	518	9.09564	474	8.92398	438
SPF_FS5_contig_450	1331	36.7649	756	36.6794	677	35.8961	624
SPF_FS5_contig_451	6233	18.6301	1794	24.3422	2104	23.0573	1877
SPF_FS5_contig_452	2279	96.0263	3381	122.962	3886	120.747	3594
SPF_FS5_contig_453	1134	80.8809	1417	86.6751	1363	83.859	1242
SPF_FS5_contig_454	1365	23.3778	493	24.3545	461	23.7273	423
SPF_FS5_contig_455	1302	16.853	339	11.9634	216	12.4083	211
SPF_FS5_contig_456	1919	17.6744	524	21.7202	578	21.5856	541
SPF_FS5_contig_457	2430	65.3136	2452	45.4933	1533	57.4724	1824
SPF_FS5_contig_458	3164	10.0446	491	10.94	480	11.8819	491
SPF_FS5_contig_459	2389	23.2467	858	28.1327	932	28.7807	898
SPF_FS5_contig_460	492	15003.9	114046	13780.1	94017	13618.5	87509
SPF_FS5_contig_461	871	7.87729	106	9.35561	113	10.9884	125
SPF_FS5_contig_462	2350	67.9226	2466	25.2855	824	21.5039	660
SPF_FS5_contig_463	1390	32.7363	703	50.3232	970	42.8004	777
SPF_FS5_contig_464	6636	65.6054	6726	67.8637	6245	70.4402	6105
SPF_FS5_contig_465	1646	21.7856	554	19.5835	447	19.4906	419
SPF_FS5_contig_466	548	0.59058	5	0.394777	3	0.279441	2
SPF_FS5_contig_467	515	999.444	7952	740.45	5288	912.856	6140
SPF_FS5_contig_468	1103	89.9027	1532	116.113	1776	172.571	2486
SPF_FS5_contig_469	4249	20.8243	1367	26.4589	1559	25.264	1402
SPF_FS5_contig_470	2346	202.046	7323	209.176	6805	221.639	6791
SPF_FS5_contig_471	2632	223.89	9104	142.581	5204	146.617	5040
SPF_FS5_contig_473	439	304.028	2062	379.125	2308	490.272	2811
SPF_FS5_contig_474	737	255.309	2907	338.45	3459	330.058	3177
SPF_FS5_contig_475	2415	70.9725	2648	73.7849	2471	71.6844	2261
SPF_FS5_contig_476	1905	46.0058	1354	46.4474	1227	47.6684	1186
SPF_FS5_contig_477	4988	14.3522	1106	15.1078	1045	16.3326	1064
SPF_FS5_contig_478	362	7.33102	41	5.57778	28	8.03741	38
SPF_FS5_contig_479	1084	976.407	16352	494.145	7428	467.312	6616
SPF_FS5_contig_480	505	19.995	156	16.9929	119	25.6234	169
SPF_FS5_contig_481	418	4.64552	30	2.41526	14	3.11397	17
SPF_FS5_contig_482	2520	1.54113	60	2.00313	70	1.6711	55
SPF_FS5_contig_483	2547	74.1559	2918	83.0414	2933	78.2504	2603
SPF_FS5_contig_484	464	1279.49	9172	1386.15	8919	1362.53	8257
SPF_FS5_contig_485	1776	46.3225	1271	66.0221	1626	65.4871	1519
SPF_FS5_contig_486	2328	353.694	12721	414.4	13378	404.443	12297
SPF_FS5_contig_487	619	18.6131	178	20.0378	172	21.1518	171
SPF_FS5_contig_488	1295	915.283	18312	397.037	7130	361.609	6116
SPF_FS5_contig_489	366	7.07405	40	8.66928	44	8.78637	42
SPF_FS5_contig_490	2231	14.6225	504	14.61	452	15.4781	451
SPF_FS5_contig_491	778	91.6835	1102	96.3047	1039	60.0332	610
SPF_FS5_contig_492	3036	22.0449	1034	20.5222	864	21.0836	836
SPF_FS5_contig_493	3388	3.74457	196	4.68264	220	4.24869	188
SPF_FS5_contig_494	1428	253.335	5589	318.498	6307	291.147	5430
SPF_FS5_contig_495	669	1416.46	14640	1551.45	14393	1491.4	13031
SPF_FS5_contig_496	541	217.513	1818	244.863	1837	285.321	2016
SPF_FS5_contig_497	6533	5.28085	533	8.12413	736	6.87965	587
SPF_FS5_contig_498	577	205.288	1830	198.091	1585	186.176	1403
SPF_FS5_contig_499	685	630.739	6675	456.889	4340	603.146	5396
SPF_FS5_contig_500	2281	45.2611	1595	56.6216	1791	55.5874	1656
SPF_FS5_contig_501	528	1514.48	12354	1550.15	11350	1566.87	10805
SPF_FS5_contig_502	5480	17.1859	1455	19.3046	1467	18.7086	1339
SPF_FS5_contig_503	3162	27.1029	1324	46.684	2047	43.2475	1786
SPF_FS5_contig_504	456	5.25202	37	2.84655	18	2.51865	15
SPF_FS5_contig_506	1634	4.79317	121	1.85357	42	2.10864	45
SPF_FS5_contig_507	1463	95.6534	2162	87.5408	1776	81.2771	1553
SPF_FS5_contig_508	1591	83.6047	2055	99.5345	2196	92.6407	1925
SPF_FS5_contig_509	2321	9.42607	338	11.7133	377	10.7543	326
SPF_FS5_contig_510	2331	31.1836	1123	17.6028	569	13.9272	424
SPF_FS5_contig_511	341	31.5096	166	13.5343	64	12.7986	57
SPF_FS5_contig_512	1432	1415.33	31312	1820.64	36154	1657.26	30995
SPF_FS5_contig_513	2123	34.1474	1120	27.8193	819	24.5966	682
SPF_FS5_contig_514	3439	16.2242	862	17.3414	827	15.3846	691
SPF_FS5_contig_516	692	67.4401	721	82.1168	788	67.0514	606
SPF_FS5_contig_517	1479	1527.16	34895	594.6	12195	578.626	11177
SPF_FS5_contig_518	4791	7.98455	591	7.90214	525	9.38108	587
SPF_FS5_contig_519	1021	130.279	2055	108.84	1541	143.16	1909
SPF_FS5_contig_520	1705	97.9076	2579	97.5319	2306	92.8233	2067
SPF_FS5_contig_521	2056	2.4871	79	2.84102	81	2.04824	55
SPF_FS5_contig_522	453	0.857319	6	0.795946	5	0.845109	5
SPF_FS5_contig_523	922	119.416	1701	128.661	1645	121.245	1460
SPF_FS5_contig_524	645	90.2172	899	177.431	1587	199.786	1683
SPF_FS5_contig_525	1586	1.91816	47	2.90997	64	4.34491	90
SPF_FS5_contig_526	783	44.805	542	58.6664	637	61.41	628
SPF_FS5_contig_527	2284	28.7363	1014	47.2016	1495	46.2284	1379
SPF_FS5_contig_528	1041	5.84476	94	5.95744	86	5.36925	73
SPF_FS5_contig_529	5907	10.0592	918	11.8173	968	11.8084	911
SPF_FS5_contig_530	3492	27.7854	1499	25.9994	1259	27.6492	1261
SPF_FS5_contig_531	498	149.471	1150	273.536	1889	337.632	2196
SPF_FS5_contig_532	639	2460.96	24295	2638.15	23377	2598.24	21684
SPF_FS5_contig_533	1958	145.951	4415	115.019	3123	125.682	3214
SPF_FS5_contig_535	2100	13.038	423	13.5984	396	4.8857	134
SPF_FS5_contig_536	2007	5.35365	166	7.36577	205	5.56989	146
SPF_FS5_contig_537	835	11.1626	144	15.0271	174	14.6715	160
SPF_FS5_contig_538	1864	81.0136	2333	85.0342	2198	77.1009	1877
SPF_FS5_contig_539	2451	136.163	5156	194.89	6624	182.092	5829
SPF_FS5_contig_540	3914	4.16744	252	4.93771	268	4.22546	216
SPF_FS5_contig_541	327	11.2828	57	9.92376	45	11.7075	50
SPF_FS5_contig_542	2693	11.6812	486	12.8801	481	11.2306	395
SPF_FS5_contig_543	3553	14.1187	775	14.7148	725	14.4385	670
SPF_FS5_contig_544	7405	18.4611	2112	25.982	2668	27.318	2642
SPF_FS5_contig_545	803	8.38315	104	5.02903	56	5.05361	53
SPF_FS5_contig_546	455	11.6652	82	8.55843	54	8.24567	49
SPF_FS5_contig_547	414	5.47214	35	4.87719	28	1.6645	9
SPF_FS5_contig_548	1956	4.56667	138	11.134	302	9.55129	244
SPF_FS5_contig_549	1965	2.14112	65	3.22947	88	1.87034	48
SPF_FS5_contig_550	598	1.94832	18	3.01474	25	5.24957	41
SPF_FS5_contig_551	1324	18.0885	370	21.5684	396	24.2886	420
SPF_FS5_contig_552	891	814.797	11216	565.409	6986	650.26	7567
SPF_FS5_contig_553	492	2.6312	20	4.83683	33	0.311248	2
SPF_FS5_contig_554	2212	78.5685	2685	88.4456	2713	78.2976	2262
SPF_FS5_contig_555	1960	161.257	4883	181.054	4921	183.37	4694
SPF_FS5_contig_556	660	1286.9	13122	1134.25	10381	1216.6	10487
SPF_FS5_contig_557	2202	84.334	2869	63.0413	1925	66.8657	1923
SPF_FS5_contig_558	5809	7.58813	681	6.44284	519	6.52447	495
SPF_FS5_contig_559	587	865.166	7846	608.842	4956	637.449	4887
SPF_FS5_contig_560	1223	190.901	3607	252.66	4285	252.239	4029
SPF_FS5_contig_561	727	31.696	356	32.535	328	40.2319	382
SPF_FS5_contig_562	1543	112.969	2693	46.8756	1003	51.9047	1046
SPF_FS5_contig_563	1834	115.938	3285	147.607	3754	131.466	3149
SPF_FS5_contig_564	6087	12.3564	1162	15.0931	1274	14.2517	1133
SPF_FS5_contig_565	1199	23.2134	430	27.6061	459	27.6509	433
SPF_FS5_contig_566	1391	56.0259	1204	58.2708	1124	60.3288	1096
SPF_FS5_contig_567	1528	112.468	2655	115.154	2440	114.049	2276
SPF_FS5_contig_568	453	16.2891	114	14.4862	91	11.8315	70
SPF_FS5_contig_569	3698	36.162	2066	39.2934	2015	37.0412	1789
SPF_FS5_contig_570	1521	5.61738	132	8.05993	170	8.10472	161
SPF_FS5_contig_571	680	6.85351	72	4.34797	41	5.85512	52
SPF_FS5_contig_572	1114	1.27828	22	0.906263	14	1.16844	17
SPF_FS5_contig_573	1703	80.6529	2122	73.2136	1729	75.1282	1671
SPF_FS5_contig_574	993	30.4409	467	46.0417	634	42.9484	557
SPF_FS5_contig_575	434	0.894851	6	0.498475	3	0	0
SPF_FS5_contig_576	1914	14.6094	432	10.8131	287	11.281	282
SPF_FS5_contig_577	2155	2.85342	95	3.07859	92	3.30428	93
SPF_FS5_contig_578	4885	148.787	11229	70.7398	4792	81.5199	5201
SPF_FS5_contig_579	1035	83.4892	1335	75.8751	1089	87.8115	1187
SPF_FS5_contig_580	5151	10.1785	810	8.44185	603	8.75518	589
SPF_FS5_contig_581	4050	5.7216	358	6.6771	375	5.02884	266
SPF_FS5_contig_583	10527	2.9022	472	3.22647	471	3.13483	431
SPF_FS5_contig_584	642	88.0174	873	84.0191	748	84.9153	712
SPF_FS5_contig_586	1001	31.4908	487	55.4713	770	57.7503	755
SPF_FS5_contig_587	743	1356.32	15569	1371.69	14133	1372.95	13323
SPF_FS5_contig_588	1300	2391.98	48041	2713.71	48921	2692.5	45715
SPF_FS5_contig_589	544	79.7196	670	86.4292	652	92.0492	654
SPF_FS5_contig_590	1887	34.1303	995	36.9544	967	40.1297	989
SPF_FS5_contig_591	3096	144.508	6912	213.613	9171	170.693	6902
SPF_FS5_contig_592	958	9.52671	141	7.52742	100	9.27115	116
SPF_FS5_contig_593	419	500.519	3240	430.439	2501	448.437	2454
SPF_FS5_contig_595	2616	25.3863	1026	26.5185	962	27.0735	925
SPF_FS5_contig_596	3421	33.5842	1775	29.4269	1396	29.3421	1311
SPF_FS5_contig_597	1277	698.013	13771	949.775	16819	871.676	14538
SPF_FS5_contig_598	631	7.59087	74	12.5711	110	11.7702	97
SPF_FS5_contig_599	2349	300.491	10905	201.633	6568	175.234	5376
SPF_FS5_contig_600	2090	35.7395	1154	35.0557	1016	33.3377	910
SPF_FS5_contig_601	1623	272.51	6833	234.822	5285	254.232	5389
SPF_FS5_contig_602	1215	27.1696	510	47.6003	802	42.9783	682
SPF_FS5_contig_603	3290	33.8787	1722	41.3607	1887	40.0987	1723
SPF_FS5_contig_604	404	1545.29	9645	1672.87	9372	1611.13	8501
SPF_FS5_contig_605	2118	119.89	3923	78.7519	2313	84.9538	2350
SPF_FS5_contig_606	12903	10.9058	2174	9.00919	1612	9.42325	1588
SPF_FS5_contig_607	796	285.013	3505	192.512	2125	83.5887	869
SPF_FS5_contig_608	604	78.7662	735	37.0115	310	82.7785	653
SPF_FS5_contig_609	7608	18.1727	2136	21.412	2259	20.5306	2040
SPF_FS5_contig_610	338	1439.9	7519	1477.24	6924	1529.53	6752
SPF_FS5_contig_611	740	16.8816	193	18.9052	194	15.5203	150
SPF_FS5_contig_612	1362	51.9912	1094	65.5474	1238	58.1841	1035
SPF_FS5_contig_613	1134	745.166	13055	639.984	10064	683.228	10119
SPF_FS5_contig_614	1346	34.8163	724	29.6273	553	34.4153	605
SPF_FS5_contig_615	5158	16.6525	1327	17.6157	1260	16.9373	1141
SPF_FS5_contig_616	1776	702.163	19266	767.7	18907	773.041	17931
SPF_FS5_contig_617	3936	34.8305	2118	35.6899	1948	34.315	1764
SPF_FS5_contig_618	747	1300.53	15009	1384.24	14339	1290.77	12593
SPF_FS5_contig_619	5034	32.4924	2527	48.1897	3364	41.6296	2737
SPF_FS5_contig_620	1212	53.192	996	54.3225	913	54.8982	869
SPF_FS5_contig_621	1294	110.647	2212	115.358	2070	113.43	1917
SPF_FS5_contig_622	704	76.864	836	50.6018	494	59.9267	551
SPF_FS5_contig_623	674	3.16915	33	2.24683	21	2.49922	22
SPF_FS5_contig_624	1352	64.7276	1352	99.5283	1866	102.278	1806
SPF_FS5_contig_625	3512	44.749	2428	69.2791	3374	60.1286	2758
SPF_FS5_contig_626	453	0.285773	2	0.159189	1	0.338044	2
SPF_FS5_contig_627	1677	39.5622	1025	45.3231	1054	47.8486	1048
SPF_FS5_contig_629	922	44.3686	632	57.4868	735	51.2384	617
SPF_FS5_contig_630	2434	8.96187	337	11.6731	394	9.46863	301
SPF_FS5_contig_631	3368	55.8294	2905	46.6334	2178	44.3761	1952
SPF_FS5_contig_632	3275	87.0017	4402	142.244	6460	120.777	5166
SPF_FS5_contig_633	2068	71.1127	2272	110.192	3160	105.446	2848
SPF_FS5_contig_634	3201	22.2634	1101	23.2941	1034	21.9104	916
SPF_FS5_contig_636	6769	36.7672	3845	36.6156	3437	36.9317	3265
SPF_FS5_contig_637	4566	26.3673	1860	18.8099	1191	15.4442	921
SPF_FS5_contig_638	1001	67.6374	1046	77.8759	1081	83.2216	1088
SPF_FS5_contig_639	5368	5.13673	426	4.83617	360	5.06357	355
SPF_FS5_contig_640	1729	1455.38	38876	1860	44596	1820.11	41101
SPF_FS5_contig_641	1677	28.5234	739	20.5975	479	18.2628	400
SPF_FS5_contig_642	7921	12.8376	1571	16.1869	1778	14.2385	1473
SPF_FS5_contig_643	3026	33.305	1557	35.2461	1479	32.6662	1291
SPF_FS5_contig_644	1752	1089.29	29484	1468.55	35679	1369.16	31329
SPF_FS5_contig_645	437	437.837	2956	310.728	1883	268.072	1530
SPF_FS5_contig_646	863	173.257	2310	133.446	1597	155.618	1754
SPF_FS5_contig_647	614	68.3118	648	81.8608	697	16.4606	132
SPF_FS5_contig_648	2125	8.25467	271	8.28023	244	7.17027	199
SPF_FS5_contig_649	1148	122.294	2169	119.664	1905	121.587	1823
SPF_FS5_contig_650	1469	6.69747	152	7.01982	143	8.39161	161
SPF_FS5_contig_651	917	36.4225	516	45.5324	579	48.1779	577
SPF_FS5_contig_652	1097	1527.5	25888	1602.98	24385	1570.63	22503
SPF_FS5_contig_653	1644	411.792	10459	715.381	16309	701.444	15061
SPF_FS5_contig_654	1580	27.4478	670	19.5343	428	18.2694	377
SPF_FS5_contig_655	567	7.99106	70	11.5736	91	4.1862	31
SPF_FS5_contig_656	3598	49.778	2767	54.8561	2737	51.0517	2399
SPF_FS5_contig_657	1535	6.78901	161	5.91935	126	7.73151	155
SPF_FS5_contig_658	2397	12.4757	462	15.4635	514	14.9492	468
SPF_FS5_contig_659	4429	61.3662	4199	73.6757	4525	72.8674	4215
SPF_FS5_contig_660	9310	11.6245	1672	17.9081	2312	19.2199	2337
SPF_FS5_contig_661	1211	699.336	13084	708.026	11890	616.392	9749
SPF_FS5_contig_662	478	35.8845	265	59.8927	397	56.0636	350
SPF_FS5_contig_663	596	0.32581	3	1.33094	11	0.128468	1
SPF_FS5_contig_664	4038	68.2701	4259	47.1643	2641	43.9719	2319
SPF_FS5_contig_665	2402	13.0156	483	19.0339	634	20.7515	651
SPF_FS5_contig_666	2843	1196.67	52561	1420.97	56021	1348.23	50061
SPF_FS5_contig_667	1976	112.651	3439	171.815	4708	145.965	3767
SPF_FS5_contig_668	1791	4.12001	114	3.82507	95	3.50558	82
SPF_FS5_contig_669	822	0.944928	12	0.614098	7	2.04924	22
SPF_FS5_contig_670	1563	3.43723	83	2.49142	54	4.26188	87
SPF_FS5_contig_671	2072	73.3808	2349	93.1339	2676	91.7916	2484
SPF_FS5_contig_672	1400	20.5741	445	26.7332	519	27.3453	500
SPF_FS5_contig_673	2282	9.81408	346	15.7055	497	14.1592	422
SPF_FS5_contig_674	784	1.98146	24	1.65565	18	1.85558	19
SPF_FS5_contig_675	2737	52.0516	2201	66.3163	2517	61.2647	2190
SPF_FS5_contig_676	497	1170.57	8988	665.12	4584	864.728	5613
SPF_FS5_contig_677	2734	6.86576	290	6.98971	265	5.57309	199
SPF_FS5_contig_678	12132	9.31539	1746	11.145	1875	11.8145	1872
SPF_FS5_contig_679	951	883.113	12975	383.16	5053	398.132	4945
SPF_FS5_contig_680	1523	9.94501	234	16.0987	340	12.3673	246
SPF_FS5_contig_681	1997	180.732	5576	88.218	2443	119.854	3126
SPF_FS5_contig_682	512	45.638	361	52.3944	372	49.0507	328
SPF_FS5_contig_683	1940	18.1838	545	23.6411	636	21.9045	555
SPF_FS5_contig_684	2266	9.82625	344	11.0429	347	9.02178	267
SPF_FS5_contig_685	1634	375.412	9477	386.469	8757	383.35	8181
SPF_FS5_contig_686	1695	736.94	19298	730.104	17161	768.244	17007
SPF_FS5_contig_687	936	16.7351	242	18.9527	246	18.3237	224
SPF_FS5_contig_688	2624	5.30352	215	5.99107	218	6.2444	214
SPF_FS5_contig_689	1991	32.0549	986	30.1345	832	29.3423	763
SPF_FS5_contig_690	1123	298.392	5177	326.915	5091	337.29	4947
SPF_FS5_contig_691	3747	4.73321	274	4.90759	255	5.12898	251
SPF_FS5_contig_692	825	1.25532	16	2.18523	25	1.02089	11
SPF_FS5_contig_693	4374	453.981	30678	228.126	13837	260.51	14882
SPF_FS5_contig_694	2207	6.04163	206	2.81001	86	2.70603	78
SPF_FS5_contig_695	3435	4.72973	251	12.5751	599	11.1005	498
SPF_FS5_contig_696	2300	50.2905	1787	34.6768	1106	34.4218	1034
SPF_FS5_contig_697	432	32.8133	219	29.2123	175	36.3338	205
SPF_FS5_contig_698	2536	119.552	4684	225.011	7913	244.374	8094
SPF_FS5_contig_699	3425	36.4553	1929	31.5611	1499	29.8667	1336
SPF_FS5_contig_700	5159	14.4787	1154	15.7113	1124	17.0973	1152
SPF_FS5_contig_701	2645	10.4249	426	13.9045	510	17.3687	600
SPF_FS5_contig_702	5639	45.7535	3986	3.42724	268	6.68043	492
SPF_FS5_contig_703	2889	7.81929	349	7.93764	318	7.2883	275
SPF_FS5_contig_704	406	749.309	4700	909.224	5119	1127	5976
SPF_FS5_contig_705	1528	85.315	2014	94.1052	1994	85.6868	1710
SPF_FS5_contig_706	2102	22.202	721	22.2994	650	21.3091	585
SPF_FS5_contig_707	525	39.3297	319	39.2842	286	28.585	196
SPF_FS5_contig_709	672	44.3076	460	81.8779	763	86.2517	757
SPF_FS5_contig_711	786	18.3642	223	10.5508	115	7.11118	73
SPF_FS5_contig_712	1600	5.62321	139	4.46197	99	4.30689	90
SPF_FS5_contig_713	1141	13.5015	238	33.1175	524	26.7078	398
SPF_FS5_contig_714	3446	5.93555	316	5.41996	259	5.22148	235
SPF_FS5_contig_715	553	19.3129	165	9.5194	73	12.4612	90
SPF_FS5_contig_716	490	125.36	949	96.5427	656	127.039	813
SPF_FS5_contig_717	1171	234.478	4242	235.86	3830	227.216	3475
SPF_FS5_contig_718	1901	9.22734	271	9.29385	245	9.86791	245
SPF_FS5_contig_719	1943	85.0819	2554	101.915	2746	96.2702	2443
SPF_FS5_contig_720	507	3988.21	31239	6254.17	43971	5885.23	38970
SPF_FS5_contig_721	719	41.5913	462	42.726	426	39.0821	367
SPF_FS5_contig_722	4306	147.674	9824	136.187	8132	129.2	7266
SPF_FS5_contig_723	539	2803.46	23345	2907.12	21729	2810.39	19784
SPF_FS5_contig_724	1630	27.9957	705	32.1189	726	27.7144	590
SPF_FS5_contig_725	1955	88.9963	2688	115.86	3141	107.938	2756
SPF_FS5_contig_726	479	1.35131	10	1.95713	13	1.91817	12
SPF_FS5_contig_727	1158	2020.86	36154	1859.8	29865	1845.67	27914
SPF_FS5_contig_728	527	185.708	1512	91.8171	671	86.3012	594
SPF_FS5_contig_729	913	0.708955	10	0.473906	6	0.754767	9
SPF_FS5_contig_730	3271	24.1022	1218	27.6458	1254	27.0126	1154
SPF_FS5_contig_731	3145	8.10895	394	9.49273	414	9.34871	384
SPF_FS5_contig_732	2245	9.57218	332	8.96189	279	8.6287	253
SPF_FS5_contig_733	658	3628.38	36885	2823.03	25759	2148.3	18462
SPF_FS5_contig_734	2394	29.7952	1102	31.9296	1060	28.4008	888
SPF_FS5_contig_735	1394	15.6015	336	16.6573	322	16.0384	292
SPF_FS5_contig_737	458	262.867	1860	354.265	2250	494.509	2958
SPF_FS5_contig_738	2064	0.972168	31	0.663828	19	0.779024	21
SPF_FS5_contig_739	769	237.867	2826	242.032	2581	234.281	2353
SPF_FS5_contig_740	7906	21.7942	2662	18.206	1996	16.1443	1667
SPF_FS5_contig_741	2945	5.62657	256	1.22432	50	1.35195	52
SPF_FS5_contig_742	3781	120.656	7048	108.922	5711	116.359	5746
SPF_FS5_contig_743	4359	19.69	1326	31.8626	1926	31.758	1808
SPF_FS5_contig_744	5443	6.92108	582	8.86338	669	8.00415	569
SPF_FS5_contig_745	1009	563.495	8784	479.632	6711	587.721	7745
SPF_FS5_contig_746	1242	858.813	16479	1040.29	17917	1019.17	16532
SPF_FS5_contig_747	2999	106.966	4956	101.785	4233	94.5661	3704
SPF_FS5_contig_748	1467	908.26	20585	1016.21	20673	980.599	18788
SPF_FS5_contig_749	939	814.781	11820	888.315	11567	899.07	11026
SPF_FS5_contig_750	1493	344.144	7938	251.549	5208	268.164	5229
SPF_FS5_contig_751	2447	87.0529	3291	90.4134	3068	92.4936	2956
SPF_FS5_contig_752	1419	9.71598	213	9.7065	191	9.11896	169
SPF_FS5_contig_753	1414	112.335	2454	69.0017	1353	67.1991	1241
SPF_FS5_contig_754	474	10.5148	77	3.80341	25	5.00754	31
SPF_FS5_contig_755	1337	37.084	766	34.4113	638	37.9685	663
SPF_FS5_contig_756	3644	16.2885	917	15.7722	797	13.5526	645
SPF_FS5_contig_757	533	1661.79	13684	1749.65	12932	1732.02	12057
SPF_FS5_contig_758	2986	17.3633	801	18.2093	754	17.5647	685
SPF_FS5_contig_759	2145	86.3638	2862	111.077	3304	103.66	2904
SPF_FS5_contig_760	3486	16.4883	888	17.6041	851	16.1656	736
SPF_FS5_contig_761	403	3.21229	20	1.61046	9	1.70993	9
SPF_FS5_contig_762	528	2.57439	21	1.7755	13	1.59514	11
SPF_FS5_contig_763	903	1575.54	21980	1813.92	22714	1784.95	21051
SPF_FS5_contig_764	3785	12.6719	741	7.81141	410	8.79963	435
SPF_FS5_contig_765	3518	127.965	6955	117.885	5751	126.037	5791
SPF_FS5_contig_766	938	50.1673	727	39.6697	516	42.5281	521
SPF_FS5_contig_767	14074	8.24616	1793	6.78907	1325	7.33898	1349
SPF_FS5_contig_768	1786	20.1866	557	20.3095	503	19.0346	444
SPF_FS5_contig_769	2777	35.2657	1513	43.0287	1657	37.8837	1374
SPF_FS5_contig_771	902	24.6137	343	46.6894	584	57.9769	683
SPF_FS5_contig_772	1161	618.619	11096	675.35	10873	658.37	9983
SPF_FS5_contig_773	678	14.3203	150	16.9114	159	17.1654	152
SPF_FS5_contig_774	2710	37.0452	1551	47.8977	1800	45.8554	1623
SPF_FS5_contig_775	3661	2.56364	145	2.16673	110	1.63131	78
SPF_FS5_contig_776	6847	15.4469	1634	19.0208	1806	17.4	1556
SPF_FS5_contig_777	1123	49.2229	854	70.3147	1095	68.7261	1008
SPF_FS5_contig_778	2470	1.75577	67	3.09471	106	4.06084	131
SPF_FS5_contig_779	1597	135.454	3342	70.9386	1571	49.2387	1027
SPF_FS5_contig_780	1032	3266.17	52075	1995.54	28558	2045.86	27575
SPF_FS5_contig_781	853	129.227	1703	103.393	1223	137.066	1527
SPF_FS5_contig_783	2720	29.1036	1223	30.2767	1142	27.7837	987
SPF_FS5_contig_784	5193	9.07407	728	10.0261	722	10.3947	705
SPF_FS5_contig_785	1827	18.0684	510	21.6299	548	19.0684	455
SPF_FS5_contig_786	4142	15.6584	1002	20.0564	1152	17.9494	971
SPF_FS5_contig_787	4751	67.1526	4929	97.658	6434	90.1527	5594
SPF_FS5_contig_788	769	497.872	5915	521.387	5560	510.479	5127
SPF_FS5_contig_789	1359	23.6239	496	25.4703	480	21.4658	381
SPF_FS5_contig_790	1332	90.4339	1861	108.819	2010	108.585	1889
SPF_FS5_contig_791	927	325.383	4660	267.758	3442	402.658	4875
SPF_FS5_contig_792	641	816.819	8089	745.539	6627	822.049	6882
SPF_FS5_contig_793	2887	30.402	1356	38.6666	1548	40.5775	1530
SPF_FS5_contig_794	3638	114.723	6448	79.5856	4015	71.1369	3380
SPF_FS5_contig_795	1445	13.6622	305	14.9216	299	14.4126	272
SPF_FS5_contig_796	1442	43.3612	966	36.0563	721	39.9295	752
SPF_FS5_contig_797	3723	14.6389	842	18.0911	934	16.4733	801
SPF_FS5_contig_798	3018	61.5105	2868	59.1381	2475	54.8501	2162
SPF_FS5_contig_799	2964	17.2083	788	14.768	607	13.1486	509
SPF_FS5_contig_800	1172	948.27	17170	986.935	16040	981.65	15026
SPF_FS5_contig_801	2272	28.6887	1007	36.9768	1165	37.0702	1100
SPF_FS5_contig_802	2048	143.836	4551	147.007	4175	145.32	3887
SPF_FS5_contig_803	348	6.13796	33	7.66715	37	9.90089	45
SPF_FS5_contig_804	1452	14.3542	322	18.2268	367	24.3095	461
SPF_FS5_contig_805	507	3.44703	27	3.84032	27	2.26529	15
SPF_FS5_contig_806	2692	17.1918	715	17.0906	638	16.6104	584
SPF_FS5_contig_808	801	65.0508	805	3.15099	35	3.5368	37
SPF_FS5_contig_809	1594	11.573	285	1.5834	35	1.29693	27
SPF_FS5_contig_810	709	1476.04	16168	1813.39	17829	1669.03	15455
SPF_FS5_contig_811	1594	16.2428	400	13.4363	297	13.93	290
SPF_FS5_contig_812	628	88.7427	861	105.298	917	86.4426	709
SPF_FS5_contig_813	336	20.42	106	38.8464	181	41.9295	184
SPF_FS5_contig_814	1919	65.7057	1948	123.219	3279	134.341	3367
SPF_FS5_contig_815	747	77.3785	893	149.438	1548	169.534	1654
SPF_FS5_contig_816	940	7.5745	110	6.44411	84	6.19052	76
SPF_FS5_contig_817	567	4.10969	36	4.32422	34	3.78108	28
SPF_FS5_contig_818	1275	87.4203	1722	101.863	1801	95.3633	1588
SPF_FS5_contig_819	1432	154.316	3414	194.029	3853	172.436	3225
SPF_FS5_contig_820	3825	95.6276	5651	128.559	6819	111.257	5558
SPF_FS5_contig_821	1623	19.5419	490	19.8165	446	22.22	471
SPF_FS5_contig_822	391	1.48989	9	1.10659	6	0.783293	4
SPF_FS5_contig_823	1233	5.45958	104	6.14098	105	5.65092	91
SPF_FS5_contig_824	580	2.56678	23	2.61098	21	3.69633	28
SPF_FS5_contig_825	550	789.205	6706	768.59	5862	791.841	5688
SPF_FS5_contig_827	782	480.573	5806	192.546	2088	265.732	2714
SPF_FS5_contig_828	653	16.5536	167	20.3197	184	18.5261	158
SPF_FS5_contig_829	536	3.62281	30	3.22893	24	5.14255	36
SPF_FS5_contig_830	1049	21.2879	345	25.3666	369	24.8897	341
SPF_FS5_contig_831	478	2024.84	14953	1897.71	12579	1774.65	11079
SPF_FS5_contig_832	2203	33.4656	1139	35.9418	1098	30.9326	890
SPF_FS5_contig_833	15374	4.85436	1153	5.5677	1187	5.47333	1099
SPF_FS5_contig_834	17675	5.7971	1583	5.25494	1288	5.48856	1267
SPF_FS5_contig_835	3171	32.1495	1575	39.3652	1731	37.0641	1535
SPF_FS5_contig_836	602	1043.6	9706	1539.04	12848	352.182	2769
SPF_FS5_contig_837	695	114.833	1233	145.159	1399	115.566	1049
SPF_FS5_contig_838	1353	62.6226	1309	117.31	2201	121.952	2155
SPF_FS5_contig_839	486	136.114	1022	114.846	774	107.288	681
SPF_FS5_contig_841	472	171.693	1252	216.185	1415	217.697	1342
SPF_FS5_contig_842	4698	238.354	17300	235.049	15313	241.174	14798
SPF_FS5_contig_843	3958	68.6851	4200	60.0696	3297	60.9363	3150
SPF_FS5_contig_844	463	105.689	756	136.749	878	118.406	716
SPF_FS5_contig_845	541	1608.38	13443	1794.69	13464	1773.92	12534
SPF_FS5_contig_846	2021	244.049	7620	196.749	5514	195.225	5153
SPF_FS5_contig_847	879	40.5744	551	32.9799	402	36.4107	418
SPF_FS5_contig_848	634	13.5785	133	15.8102	139	17.3906	144
SPF_FS5_contig_849	667	3.59058	37	4.97329	46	6.88758	60
SPF_FS5_contig_850	2580	13.7483	548	17.1617	614	16.9159	570
SPF_FS5_contig_851	390	1059.87	6386	1130.87	6116	1104.53	5626
SPF_FS5_contig_852	1470	103.256	2345	65.2939	1331	68.181	1309
SPF_FS5_contig_853	801	1562.75	19339	1684.79	18714	1668.32	17453
SPF_FS5_contig_854	335	92.5508	479	75.3416	350	91.8803	402
SPF_FS5_contig_855	612	66.6313	630	65.3963	555	71.6876	573
SPF_FS5_contig_856	420	84.9164	551	98.8974	576	102.636	563
SPF_FS5_contig_857	1336	149.949	3095	176.719	3274	165.513	2888
SPF_FS5_contig_858	2235	35.2454	1217	34.0398	1055	25.214	736
SPF_FS5_contig_859	3334	43.5853	2245	52.1487	2411	47.2859	2059
SPF_FS5_contig_860	3070	19.3128	916	19.6607	837	17.4084	698
SPF_FS5_contig_861	553	442.676	3782	548.213	4204	478.785	3458
SPF_FS5_contig_862	1103	54.5754	930	9.41453	144	12.2174	176
SPF_FS5_contig_863	5035	24.0141	1868	26.2241	1831	26.5817	1748
SPF_FS5_contig_864	7954	30.7769	3782	29.8007	3287	29.3696	3051
SPF_FS5_contig_865	512	1.01137	8	0.140845	1	0	0
SPF_FS5_contig_866	3551	2.36964	130	3.57416	176	3.06181	142
SPF_FS5_contig_867	729	104.683	1179	163.812	1656	89.6957	854
SPF_FS5_contig_868	787	412.052	5010	471.436	5145	617.594	6348
SPF_FS5_contig_869	4659	57.5449	4142	67.0204	4330	26.9192	1638
SPF_FS5_contig_870	2781	4.70153	202	2.98201	115	3.9371	143
SPF_FS5_contig_871	2358	212.053	7725	248.113	8113	247.82	7632
SPF_FS5_contig_872	2816	52.2234	2272	36.927	1442	45.6791	1680
SPF_FS5_contig_873	1759	6.14525	167	5.94448	145	5.26697	121
SPF_FS5_contig_874	3006	16.5802	770	15.5213	647	14.6715	576
SPF_FS5_contig_875	2461	144.762	5504	143.405	4894	136.053	4373
SPF_FS5_contig_876	3389	18.2398	955	17.9377	843	16.6057	735
SPF_FS5_contig_877	826	353.494	4511	160.9	1843	204.765	2209
SPF_FS5_contig_878	3123	18.4462	890	22.9754	995	23.1196	943
SPF_FS5_contig_879	2028	10.5964	332	9.35189	263	8.8724	235
SPF_FS5_contig_880	342	0.378524	2	0.210856	1	0.67164	3
SPF_FS5_contig_881	1608	105.182	2613	104.492	2330	90.4708	1900
SPF_FS5_contig_882	5472	71.9905	6086	64.2715	4877	74.3701	5315
SPF_FS5_contig_883	1425	508.918	11204	424.023	8379	412.978	7686
SPF_FS5_contig_886	1091	15.3068	258	6.80807	103	9.12346	130
SPF_FS5_contig_887	542	13.0172	109	12.7727	96	13.4204	95
SPF_FS5_contig_888	600	194.722	1805	209.608	1744	211.963	1661
SPF_FS5_contig_889	819	10.8274	137	13.2075	150	11.873	127
SPF_FS5_contig_890	2106	25.264	822	32.0843	937	22.2502	612
SPF_FS5_contig_891	3770	24.8094	1445	27.9652	1462	28.5958	1408
SPF_FS5_contig_892	2582	270.492	10790	342.828	12275	375.124	12650
SPF_FS5_contig_893	4639	150.957	10819	137.292	8832	155.808	9440
SPF_FS5_contig_894	734	55.4682	629	93.2356	949	94.9263	910
SPF_FS5_contig_895	723	29.0961	325	55.5557	557	26.4754	250
SPF_FS5_contig_896	1117	4.34608	75	2.71149	42	2.12495	31
SPF_FS5_contig_897	2299	10.7832	383	10.6648	340	13.5216	406
SPF_FS5_contig_898	1192	3.3667	62	4.59779	76	4.23944	66
SPF_FS5_contig_899	2545	213.944	8412	158.308	5587	173.381	5763
SPF_FS5_contig_900	2704	34.8294	1455	30.3225	1137	28.8542	1019
SPF_FS5_contig_901	1471	136.364	3099	229.035	4672	210.234	4039
SPF_FS5_contig_902	321	63.5177	315	92.7805	413	88.0162	369
SPF_FS5_contig_903	528	0.61295	5	0.273154	2	0.290026	2
SPF_FS5_contig_904	1368	144.454	3053	178.595	3388	153.973	2751
SPF_FS5_contig_905	6904	4.64081	495	5.8179	557	6.95357	627
SPF_FS5_contig_906	1045	163.336	2637	222.549	3225	186.032	2539
SPF_FS5_contig_907	840	467.503	6067	630.9	7349	596.402	6543
SPF_FS5_contig_908	1994	16.8473	519	17.0698	472	18.8153	490
SPF_FS5_contig_909	1359	70.2525	1475	60.1204	1133	61.9747	1100
SPF_FS5_contig_910	778	996.372	11976	1081.41	11667	1034.24	10509
SPF_FS5_contig_911	10573	56.7384	9268	71.5807	10495	65.7405	9078
SPF_FS5_contig_912	6261	11.3617	1099	11.4602	995	11.3365	927
SPF_FS5_contig_913	2589	24.226	969	28.5498	1025	24.8125	839
SPF_FS5_contig_914	1577	411.227	10019	422.707	9244	438.087	9023
SPF_FS5_contig_915	1959	28.6797	868	22.0866	600	24.2716	621
SPF_FS5_contig_916	1643	12.6461	321	8.86595	202	14.9592	321
SPF_FS5_contig_917	7208	28.8975	3218	29.5734	2956	28.8613	2717
SPF_FS5_contig_918	1385	1495.14	31992	1569.97	30153	1513.87	27384
SPF_FS5_contig_919	3975	14.1179	867	11.8283	652	13.1945	685
SPF_FS5_contig_920	3799	21.7065	1274	23.9743	1263	22.4319	1113
SPF_FS5_contig_921	1496	20.6384	477	11.6171	241	15.3031	299
SPF_FS5_contig_922	1445	76.7772	1714	71.7633	1438	69.0957	1304
SPF_FS5_contig_923	3319	137.529	7052	163.019	7503	155.187	6727
SPF_FS5_contig_924	6008	19.1446	1777	20.5007	1708	21.7925	1710
SPF_FS5_contig_925	447	29.6849	205	30.9746	192	31.3462	183
SPF_FS5_contig_927	3388	23.4227	1226	23.1365	1087	22.6898	1004
SPF_FS5_contig_928	395	53.5846	327	103.331	566	121.732	628
SPF_FS5_contig_929	725	59.7279	669	76.4892	769	43.0887	408
SPF_FS5_contig_930	801	31.4345	389	45.0142	500	24.2796	254
SPF_FS5_contig_931	2510	21.5329	835	13.6468	475	13.5746	445
SPF_FS5_contig_932	2989	36.4458	1683	40.5558	1681	41.8569	1634
SPF_FS5_contig_933	1457	4.84235	109	7.72106	156	4.36174	83
SPF_FS5_contig_934	1493	3.42497	79	3.57424	74	2.71805	53
SPF_FS5_contig_935	4588	13.981	991	16.9751	1080	17.6731	1059
SPF_FS5_contig_936	2578	56.9693	2269	68.9518	2465	66.6768	2245
SPF_FS5_contig_937	1888	16.8333	491	18.9449	496	20.9261	516
SPF_FS5_contig_938	1793	566.267	15686	780.812	19414	664.163	15553
SPF_FS5_contig_939	1393	92.2821	1986	81.845	1581	83.3277	1516
SPF_FS5_contig_941	1370	4.96087	105	6.10589	116	6.14771	110
SPF_FS5_contig_942	2434	11.6744	439	9.62885	325	11.4504	364
SPF_FS5_contig_943	3181	25.7608	1266	25.7982	1138	24.9125	1035
SPF_FS5_contig_944	343	429.693	2277	454.541	2162	525.923	2356
SPF_FS5_contig_945	2290	301.223	10657	408.838	12983	376.582	11263
SPF_FS5_contig_946	2191	76.3968	2586	94.0657	2858	87.0507	2491
SPF_FS5_contig_947	1682	16.9323	440	17.3208	404	14.7034	323
SPF_FS5_contig_948	1563	48.8252	1179	33.9571	736	35.7606	730
SPF_FS5_contig_949	1548	20.7396	496	21.8481	469	23.5933	477
SPF_FS5_contig_950	4330	19.5977	1311	14.7556	886	17.6298	997
SPF_FS5_contig_951	2081	60.2175	1936	111.79	3226	124.84	3393
SPF_FS5_contig_952	904	834.441	11654	876.44	10987	874.591	10326
SPF_FS5_contig_953	630	3743.72	36438	2709.49	23671	2743.04	22570
SPF_FS5_contig_954	1596	1549.28	38201	735.992	16289	739.379	15412
SPF_FS5_contig_955	2188	111.972	3785	238.025	7222	211.959	6057
SPF_FS5_contig_956	1246	118.13	2274	111.642	1929	114.482	1863
SPF_FS5_contig_957	2577	94.9689	3781	118.453	4233	108.477	3651
SPF_FS5_contig_958	720	60.2326	670	74.7167	746	64.6565	608
SPF_FS5_contig_959	871	12.1132	163	10.5147	127	7.55999	86
SPF_FS5_contig_960	1728	67.9864	1815	116.515	2792	102.532	2314
SPF_FS5_contig_961	991	63.4866	972	60.1788	827	59.8783	775
SPF_FS5_contig_962	1801	526.985	14663	451.055	11265	478.235	11249
SPF_FS5_contig_963	507	627.998	4919	548.739	3858	652.253	4319
SPF_FS5_contig_964	1496	579.692	13398	399.271	8283	419.429	8195
SPF_FS5_contig_965	904	0.930817	13	0.797707	10	0.508187	6
SPF_FS5_contig_966	1234	50.8274	969	69.5998	1191	63.661	1026
SPF_FS5_contig_967	1022	88.2246	1393	118.4	1678	116.873	1560
SPF_FS5_contig_968	3998	6.34647	392	9.23504	512	7.90949	413
SPF_FS5_contig_969	1829	80.9006	2286	83.2312	2111	73.4691	1755
SPF_FS5_contig_970	4404	9.2153	627	9.59537	586	8.60595	495
SPF_FS5_contig_971	1076	10.5874	176	8.51144	127	8.4679	119
SPF_FS5_contig_973	1421	31.7488	697	35.5235	700	36.1012	670
SPF_FS5_contig_974	2690	10.1302	421	9.99927	373	9.25065	325
SPF_FS5_contig_975	1774	6.60411	181	4.39017	108	4.96347	115
SPF_FS5_contig_976	1179	86.6328	1578	107.16	1752	99.7513	1536
SPF_FS5_contig_977	1779	43.2245	1188	28.2938	698	31.5908	734
SPF_FS5_contig_978	503	10.6807	83	20.3579	142	18.8753	124
SPF_FS5_contig_979	756	33.5624	392	36.3425	381	44.0564	435
SPF_FS5_contig_980	317	10.2094	50	17.7438	78	16.9075	70
SPF_FS5_contig_981	487	7.04427	53	9.32875	63	15.8794	101
SPF_FS5_contig_982	1210	35.4129	662	10.5487	177	11.137	176
SPF_FS5_contig_983	1115	41.9133	722	17.3329	268	19.7769	288
SPF_FS5_contig_984	2133	32.7128	1078	40.6373	1202	39.0552	1088
SPF_FS5_contig_985	1150	9.79356	174	11.538	184	11.3852	171
SPF_FS5_contig_986	1186	26.1421	479	31.8001	523	30.2136	468
SPF_FS5_contig_987	1556	1.78874	43	0.231725	5	0.098415	2
SPF_FS5_contig_988	419	298.612	1933	389.477	2263	518.791	2839
SPF_FS5_contig_989	2387	11.0094	406	11.1477	369	10.1041	315
SPF_FS5_contig_990	469	12145.2	88001	9781.65	63617	10377	63563
SPF_FS5_contig_991	1505	25.4609	592	30.1388	629	30.0163	590
SPF_FS5_contig_992	1815	64.05	1796	68.4177	1722	72.6436	1722
SPF_FS5_contig_993	2446	7.96525	301	8.7856	298	10.3613	331
SPF_FS5_contig_994	364	0.355646	2	0.990559	5	0	0
SPF_FS5_contig_995	3956	14.4966	886	15.5308	852	13.7031	708
SPF_FS5_contig_996	492	1998	15187	1412.79	9639	1418.67	9116
SPF_FS5_contig_997	1064	92.7721	1525	108.508	1601	111.036	1543
SPF_FS5_contig_998	1317	228.979	4659	360.071	6576	343.301	5905
SPF_FS5_contig_999	5397	14.6557	1222	18.9601	1419	17.606	1241
SPF_FS5_contig_1000	3193	16.9269	835	12.6474	560	14.5077	605
SPF_FS5_contig_1001	5184	5.90589	473	4.68788	337	5.34669	362
SPF_FS5_contig_1002	1953	12.1302	366	7.38481	200	7.95857	203
SPF_FS5_contig_1003	546	58.3259	492	77.924	590	93.1143	664
SPF_FS5_contig_1004	1607	2.98061	74	3.32068	74	5.1934	109
SPF_FS5_contig_1005	1113	4.3617	75	2.85082	44	1.995	29
SPF_FS5_contig_1006	2384	7.73798	285	2.60138	86	2.24819	70
SPF_FS5_contig_1007	2128	14.3873	473	14.2667	421	14.6441	407
SPF_FS5_contig_1008	1756	257.694	6991	258.226	6288	275.615	6321
SPF_FS5_contig_1009	802	66.6645	826	74.9001	833	76.185	798
SPF_FS5_contig_1010	583	847.454	7633	913.963	7389	888.859	6768
SPF_FS5_contig_1011	1827	34.9678	987	41.7204	1057	40.1903	959
SPF_FS5_contig_1012	500	53.2061	411	53.9403	374	50.381	329
SPF_FS5_contig_1013	862	185.322	2468	184.799	2209	202.964	2285
SPF_FS5_contig_1014	3194	12.22	603	5.37346	238	6.1848	258
SPF_FS5_contig_1015	1555	11.447	275	19.1064	412	31.6608	643
SPF_FS5_contig_1016	353	1678.15	9152	1700.47	8324	1645.65	7587
SPF_FS5_contig_1017	767	54.4319	645	65.6254	698	58.8976	590
SPF_FS5_contig_1018	9218	11.3824	1621	11.7971	1508	12.3846	1491
SPF_FS5_contig_1019	3270	92.6574	4681	81.9262	3715	83.4743	3565
SPF_FS5_contig_1020	948	18.913	277	22.3641	294	19.7879	245
SPF_FS5_contig_1021	328	190.236	964	240.522	1094	216.628	928
SPF_FS5_contig_1022	866	1547.78	20708	1638.94	19682	1639.65	18545
SPF_FS5_contig_1023	1044	207.637	3349	223.798	3240	218.04	2973
SPF_FS5_contig_1024	1411	15.7346	343	17.8876	350	19.0468	351
SPF_FS5_contig_1025	508	0.891915	7	0.141954	1	0	0
SPF_FS5_contig_1026	354	0.548539	3	0.611124	3	0.648872	3
SPF_FS5_contig_1027	2514	17.4821	679	23.1483	807	22.1721	728
SPF_FS5_contig_1028	2251	5.54972	193	5.41406	169	5.54438	163
SPF_FS5_contig_1029	1228	313.149	5941	386.049	6574	375.29	6019
SPF_FS5_contig_1030	1799	7.8076	217	8.17731	204	8.04399	189
SPF_FS5_contig_1031	12581	11.0306	2144	14.857	2592	13.1151	2155
SPF_FS5_contig_1032	1372	186.681	3957	271.211	5160	245.159	4393
SPF_FS5_contig_1033	4033	15.1828	946	19.7224	1103	16.3652	862
SPF_FS5_contig_1034	1289	773.919	15412	684.707	12239	698.903	11766
SPF_FS5_contig_1036	1203	6.45661	120	4.85547	81	7.89218	124
SPF_FS5_contig_1037	370	0	0	0.974496	5	0.413875	2
SPF_FS5_contig_1038	1566	194.224	4699	240.652	5226	242.951	4969
SPF_FS5_contig_1039	1705	12.2622	323	8.58585	203	8.48748	189
SPF_FS5_contig_1040	1044	15.4999	250	15.8869	230	14.228	194
SPF_FS5_contig_1041	3404	9.05121	476	10.0839	476	10.3694	461
SPF_FS5_contig_1042	308	6.9351	33	5.8533	25	5.22047	21
SPF_FS5_contig_1044	3082	94.0671	4479	124.735	5331	122.08	4914
SPF_FS5_contig_1045	1155	363.203	6481	164.642	2637	166.26	2508
SPF_FS5_contig_1046	1516	132.23	3097	191.127	4018	166.669	3300
SPF_FS5_contig_1047	891	2.39732	33	2.75177	34	1.71867	20
SPF_FS5_contig_1048	2199	11.0381	375	12.5271	382	11.5599	332
SPF_FS5_contig_1049	2863	43.7923	1937	52.7684	2095	58.622	2192
SPF_FS5_contig_1050	1332	50.4894	1039	47.0465	869	50.6997	882
SPF_FS5_contig_1051	351	21.0226	114	12.9433	63	13.3065	61
SPF_FS5_contig_1052	373	153.75	886	94.3458	488	70.2034	342
SPF_FS5_contig_1054	1399	45.1566	976	38.2986	743	41.4851	758
SPF_FS5_contig_1055	959	7.96439	118	11.3546	151	13.8922	174
SPF_FS5_contig_1056	589	261.108	2376	346.116	2827	301.198	2317
SPF_FS5_contig_1057	1169	28.9585	523	30.4119	493	23.4482	358
SPF_FS5_contig_1058	1258	244.812	4758	322.329	5623	352.22	5787
SPF_FS5_contig_1059	4828	18.9035	1410	19.5666	1310	20.0457	1264
SPF_FS5_contig_1060	967	1.00405	15	0.671162	9	0.791798	10
SPF_FS5_contig_1061	2887	14.9095	665	14.6374	586	14.3745	542
SPF_FS5_contig_1062	1486	89.4251	2053	125.348	2583	109.749	2130
SPF_FS5_contig_1063	545	41.2119	347	67.7462	512	63.3609	451
SPF_FS5_contig_1064	1043	21.2862	343	12.5834	182	13.067	178
SPF_FS5_contig_1065	926	192.365	2752	78.3427	1006	100.628	1217
SPF_FS5_contig_1066	577	74.0385	660	19.1217	153	52.0177	392
SPF_FS5_contig_1067	1425	3.22502	71	1.97361	39	2.95521	55
SPF_FS5_contig_1068	4302	12.5032	831	17.299	1032	17.6734	993
SPF_FS5_contig_1069	1092	40.9586	691	48.4713	734	48.7308	695
SPF_FS5_contig_1070	2461	11.2307	427	11.252	384	11.3559	365
SPF_FS5_contig_1071	4397	58.8245	3996	43.3135	2641	38.2747	2198
SPF_FS5_contig_1072	841	535.138	6953	317.09	3698	384.291	4221
SPF_FS5_contig_1073	829	493.538	6321	511.661	5882	465.774	5043
SPF_FS5_contig_1074	1765	4.03401	110	4.12656	101	4.68511	108
SPF_FS5_contig_1075	303	12.8173	60	12.3758	52	17.1833	68
SPF_FS5_contig_1076	6265	8.28595	802	8.70187	756	7.67502	628
SPF_FS5_contig_1077	623	250.079	2407	404.896	3498	405.694	3301
SPF_FS5_contig_1078	1383	41.186	880	28.6261	549	27.7368	501
SPF_FS5_contig_1079	1530	63.6699	1505	74.705	1585	76.5669	1530
SPF_FS5_contig_1080	2986	130.647	6027	149.707	6199	140.646	5485
SPF_FS5_contig_1081	1362	76.1333	1602	78.0427	1474	71.1701	1266
SPF_FS5_contig_1082	1071	5.6206	93	4.91524	73	3.71753	52
SPF_FS5_contig_1083	1009	0.769803	12	2.00114	28	2.95947	39
SPF_FS5_contig_1084	1428	1.13319	25	1.71697	34	1.60855	30
SPF_FS5_contig_1085	1929	54.9295	1637	82.5427	2208	73.6297	1855
SPF_FS5_contig_1086	417	364.616	2349	208.729	1207	281.113	1531
SPF_FS5_contig_1087	3120	36.4715	1758	15.7862	683	14.479	590
SPF_FS5_contig_1089	1550	88.9482	2130	90.3037	1941	89.608	1814
SPF_FS5_contig_1090	1522	63.2391	1487	78.6038	1659	67.7129	1346
SPF_FS5_contig_1091	1360	298.556	6273	300.222	5662	309.42	5496
SPF_FS5_contig_1092	6781	19.9881	2094	19.9716	1878	19.0937	1691
SPF_FS5_contig_1093	7452	12.9334	1489	16.4508	1700	15.6072	1519
SPF_FS5_contig_1094	2736	7.90168	334	7.74895	294	8.0037	286
SPF_FS5_contig_1095	1883	445.255	12953	283.51	7403	303.381	7461
SPF_FS5_contig_1096	1260	16.6956	325	15.5672	272	17.0149	280
SPF_FS5_contig_1097	667	270.458	2787	730.641	6758	941.647	8203
SPF_FS5_contig_1098	467	125.02	902	163.373	1058	94.9298	579
SPF_FS5_contig_1099	1726	21.6759	578	16.0018	383	16.591	374
SPF_FS5_contig_1100	2138	6.75128	223	7.92632	235	6.91179	193
SPF_FS5_contig_1101	8104	6.85294	858	5.83735	656	5.26256	557
SPF_FS5_contig_1102	676	4.30879	45	2.02684	19	2.83162	25
SPF_FS5_contig_1103	5172	10.5627	844	12.1303	870	12.4207	839
SPF_FS5_contig_1104	5037	13.146	1023	16.3639	1143	17.6178	1159
SPF_FS5_contig_1105	427	313.178	2066	280.682	1662	375.841	2096
SPF_FS5_contig_1106	1025	766.059	12131	561.424	7980	641.817	8592
SPF_FS5_contig_1107	2050	88.9136	2816	96.3848	2740	98.7526	2644
SPF_FS5_contig_1108	807	60.3963	753	37.9776	425	41.0824	433
SPF_FS5_contig_1109	1137	872.598	15328	737.236	11624	937.658	13924
SPF_FS5_contig_1110	543	70.4493	591	71.1831	536	62.3252	442
SPF_FS5_contig_1111	2963	6.90311	316	8.42085	346	8.13992	315
SPF_FS5_contig_1112	3363	20.9407	1088	24.9596	1164	22.1072	971
SPF_FS5_contig_1113	1199	1487.01	27545	1519.24	25260	1543.09	24164
SPF_FS5_contig_1114	1989	41.9802	1290	43.2894	1194	38.3412	996
SPF_FS5_contig_1115	1422	652.192	14328	542.519	10698	526.384	9776
SPF_FS5_contig_1116	1924	28.6631	852	11.8064	315	14.1673	356
SPF_FS5_contig_1117	5640	35.7953	3119	56.6928	4434	66.8467	4924
SPF_FS5_contig_1118	1259	1.64518	32	1.60378	28	1.64202	27
SPF_FS5_contig_1119	2621	41.9828	1700	63.2809	2300	61.0549	2090
SPF_FS5_contig_1121	2809	13.3879	581	17.8164	694	17.3086	635
SPF_FS5_contig_1123	638	613.897	6051	594.421	5259	579.532	4829
SPF_FS5_contig_1124	2206	50.0568	1706	53.3817	1633	54.6311	1574
SPF_FS5_contig_1125	1607	342.045	8492	385.334	8587	385.979	8101
SPF_FS5_contig_1126	565	195.557	1707	231.271	1812	170.751	1260
SPF_FS5_contig_1127	1276	39.9728	788	29.6137	524	38.7035	645
SPF_FS5_contig_1128	2427	16.1085	604	16.6391	560	17.6038	558
SPF_FS5_contig_1129	2313	21.4359	766	21.0757	676	22.1127	668
SPF_FS5_contig_1130	456	4.54228	32	3.16284	20	5.0373	30
SPF_FS5_contig_1131	528	3.30993	27	2.04866	15	2.75525	19
SPF_FS5_contig_1132	462	15.6915	112	16.0771	103	13.0926	79
SPF_FS5_contig_1133	3555	23.8336	1309	30.1839	1488	28.3868	1318
SPF_FS5_contig_1134	877	798.651	10821	839.533	10210	813.251	9315
SPF_FS5_contig_1135	1668	12.767	329	6.96052	161	7.11503	155
SPF_FS5_contig_1136	3611	182.962	10207	245.495	12293	217.063	10237
SPF_FS5_contig_1137	1377	48.1814	1025	48.337	923	52.9908	953
SPF_FS5_contig_1138	1740	16.1075	433	16.3704	395	14.6973	334
SPF_FS5_contig_1139	1787	47.124	1301	49.2723	1221	49.7878	1162
SPF_FS5_contig_1140	14132	15.5223	3389	11.7415	2301	12.4126	2291
SPF_FS5_contig_1141	2470	26.0483	994	42.1582	1444	38.6864	1248
SPF_FS5_contig_1142	2738	16.9029	715	17.9887	683	19.9667	714
SPF_FS5_contig_1143	2045	33.9938	1074	47.6755	1352	43.0572	1150
SPF_FS5_contig_1144	1779	78.9538	2170	76.2878	1882	72.1339	1676
SPF_FS5_contig_1146	1821	239.574	6740	325.398	8217	306.94	7300
SPF_FS5_contig_1147	1313	37.9097	769	32.2942	588	28.9823	497
SPF_FS5_contig_1148	1427	57.4247	1266	60.793	1203	59.8263	1115
SPF_FS5_contig_1149	3165	141.296	6909	155.64	6831	140.167	5794
SPF_FS5_contig_1150	1489	484.522	11146	618.164	12764	589.601	11466
SPF_FS5_contig_1151	2375	44.7233	1641	49.4921	1630	48.0034	1489
SPF_FS5_contig_1153	3174	49.9426	2449	55.6635	2450	52.492	2176
SPF_FS5_contig_1154	4627	13.7233	981	15.6319	1003	15.4888	936
SPF_FS5_contig_1155	622	99.9011	960	121.154	1045	108.203	879
SPF_FS5_contig_1156	585	505.981	4573	420.596	3412	741.586	5666
SPF_FS5_contig_1157	1411	194.825	4247	112.896	2209	94.5827	1743
SPF_FS5_contig_1158	1132	54.378	951	49.3067	774	36.5925	541
SPF_FS5_contig_1159	2335	3.07698	111	2.5942	84	2.09862	64
SPF_FS5_contig_1160	3007	6.47921	301	5.70762	238	5.06711	199
SPF_FS5_contig_1161	14376	11.9135	2646	13.3631	2664	13.347	2506
SPF_FS5_contig_1162	811	8.93895	112	6.75779	76	5.85345	62
SPF_FS5_contig_1163	649	116.29	1166	101.336	912	105.707	896
SPF_FS5_contig_1164	1206	1.77115	33	0.956719	16	1.20628	19
SPF_FS5_contig_1165	12077	7.71243	1439	3.72595	624	3.64544	575
SPF_FS5_contig_1166	1807	6.19694	173	7.06361	177	7.6694	181
SPF_FS5_contig_1167	577	404.968	3610	490.666	3926	379.915	2863
SPF_FS5_contig_1168	1145	189.208	3347	174.267	2767	162.496	2430
SPF_FS5_contig_1169	794	33.0159	405	42.868	472	36.3548	377
SPF_FS5_contig_1170	1067	755.681	12457	795.335	11768	787.197	10970
SPF_FS5_contig_1171	955	27.7888	410	20.992	278	18.9212	236
SPF_FS5_contig_1172	466	5.00041	36	9.43964	61	8.21533	50
SPF_FS5_contig_1173	3017	99.226	4625	115.471	4831	108.899	4291
SPF_FS5_contig_1174	800	371.779	4595	434.93	4825	417.577	4363
SPF_FS5_contig_1175	1231	6.7304	128	5.68232	97	5.22471	84
SPF_FS5_contig_1176	432	2277	15197	1720.19	10305	1829.28	10321
SPF_FS5_contig_1177	4843	18.8449	1410	20.5334	1379	18.45	1167
SPF_FS5_contig_1178	1069	49.2269	813	57.0021	845	58.6607	819
SPF_FS5_contig_1179	754	94.1726	1097	110.177	1152	104.797	1032
SPF_FS5_contig_1180	436	56.2655	379	32.583	197	27.2199	155
SPF_FS5_contig_1181	397	50.869	312	16.348	90	16.0077	83
SPF_FS5_contig_1182	4894	15.3685	1162	20.2458	1374	18.2734	1168
SPF_FS5_contig_1183	2303	54.8062	1950	70.5157	2252	72.8433	2191
SPF_FS5_contig_1184	2935	23.2005	1052	24.4962	997	24.4179	936
SPF_FS5_contig_1185	1179	129.345	2356	127.161	2079	123.78	1906
SPF_FS5_contig_1186	4334	19.2958	1292	20.0498	1205	19.2919	1092
SPF_FS5_contig_1187	465	1.80959	13	0.775405	5	0.98796	6
SPF_FS5_contig_1188	893	1239.9	17106	1242.39	15385	1179.46	13756
SPF_FS5_contig_1189	1231	6.4675	123	7.26399	124	3.23435	52
SPF_FS5_contig_1190	943	251.634	3666	244.48	3197	262.909	3238
SPF_FS5_contig_1191	1594	69.9253	1722	72.746	1608	73.1084	1522
SPF_FS5_contig_1192	2595	59.8138	2398	102.542	3690	93.5621	3171
SPF_FS5_contig_1193	440	27.9505	190	20.6504	126	9.74488	56
SPF_FS5_contig_1194	638	0.405815	4	0.791205	7	0.720065	6
SPF_FS5_contig_1195	1553	136.249	3269	146.268	3150	138.54	2810
SPF_FS5_contig_1196	13262	5.51517	1130	6.49243	1194	6.21796	1077
SPF_FS5_contig_1197	894	147.556	2038	75.8232	940	100.633	1175
SPF_FS5_contig_1198	985	263.51	4010	230.98	3155	219.362	2822
SPF_FS5_contig_1199	2952	13.0244	594	16.5869	679	16.4702	635
SPF_FS5_contig_1200	2015	20.2374	630	29.3819	821	26.3709	694
SPF_FS5_contig_1201	906	116.667	1633	95.3543	1198	98.3707	1164
SPF_FS5_contig_1202	566	810.352	7086	923.45	7248	887.013	6557
SPF_FS5_contig_1203	808	736.436	9193	393.496	4409	393.258	4150
SPF_FS5_contig_1204	339	142.057	744	100.83	474	163.072	722
SPF_FS5_contig_1205	830	270.218	3465	184.539	2124	234.129	2538
SPF_FS5_contig_1206	3558	14.39	791	16.579	818	15.8385	736
SPF_FS5_contig_1207	6941	20.8982	2241	26.8046	2580	28.2838	2564
SPF_FS5_contig_1208	1540	175.353	4172	118.003	2520	116.392	2341
SPF_FS5_contig_1209	1425	880.204	19378	977.646	19319	973.77	18123
SPF_FS5_contig_1210	1279	15.0306	297	13.2498	235	12.3321	206
SPF_FS5_contig_1211	2037	6.35519	200	8.46094	239	8.30696	221
SPF_FS5_contig_1212	3386	8.75523	458	7.02811	330	8.6607	383
SPF_FS5_contig_1214	5131	7.27885	577	8.22177	585	7.08815	475
SPF_FS5_contig_1215	2120	14.3805	471	12.7558	375	13.038	361
SPF_FS5_contig_1216	2113	70.3028	2295	98.2207	2878	96.9316	2675
SPF_FS5_contig_1217	2037	3.71778	117	3.04452	86	2.06734	55
SPF_FS5_contig_1218	568	466.54	4094	254.045	2001	260.705	1934
SPF_FS5_contig_1219	1180	10.5868	193	6.96682	114	5.96962	92
SPF_FS5_contig_1220	2809	14.3327	622	11.3214	441	13.9559	512
SPF_FS5_contig_1221	1696	3.77832	99	5.27239	124	6.36553	141
SPF_FS5_contig_1222	5009	24.6298	1906	26.245	1823	26.3223	1722
SPF_FS5_contig_1223	2673	123.837	5114	114.927	4260	112.86	3940
SPF_FS5_contig_1224	852	538.941	7094	472.457	5582	597.617	6650
SPF_FS5_contig_1225	1298	82.4304	1653	103.113	1856	87.3618	1481
SPF_FS5_contig_1226	5146	131.92	10488	205.001	14629	389.337	26167
SPF_FS5_contig_1228	1554	32.8636	789	41.2537	889	44.4423	902
SPF_FS5_contig_1229	472	668.257	4873	587.443	3845	631.19	3891
SPF_FS5_contig_1230	1446	41.6298	930	38.101	764	34.8416	658
SPF_FS5_contig_1231	3036	44.7933	2101	48.6214	2047	51.3725	2037
SPF_FS5_contig_1232	1773	41.8374	1146	48.0751	1182	38.0891	882
SPF_FS5_contig_1233	813	343.144	4310	39.9148	450	105.668	1122
SPF_FS5_contig_1234	768	11.4622	136	21.2207	226	21.8335	219
SPF_FS5_contig_1235	772	17.9426	214	7.19259	77	31.44	317
SPF_FS5_contig_1236	2159	29.5306	985	25.9525	777	27.662	780
SPF_FS5_contig_1237	8716	10.2112	1375	9.65529	1167	9.62796	1096
SPF_FS5_contig_1238	2860	85.3906	3773	137.468	5452	132.198	4938
SPF_FS5_contig_1239	5457	4.06845	343	3.72655	282	3.29727	235
SPF_FS5_contig_1240	2351	12.5821	457	11.3491	370	10.9753	337
SPF_FS5_contig_1241	3951	5.16051	315	4.03364	221	4.53471	234
SPF_FS5_contig_1242	1894	53.8599	1576	54.1797	1423	56.2326	1391
SPF_FS5_contig_1243	1128	2.81175	49	0.958945	15	2.10423	31
SPF_FS5_contig_1244	1783	58.7376	1618	59.3726	1468	63.0399	1468
SPF_FS5_contig_1245	2604	10.9619	441	11.8249	427	11.3792	387
SPF_FS5_contig_1246	760	8.43162	99	7.40104	78	3.62685	36
SPF_FS5_contig_1247	1028	21.5339	342	24.6923	352	28.8988	388
SPF_FS5_contig_1248	1359	36.5313	767	39.7973	750	44.3401	787
SPF_FS5_contig_1249	6284	232.418	22564	215.661	18793	244.48	20065
SPF_FS5_contig_1250	1572	424.353	10306	821.727	17913	806.485	16558
SPF_FS5_contig_1251	3846	14.7598	877	17.7375	946	16.6233	835
SPF_FS5_contig_1252	2710	9.19561	385	5.18892	195	5.19864	184
SPF_FS5_contig_1253	1172	18.9985	344	21.9661	357	22.4736	344
SPF_FS5_contig_1254	471	41.3652	301	85.2798	557	75.2664	463
SPF_FS5_contig_1255	2341	986.867	35692	1154.14	37467	1133.03	34642
SPF_FS5_contig_1256	944	436.98	6373	447.038	5852	434.988	5363
SPF_FS5_contig_1257	1837	10.0421	285	14.3676	366	13.3377	320
SPF_FS5_contig_1258	2736	89.7338	3793	89.3238	3389	82.6676	2954
SPF_FS5_contig_1259	3469	25.6746	1376	31.2024	1501	30.1942	1368
SPF_FS5_contig_1260	2611	1.80969	73	2.70664	98	0.821093	28
SPF_FS5_contig_1261	4632	10.3128	738	9.77694	628	9.33944	565
SPF_FS5_contig_1262	984	43.7437	665	31.5859	431	31.8251	409
SPF_FS5_contig_1263	324	53.9396	270	53.1942	239	52.6988	223
SPF_FS5_contig_1264	2865	67.0094	2966	96.5278	3835	84.1835	3150
SPF_FS5_contig_1265	2240	8.63997	299	9.85111	306	11.5192	337
SPF_FS5_contig_1266	3252	78.6205	3950	139.258	6280	126.411	5369
SPF_FS5_contig_1267	1987	8.92569	274	7.73025	213	4.81674	125
SPF_FS5_contig_1268	2912	16.9599	763	17.1119	691	16.9857	646
SPF_FS5_contig_1269	1353	3.25312	68	2.87811	54	2.82952	50
SPF_FS5_contig_1270	530	37.0046	303	15.9192	117	16.6136	115
SPF_FS5_contig_1271	654	2.67224	27	3.08739	28	3.27809	28
SPF_FS5_contig_1272	3031	197.749	9260	212.888	8948	206.435	8172
SPF_FS5_contig_1273	8871	90.1487	12355	68.6822	8449	71.2501	8255
SPF_FS5_contig_1274	1906	7.74286	228	11.3882	301	10.2036	254
SPF_FS5_contig_1275	1658	23.3456	598	22.0079	506	21.6124	468
SPF_FS5_contig_1276	3074	7.87512	374	6.42774	274	6.12735	246
SPF_FS5_contig_1277	1698	43.7997	1149	45.442	1070	49.4213	1096
SPF_FS5_contig_1278	2179	2.43582	82	2.9454	89	2.74081	78
SPF_FS5_contig_1279	1464	2.65277	60	2.41361	49	2.61499	50
SPF_FS5_contig_1280	457	99.57	703	98.938	627	129.343	772
SPF_FS5_contig_1281	2090	699.491	22586	365.463	10592	339.386	9264
SPF_FS5_contig_1282	1369	2.83685	60	3.84531	73	4.02689	72
SPF_FS5_contig_1283	3993	3.33931	206	2.81732	156	3.29815	172
SPF_FS5_contig_1284	1330	38.3012	787	100.741	1858	81.633	1418
SPF_FS5_contig_1285	732	1010.35	11426	1123.85	11408	1039.72	9940
SPF_FS5_contig_1286	2256	57.8703	2017	69.8751	2186	59.3937	1750
SPF_FS5_contig_1287	401	0.322831	2	0	0	0	0
SPF_FS5_contig_1288	3760	10.1739	591	13.1375	685	14.1527	695
SPF_FS5_contig_1289	5819	24.3271	2187	36.4467	2941	33.5794	2552
SPF_FS5_contig_1290	1065	64.6668	1064	79.9672	1181	77.2858	1075
SPF_FS5_contig_1291	1495	3.2472	75	0.0482359	1	0	0
SPF_FS5_contig_1292	622	3.85035	37	4.75341	41	2.33886	19
SPF_FS5_contig_1293	671	6.36665	66	5.05111	47	7.30295	64
SPF_FS5_contig_1294	1216	13.9995	263	14.2921	241	14.86	236
SPF_FS5_contig_1295	5075	20.5343	1610	22.0388	1551	21.4538	1422
SPF_FS5_contig_1296	678	0.668279	7	0.212722	2	0.225861	2
SPF_FS5_contig_1297	2454	129.561	4912	180.546	6144	174.787	5602
SPF_FS5_contig_1298	658	22.4284	228	5.91806	54	8.14542	70
SPF_FS5_contig_1299	819	74.2115	939	66.0373	750	62.3567	667
SPF_FS5_contig_1300	2491	15.149	583	13.4325	464	12.8175	417
SPF_FS5_contig_1303	499	42.5464	328	33.6719	233	30.0744	196
SPF_FS5_contig_1304	2435	10.7924	406	10.7503	363	10.7225	341
SPF_FS5_contig_1305	5075	42.8924	3363	23.7297	1670	22.8569	1515
SPF_FS5_contig_1306	5675	7.58482	665	6.6458	523	7.02931	521
SPF_FS5_contig_1307	439	1703.12	11551	1777.85	10823	1686.74	9671
SPF_FS5_contig_1308	715	96.865	1070	89.0566	883	82.6708	772
SPF_FS5_contig_1309	5901	5.93418	541	6.3424	519	6.16324	475
SPF_FS5_contig_1310	2271	80.9166	2839	86.8782	2736	86.4791	2565
SPF_FS5_contig_1311	5412	71.0066	5937	80.1341	6014	103.405	7309
SPF_FS5_contig_1312	2669	140.611	5798	139.605	5167	136.897	4772
SPF_FS5_contig_1313	3870	10.8883	651	11.5157	618	12.7018	642
SPF_FS5_contig_1314	4302	4.87488	324	3.83863	229	3.5062	197
SPF_FS5_contig_1315	4595	11.6355	826	11.6134	740	10.9143	655
SPF_FS5_contig_1316	1922	162.021	4811	104.905	2796	145.485	3652
SPF_FS5_contig_1317	1046	0.680691	11	1.03412	15	0.512398	7
SPF_FS5_contig_1318	4075	5.32116	335	5.71593	323	5.39257	287
SPF_FS5_contig_1319	1740	41.4033	1113	54.0845	1305	62.9257	1430
SPF_FS5_contig_1320	5037	1.97896	154	6.9865	488	5.54833	365
SPF_FS5_contig_1321	419	0.308962	2	0.688427	4	0.365474	2
SPF_FS5_contig_1322	3336	51.8635	2673	69.8213	3230	66.8813	2914
SPF_FS5_contig_1323	3819	16.3217	963	12.5758	666	14.0944	703
SPF_FS5_contig_1324	561	1223.82	10607	1240.06	9647	1232.85	9033
SPF_FS5_contig_1325	1866	184.193	5310	167.529	4335	180.503	4399
SPF_FS5_contig_1326	1104	1490.73	25426	1407.63	21550	1710.62	24665
SPF_FS5_contig_1327	399	0.486673	3	0.361467	2	0	0
SPF_FS5_contig_1328	881	101.389	1380	141.77	1732	128.886	1483
SPF_FS5_contig_1329	1062	194.305	3188	227.61	3352	246.427	3418
SPF_FS5_contig_1330	4183	13.4933	872	19.153	1111	17.3891	950
SPF_FS5_contig_1331	2107	10.7521	350	10.7125	313	10.7928	297
SPF_FS5_contig_1332	1082	20.5788	344	27.3922	411	25.2628	357
SPF_FS5_contig_1333	387	7.86097	47	7.63984	41	8.90313	45
SPF_FS5_contig_1334	1846	37.0273	1056	46.5646	1192	43.5096	1049
SPF_FS5_contig_1336	480	485.861	3603	463.775	3087	549.846	3447
SPF_FS5_contig_1337	1471	16.0609	365	12.9911	265	13.7414	264
SPF_FS5_contig_1338	554	39.8413	341	32.8022	252	26.674	193
SPF_FS5_contig_1339	1269	69.4712	1362	97.1731	1710	94.4868	1566
SPF_FS5_contig_1340	457	12.039	85	13.2548	84	13.0683	78
SPF_FS5_contig_1341	3332	8.76114	451	7.31515	338	7.19251	313
SPF_FS5_contig_1342	1119	27.1289	469	29.5797	459	34.4175	503
SPF_FS5_contig_1343	1211	24.2662	454	30.31	509	23.3305	369
SPF_FS5_contig_1344	7316	25.5513	2888	31.1575	3161	30.1307	2879
SPF_FS5_contig_1345	852	1374.7	18095	1440.56	17020	1362.93	15166
SPF_FS5_contig_1346	1203	62.8444	1168	85.4802	1426	121.247	1905
SPF_FS5_contig_1347	1418	35.3308	774	62.3993	1227	79.9147	1480
SPF_FS5_contig_1348	6059	7.38187	691	7.20056	605	7.60741	602
SPF_FS5_contig_1349	1114	60.4279	1040	44.86	693	45.9127	668
SPF_FS5_contig_1350	911	1.20787	17	1.58315	20	1.59689	19
SPF_FS5_contig_1351	3182	37.2255	1830	45.5973	2012	40.5453	1685
SPF_FS5_contig_1352	1739	34.3179	922	39.6433	956	40.8592	928
SPF_FS5_contig_1353	1159	36.0218	645	41.9361	674	44.2621	670
SPF_FS5_contig_1354	3025	16.3049	762	16.3773	687	14.5034	573
SPF_FS5_contig_1355	4391	26.0915	1770	27.8039	1693	26.1907	1502
SPF_FS5_contig_1357	2259	4.4699	156	5.74603	180	5.62643	166
SPF_FS5_contig_1358	318	70.0198	344	52.6105	232	51.5262	214
SPF_FS5_contig_1359	436	20.3387	137	12.7355	77	24.5857	140
SPF_FS5_contig_1360	383	26.0262	154	29.3723	156	12.7945	64
SPF_FS5_contig_1361	1110	25.0746	430	30.6641	472	30.4198	441
SPF_FS5_contig_1362	3273	54.2857	2745	63.0793	2863	59.8406	2558
SPF_FS5_contig_1363	3721	34.3381	1974	29.0117	1497	27.7378	1348
SPF_FS5_contig_1364	1467	8.42738	191	10.0279	204	9.86445	189
SPF_FS5_contig_1365	5256	8.39882	682	9.89217	721	9.86221	677
SPF_FS5_contig_1366	3290	19.0051	966	23.9572	1093	24.5992	1057
SPF_FS5_contig_1367	2077	52.8229	1695	52.7044	1518	51.9048	1408
SPF_FS5_contig_1368	1282	27.6178	547	19.9688	355	23.2329	389
SPF_FS5_contig_1369	1493	1.43068	33	1.88372	39	0.512839	10
SPF_FS5_contig_1370	1438	7.42701	165	7.17115	143	7.02839	132
SPF_FS5_contig_1371	3518	12.4929	679	12.5039	610	13.0586	600
SPF_FS5_contig_1372	666	63.5613	654	59.6608	551	59.4371	517
SPF_FS5_contig_1373	738	29.294	334	27.0667	277	29.776	287
SPF_FS5_contig_1374	2412	179.799	6700	191.583	6408	195.449	6157
SPF_FS5_contig_1375	1139	19.2648	339	18.1073	286	13.2429	197
SPF_FS5_contig_1376	2183	83.5558	2818	111.555	3377	113.5	3236
SPF_FS5_contig_1377	1539	32.9316	783	20.945	447	21.194	426
SPF_FS5_contig_1378	1054	274.693	4473	246.031	3596	261.737	3603
SPF_FS5_contig_1379	2095	290.61	9406	369.96	10748	363.026	9933
SPF_FS5_contig_1380	2458	28.9668	1100	26.1108	890	26.353	846
SPF_FS5_contig_1381	767	33.2499	394	32.5306	346	43.8238	439
SPF_FS5_contig_1382	3120	56.0142	2700	105.488	4564	87.2666	3556
SPF_FS5_contig_1383	1597	71.6178	1767	104.218	2308	95.361	1989
SPF_FS5_contig_1384	1289	39.6199	789	52.1964	933	53.5196	901
SPF_FS5_contig_1386	816	22.6071	285	19.0887	216	25.71	274
SPF_FS5_contig_1387	862	6.53283	87	7.52917	90	6.57303	74
SPF_FS5_contig_1388	624	10.6842	103	12.0188	104	10.0617	82
SPF_FS5_contig_1389	456	4.82618	34	8.38152	53	6.7164	40
SPF_FS5_contig_1390	1175	261.444	4746	203.695	3319	202.462	3107
SPF_FS5_contig_1391	1060	10.1976	167	11.1571	164	9.89591	137
SPF_FS5_contig_1392	2945	32.7924	1492	27.5718	1126	27.2209	1047
SPF_FS5_contig_1393	1098	102.868	1745	190.659	2903	233.885	3354
SPF_FS5_contig_1394	1219	96.9055	1825	92.936	1571	110.485	1759
SPF_FS5_contig_1395	460	120.027	853	118.359	755	127.833	768
SPF_FS5_contig_1396	1910	74.0809	2186	100.467	2661	102.383	2554
SPF_FS5_contig_1397	3660	8.27664	468	8.96483	455	8.30521	397
SPF_FS5_contig_1398	2379	48.2396	1773	14.5802	481	29.7385	924
SPF_FS5_contig_1399	894	828.209	11439	893.988	11083	885.573	10340
SPF_FS5_contig_1400	399	12.3291	76	6.86787	38	5.37312	28
SPF_FS5_contig_1401	1513	42.6526	997	26.0235	546	28.0863	555
SPF_FS5_contig_1402	1379	158.275	3372	195.525	3739	189.502	3413
SPF_FS5_contig_1403	1713	2.11602	56	2.44164	58	1.56441	35
SPF_FS5_contig_1404	744	634.4	7292	601.714	6208	686.941	6675
SPF_FS5_contig_1405	835	69.6887	899	93.6169	1084	81.7019	891
SPF_FS5_contig_1406	3160	220.893	10784	219.601	9623	229.216	9460
SPF_FS5_contig_1407	1388	81.2825	1743	77.2562	1487	82.5246	1496
SPF_FS5_contig_1408	915	119.905	1695	119.084	1511	118.239	1413
SPF_FS5_contig_1409	1350	52.4533	1094	64.0467	1199	63.8625	1126
SPF_FS5_contig_1410	2100	24.1341	783	25.3425	738	28.4027	779
SPF_FS5_contig_1411	774	0.250882	3	0.559013	6	0.296771	3
SPF_FS5_contig_1412	397	943.685	5788	726.394	3999	897.781	4655
SPF_FS5_contig_1413	437	0.444354	3	0.495053	3	0	0
SPF_FS5_contig_1414	2218	58.7743	2014	62.5215	1923	59.203	1715
SPF_FS5_contig_1415	2590	93.2177	3730	101.737	3654	92.915	3143
SPF_FS5_contig_1416	444	0.437348	3	0.162416	1	0	0
SPF_FS5_contig_1417	693	388.459	4159	293.133	2817	321.404	2909
SPF_FS5_contig_1418	1309	70.1174	1418	42.4192	770	47.964	820
SPF_FS5_contig_1419	1334	46.532	959	43.8947	812	41.842	729
SPF_FS5_contig_1420	528	234.883	1916	341.852	2503	383.705	2646
SPF_FS5_contig_1421	1212	1.38855	26	2.85595	48	1.64252	26
SPF_FS5_contig_1422	2619	5.28893	214	5.42428	197	6.95797	238
SPF_FS5_contig_1423	770	1686.62	20064	945.706	10098	1219.1	12260
SPF_FS5_contig_1424	6024	24.1761	2250	31.9024	2665	30.4285	2394
SPF_FS5_contig_1425	563	24.4884	213	52.5155	410	37.1275	273
SPF_FS5_contig_1426	1338	177.203	3663	142.608	2646	132.476	2315
SPF_FS5_contig_1427	1403	77.7838	1686	217.674	4235	125.138	2293
SPF_FS5_contig_1428	1013	2.81146	44	5.83735	82	1.20935	16
SPF_FS5_contig_1429	448	3.46755	24	6.43863	40	3.07635	18
SPF_FS5_contig_1430	643	75.9014	754	112.935	1007	72.7564	611
SPF_FS5_contig_1431	1353	42.9603	898	47.3822	889	42.7824	756
SPF_FS5_contig_1432	1912	32.4653	959	47.1448	1250	48.7754	1218
SPF_FS5_contig_1433	6192	38.0818	3643	35.1363	3017	34.4749	2788
SPF_FS5_contig_1434	1843	135.882	3869	143.169	3659	131.115	3156
SPF_FS5_contig_1435	2211	2.16637	74	2.12	65	1.80076	52
SPF_FS5_contig_1437	563	113.244	985	45.5988	356	32.9115	242
SPF_FS5_contig_1438	1775	196.225	5381	279.025	6868	254.202	5893
SPF_FS5_contig_1439	593	98.5649	903	149.576	1230	163.721	1268
SPF_FS5_contig_1440	2263	2.00218	70	1.3065	41	2.40223	71
SPF_FS5_contig_1441	6310	7.1703	699	7.0627	618	6.73449	555
SPF_FS5_contig_1442	891	2.97848	41	3.72299	46	2.49208	29
SPF_FS5_contig_1443	595	30.2425	278	26.6635	220	20.8468	162
SPF_FS5_contig_1444	1531	8.54015	202	8.05439	171	9.80216	196
SPF_FS5_contig_1445	1836	5.64075	160	14.0219	357	13.0948	314
SPF_FS5_contig_1446	1975	26.6448	813	30.8168	844	29.2699	755
SPF_FS5_contig_1447	17309	4.25559	1138	3.59543	863	3.9281	888
SPF_FS5_contig_1448	2330	19.446	700	22.1909	717	20.5383	625
SPF_FS5_contig_1449	4373	22.6909	1533	27.2422	1652	27.174	1552
SPF_FS5_contig_1450	1753	1342.77	36366	3030.05	73658	2550.47	58393
SPF_FS5_contig_1451	4883	33.1392	2500	74.6233	5053	67.2685	4290
SPF_FS5_contig_1452	1440	171.528	3816	194.804	3890	198.702	3737
SPF_FS5_contig_1453	3049	5.28605	249	3.12197	132	3.96772	158
SPF_FS5_contig_1454	5969	1.73503	160	2.4404	202	3.43775	268
SPF_FS5_contig_1455	2239	5.81074	201	7.34332	228	6.6684	195
SPF_FS5_contig_1456	3432	14.4845	768	12.5651	598	14.2782	640
SPF_FS5_contig_1457	2184	51.3316	1732	104.075	3152	101.458	2894
SPF_FS5_contig_1458	14505	15.5382	3482	17.0923	3438	17.2612	3270
SPF_FS5_contig_1459	2415	57.1961	2134	59.422	1990	61.8242	1950
SPF_FS5_contig_1460	1736	14.1685	380	20.3544	490	20.4649	464
SPF_FS5_contig_1461	728	137.546	1547	76.3721	771	91.1861	867
SPF_FS5_contig_1462	1166	163.595	2947	214.483	3468	200.02	3046
SPF_FS5_contig_1463	400	33.8202	209	38.5803	214	26.607	139
SPF_FS5_contig_1464	595	16.9706	156	24.7243	204	16.2142	126
SPF_FS5_contig_1465	1053	4.91757	80	7.25921	106	4.58093	63
SPF_FS5_contig_1466	3562	6.50547	358	6.29619	311	5.93275	276
SPF_FS5_contig_1467	1583	18.809	460	17.1285	376	22.2494	460
SPF_FS5_contig_1468	6287	55.0807	5350	48.6677	4243	61.0879	5016
SPF_FS5_contig_1469	5518	34.9092	2976	41.3361	3163	36.0217	2596
SPF_FS5_contig_1470	2011	81.5934	2535	86.026	2399	81.5927	2143
SPF_FS5_contig_1471	431	79.5954	530	80.8131	483	89.8906	506
SPF_FS5_contig_1472	636	2.95141	29	4.53539	40	5.05631	42
SPF_FS5_contig_1473	592	13.8858	127	13.6429	112	10.9936	85
SPF_FS5_contig_1474	1432	17.9899	398	20.4957	407	19.4625	364
SPF_FS5_contig_1475	1368	14.242	301	13.9692	265	15.7276	281
SPF_FS5_contig_1476	3098	32.134	1538	37.9418	1630	34.8728	1411
SPF_FS5_contig_1477	827	596.715	7624	587.191	6734	599.296	6473
SPF_FS5_contig_1478	901	4.81326	67	5.04229	63	4.6739	55
SPF_FS5_contig_1479	3675	10.7615	611	9.90936	505	11.1256	534
SPF_FS5_contig_1480	8145	6.60388	831	7.61411	860	6.99396	744
SPF_FS5_contig_1481	1023	215.948	3413	188.705	2677	185.841	2483
SPF_FS5_contig_1482	3376	46.8009	2441	113.958	5335	107.389	4735
SPF_FS5_contig_1483	387	0.334509	2	0	0	0.395695	2
SPF_FS5_contig_1484	1188	13.2942	244	17.9675	296	19.464	302
SPF_FS5_contig_1485	1146	896.753	15877	1097.23	17437	977.932	14637
SPF_FS5_contig_1487	1440	1.03384	23	0.550861	11	0.691229	13
SPF_FS5_contig_1488	3553	13.2078	725	25.2486	1244	24.5238	1138
SPF_FS5_contig_1489	1423	113.398	2493	159.682	3151	151.896	2823
SPF_FS5_contig_1490	2174	5.29968	178	5.53947	167	3.87413	110
SPF_FS5_contig_1491	2354	129.125	4696	123.823	4042	121.453	3734
SPF_FS5_contig_1492	1482	8.03635	184	12.0188	247	8.42133	163
SPF_FS5_contig_1494	825	124.748	1590	51.9211	594	82.9707	894
SPF_FS5_contig_1495	5479	64.2905	5442	91.3682	6942	81.9192	5862
SPF_FS5_contig_1496	1063	27.8274	457	5.02007	74	5.97841	83
SPF_FS5_contig_1497	706	18.0614	197	21.1435	207	19.6298	181
SPF_FS5_contig_1498	3082	3.31829	158	2.94815	126	2.85697	115
SPF_FS5_contig_1499	1258	9.67312	188	9.57299	167	11.9293	196
SPF_FS5_contig_1500	5823	29.4681	2651	35.4805	2865	35.463	2697
SPF_FS5_contig_1501	2229	1.80041	62	0.679393	21	1.58012	46
SPF_FS5_contig_1502	2245	4.95908	172	4.43276	138	4.22909	124
SPF_FS5_contig_1503	497	1.30237	10	0.145096	1	0.616233	4
SPF_FS5_contig_1504	1685	10.026	261	7.61784	178	7.54309	166
SPF_FS5_contig_1505	1223	21.0642	398	14.8589	252	14.2741	228
SPF_FS5_contig_1506	2722	203.29	8549	228.525	8626	226.691	8059
SPF_FS5_contig_1507	3794	43.6408	2558	40.2759	2119	40.5236	2008
SPF_FS5_contig_1508	957	1059.65	15667	1110.4	14736	1117.38	13966
SPF_FS5_contig_1509	1249	43.2208	834	27.1938	471	30.0383	490
SPF_FS5_contig_1510	1835	15.5911	442	17.1341	436	16.1896	388
SPF_FS5_contig_1511	1913	2.36849	70	2.78951	74	2.96181	74
SPF_FS5_contig_1512	3104	85.0383	4078	82.0328	3531	84.6084	3430
SPF_FS5_contig_1513	3711	13.3955	768	23.1825	1193	25.0684	1215
SPF_FS5_contig_1514	864	185.942	2482	120.522	1444	72.6677	820
SPF_FS5_contig_1515	1901	72.9675	2143	74.5025	1964	67.7462	1682
SPF_FS5_contig_1516	1937	95.4372	2856	127.1	3414	115.621	2925
SPF_FS5_contig_1517	782	149.155	1802	271.667	2946	299.708	3061
SPF_FS5_contig_1518	4644	37.465	2688	45.4198	2925	42.702	2590
SPF_FS5_contig_1519	1806	74.8345	2088	93.1955	2334	91.4902	2158
SPF_FS5_contig_1520	1239	18.3369	351	17.2861	297	19.528	316
SPF_FS5_contig_1521	1527	273.068	6442	143.47	3038	131.172	2616
SPF_FS5_contig_1522	3345	31.4253	1624	37.8565	1756	37.5395	1640
SPF_FS5_contig_1523	1183	157.196	2873	280.648	4604	276.819	4277
SPF_FS5_contig_1525	1149	113.175	2009	113.033	1801	119.882	1799
SPF_FS5_contig_1526	366	0.707405	4	0	0	0	0
SPF_FS5_contig_1527	1311	14.9599	303	17.1618	312	14.4841	248
SPF_FS5_contig_1528	531	13.4087	110	14.5312	107	14.4194	100
SPF_FS5_contig_1530	1314	41.6246	845	54.2766	989	52.4431	900
SPF_FS5_contig_1531	1180	37.0264	675	48.5844	795	59.7611	921
SPF_FS5_contig_1532	882	8.95325	122	10.1383	124	16.5808	191
SPF_FS5_contig_1533	4013	15.0004	930	20.4855	1140	20.2817	1063
SPF_FS5_contig_1534	730	176.981	1996	155.981	1579	148.309	1414
SPF_FS5_contig_1535	1607	68.836	1709	68.9715	1537	66.6566	1399
SPF_FS5_contig_1536	1623	6.26138	157	9.90827	223	7.40666	157
SPF_FS5_contig_1538	5609	28.8152	2497	31.1901	2426	32.516	2382
SPF_FS5_contig_1539	2470	23.1657	884	20.9331	717	21.2651	686
SPF_FS5_contig_1540	1728	4.90701	131	3.25509	78	3.94355	89
SPF_FS5_contig_1541	3399	8.95027	470	9.97145	470	9.01052	400
SPF_FS5_contig_1542	1097	0.413029	7	0.328681	5	0.62817	9
SPF_FS5_contig_1543	1876	64.2445	1862	69.3066	1803	69.9142	1713
SPF_FS5_contig_1544	2223	15.8106	543	18.2309	562	16.946	492
SPF_FS5_contig_1547	883	1.686	23	0.653343	8	0.173424	2
SPF_FS5_contig_1548	1271	7.18063	141	6.46801	114	7.46994	124
SPF_FS5_contig_1549	2163	5.11716	171	8.66819	260	9.3806	265
SPF_FS5_contig_1551	1472	3.0341	69	6.46663	132	6.71001	129
SPF_FS5_contig_1552	1665	2.76015	71	3.1617	73	1.28761	28
SPF_FS5_contig_1553	3681	15.6676	891	63.8847	3261	67.7891	3259
SPF_FS5_contig_1554	837	28.3811	367	30.4131	353	33.6638	368
SPF_FS5_contig_1555	557	121.553	1046	45.9605	355	33.8159	246
SPF_FS5_contig_1556	699	58.8937	636	87.1748	845	145.028	1324
SPF_FS5_contig_1557	550	143.46	1219	213.454	1628	327.15	2350
SPF_FS5_contig_1558	330	69.8273	356	63.1532	289	50.8126	219
SPF_FS5_contig_1559	1161	163.296	2929	160.747	2588	170.412	2584
SPF_FS5_contig_1560	5208	41.8219	3365	58.0862	4195	54.6465	3717
SPF_FS5_contig_1561	4312	10.6879	712	12.2919	735	11.5774	652
SPF_FS5_contig_1562	5318	25.1096	2063	31.8798	2351	30.883	2145
SPF_FS5_contig_1563	1342	107.461	2228	75.0144	1396	82.4435	1445
SPF_FS5_contig_1564	1856	69.5054	1993	81.2822	2092	93.4809	2266
SPF_FS5_contig_1565	1028	14.7967	235	18.9401	270	15.2687	205
SPF_FS5_contig_1566	1589	61.6725	1514	80.2815	1769	80.7591	1676
SPF_FS5_contig_1567	1243	296.976	5703	951.795	16406	745.588	12104
SPF_FS5_contig_1569	1112	109.082	1874	162.967	2513	147.625	2144
SPF_FS5_contig_1570	411	1672.05	10617	1705.61	9721	1951.62	10476
SPF_FS5_contig_1571	1532	7.68957	182	9.64954	205	8.69624	174
SPF_FS5_contig_1572	2026	20.6387	646	34.4902	969	31.8588	843
SPF_FS5_contig_1574	1832	8.9389	253	11.4939	292	13.207	316
SPF_FS5_contig_1575	942	61.979	902	89.9495	1175	80.8748	995
SPF_FS5_contig_1576	1663	5.64371	145	3.03541	70	4.05165	88
SPF_FS5_contig_1577	1021	136.175	2148	132.218	1872	138.135	1842
SPF_FS5_contig_1578	7635	18.0661	2131	17.7661	1881	17.2088	1716
SPF_FS5_contig_1579	1061	4.69748	77	8.49584	125	2.09278	29
SPF_FS5_contig_1580	1096	8.03189	136	10.9222	166	15.8583	227
SPF_FS5_contig_1581	2807	112.322	4871	123.93	4824	107.908	3956
SPF_FS5_contig_1582	1289	11.3989	227	8.3917	150	9.97924	168
SPF_FS5_contig_1583	5044	30.1694	2351	40.8171	2855	38.6629	2547
SPF_FS5_contig_1584	1137	100.649	1768	143.781	2267	131.046	1946
SPF_FS5_contig_1585	1806	9.13927	255	12.6577	317	9.49667	224
SPF_FS5_contig_1586	1124	32.0758	557	54.5336	850	61.4443	902
SPF_FS5_contig_1587	1040	14.6882	236	15.8093	228	13.252	180
SPF_FS5_contig_1588	748	97.2644	1124	100.456	1042	95.5039	933
SPF_FS5_contig_1589	1610	7.07581	176	9.31642	208	9.22607	194
SPF_FS5_contig_1590	7779	9.20281	1106	9.9469	1073	9.78371	994
SPF_FS5_contig_1591	2181	39.5904	1334	60.3088	1824	59.9265	1707
SPF_FS5_contig_1592	10017	22.2156	3438	11.4105	1585	12.4516	1629
SPF_FS5_contig_1593	3644	2.89533	163	2.73094	138	2.29028	109
SPF_FS5_contig_1594	1904	1.32583	39	1.24985	33	1.00534	25
SPF_FS5_contig_1595	1758	392.084	10649	338.536	8253	301.041	6912
SPF_FS5_contig_1596	630	137.674	1340	52.8826	462	47.1555	388
SPF_FS5_contig_1597	750	829.548	9612	435.08	4525	431.225	4224
SPF_FS5_contig_1598	1252	62.9698	1218	67.8504	1178	66.2316	1083
SPF_FS5_contig_1599	1496	362.059	8368	486.038	10083	693.555	13551
SPF_FS5_contig_1600	3232	34.8672	1741	42.5492	1907	40.6288	1715
SPF_FS5_contig_1601	2051	136.367	4321	139.971	3981	148.131	3968
SPF_FS5_contig_1602	3347	37.6723	1948	23.1183	1073	18.1409	793
SPF_FS5_contig_1603	2710	4.92025	206	3.99148	150	4.71833	167
SPF_FS5_contig_1605	1676	4.63443	120	4.00148	93	5.43643	119
SPF_FS5_contig_1606	1867	84.0037	2423	110.158	2852	101.624	2478
SPF_FS5_contig_1607	335	1.1593	6	0.861047	4	0.228558	1
SPF_FS5_contig_1608	3899	22.511	1356	22.8785	1237	21.7192	1106
SPF_FS5_contig_1609	5079	7.1877	564	7.42566	523	7.00996	465
SPF_FS5_contig_1610	749	291.404	3372	337.457	3505	343.375	3359
SPF_FS5_contig_1611	739	34.2469	391	15.3203	157	26.7311	258
SPF_FS5_contig_1613	531	110.683	908	148.3	1092	157.748	1094
SPF_FS5_contig_1614	1291	62.4714	1246	89.6521	1605	78.9985	1332
SPF_FS5_contig_1615	1122	18.5183	321	16.0679	250	19.2441	282
SPF_FS5_contig_1616	3579	5.67881	314	7.01179	348	6.65334	311
SPF_FS5_contig_1617	1414	87.1121	1903	114.799	2251	102.017	1884
SPF_FS5_contig_1618	5151	19.025	1514	20.8036	1486	18.3576	1235
SPF_FS5_contig_1619	679	718.009	7532	1497.27	14098	1486.91	13186
SPF_FS5_contig_1620	2060	180.075	5731	292.756	8363	285.044	7669
SPF_FS5_contig_1621	2323	46.3653	1664	37.0652	1194	36.9156	1120
SPF_FS5_contig_1622	2527	102.278	3993	84.726	2969	96.201	3175
SPF_FS5_contig_1623	345	45.9659	245	35.9518	172	35.7312	161
SPF_FS5_contig_1624	1610	85.1911	2119	73.6356	1644	70.4796	1482
SPF_FS5_contig_1625	3518	15.3079	832	16.0706	784	15.148	696
SPF_FS5_contig_1626	17029	46.3534	12195	50.7275	11979	51.3294	11416
SPF_FS5_contig_1627	476	562.015	4133	349.656	2308	437.364	2719
SPF_FS5_contig_1628	1546	566.638	13534	826.544	17720	700.642	14147
SPF_FS5_contig_1629	2220	14.4617	496	19.7173	607	16.624	482
SPF_FS5_contig_1630	1521	6.97917	164	10.6201	224	10.672	212
SPF_FS5_contig_1631	3346	13.1931	682	10.582	491	12.8832	563
SPF_FS5_contig_1632	2641	18.4796	754	22.7724	834	19.6853	679
SPF_FS5_contig_1633	519	0.498864	4	0.277891	2	0.147528	1
SPF_FS5_contig_1634	2287	222.174	7850	261.617	8297	276.036	8245
SPF_FS5_contig_1635	727	43.5375	489	43.6445	440	46.551	442
SPF_FS5_contig_1636	310	171.215	820	190.517	819	222.044	899
SPF_FS5_contig_1637	3701	9.32175	533	10.2489	526	9.86826	477
SPF_FS5_contig_1638	1537	34.1536	811	35.8452	764	41.9449	842
SPF_FS5_contig_1639	2559	14.8982	589	17.8661	634	18.0721	604
SPF_FS5_contig_1640	4013	5.83887	362	6.27145	349	6.6779	350
SPF_FS5_contig_1641	8283	2.21151	283	2.73372	314	2.69921	292
SPF_FS5_contig_1642	1146	62.6942	1110	86.1451	1369	83.9163	1256
SPF_FS5_contig_1643	1267	150.401	2944	106.205	1866	101.586	1681
SPF_FS5_contig_1644	879	16.3476	222	13.7006	167	14.4597	166
SPF_FS5_contig_1645	3487	18.2098	981	22.1281	1070	20.2012	920
SPF_FS5_contig_1646	1525	129.073	3041	151.649	3207	144.649	2881
SPF_FS5_contig_1647	825	11.5333	147	15.2966	175	19.3969	209
SPF_FS5_contig_1648	3499	31.6146	1709	37.5093	1820	38.9728	1781
SPF_FS5_contig_1649	1579	13.4456	328	17.3545	380	15.3716	317
SPF_FS5_contig_1650	1397	16.7263	361	22.8675	443	21.8684	399
SPF_FS5_contig_1651	3692	253.598	14465	181.434	9289	195.005	9403
SPF_FS5_contig_1652	3248	26.7041	1340	36.8334	1659	32.3901	1374
SPF_FS5_contig_1653	8617	19.4776	2593	23.7335	2836	24.7818	2789
SPF_FS5_contig_1654	502	87.0341	675	120.667	840	101.123	663
SPF_FS5_contig_1655	1537	66.1173	1570	67.8901	1447	68.2477	1370
SPF_FS5_contig_1656	575	85.2152	757	40.3831	322	58.0577	436
SPF_FS5_contig_1657	862	219.713	2926	185.385	2216	163.97	1846
SPF_FS5_contig_1658	5158	4.94429	394	5.28472	378	5.03222	339
SPF_FS5_contig_1659	2465	82.5572	3144	105.404	3603	99.8631	3215
SPF_FS5_contig_1660	1201	84.6686	1571	103.035	1716	101.94	1599
SPF_FS5_contig_1661	893	57.5517	794	51.0361	632	58.99	688
SPF_FS5_contig_1662	996	9.22823	142	9.77431	135	10.6087	138
SPF_FS5_contig_1663	4678	20.9763	1516	35.0081	2271	30.8199	1883
SPF_FS5_contig_1664	4070	6.61589	416	6.18362	349	6.69725	356
SPF_FS5_contig_1665	355	8.2049	45	7.1097	35	7.54885	35
SPF_FS5_contig_1666	2327	3.81078	137	3.65677	118	4.86975	148
SPF_FS5_contig_1667	635	2.34446	23	1.93058	17	3.01445	25
SPF_FS5_contig_1668	2600	16.6798	670	17.3903	627	15.4901	526
SPF_FS5_contig_1669	1117	47.4592	819	57.9096	897	51.5473	752
SPF_FS5_contig_1670	849	6.09918	80	2.97284	35	3.33684	37
SPF_FS5_contig_1671	1142	148.103	2613	153.76	2435	159.034	2372
SPF_FS5_contig_1672	1182	113.191	2067	238.85	3915	238.964	3689
SPF_FS5_contig_1673	1799	101.283	2815	84.539	2109	84.6535	1989
SPF_FS5_contig_1674	2787	152.471	6565	213.233	8241	191.458	6969
SPF_FS5_contig_1675	1496	97.524	2254	104.361	2165	113.673	2221
SPF_FS5_contig_1676	1114	102.263	1760	170.183	2629	180.901	2632
SPF_FS5_contig_1677	1098	52.8785	897	50.8992	775	27.1959	390
SPF_FS5_contig_1678	5858	9.78979	886	13.6273	1107	10.7178	820
SPF_FS5_contig_1679	1328	96.214	1974	184.572	3399	166.625	2890
SPF_FS5_contig_1680	5054	4.30322	336	3.73833	262	4.06014	268
SPF_FS5_contig_1682	531	214.54	1760	272.697	2008	217.877	1511
SPF_FS5_contig_1683	1365	294.238	6205	227.696	4310	243.612	4343
SPF_FS5_contig_1684	629	1062.19	10322	1190.95	10388	1105.41	9081
SPF_FS5_contig_1685	662	435.298	4452	630.278	5786	688.061	5949
SPF_FS5_contig_1686	732	16.2703	184	11.3292	115	12.1336	116
SPF_FS5_contig_1687	872	11.5797	156	10.2546	124	8.42938	96
SPF_FS5_contig_1688	656	4.73616	48	3.07798	28	3.50154	30
SPF_FS5_contig_1689	951	4.83245	71	9.09939	120	5.31379	66
SPF_FS5_contig_1690	1712	7.14574	189	10.5305	250	7.82664	175
SPF_FS5_contig_1691	516	7.77734	62	14.9536	107	16.174	109
SPF_FS5_contig_1692	3873	16.9298	1013	23.5535	1265	23.8617	1207
SPF_FS5_contig_1693	373	10.5855	61	14.3065	74	12.7269	62
SPF_FS5_contig_1694	1749	38.8217	1049	6.92678	168	7.3984	169
SPF_FS5_contig_1697	453	118.882	832	141.997	892	134.203	794
SPF_FS5_contig_1698	1066	39.468	650	40.6564	601	39.3608	548
SPF_FS5_contig_1699	728	43.211	486	100.839	1018	93.3948	888
SPF_FS5_contig_1700	1308	33.304	673	30.5431	554	21.2491	363
SPF_FS5_contig_1701	738	11.4019	130	9.57594	98	2.90498	28
SPF_FS5_contig_1702	602	24.7298	230	24.5566	205	9.79344	77
SPF_FS5_contig_1703	589	20.77	189	33.6689	275	57.3277	441
SPF_FS5_contig_1704	571	334.634	2952	278.853	2208	307.072	2290
SPF_FS5_contig_1705	558	25.8678	223	23.1329	179	38.1462	278
SPF_FS5_contig_1706	1127	205.727	3582	266.695	4168	251.305	3699
SPF_FS5_contig_1707	530	23.8149	195	30.4778	224	27.0151	187
SPF_FS5_contig_1708	1510	32.4066	756	37.9666	795	39.4497	778
SPF_FS5_contig_1709	1022	76.2544	1204	37.9615	538	55.29	738
SPF_FS5_contig_1710	3856	21.4192	1276	19.8983	1064	19.8764	1001
SPF_FS5_contig_1711	1964	23.6961	719	17.5508	478	19.9604	512
SPF_FS5_contig_1712	436	15.4396	104	24.8094	150	24.9369	142
SPF_FS5_contig_1713	1782	56.5186	1556	46.1327	1140	45.9316	1069
SPF_FS5_contig_1714	528	165.251	1348	214.016	1567	192.722	1329
SPF_FS5_contig_1715	4135	11.7089	748	14.0737	807	15.2208	822
SPF_FS5_contig_1716	1956	19.8882	601	23.4845	637	22.743	581
SPF_FS5_contig_1717	6713	65.094	6751	63.0247	5867	58.2607	5108
SPF_FS5_contig_1718	1941	29.9461	898	21.7713	586	24.0628	610
SPF_FS5_contig_1719	426	2.27914	15	4.40124	26	2.51628	14
SPF_FS5_contig_1720	833	92.3125	1188	104.403	1206	105.797	1151
SPF_FS5_contig_1721	2243	1.18316	41	1.0288	32	0.989942	29
SPF_FS5_contig_1722	1916	57.667	1707	56.7567	1508	61.4613	1538
SPF_FS5_contig_1723	2686	14.3384	595	18.0416	672	18.1583	637
SPF_FS5_contig_1724	1661	102.177	2622	102.373	2358	103.948	2255
SPF_FS5_contig_1725	3509	14.7385	799	5.09659	248	5.97872	274
SPF_FS5_contig_1726	8229	19.9162	2532	23.2752	2656	21.8098	2344
SPF_FS5_contig_1727	3752	5.69299	330	6.30409	328	6.77511	332
SPF_FS5_contig_1728	1152	54.8386	976	57.8404	924	62.9417	947
SPF_FS5_contig_1729	924	5.32391	76	7.02396	90	7.04349	85
SPF_FS5_contig_1731	340	0.951876	5	0	0	0	0
SPF_FS5_contig_1732	1776	129.091	3542	145.24	3577	158.35	3673
SPF_FS5_contig_1733	3414	15.2624	805	14.4901	686	12.9406	577
SPF_FS5_contig_1734	1374	46.308	983	40.1501	765	47.1438	846
SPF_FS5_contig_1735	1849	66.7229	1906	86.855	2227	78.4718	1895
SPF_FS5_contig_1736	3502	18.1503	982	20.2418	983	18.0595	826
SPF_FS5_contig_1737	670	19.8047	205	19.9117	185	23.4272	205
SPF_FS5_contig_1738	1377	162.406	3455	222.361	4246	190.444	3425
SPF_FS5_contig_1739	7721	15.5762	1858	18.5115	1982	17.7013	1785
SPF_FS5_contig_1740	2215	48.1585	1648	59.9365	1841	59.8363	1731
SPF_FS5_contig_1741	1941	38.4497	1153	24.2233	652	24.7728	628
SPF_FS5_contig_1742	3445	37.4274	1992	38.1601	1823	38.0723	1713
SPF_FS5_contig_1743	4861	2.70308	203	5.57794	376	5.05616	321
SPF_FS5_contig_1744	2280	22.0869	778	25.9036	819	22.3656	666
SPF_FS5_contig_1745	2879	16.9744	755	21.1905	846	22.127	832
SPF_FS5_contig_1746	4673	14.1423	1021	24.9532	1617	20.432	1247
SPF_FS5_contig_1747	3031	8.90511	417	10.1829	428	10.1298	401
SPF_FS5_contig_1748	2092	14.4183	466	12.4784	362	12.8466	351
SPF_FS5_contig_1749	665	266.697	2740	285.74	2635	272.302	2365
SPF_FS5_contig_1750	710	2.18797	24	2.33604	23	3.01954	28
SPF_FS5_contig_1751	726	4.1012	46	1.29127	13	1.37103	13
SPF_FS5_contig_1752	1861	82.3616	2368	135.352	3493	108.206	2630
SPF_FS5_contig_1753	1726	106.654	2844	112.305	2688	125.098	2820
SPF_FS5_contig_1754	4915	104.525	7937	63.6323	4337	59.353	3810
SPF_FS5_contig_1755	1049	81.1408	1315	76.5811	1114	96.1283	1317
SPF_FS5_contig_1756	4005	20.0405	1240	23.0292	1279	20.8576	1091
SPF_FS5_contig_1757	3753	26.3705	1529	28.9181	1505	28.0317	1374
SPF_FS5_contig_1758	1798	19.4039	539	20.575	513	24.9119	585
SPF_FS5_contig_1759	1931	82.5268	2462	97.4324	2609	90.6828	2287
SPF_FS5_contig_1760	455	0.284517	2	0.950936	6	1.00967	6
SPF_FS5_contig_1761	2267	144.702	5068	153.673	4831	164.043	4857
SPF_FS5_contig_1762	797	19.8974	245	14.9292	165	10.7597	112
SPF_FS5_contig_1763	995	20.7519	319	14.9299	206	13.6974	178
SPF_FS5_contig_1764	5150	3.72026	296	3.80867	272	4.20746	283
SPF_FS5_contig_1765	2547	89.8359	3535	127.804	4514	119.495	3975
SPF_FS5_contig_1766	5975	18.1454	1675	19.9381	1652	19.4012	1514
SPF_FS5_contig_1767	1289	38.0632	758	40.5599	725	40.3922	680
SPF_FS5_contig_1768	1768	34.7069	948	32.7933	804	35.252	814
SPF_FS5_contig_1769	3782	185.848	10859	203.258	10660	181.335	8957
SPF_FS5_contig_1770	309	1.04737	5	0.233374	1	0.495579	2
SPF_FS5_contig_1771	2939	3.14938	143	2.25736	92	2.13627	82
SPF_FS5_contig_1772	595	79.3049	729	70.9007	585	57.1356	444
SPF_FS5_contig_1773	1230	65.1486	1238	59.5662	1016	64.8017	1041
SPF_FS5_contig_1774	1235	35.5871	679	67.7334	1160	58.1537	938
SPF_FS5_contig_1776	815	480.969	6056	680.691	7693	631.231	6719
SPF_FS5_contig_1777	4751	24.9183	1829	28.4292	1873	29.9434	1858
SPF_FS5_contig_1779	625	9.5279	92	11.9996	104	16.1709	132
SPF_FS5_contig_1780	2215	3.82813	131	3.35332	103	3.31848	96
SPF_FS5_contig_1781	1797	74.561	2070	91.8163	2288	87.0911	2044
SPF_FS5_contig_1782	1655	48.1839	1232	38.5182	884	44.2746	957
SPF_FS5_contig_1783	2402	48.9364	1816	56.7114	1889	50.6196	1588
SPF_FS5_contig_1785	1049	22.7688	369	21.5169	313	24.8897	341
SPF_FS5_contig_1786	371	236.927	1358	469.413	2415	492.835	2388
SPF_FS5_contig_1788	1748	109.904	2968	105.735	2563	104.382	2383
SPF_FS5_contig_1789	5725	121.88	10780	119.89	9518	115.793	8658
SPF_FS5_contig_1790	2267	16.3032	571	16.5093	519	15.6038	462
SPF_FS5_contig_1791	780	32.1148	387	39.5695	428	37.4	381
SPF_FS5_contig_1792	3310	37.0179	1893	39.0411	1792	48.7854	2109
SPF_FS5_contig_1793	1958	158.183	4785	198.144	5380	178.356	4561
SPF_FS5_contig_1794	2874	25.0442	1112	31.7406	1265	30.3976	1141
SPF_FS5_contig_1795	5777	12.3696	1104	18.387	1473	16.2226	1224
SPF_FS5_contig_1796	1194	62.2339	1148	57.7989	957	49.3132	769
SPF_FS5_contig_1797	9601	3.96415	588	3.64281	485	3.77212	473
SPF_FS5_contig_1798	2672	12.4029	512	12.6845	470	11.6054	405
SPF_FS5_contig_1799	2759	228.154	9725	199.035	7615	191.875	6914
SPF_FS5_contig_1800	641	189.841	1880	183.713	1633	178.815	1497
SPF_FS5_contig_1801	4829	11.0314	823	13.5893	910	13.3663	843
SPF_FS5_contig_1802	3009	78.882	3667	82.6096	3447	83.6409	3287
SPF_FS5_contig_1803	920	314.773	4474	377.965	4822	389.576	4681
SPF_FS5_contig_1804	2219	13.068	448	13.9416	429	13.4225	389
SPF_FS5_contig_1805	3178	219.255	10765	149.535	6590	141.063	5855
SPF_FS5_contig_1806	1060	474.954	7778	480.298	7060	485.478	6721
SPF_FS5_contig_1807	1329	165.691	3402	196.424	3620	209.075	3629
SPF_FS5_contig_1808	2854	8.59557	379	6.56948	260	6.54601	244
SPF_FS5_contig_1809	935	38.075	550	59.0784	766	55.2756	675
SPF_FS5_contig_1810	3623	14.6856	822	14.6494	736	14.0116	663
SPF_FS5_contig_1811	2128	30.4171	1000	25.8901	764	23.3515	649
SPF_FS5_contig_1812	735	36.4588	414	40.0299	408	35.3145	339
SPF_FS5_contig_1813	2926	50.5919	2287	52.3224	2123	52.8066	2018
SPF_FS5_contig_1814	8490	16.9633	2225	8.12011	956	7.53043	835
SPF_FS5_contig_1815	797	210.019	2586	139.43	1541	171.195	1782
SPF_FS5_contig_1816	428	377.023	2493	9.4353	56	11.6282	65
SPF_FS5_contig_1817	492	97.2229	739	3.07798	21	7.00307	45
SPF_FS5_contig_1818	630	279.972	2725	3.66287	32	9.47971	78
SPF_FS5_contig_1819	420	73.8202	479	70.9108	413	90.4219	496
SPF_FS5_contig_1821	1684	41.6655	1084	28.9907	677	31.6907	697
SPF_FS5_contig_1822	2751	16.8466	716	17.6415	673	18.425	662
SPF_FS5_contig_1823	825	1.88298	24	1.04891	12	1.20651	13
SPF_FS5_contig_1824	450	74.2209	516	106.567	665	104.982	617
SPF_FS5_contig_1825	729	1580.99	17806	264.017	2669	492.381	4688
SPF_FS5_contig_1826	785	145.781	1768	91.7714	999	67.5935	693
SPF_FS5_contig_1827	3559	47.559	2615	47.089	2324	50.2988	2338
SPF_FS5_contig_1828	2392	4.00488	148	3.43681	114	3.45703	108
SPF_FS5_contig_1829	3232	36.97	1846	25.8597	1159	27.765	1172
SPF_FS5_contig_1830	2443	39.3717	1486	34.8904	1182	42.0287	1341
SPF_FS5_contig_1831	1844	9.19665	262	7.11741	182	7.76465	187
SPF_FS5_contig_1832	742	7.15318	82	7.48339	77	7.53286	73
SPF_FS5_contig_1833	564	11.247	98	7.5437	59	8.95996	66
SPF_FS5_contig_1834	2499	13.9349	538	13.5626	470	12.6233	412
SPF_FS5_contig_1835	1597	28.7768	710	25.7384	570	30.2049	630
SPF_FS5_contig_1836	1343	253.464	5259	216.875	4039	372.629	6536
SPF_FS5_contig_1837	1301	33.533	674	17.7926	321	18.3031	311
SPF_FS5_contig_1838	1911	187.476	5535	239.394	6344	227.497	5678
SPF_FS5_contig_1839	685	0.850435	9	0.842192	8	0.894212	8
SPF_FS5_contig_1840	498	11.6978	90	7.24023	50	5.68871	37
SPF_FS5_contig_1841	1420	9.34447	205	13.1529	259	12.4017	230
SPF_FS5_contig_1842	5131	18.8342	1493	15.783	1123	12.5498	841
SPF_FS5_contig_1843	1283	67.1996	1332	78.1268	1390	73.2249	1227
SPF_FS5_contig_1844	1929	80.3977	2396	52.1873	1396	61.1662	1541
SPF_FS5_contig_1845	3772	12.4753	727	14.6061	764	14.0264	691
SPF_FS5_contig_1846	2148	607.348	20155	457.486	13627	452.023	12681
SPF_FS5_contig_1847	1655	86.9031	2222	86.5352	1986	85.2645	1843
SPF_FS5_contig_1848	1200	39.8074	738	33.3521	555	38.3473	601
SPF_FS5_contig_1849	1037	22.4705	360	29.9716	431	26.6544	361
SPF_FS5_contig_1850	920	12.3123	175	11.8359	151	12.8999	155
SPF_FS5_contig_1851	2571	29.8336	1185	29.1424	1039	31.5976	1061
SPF_FS5_contig_1852	1932	5.42747	162	3.17266	85	2.85343	72
SPF_FS5_contig_1853	3189	36.0477	1776	39.55	1749	40.3603	1681
SPF_FS5_contig_1854	399	31.4715	194	42.2916	234	37.9956	198
SPF_FS5_contig_1855	444	331.219	2272	392.559	2417	397.665	2306
SPF_FS5_contig_1856	500	1.55346	12	1.29803	9	0.765669	5
SPF_FS5_contig_1857	4537	15.4935	1086	18.8666	1187	18.3612	1088
SPF_FS5_contig_1858	4144	12.6831	812	15.1395	870	18.495	1001
SPF_FS5_contig_1859	3676	68.5837	3895	37.5865	1916	39.0333	1874
SPF_FS5_contig_1860	1902	30.9345	909	10.0093	264	11.9158	296
SPF_FS5_contig_1861	1114	292.552	5035	963.811	14889	761.958	11086
SPF_FS5_contig_1862	4710	14.5397	1058	18.0971	1182	18.6134	1145
SPF_FS5_contig_1863	1030	67.4298	1073	110.549	1579	107.268	1443
SPF_FS5_contig_1864	490	4.4913	34	3.23771	22	2.81266	18
SPF_FS5_contig_1865	1977	11.2299	343	11.7817	323	11.3863	294
SPF_FS5_contig_1866	2572	12.1805	484	10.8225	386	11.6101	390
SPF_FS5_contig_1867	2117	467.952	15305	448.924	13179	494.918	13684
SPF_FS5_contig_1868	3973	7.75493	476	9.00274	496	8.01707	416
SPF_FS5_contig_1869	2369	19.0713	698	9.64952	317	15.74	487
SPF_FS5_contig_1870	373	46.3331	267	56.4528	292	51.9341	253
SPF_FS5_contig_1871	2147	6.69284	222	7.28852	217	6.81149	191
SPF_FS5_contig_1872	458	962.999	6814	984.07	6250	961.099	5749
SPF_FS5_contig_1873	416	0.933571	6	0	0	0.184055	1
SPF_FS5_contig_1874	1784	3.33797	92	3.67839	91	3.34766	78
SPF_FS5_contig_1875	354	7.49669	41	8.96316	44	11.4634	53
SPF_FS5_contig_1876	591	16.4283	150	15.3743	126	15.1579	117
SPF_FS5_contig_1877	1797	73.8406	2050	83.7502	2087	85.9407	2017
SPF_FS5_contig_1878	3954	70.6208	4314	75.8515	4159	76.6056	3956
SPF_FS5_contig_1879	4805	30.781	2285	32.3569	2156	32.4911	2039
SPF_FS5_contig_1880	733	91.1308	1032	104.775	1065	107.277	1027
SPF_FS5_contig_1881	2866	2.37139	105	2.44066	97	1.95024	73
SPF_FS5_contig_1882	2463	76.7112	2919	126.834	4332	121.456	3907
SPF_FS5_contig_1883	973	10.7103	161	15.1933	205	5.03626	64
SPF_FS5_contig_1884	644	4.6234	46	7.83833	70	7.13356	60
SPF_FS5_contig_1885	673	14.8114	154	18.9657	177	15.7002	138
SPF_FS5_contig_1886	1474	28.8508	657	35.8117	732	36.6212	705
SPF_FS5_contig_1887	910	141.832	1994	46.9129	592	61.1694	727
SPF_FS5_contig_1888	2066	34.2122	1092	39.1628	1122	38.8764	1049
SPF_FS5_contig_1889	856	11.6449	154	14.4057	171	13.0593	146
SPF_FS5_contig_1890	1761	37.1605	1011	46.8466	1144	44.5227	1024
SPF_FS5_contig_1891	1442	4.93761	110	4.35077	87	3.45135	65
SPF_FS5_contig_1892	1754	0.959474	26	1.19228	29	1.09132	25
SPF_FS5_contig_1893	1128	90.148	1571	36.1842	566	43.3743	639
SPF_FS5_contig_1894	5523	6.34032	541	5.7711	442	5.28191	381
SPF_FS5_contig_1895	1825	59.0173	1664	62.1157	1572	61.9668	1477
SPF_FS5_contig_1896	2038	133.806	4213	218.956	6188	194.911	5188
SPF_FS5_contig_1897	1893	57.3077	1676	38.7801	1018	24.7538	612
SPF_FS5_contig_1898	1314	740.968	15042	452.323	8242	598.55	10272
SPF_FS5_contig_1899	2785	14.2703	614	15.3806	594	16.0557	584
SPF_FS5_contig_1900	2839	19.1971	842	25.2991	996	23.3288	865
SPF_FS5_contig_1901	1196	20.5656	380	23.9371	397	20.7422	324
SPF_FS5_contig_1902	4502	4.90273	341	6.31106	394	6.36073	374
SPF_FS5_contig_1903	1710	18.3584	485	24.7123	586	23.9999	536
SPF_FS5_contig_1904	1970	1477.04	44954	1510.45	41263	1443.97	37152
SPF_FS5_contig_1905	1122	205.836	3568	290.893	4526	302.924	4439
SPF_FS5_contig_1906	1665	109.784	2824	117.069	2703	88.4773	1924
SPF_FS5_contig_1907	3108	6.49775	312	5.73096	247	5.17344	210
SPF_FS5_contig_1908	2594	2.99434	120	3.58617	129	4.42754	150
SPF_FS5_contig_1909	2860	32.0017	1414	30.7614	1220	36.9449	1380
SPF_FS5_contig_1910	2341	93.2342	3372	116.502	3782	115.096	3519
SPF_FS5_contig_1911	1295	31.2892	626	28.9564	520	28.6165	484
SPF_FS5_contig_1913	626	52.4231	507	37.0931	322	29.7217	243
SPF_FS5_contig_1914	395	568.619	3470	14.4225	79	20.1594	104
SPF_FS5_contig_1916	373	10.4119	60	9.66658	50	11.9058	58
SPF_FS5_contig_1917	1054	751.061	12230	851.258	12442	832.938	11466
SPF_FS5_contig_1918	3225	10.0554	501	10.4647	468	10.4226	439
SPF_FS5_contig_1919	869	2.83043	38	2.40652	29	1.67408	19
SPF_FS5_contig_1920	1564	301.703	7290	328.611	7127	295.399	6034
SPF_FS5_contig_1921	1445	23.1138	516	20.461	410	18.0687	341
SPF_FS5_contig_1922	1891	10.6453	311	9.68621	254	10.2035	252
SPF_FS5_contig_1923	4664	12.754	919	11.2869	730	11.9349	727
SPF_FS5_contig_1924	1297	122.718	2459	160.405	2885	179.345	3038
SPF_FS5_contig_1925	2071	21.4092	685	13.754	395	17.1176	463
SPF_FS5_contig_1926	694	2.70475	29	3.32508	32	1.6549	15
SPF_FS5_contig_1927	1245	32.9097	633	51.3187	886	47.9696	780
SPF_FS5_contig_1928	570	1.13557	10	1.01211	8	1.07462	8
SPF_FS5_contig_1929	3048	14.483	682	14.1244	597	13.0124	518
SPF_FS5_contig_1930	2493	50.0061	1926	74.1086	2562	78.1333	2544
SPF_FS5_contig_1931	1946	51.2898	1542	23.4199	632	22.3878	569
SPF_FS5_contig_1932	514	0.377787	3	0.280594	2	0.446889	3
SPF_FS5_contig_1933	326	1872.33	9430	2660.87	12029	2458.36	10467
SPF_FS5_contig_1934	1299	12.208	245	16.5987	299	15.4431	262
SPF_FS5_contig_1936	455	2.13388	15	1.26792	8	1.17795	7
SPF_FS5_contig_1937	1548	14.9275	357	20.1245	432	22.7524	460
SPF_FS5_contig_1938	2943	2.66124	121	2.3768	97	2.28946	88
SPF_FS5_contig_1939	3749	21.4435	1242	19.5814	1018	23.0783	1130
SPF_FS5_contig_1940	470	2.61665	19	1.99461	13	1.79199	11
SPF_FS5_contig_1941	2955	15.8807	725	18.986	778	19.1741	740
SPF_FS5_contig_1942	1359	75.968	1595	152.132	2867	132.513	2352
SPF_FS5_contig_1943	410	9.15658	58	10.5531	60	21.1026	113
SPF_FS5_contig_1944	2554	96.8886	3823	102.296	3623	109.334	3647
SPF_FS5_contig_1945	2074	116.972	3748	127.988	3681	132.239	3582
SPF_FS5_contig_1946	2478	3.21287	123	2.67731	92	2.78088	90
SPF_FS5_contig_1947	7173	31.3125	3470	22.238	2212	22.2773	2087
SPF_FS5_contig_1948	1533	1.8578	44	2.49313	53	2.74702	55
SPF_FS5_contig_1949	925	12.1758	174	9.35516	120	9.85023	119
SPF_FS5_contig_1950	1219	23.3635	440	18.1021	306	18.4665	294
SPF_FS5_contig_1951	1006	10.359	161	9.03201	126	12.7104	167
SPF_FS5_contig_1952	3104	1.418	68	1.18484	51	1.45536	59
SPF_FS5_contig_1953	1504	119.686	2781	127.54	2660	125.847	2472
SPF_FS5_contig_1954	383	9.80208	58	8.47277	45	7.3968	37
SPF_FS5_contig_1955	1666	5.16733	133	4.50163	104	6.57207	143
SPF_FS5_contig_1956	660	88.461	902	153.84	1408	170.767	1472
SPF_FS5_contig_1957	426	2.27914	15	3.04701	18	2.33655	13
SPF_FS5_contig_1958	604	531.752	4962	769.958	6449	926.155	7306
SPF_FS5_contig_1959	6891	9.27095	987	11.2078	1071	10.8556	977
SPF_FS5_contig_1960	4134	10.1616	649	11.3385	650	13.8909	750
SPF_FS5_contig_1961	1895	43.3453	1269	60.2017	1582	53.2938	1319
SPF_FS5_contig_1962	2794	21.962	948	25.7324	997	23.4853	857
SPF_FS5_contig_1963	5899	9.11826	831	10.0364	821	9.566	737
SPF_FS5_contig_1964	1575	21.4115	521	22.7556	497	22.3138	459
SPF_FS5_contig_1965	827	115.445	1475	101.673	1166	90.7322	980
SPF_FS5_contig_1966	1465	89.5582	2027	94.6571	1923	87.5946	1676
SPF_FS5_contig_1967	1882	153.393	4460	180.205	4703	169.204	4159
SPF_FS5_contig_1968	2424	15.4609	579	12.6435	425	12.4137	393
SPF_FS5_contig_1969	1798	32.8678	913	26.8317	669	29.4685	692
SPF_FS5_contig_1970	4184	14.4802	936	12.6335	733	12.4074	678
SPF_FS5_contig_1971	6199	4.30194	412	5.80484	499	5.22468	423
SPF_FS5_contig_1972	2479	11.4624	439	11.723	403	10.9955	356
SPF_FS5_contig_1973	452	181.151	1265	85.1951	534	109.26	645
SPF_FS5_contig_1974	1089	16.8803	284	25.2957	382	58.1459	827
SPF_FS5_contig_1975	3409	23.6012	1243	23.9247	1131	26.4357	1177
SPF_FS5_contig_1976	2024	14.0712	440	24.9758	701	24.3244	643
SPF_FS5_contig_1977	663	307.627	3151	398.088	3660	346.919	3004
SPF_FS5_contig_1978	1903	18.3673	540	22.8502	603	21.5256	535
SPF_FS5_contig_1979	1735	29.6963	796	24.1484	581	24.1395	547
SPF_FS5_contig_1980	390	0.331936	2	0.369809	2	0.392651	2
SPF_FS5_contig_1981	1987	4.36512	134	1.77832	49	2.11937	55
SPF_FS5_contig_1982	976	15.1871	229	17.0677	231	19.9262	254
SPF_FS5_contig_1983	1271	208.85	4101	198.352	3496	226.267	3756
SPF_FS5_contig_1984	2020	2.75573	86	3.10584	87	2.12265	56
SPF_FS5_contig_1985	417	0.77611	5	0.86466	5	0.734455	4
SPF_FS5_contig_1986	2285	12.6622	447	19.2195	609	18.1616	542
SPF_FS5_contig_1987	480	340.629	2526	74.9671	499	38.6025	242
SPF_FS5_contig_1988	2376	199.958	7340	256.917	8465	250.615	7777
SPF_FS5_contig_1989	889	69.897	960	68.6247	846	73.3802	852
SPF_FS5_contig_1990	2901	31.0139	1390	32.1164	1292	32.6749	1238
SPF_FS5_contig_1991	541	81.3581	680	161.154	1209	208.047	1470
SPF_FS5_contig_1992	307	184.484	875	429.622	1829	136.174	546
SPF_FS5_contig_1993	397	6.19559	38	15.0765	83	16.0077	83
SPF_FS5_contig_1995	536	6.76258	56	8.47593	63	6.71389	47
SPF_FS5_contig_1996	851	613.809	8070	1032.63	12186	986.103	10960
SPF_FS5_contig_1997	1488	20.4884	471	23.3591	482	21.4573	417
SPF_FS5_contig_1998	522	2.23198	18	1.24332	9	1.76016	12
SPF_FS5_contig_1999	556	15.367	132	7.00375	54	7.84949	57
SPF_FS5_contig_2000	792	10.1341	124	14.5682	160	6.09055	63
SPF_FS5_contig_2001	8019	6.635	822	6.54671	728	5.74801	602
SPF_FS5_contig_2002	1975	67.9394	2073	69.9219	1915	76.4894	1973
SPF_FS5_contig_2003	2024	5.78838	181	6.84073	192	6.69582	177
SPF_FS5_contig_2004	1692	65.3014	1707	3.49482	82	4.70624	104
SPF_FS5_contig_2005	3292	14.196	722	15.2462	696	15.5599	669
SPF_FS5_contig_2006	3330	36.6984	1888	49.3311	2278	47.0898	2048
SPF_FS5_contig_2007	1357	65.5384	1374	29.2808	551	41.1328	729
SPF_FS5_contig_2008	1330	99.0867	2036	113.049	2085	105.351	1830
SPF_FS5_contig_2009	5954	16.4374	1512	19.0879	1576	17.2835	1344
SPF_FS5_contig_2010	1124	22.1133	384	17.2583	269	18.5286	272
SPF_FS5_contig_2011	4577	30.5324	2159	35.7018	2266	32.5539	1946
SPF_FS5_contig_2012	2048	95.4479	3020	137.852	3915	126.403	3381
SPF_FS5_contig_2013	546	42.3219	357	48.7355	369	47.3986	338
SPF_FS5_contig_2014	1967	5.79159	176	2.12635	58	2.7248	70
SPF_FS5_contig_2015	2237	9.11452	315	13.4748	418	14.1702	414
SPF_FS5_contig_2016	1575	14.7949	360	12.9574	283	14.9245	307
SPF_FS5_contig_2017	1447	85.7964	1918	104.556	2098	95.1927	1799
SPF_FS5_contig_2018	1298	332.315	6664	447.732	8059	325.557	5519
SPF_FS5_contig_2019	1446	15.8014	353	17.704	355	17.6856	334
SPF_FS5_contig_2020	5576	8.1722	704	8.08293	625	8.71951	635
SPF_FS5_contig_2021	835	7.2867	94	6.39082	74	8.34442	91
SPF_FS5_contig_2022	6700	11.0037	1139	12.5605	1167	11.3936	997
SPF_FS5_contig_2023	2017	39.2473	1223	46.4424	1299	46.0464	1213
SPF_FS5_contig_2024	5227	61.0126	4927	86.0192	6235	74.1939	5065
SPF_FS5_contig_2025	664	30.4142	312	88.186	812	44.6256	387
SPF_FS5_contig_2026	2603	30.8842	1242	32.2194	1163	29.9149	1017
SPF_FS5_contig_2027	423	198.161	1295	214.804	1260	121.276	670
SPF_FS5_contig_2028	674	123.309	1284	82.0629	767	177.444	1562
SPF_FS5_contig_2029	450	164.552	1144	232.363	1450	115.701	680
SPF_FS5_contig_2030	533	1146.64	9442	1172.61	8667	1152.24	8021
SPF_FS5_contig_2031	1768	30.277	827	22.9635	563	27.8464	643
SPF_FS5_contig_2032	4367	16.6451	1123	19.9313	1207	19.4968	1112
SPF_FS5_contig_2033	440	320.254	2177	150.289	917	149.654	860
SPF_FS5_contig_2035	4181	35.1736	2272	55.1409	3197	50.4159	2753
SPF_FS5_contig_2036	823	657.107	8355	622.114	7100	615.326	6614
SPF_FS5_contig_2037	1390	96.9982	2083	103.137	1988	91.4947	1661
SPF_FS5_contig_2038	929	15.189	218	25.1502	324	23.6541	287
SPF_FS5_contig_2039	322	12.4631	62	4.703	21	13.7916	58
SPF_FS5_contig_2040	436	59.8285	403	16.2088	98	38.9859	222
SPF_FS5_contig_2041	3770	15.6239	910	19.2811	1008	18.8472	928
SPF_FS5_contig_2042	429	928.818	6156	114.977	684	193.291	1083
SPF_FS5_contig_2043	2089	23.3007	752	32.5871	944	30.898	843
SPF_FS5_contig_2044	10379	7.30282	1171	5.13453	739	5.32627	722
SPF_FS5_contig_2045	1415	33.8505	740	18.2448	358	22.9971	425
SPF_FS5_contig_2046	7756	41.5939	4984	63.438	6823	66.9121	6778
SPF_FS5_contig_2047	1875	9.14816	265	9.26888	241	10.0456	246
SPF_FS5_contig_2048	2323	58.4303	2097	71.3366	2298	63.0861	1914
SPF_FS5_contig_2049	1901	4.01781	118	4.85556	128	4.63187	115
SPF_FS5_contig_2050	483	2.68023	20	1.04511	7	3.17047	20
SPF_FS5_contig_2051	1918	14.7139	436	12.4825	332	10.499	263
SPF_FS5_contig_2052	2622	11.3804	461	14.6591	533	13.0532	447
SPF_FS5_contig_2053	8479	36.4212	4771	39.6922	4667	39.0014	4319
SPF_FS5_contig_2054	1155	11.4884	205	8.74093	140	8.61792	130
SPF_FS5_contig_2055	1141	13.6149	240	11.5658	183	8.99208	134
SPF_FS5_contig_2056	2576	23.318	928	22.0033	786	22.5302	758
SPF_FS5_contig_2057	774	47.2494	565	1.02486	11	1.97847	20
SPF_FS5_contig_2058	1997	20.7439	640	26.144	724	24.4615	638
SPF_FS5_contig_2059	1320	35.6982	728	24.7478	453	20.0118	345
SPF_FS5_contig_2060	464	22.7383	163	24.711	159	22.9371	139
SPF_FS5_contig_2061	566	889.832	7781	977.98	7676	956.681	7072
SPF_FS5_contig_2062	572	47.7536	422	33.0306	262	40.559	303
SPF_FS5_contig_2063	2646	108.956	4454	174.286	6395	173.737	6004
SPF_FS5_contig_2064	1774	93.8075	2571	111.421	2741	105.355	2441
SPF_FS5_contig_2065	1779	545.072	14981	606.736	14968	666.679	15490
SPF_FS5_contig_2066	961	97.2597	1444	200.43	2671	167.794	2106
SPF_FS5_contig_2067	1594	90.9597	2240	108.486	2398	106.636	2220
SPF_FS5_contig_2068	492	150.899	1147	355.287	2424	384.391	2470
SPF_FS5_contig_2069	1199	8.52957	158	9.44261	157	6.51362	102
SPF_FS5_contig_2070	882	80.9461	1103	81.9239	1002	186.295	2146
SPF_FS5_contig_2071	2121	53.8633	1765	37.1953	1094	39.4206	1092
SPF_FS5_contig_2072	1239	96.2294	1842	66.8745	1149	72.2411	1169
SPF_FS5_contig_2074	1810	10.4422	292	11.5938	291	9.51799	225
SPF_FS5_contig_2075	6055	30.5518	2858	38.9921	3274	38.9473	3080
SPF_FS5_contig_2076	1892	2.29215	67	2.47744	65	2.10438	52
SPF_FS5_contig_2077	1909	1.93267	57	4.19304	111	4.2916	107
SPF_FS5_contig_2078	409	2.21561	14	2.99735	17	2.43367	13
SPF_FS5_contig_2079	2012	43.3018	1346	74.9083	2090	70.2498	1846
SPF_FS5_contig_2080	2157	88.6741	2955	107.651	3220	102.977	2901
SPF_FS5_contig_2081	1955	10.0651	304	12.8364	348	12.2585	313
SPF_FS5_contig_2082	920	50.1639	713	64.0392	817	77.3992	930
SPF_FS5_contig_2083	1233	18.5311	353	16.8438	288	10.122	163
SPF_FS5_contig_2084	7380	20.8216	2374	25.2297	2582	22.7211	2190
SPF_FS5_contig_2085	1402	120.406	2608	62.3399	1212	95.299	1745
[truncated: 83,546 more rows]
