# Supplementary material for: First transcriptome analysis of bryozoan Fredericella sultana, the primary host of myxozoan parasite Tetracapsuloides bryosalmonae
Source: PeerJ. 2020 Apr 28;8:e9027. doi: 10.7717/peerj.9027 (PMC7194087; doi:10.7717/peerj.9027)
Supplement: Table S3 — List of annotated F. sultana contigs. This file contains all the information of annotated contigs for zooids through Blast2GO. [file peerj-08-9027-s005.xlsx]

## Sheet: Supplementary Table 3
SeqName	Tags	Description	Length	#Hits	e-Value	sim mean	#GO	GO IDs	GO Names	Enzyme Codes	Enzyme Names	InterPro IDs	InterPro GO IDs	InterPro GO Names
SPF_FS5_contig_1	[INTERPRO, BLASTED, MAPPED, GO-SLIM]	Endoglucanase E-4	1927	15	1.17395e-176	71.33	3	P:GO:0000272; F:GO:0004553; F:GO:0030247	P:polysaccharide catabolic process; F:hydrolase activity, hydrolyzing O-glycosyl compounds; F:polysaccharide binding			IPR001919 (SMART); IPR001919 (PFAM); IPR001701 (PFAM); IPR012291 (G3DSA:2.60.40.GENE3D); IPR012341 (G3DSA:1.50.10.GENE3D); mobidb-lite (MOBIDB_LITE); mobidb-lite (MOBIDB_LITE); PTHR22298:SF39 (PANTHER); PTHR22298 (PANTHER); PS51257 (PROSITE_PROFILES); IPR001919 (PROSITE_PROFILES); IPR008928 (SUPERFAMILY); IPR008965 (SUPERFAMILY)	F:GO:0003824; F:GO:0004553; P:GO:0005975; F:GO:0030246; F:GO:0030247	F:catalytic activity; F:hydrolase activity, hydrolyzing O-glycosyl compounds; P:carbohydrate metabolic process; F:carbohydrate binding; F:polysaccharide binding
SPF_FS5_contig_4	[BLASTED, MAPPED, ANNOTATED]	calsyntenin-1-like isoform X1	1179	15	1.29046e-54	51.73	1	C:GO:0016020	C:membrane
SPF_FS5_contig_6	[INTERPRO, BLASTED, MAPPED, GO-SLIM]	high affinity cGMP-specific 3',5'-cyclic phosphodiesterase 9A-like isoform X1	2677	15	0	70.8	2	F:GO:0004114; P:GO:0007165	F:3',5'-cyclic-nucleotide phosphodiesterase activity; P:signal transduction			IPR023088 (PRINTS); IPR003607 (SMART); IPR036971 (G3DSA:1.10.1300.GENE3D); IPR002073 (PFAM); PTHR11347 (PANTHER); PTHR11347:SF78 (PANTHER); PTHR11347:SF78 (PANTHER); PTHR11347 (PANTHER); IPR002073 (PROSITE_PROFILES); IPR003607 (CDD); SSF109604 (SUPERFAMILY)	F:GO:0004114; P:GO:0007165; F:GO:0008081	F:3',5'-cyclic-nucleotide phosphodiesterase activity; P:signal transduction; F:phosphoric diester hydrolase activity
SPF_FS5_contig_7	[INTERPRO, BLASTED, MAPPED, GO-SLIM]	40S ribosomal protein S13	546	15	1.13686e-97	97.44	14	P:GO:0000184; F:GO:0003735; F:GO:0005515; C:GO:0005654; C:GO:0005730; P:GO:0006412; P:GO:0006614; C:GO:0014069; P:GO:0019083; C:GO:0022627; P:GO:0033119; F:GO:0048027; F:GO:0070181; F:GO:1990932	P:nuclear-transcribed mRNA catabolic process, nonsense-mediated decay; F:structural constituent of ribosome; F:protein binding; C:nucleoplasm; C:nucleolus; P:translation; P:SRP-dependent cotranslational protein targeting to membrane; C:postsynaptic density; P:viral transcription; C:cytosolic small ribosomal subunit; P:negative regulation of RNA splicing; F:mRNA 5'-UTR binding; F:small ribosomal s…			IPR012606 (SMART); IPR000589 (SMART); IPR000589 (PFAM); G3DSA:1.10.287.10 (GENE3D); IPR012606 (PFAM); G3DSA:1.10.8.1030 (GENE3D); IPR023029 (PANTHER); PTHR11885:SF6 (PANTHER); IPR023029 (HAMAP); IPR000589 (CDD); IPR009068 (SUPERFAMILY)	F:GO:0003735; C:GO:0005622; C:GO:0005840; P:GO:0006412	F:structural constituent of ribosome; C:intracellular; C:ribosome; P:translation
SPF_FS5_contig_8	[INTERPRO, BLASTED, MAPPED, GO-SLIM]	cytochrome c oxidase subunit 2 (mitochondrion)	3629	15	1.03482e-114	79.74	5	C:GO:0005739; P:GO:0006091; F:GO:0016491; F:GO:0022857; F:GO:0043167	C:mitochondrion; P:generation of precursor metabolites and energy; F:oxidoreductase activity; F:transmembrane transporter activity; F:ion binding	EC:1.9.3.1	Cytochrome-c oxidase	no IPS match	no IPS match	no IPS match
SPF_FS5_contig_9	[BLASTED, MAPPED, ANNOTATED]	insoluble matrix shell protein 5	457	15	2.38216e-14	53.52	1	F:GO:0005509	F:calcium ion binding
SPF_FS5_contig_11	[INTERPRO, BLASTED, MAPPED, GO-SLIM]	zinc transporter 9-like	3106	15	9.54169e-158	69.54	4	P:GO:0006812; F:GO:0008324; C:GO:0016021; P:GO:0055085	P:cation transport; F:cation transmembrane transporter activity; C:integral component of membrane; P:transmembrane transport			IPR037129 (G3DSA:3.90.530.GENE3D); IPR002524 (TIGRFAM); IPR027469 (G3DSA:1.20.1510.GENE3D); IPR002524 (PFAM); mobidb-lite (MOBIDB_LITE); mobidb-lite (MOBIDB_LITE); IPR040177 (PANTHER); IPR009061 (SUPERFAMILY); IPR027469 (SUPERFAMILY)	P:GO:0006812; F:GO:0008324; C:GO:0016021; P:GO:0055085	P:cation transport; F:cation transmembrane transporter activity; C:integral component of membrane; P:transmembrane transport
SPF_FS5_contig_12	[INTERPRO, BLASTED, MAPPED, GO-SLIM]	E3 ubiquitin-protein ligase TRIP12 isoform X2	7639	15	0	63.89	2	F:GO:0004842; F:GO:0008270	F:ubiquitin-protein transferase activity; F:zinc ion binding			IPR018123 (SMART); IPR000569 (SMART); IPR004170 (PFAM); IPR037197 (G3DSA:3.30.720.GENE3D); G3DSA:3.30.2160.10 (GENE3D); IPR000569 (PFAM); G3DSA:3.30.2410.10 (GENE3D); G3DSA:3.90.1750.10 (GENE3D); IPR011989 (G3DSA:1.25.10.GENE3D); mobidb-lite (MOBIDB_LITE); mobidb-lite (MOBIDB_LITE); mobidb-lite (MOBIDB_LITE); mobidb-lite (MOBIDB_LITE); mobidb-lite (MOBIDB_LITE); mobidb-lite (MOBIDB_LITE); mobidb-…	F:GO:0004842; F:GO:0008270	F:ubiquitin-protein transferase activity; F:zinc ion binding
SPF_FS5_contig_14	[INTERPRO, BLASTED, MAPPED, GO-SLIM]	catenin beta-like	3054	15	0	80.35	2	P:GO:0007155; F:GO:0045296	P:cell adhesion; F:cadherin binding			IPR013284 (PRINTS); IPR000225 (SMART); IPR000225 (PFAM); IPR011989 (G3DSA:1.25.10.GENE3D); mobidb-lite (MOBIDB_LITE); mobidb-lite (MOBIDB_LITE); mobidb-lite (MOBIDB_LITE); mobidb-lite (MOBIDB_LITE); PTHR23315 (PANTHER); PTHR23315:SF68 (PANTHER); IPR000225 (PROSITE_PROFILES); IPR000225 (PROSITE_PROFILES); IPR000225 (PROSITE_PROFILES); IPR000225 (PROSITE_PROFILES); IPR000225 (PROSITE_PROFILES); IPR…	F:GO:0005515; P:GO:0007155; F:GO:0045296	F:protein binding; P:cell adhesion; F:cadherin binding
SPF_FS5_contig_18	[INTERPRO, BLASTED, MAPPED, GO-SLIM]	UNKNOWN	3655	15	1.85452e-53	70.4	2	P:GO:0006464; F:GO:0030234	P:cellular protein modification process; F:enzyme regulator activity			mobidb-lite (MOBIDB_LITE)	no GO terms	no GO terms
SPF_FS5_contig_20	[BLASTED, MAPPED, ANNOTATED]	insulin-like growth factor-binding protein-related protein 1	1548	15	1.56422e-52	55.75	3	P:GO:0001558; F:GO:0005520; C:GO:0005576	P:regulation of cell growth; F:insulin-like growth factor binding; C:extracellular region
SPF_FS5_contig_21	[INTERPRO, BLASTED, MAPPED, GO-SLIM]	malignant fibrous histiocytoma-amplified sequence 1 homolog	4519	15	3.35326e-75	46.57	3	F:GO:0005515; F:GO:0016787; P:GO:0042981	F:protein binding; F:hydrolase activity; P:regulation of apoptotic process			SM00364 (SMART); IPR003591 (SMART); PF08477 (PFAM); IPR001611 (PFAM); IPR032675 (G3DSA:3.80.10.GENE3D); G3DSA:1.10.533.10 (GENE3D); IPR032675 (G3DSA:3.80.10.GENE3D); G3DSA:3.40.50.300 (GENE3D); mobidb-lite (MOBIDB_LITE); mobidb-lite (MOBIDB_LITE); PTHR44393 (PANTHER); IPR001315 (PROSITE_PROFILES); IPR027417 (SUPERFAMILY); SSF52058 (SUPERFAMILY); SSF52058 (SUPERFAMILY)	F:GO:0005515; P:GO:0042981	F:protein binding; P:regulation of apoptotic process
SPF_FS5_contig_22	[INTERPRO, BLASTED, MAPPED, GO-SLIM]	Tubulin beta-4B chain	1574	15	0	99.88	6	F:GO:0003924; F:GO:0005198; C:GO:0005737; C:GO:0005856; P:GO:0007010; F:GO:0043167	F:GTPase activity; F:structural molecule activity; C:cytoplasm; C:cytoskeleton; P:cytoskeleton organization; F:ion binding	EC:3.6.1.15	Nucleoside-triphosphate phosphatase	IPR002453 (PRINTS); IPR000217 (PRINTS); IPR003008 (SMART); IPR018316 (SMART); IPR018316 (PFAM); IPR037103 (G3DSA:3.30.1330.GENE3D); IPR036525 (G3DSA:3.40.50.GENE3D); IPR003008 (PFAM); IPR023123 (G3DSA:1.10.287.GENE3D); mobidb-lite (MOBIDB_LITE); mobidb-lite (MOBIDB_LITE); IPR002453 (PTHR11588:PANTHER); IPR000217 (PANTHER); cd02187 (CDD); IPR036525 (SUPERFAMILY); IPR008280 (SUPERFAMILY)	F:GO:0003924; F:GO:0005200; F:GO:0005525; C:GO:0005874; P:GO:0007017	F:GTPase activity; F:structural constituent of cytoskeleton; F:GTP binding; C:microtubule; P:microtubule-based process
SPF_FS5_contig_23	[INTERPRO, BLASTED, MAPPED, GO-SLIM]	guanine nucleotide-binding protein subunit beta	1900	15	0	94.83	7	P:GO:0000132; F:GO:0005516; C:GO:0005737; P:GO:0007165; P:GO:0009792; P:GO:0040013; P:GO:0046662	P:establishment of mitotic spindle orientation; F:calmodulin binding; C:cytoplasm; P:signal transduction; P:embryo development ending in birth or egg hatching; P:negative regulation of locomotion; P:regulation of oviposition			IPR020472 (PRINTS); IPR001632 (PRINTS); IPR001680 (SMART); PIRSF002394 (PIRSF); IPR015943 (G3DSA:2.130.10.GENE3D); IPR001680 (PFAM); PTHR19850:SF47 (PANTHER); IPR016346 (PANTHER); IPR001680 (PROSITE_PROFILES); IPR017986 (PROSITE_PROFILES); IPR001680 (PROSITE_PROFILES); IPR001680 (PROSITE_PROFILES); IPR001680 (PROSITE_PROFILES); IPR001680 (PROSITE_PROFILES); IPR001680 (PROSITE_PROFILES); cd00200 (…	F:GO:0005515; P:GO:0007165	F:protein binding; P:signal transduction
SPF_FS5_contig_24	[INTERPRO, BLASTED, MAPPED, GO-SLIM]	cAMP-responsive element modulator-like isoform X1	1489	15	3.6745e-48	68.78	5	F:GO:0003677; F:GO:0003700; F:GO:0005515; C:GO:0005634; P:GO:0006355	F:DNA binding; F:DNA-binding transcription factor activity; F:protein binding; C:nucleus; P:regulation of transcription, DNA-templated			IPR001630 (PRINTS); IPR004827 (SMART); IPR003102 (PFAM); IPR004827 (PFAM); G3DSA:1.20.5.170 (GENE3D); mobidb-lite (MOBIDB_LITE); mobidb-lite (MOBIDB_LITE); mobidb-lite (MOBIDB_LITE); IPR029802 (PTHR22952:PANTHER); PTHR22952 (PANTHER); IPR004827 (PROSITE_PROFILES); IPR003102 (PROSITE_PROFILES); cd14690 (CDD); SSF57959 (SUPERFAMILY)	F:GO:0003677; F:GO:0003700; F:GO:0005515; C:GO:0005634; P:GO:0006355	F:DNA binding; F:DNA-binding transcription factor activity; F:protein binding; C:nucleus; P:regulation of transcription, DNA-templated
SPF_FS5_contig_25	[INTERPRO, BLASTED, MAPPED, GO-SLIM]	gonadotropin-releasing hormone II receptor-like	836	15	2.48348e-17	48.72	3	F:GO:0004930; P:GO:0007186; C:GO:0016021	F:G protein-coupled receptor activity; P:G protein-coupled receptor signaling pathway; C:integral component of membrane			IPR000276 (PRINTS); IPR000276 (PFAM); G3DSA:1.20.1070.10 (GENE3D); mobidb-lite (MOBIDB_LITE); PTHR24241 (PANTHER); IPR017452 (PROSITE_PROFILES); cd00637 (CDD); SSF81321 (SUPERFAMILY)	F:GO:0004930; P:GO:0007186; C:GO:0016021	F:G protein-coupled receptor activity; P:G protein-coupled receptor signaling pathway; C:integral component of membrane
SPF_FS5_contig_26	[INTERPRO, BLASTED, MAPPED, GO-SLIM]	E3 ubiquitin-protein ligase MIB1	4331	15	0	80.16	5	F:GO:0004842; F:GO:0005515; F:GO:0008270; P:GO:0016567; F:GO:0016874	F:ubiquitin-protein transferase activity; F:protein binding; F:zinc ion binding; P:protein ubiquitination; F:ligase activity			IPR002110 (PRINTS); IPR002110 (SMART); IPR000433 (SMART); IPR001841 (SMART); PF13637 (PFAM); IPR000433 (PFAM); IPR020683 (PFAM); PF13920 (PFAM); IPR036770 (G3DSA:1.25.40.GENE3D); IPR013083 (G3DSA:3.30.40.GENE3D); IPR037252 (G3DSA:2.30.30.GENE3D); IPR013083 (G3DSA:3.30.40.GENE3D); IPR013083 (G3DSA:3.30.40.GENE3D); G3DSA:3.30.60.90 (GENE3D); IPR040847 (PFAM); IPR010606 (PFAM); mobidb-lite (MOBIDB_L…	F:GO:0004842; F:GO:0005515; F:GO:0008270; P:GO:0016567; F:GO:0046872	F:ubiquitin-protein transferase activity; F:protein binding; F:zinc ion binding; P:protein ubiquitination; F:metal ion binding
SPF_FS5_contig_28	[INTERPRO, BLASTED, MAPPED, GO-SLIM]	cdc42 homolog	1708	15	2.9202e-112	97.43	13	F:GO:0003924; F:GO:0005525; C:GO:0005886; C:GO:0005938; P:GO:0006897; P:GO:0007015; P:GO:0007163; P:GO:0008360; F:GO:0019901; P:GO:0030031; P:GO:0032488; P:GO:0032956; C:GO:0042995	F:GTPase activity; F:GTP binding; C:plasma membrane; C:cell cortex; P:endocytosis; P:actin filament organization; P:establishment or maintenance of cell polarity; P:regulation of cell shape; F:protein kinase binding; P:cell projection assembly; P:Cdc42 protein signal transduction; P:regulation of actin cytoskeleton organization; C:cell projection	EC:3.6.1.15	Nucleoside-triphosphate phosphatase	PR00449 (PRINTS); SM00176 (SMART); SM00174 (SMART); SM00173 (SMART); SM00175 (SMART); IPR005225 (TIGRFAM); IPR001806 (PFAM); G3DSA:3.40.50.300 (GENE3D); PTHR24072 (PANTHER); PTHR24072:SF129 (PANTHER); IPR003578 (PROSITE_PROFILES); IPR037874 (CDD); IPR027417 (SUPERFAMILY)	F:GO:0003924; F:GO:0005525; C:GO:0005622; P:GO:0007264	F:GTPase activity; F:GTP binding; C:intracellular; P:small GTPase mediated signal transduction
SPF_FS5_contig_29	[INTERPRO, BLASTED, MAPPED, GO-SLIM]	40S ribosomal protein S3a	837	15	1.31453e-140	91.27	3	F:GO:0003735; P:GO:0006412; C:GO:0022627	F:structural constituent of ribosome; P:translation; C:cytosolic small ribosomal subunit			IPR001593 (SMART); IPR001593 (PFAM); mobidb-lite (MOBIDB_LITE); PTHR11830:SF0 (PANTHER); PTHR11830 (PANTHER); IPR027500 (HAMAP)	F:GO:0003735; C:GO:0005622; C:GO:0005840; P:GO:0006412	F:structural constituent of ribosome; C:intracellular; C:ribosome; P:translation
SPF_FS5_contig_30	[INTERPRO, BLASTED, MAPPED, GO-SLIM]	40S ribosomal protein S2	969	15	1.29211e-150	95.45	4	F:GO:0003723; F:GO:0003735; P:GO:0006412; C:GO:0022627	F:RNA binding; F:structural constituent of ribosome; P:translation; C:cytosolic small ribosomal subunit			IPR005324 (PFAM); IPR014721 (G3DSA:3.30.230.GENE3D); G3DSA:3.30.160.770 (GENE3D); IPR013810 (PFAM); IPR005711 (TIGRFAM); mobidb-lite (MOBIDB_LITE); PTHR13718:SF79 (PANTHER); IPR000851 (PANTHER); IPR013810 (PROSITE_PROFILES); IPR020568 (SUPERFAMILY); SSF54768 (SUPERFAMILY)	F:GO:0003723; F:GO:0003735; C:GO:0005840; P:GO:0006412; C:GO:0015935	F:RNA binding; F:structural constituent of ribosome; C:ribosome; P:translation; C:small ribosomal subunit
SPF_FS5_contig_31	[INTERPRO, BLASTED, MAPPED, GO-SLIM]	T-complex protein 1 subunit zeta	1784	15	0	88.09	5	C:GO:0005829; P:GO:0006457; C:GO:0032991; F:GO:0043167; F:GO:0051082	C:cytosol; P:protein folding; C:protein-containing complex; F:ion binding; F:unfolded protein binding			IPR017998 (PRINTS); IPR027409 (G3DSA:3.50.7.GENE3D); IPR027413 (G3DSA:1.10.560.GENE3D); IPR002423 (PFAM); IPR027410 (G3DSA:3.30.260.GENE3D); IPR012722 (TIGRFAM); PTHR11353:SF58 (PANTHER); PTHR11353 (PANTHER); IPR012722 (CDD); IPR027413 (SUPERFAMILY); IPR027409 (SUPERFAMILY); IPR027410 (SUPERFAMILY)	F:GO:0005524; P:GO:0006457; F:GO:0051082	F:ATP binding; P:protein folding; F:unfolded protein binding
SPF_FS5_contig_33	[INTERPRO, BLASTED, MAPPED, GO-SLIM]	arginine-glutamic acid dipeptide repeats protein-like isoform X1	3678	15	1.21179e-105	63.14	2	F:GO:0003677; F:GO:0003682	F:DNA binding; F:chromatin binding			IPR000949 (SMART); IPR001025 (SMART); G3DSA:1.10.10.60 (GENE3D); G3DSA:2.30.30.490 (GENE3D); G3DSA:1.10.1740.200 (GENE3D); IPR001025 (PFAM); IPR002951 (PFAM); IPR000949 (PFAM); mobidb-lite (MOBIDB_LITE); mobidb-lite (MOBIDB_LITE); mobidb-lite (MOBIDB_LITE); mobidb-lite (MOBIDB_LITE); mobidb-lite (MOBIDB_LITE); mobidb-lite (MOBIDB_LITE); mobidb-lite (MOBIDB_LITE); mobidb-lite (MOBIDB_LITE); mobidb…	F:GO:0003677; F:GO:0003682	F:DNA binding; F:chromatin binding
SPF_FS5_contig_35	[INTERPRO, BLASTED, MAPPED, GO-SLIM]	porphobilinogen deaminase	3644	15	3.15619e-103	72.19	3	F:GO:0004418; C:GO:0005737; P:GO:0006783	F:hydroxymethylbilane synthase activity; C:cytoplasm; P:heme biosynthetic process	EC:2.5.1.61	Hydroxymethylbilane synthase	IPR000860 (PRINTS); IPR000860 (TIGRFAM); IPR036803 (G3DSA:3.30.160.GENE3D); IPR022417 (PFAM); G3DSA:3.40.190.10 (GENE3D); G3DSA:3.40.190.10 (GENE3D); IPR022418 (PFAM); IPR000860 (PANTHER); IPR000860 (HAMAP); cd13645 (CDD); SSF53850 (SUPERFAMILY); IPR036803 (SUPERFAMILY)	F:GO:0004418; P:GO:0033014	F:hydroxymethylbilane synthase activity; P:tetrapyrrole biosynthetic process
SPF_FS5_contig_36	[INTERPRO, BLASTED, MAPPED, GO-SLIM]	soma ferritin-like	928	15	6.45397e-90	87.03	8	F:GO:0004322; C:GO:0005737; P:GO:0006826; P:GO:0006880; F:GO:0008198; F:GO:0008199; F:GO:0042802; P:GO:0055114	F:ferroxidase activity; C:cytoplasm; P:iron ion transport; P:intracellular sequestering of iron ion; F:ferrous iron binding; F:ferric iron binding; F:identical protein binding; P:oxidation-reduction process	EC:1.16.3.1; EC:1.16.3	Ferroxidase; Oxidizing metal ions	IPR012347 (G3DSA:1.20.1260.GENE3D); IPR008331 (PFAM); PTHR11431:SF55 (PANTHER); IPR001519 (PANTHER); IPR009040 (PROSITE_PROFILES); cd01056 (CDD); IPR009078 (SUPERFAMILY)	P:GO:0006826; P:GO:0006879; F:GO:0008199	P:iron ion transport; P:cellular iron ion homeostasis; F:ferric iron binding
SPF_FS5_contig_37	[INTERPRO, BLASTED, MAPPED, GO-SLIM]	cubilin-like	698	15	8.53753e-28	51.83	2	C:GO:0005623; F:GO:0022857	C:cell; F:transmembrane transporter activity			IPR000859 (SMART); IPR035914 (G3DSA:2.60.120.GENE3D); IPR000859 (PFAM); IPR035914 (G3DSA:2.60.120.GENE3D); PTHR43978 (PANTHER); IPR000859 (PROSITE_PROFILES); IPR000859 (CDD); IPR000859 (CDD); IPR035914 (SUPERFAMILY); IPR035914 (SUPERFAMILY)	no GO terms	no GO terms
SPF_FS5_contig_40	[INTERPRO, BLASTED, MAPPED, GO-SLIM]	heat shock cognate 71 kDa protein	2035	15	0	95.56	26	C:GO:0005615; C:GO:0005634; C:GO:0005764; C:GO:0005768; C:GO:0005829; C:GO:0005886; P:GO:0006397; P:GO:0006457; P:GO:0006605; P:GO:0006914; P:GO:0006950; P:GO:0007034; P:GO:0007049; F:GO:0008289; P:GO:0009058; P:GO:0016192; F:GO:0016887; F:GO:0019899; F:GO:0030674; P:GO:0030705; C:GO:0032991; F:GO:0043167; P:GO:0044281; P:GO:0044403; F:GO:0051082; P:GO:0055085	C:extracellular space; C:nucleus; C:lysosome; C:endosome; C:cytosol; C:plasma membrane; P:mRNA processing; P:protein folding; P:protein targeting; P:autophagy; P:response to stress; P:vacuolar transport; P:cell cycle; F:lipid binding; P:biosynthetic process; P:vesicle-mediated transport; F:ATPase activity; F:enzyme binding; F:protein binding, bridging; P:cytoskeleton-dependent intracellular trans…	EC:3.6.1.3; EC:3.6.1.15	Adenosinetriphosphatase; Nucleoside-triphosphate phosphatase	IPR013126 (PRINTS); G3DSA:3.30.420.40 (GENE3D); IPR029048 (G3DSA:1.20.1270.GENE3D); G3DSA:3.30.420.40 (GENE3D); IPR029047 (G3DSA:2.60.34.GENE3D); G3DSA:3.30.30.30 (GENE3D); G3DSA:3.90.640.10 (GENE3D); IPR013126 (PFAM); mobidb-lite (MOBIDB_LITE); PTHR19375:SF310 (PANTHER); IPR013126 (PANTHER); cd10233 (CDD); SSF53067 (SUPERFAMILY); IPR029048 (SUPERFAMILY); IPR029047 (SUPERFAMILY); SSF53067 (SUPERF…	no GO terms	no GO terms
SPF_FS5_contig_41	[INTERPRO, BLASTED, MAPPED, GO-SLIM]	myosin regulatory light chain	2125	15	4.36178e-65	77.73	1	F:GO:0043167	F:ion binding			IPR002048 (SMART); G3DSA:1.10.238.10 (GENE3D); G3DSA:1.10.238.10 (GENE3D); IPR002048 (PFAM); mobidb-lite (MOBIDB_LITE); mobidb-lite (MOBIDB_LITE); PTHR23049:SF59 (PANTHER); PTHR23049 (PANTHER); IPR002048 (PROSITE_PROFILES); IPR002048 (PROSITE_PROFILES); IPR002048 (CDD); IPR002048 (CDD); IPR011992 (SUPERFAMILY)	F:GO:0005509	F:calcium ion binding
SPF_FS5_contig_42	[BLASTED, MAPPED, ANNOTATED]	uncharacterized protein LOC106157198	967	7	1.4387e-19	51.7	1	C:GO:0016020	C:membrane
SPF_FS5_contig_44	[INTERPRO, BLASTED, MAPPED, GO-SLIM]	40S ribosomal protein S5	762	15	2.97555e-129	92.09	4	F:GO:0003723; F:GO:0003735; C:GO:0005840; P:GO:0006412	F:RNA binding; F:structural constituent of ribosome; C:ribosome; P:translation			IPR023798 (PFAM); IPR036823 (G3DSA:1.10.455.GENE3D); IPR005716 (TIGRFAM); IPR000235 (PIRSF); IPR000235 (PANTHER); PTHR11205:SF31 (PANTHER); IPR005716 (CDD); IPR036823 (SUPERFAMILY)	F:GO:0003735; P:GO:0006412; C:GO:0015935	F:structural constituent of ribosome; P:translation; C:small ribosomal subunit
SPF_FS5_contig_45	[INTERPRO, BLASTED, MAPPED, GO-SLIM]	gastrula zinc finger protein XlCGF17.1-like	1146	15	1.06466e-80	63.54	1	F:GO:0003674	F:molecular_function			IPR013087 (SMART); G3DSA:3.30.160.60 (GENE3D); G3DSA:3.30.160.60 (GENE3D); G3DSA:3.30.160.60 (GENE3D); G3DSA:3.30.160.60 (GENE3D); G3DSA:3.30.160.60 (GENE3D); G3DSA:3.30.160.60 (GENE3D); IPR013087 (PFAM); G3DSA:3.30.160.60 (GENE3D); PF13912 (PFAM); PTHR24384:SF126 (PANTHER); PTHR24384 (PANTHER); IPR013087 (PROSITE_PROFILES); IPR013087 (PROSITE_PROFILES); IPR013087 (PROSITE_PROFILES); IPR013087 (P…	F:GO:0003676	F:nucleic acid binding
SPF_FS5_contig_46	[INTERPRO, BLASTED, MAPPED, GO-SLIM]	cytochrome c oxidase subunit III (mitochondrion)	1758	15	3.0648e-93	80.51	5	F:GO:0004129; C:GO:0005739; C:GO:0016021; P:GO:0019646; P:GO:1902600	F:cytochrome-c oxidase activity; C:mitochondrion; C:integral component of membrane; P:aerobic electron transport chain; P:proton transmembrane transport	EC:1.9.3.1	Cytochrome-c oxidase	IPR000298 (PFAM); IPR013833 (G3DSA:1.20.120.GENE3D); PTHR11403:SF7 (PANTHER); IPR024791 (PANTHER); IPR000298 (PROSITE_PROFILES); IPR035973 (SUPERFAMILY)	F:GO:0004129; F:GO:0015002; C:GO:0016020; P:GO:0019646; P:GO:0022904	F:cytochrome-c oxidase activity; F:heme-copper terminal oxidase activity; C:membrane; P:aerobic electron transport chain; P:respiratory electron transport chain
SPF_FS5_contig_47	[INTERPRO, BLASTED, MAPPED, GO-SLIM]	cytochrome c oxidase subunit III (mitochondrion)	2806	15	7.57672e-115	80.43	6	F:GO:0004129; C:GO:0005739; P:GO:0015986; C:GO:0016021; P:GO:0019646; C:GO:0045263	F:cytochrome-c oxidase activity; C:mitochondrion; P:ATP synthesis coupled proton transport; C:integral component of membrane; P:aerobic electron transport chain; C:proton-transporting ATP synthase complex, coupling factor F(o)	EC:1.9.3.1	Cytochrome-c oxidase	IPR000568 (PRINTS); IPR035908 (G3DSA:1.20.120.GENE3D); IPR000568 (PFAM); PTHR11410 (PANTHER); IPR035908 (SUPERFAMILY)	F:GO:0015078; P:GO:0015986; C:GO:0045263	F:proton transmembrane transporter activity; P:ATP synthesis coupled proton transport; C:proton-transporting ATP synthase complex, coupling factor F(o)
SPF_FS5_contig_49	[INTERPRO, BLASTED, MAPPED, GO-SLIM]	NADH dehydrogenase subunit 5 (mitochondrion)	2372	15	0	67.88	3	C:GO:0005739; P:GO:0006091; F:GO:0016491	C:mitochondrion; P:generation of precursor metabolites and energy; F:oxidoreductase activity	EC:1.6.99.5; EC:1.6.99.3; EC:1.6.5.3	Acting on NADH or NADPH; NADH dehydrogenase; Acting on NADH or NADPH	IPR001750 (PFAM); PTHR42829:SF2 (PANTHER); PTHR42829 (PANTHER)	no GO terms	no GO terms
SPF_FS5_contig_50	[INTERPRO, BLASTED, MAPPED, GO-SLIM]	syndecan	2222	15	7.09538e-19	71.02	2	P:GO:0007411; C:GO:0016021	P:axon guidance; C:integral component of membrane			IPR027789 (PFAM); mobidb-lite (MOBIDB_LITE); mobidb-lite (MOBIDB_LITE); mobidb-lite (MOBIDB_LITE); mobidb-lite (MOBIDB_LITE); mobidb-lite (MOBIDB_LITE); IPR001050 (PANTHER)	C:GO:0016020	C:membrane
SPF_FS5_contig_51	[INTERPRO, BLASTED, MAPPED, GO-SLIM]	cytochrome c oxidase subunit 1 (mitochondrion)	4064	15	6.95e-89	81.42	10	F:GO:0004129; C:GO:0005743; P:GO:0006119; P:GO:0009060; C:GO:0016021; F:GO:0020037; P:GO:0022900; C:GO:0045277; F:GO:0046872; P:GO:1902600	F:cytochrome-c oxidase activity; C:mitochondrial inner membrane; P:oxidative phosphorylation; P:aerobic respiration; C:integral component of membrane; F:heme binding; P:electron transport chain; C:respiratory chain complex IV; F:metal ion binding; P:proton transmembrane transport	EC:1.9.3.1	Cytochrome-c oxidase	IPR000883 (PFAM); IPR036927 (G3DSA:1.20.210.GENE3D); IPR000883 (PANTHER); IPR023616 (PROSITE_PROFILES); IPR036927 (SUPERFAMILY)	F:GO:0004129; P:GO:0009060; C:GO:0016021; F:GO:0020037; P:GO:0055114	F:cytochrome-c oxidase activity; P:aerobic respiration; C:integral component of membrane; F:heme binding; P:oxidation-reduction process
SPF_FS5_contig_52	[INTERPRO, BLASTED, MAPPED, GO-SLIM]	cytochrome c oxidase subunit 1 (mitochondrion)	2976	15	4.43595e-94	82.26	10	F:GO:0004129; C:GO:0005743; P:GO:0006119; P:GO:0009060; C:GO:0016021; F:GO:0020037; P:GO:0022900; C:GO:0045277; F:GO:0046872; P:GO:1902600	F:cytochrome-c oxidase activity; C:mitochondrial inner membrane; P:oxidative phosphorylation; P:aerobic respiration; C:integral component of membrane; F:heme binding; P:electron transport chain; C:respiratory chain complex IV; F:metal ion binding; P:proton transmembrane transport	EC:1.9.3.1	Cytochrome-c oxidase	IPR000883 (PFAM); IPR036927 (G3DSA:1.20.210.GENE3D); IPR000883 (PANTHER); IPR023616 (PROSITE_PROFILES); IPR036927 (SUPERFAMILY)	F:GO:0004129; P:GO:0009060; C:GO:0016021; F:GO:0020037; P:GO:0055114	F:cytochrome-c oxidase activity; P:aerobic respiration; C:integral component of membrane; F:heme binding; P:oxidation-reduction process
SPF_FS5_contig_54	[INTERPRO, BLASTED, MAPPED, GO-SLIM]	pterin-4-alpha-carbinolamine dehydratase-like	642	15	2.78338e-57	84.91	5	P:GO:0009058; F:GO:0016829; P:GO:0034641; P:GO:0044281; P:GO:0051186	P:biosynthetic process; F:lyase activity; P:cellular nitrogen compound metabolic process; P:small molecule metabolic process; P:cofactor metabolic process	EC:4.2.1.96	4a-hydroxytetrahydrobiopterin dehydratase	IPR001533 (PFAM); IPR036428 (G3DSA:3.30.1360.GENE3D); PTHR12599:SF13 (PANTHER); IPR001533 (PANTHER); IPR001533 (HAMAP); cd00914 (CDD); IPR036428 (SUPERFAMILY)	P:GO:0006729; F:GO:0008124	P:tetrahydrobiopterin biosynthetic process; F:4-alpha-hydroxytetrahydrobiopterin dehydratase activity
SPF_FS5_contig_55	[INTERPRO, BLASTED, MAPPED, GO-SLIM]	dynein heavy chain 5, axonemal-like	14649	15	0	84.51	4	C:GO:0005856; P:GO:0008150; C:GO:0032991; F:GO:0043167	C:cytoskeleton; P:biological_process; C:protein-containing complex; F:ion binding	EC:3.6.1.15	Nucleoside-triphosphate phosphatase	IPR003593 (SMART); G3DSA:1.10.8.720 (GENE3D); G3DSA:1.20.140.100 (GENE3D); IPR013602 (PFAM); IPR004273 (PFAM); PF12775 (PFAM); G3DSA:3.40.50.300 (GENE3D); G3DSA:1.10.472.130 (GENE3D); G3DSA:1.20.920.20 (GENE3D); IPR041658 (PFAM); G3DSA:1.20.920.30 (GENE3D); IPR041466 (PFAM); G3DSA:3.40.50.11510 (GENE3D); G3DSA:3.40.50.300 (GENE3D); G3DSA:1.10.8.710 (GENE3D); IPR035699 (PFAM); G3DSA:1.20.58.1120 (…	F:GO:0003777; F:GO:0005524; P:GO:0007018; C:GO:0030286	F:microtubule motor activity; F:ATP binding; P:microtubule-based movement; C:dynein complex
SPF_FS5_contig_56	[INTERPRO, BLASTED, MAPPED, GO-SLIM]	disintegrin and metalloproteinase domain-containing protein 10 isoform X1	1976	15	3.49763e-154	57.01	3	F:GO:0004222; P:GO:0006508; C:GO:0016020	F:metalloendopeptidase activity; P:proteolysis; C:membrane			IPR001762 (SMART); PF13574 (PFAM); IPR002870 (PFAM); IPR024079 (G3DSA:3.40.390.GENE3D); IPR036436 (G3DSA:4.10.70.GENE3D); IPR001762 (PFAM); PTHR11905:SF209 (PANTHER); PTHR11905 (PANTHER); IPR001590 (PROSITE_PROFILES); IPR001762 (PROSITE_PROFILES); IPR036436 (SUPERFAMILY); SSF55486 (SUPERFAMILY)	F:GO:0004222; P:GO:0006508; F:GO:0008237	F:metalloendopeptidase activity; P:proteolysis; F:metallopeptidase activity
SPF_FS5_contig_57	[INTERPRO, BLASTED, MAPPED, GO-SLIM]	actin-related protein 3	4075	15	0	93.09	3	F:GO:0005524; C:GO:0005885; P:GO:0034314	F:ATP binding; C:Arp2/3 protein complex; P:Arp2/3 complex-mediated actin nucleation			IPR004000 (SMART); G3DSA:3.90.640.10 (GENE3D); G3DSA:3.30.420.40 (GENE3D); IPR004000 (PFAM); G3DSA:3.30.420.40 (GENE3D); IPR004000 (PANTHER); IPR015623 (PTHR11937:PANTHER); cd00012 (CDD); SSF53067 (SUPERFAMILY); SSF53067 (SUPERFAMILY)	F:GO:0005524; C:GO:0005885; P:GO:0007015; P:GO:0034314	F:ATP binding; C:Arp2/3 protein complex; P:actin filament organization; P:Arp2/3 complex-mediated actin nucleation
SPF_FS5_contig_60	[INTERPRO, BLASTED, MAPPED, GO-SLIM]	40S ribosomal protein S14	619	15	8.36593e-87	92.87	3	F:GO:0003735; P:GO:0006412; C:GO:0022627	F:structural constituent of ribosome; P:translation; C:cytosolic small ribosomal subunit			IPR036967 (G3DSA:3.30.420.GENE3D); IPR001971 (PFAM); IPR001971 (PIRSF); mobidb-lite (MOBIDB_LITE); mobidb-lite (MOBIDB_LITE); mobidb-lite (MOBIDB_LITE); IPR001971 (PANTHER); PTHR11759:SF11 (PANTHER); IPR001971 (HAMAP); SSF53137 (SUPERFAMILY)	F:GO:0003735; C:GO:0005840; P:GO:0006412	F:structural constituent of ribosome; C:ribosome; P:translation
SPF_FS5_contig_62	[INTERPRO, BLASTED, MAPPED, GO-SLIM]	annexin A4-like isoform X1	1300	15	1.26862e-116	70.45	2	F:GO:0005509; F:GO:0005544	F:calcium ion binding; F:calcium-dependent phospholipid binding			IPR001464 (PRINTS); IPR018502 (SMART); IPR037104 (G3DSA:1.10.220.GENE3D); IPR037104 (G3DSA:1.10.220.GENE3D); IPR018502 (PFAM); IPR037104 (G3DSA:1.10.220.GENE3D); IPR037104 (G3DSA:1.10.220.GENE3D); PTHR10502 (PANTHER); PTHR10502:SF173 (PANTHER); SSF47874 (SUPERFAMILY)	F:GO:0005509; F:GO:0005544	F:calcium ion binding; F:calcium-dependent phospholipid binding
SPF_FS5_contig_63	[BLASTED, MAPPED, ANNOTATED]	galectin 4-like protein transcript variant	1471	15	3.05595e-63	57.98	1	F:GO:0030246	F:carbohydrate binding
SPF_FS5_contig_65	[INTERPRO, BLASTED, MAPPED, GO-SLIM]	PHD finger protein 13-like	650	15	1.30549e-42	62.52	1	F:GO:0043167	F:ion binding			IPR001965 (SMART); IPR013083 (G3DSA:3.30.40.GENE3D); mobidb-lite (MOBIDB_LITE); mobidb-lite (MOBIDB_LITE); PTHR14571 (PANTHER); PTHR14571 (PANTHER); PTHR14571:SF11 (PANTHER); PTHR14571:SF11 (PANTHER); cd15546 (CDD); IPR011011 (SUPERFAMILY)	no GO terms	no GO terms
SPF_FS5_contig_66	[INTERPRO, BLASTED, MAPPED, GO-SLIM]	death ligand signal enhancer-like isoform X1	1222	15	7.53439e-14	56.5	2	F:GO:0005515; F:GO:0016787	F:protein binding; F:hydrolase activity			IPR006597 (SMART); IPR011990 (G3DSA:1.25.40.GENE3D); IPR006597 (PFAM); mobidb-lite (MOBIDB_LITE); mobidb-lite (MOBIDB_LITE); mobidb-lite (MOBIDB_LITE); mobidb-lite (MOBIDB_LITE); mobidb-lite (MOBIDB_LITE); PTHR45011 (PANTHER); SSF81901 (SUPERFAMILY)	F:GO:0005515	F:protein binding
SPF_FS5_contig_68	[INTERPRO, BLASTED, MAPPED, GO-SLIM]	uncharacterized protein LOC111863443	1368	15	4.49286e-05	61	2	F:GO:0003700; P:GO:0006357	F:DNA-binding transcription factor activity; P:regulation of transcription by RNA polymerase II			IPR004827 (SMART); IPR004827 (PFAM); G3DSA:1.20.5.170 (GENE3D); mobidb-lite (MOBIDB_LITE); mobidb-lite (MOBIDB_LITE); IPR040223 (PANTHER); PTHR11988:SF27 (PANTHER); IPR004827 (PROSITE_PROFILES); cd14813 (CDD); SSF57959 (SUPERFAMILY)	F:GO:0003700; P:GO:0006355; P:GO:0006357	F:DNA-binding transcription factor activity; P:regulation of transcription, DNA-templated; P:regulation of transcription by RNA polymerase II
SPF_FS5_contig_69	[INTERPRO, BLASTED, MAPPED, GO-SLIM]	putative serine protease K12H4.7	2235	15	0	73.74	3	P:GO:0006508; F:GO:0008236; F:GO:0008239	P:proteolysis; F:serine-type peptidase activity; F:dipeptidyl-peptidase activity	EC:3.4.11	Acting on peptide bonds (peptidases)	IPR008758 (PFAM); G3DSA:1.20.120.980 (GENE3D); IPR029058 (G3DSA:3.40.50.GENE3D); PTHR11010 (PANTHER); PTHR11010:SF11 (PANTHER); IPR029058 (SUPERFAMILY)	P:GO:0006508; F:GO:0008236	P:proteolysis; F:serine-type peptidase activity
SPF_FS5_contig_72	[INTERPRO, BLASTED, MAPPED, GO-SLIM]	vascular endothelial growth factor A-A-like isoform X1	876	15	1.47448e-18	50.2	2	F:GO:0008083; C:GO:0016020	F:growth factor activity; C:membrane			IPR029034 (G3DSA:2.10.90.GENE3D); IPR000072 (PFAM); PTHR11633:SF1 (PANTHER); PTHR11633 (PANTHER); IPR000072 (PROSITE_PROFILES); IPR029034 (SUPERFAMILY)	F:GO:0008083; C:GO:0016020	F:growth factor activity; C:membrane
SPF_FS5_contig_74	[INTERPRO, BLASTED, MAPPED, GO-SLIM]	blastula protease 10-like	1275	15	1.31154e-30	55.3	3	F:GO:0004222; P:GO:0006508; F:GO:0008270	F:metalloendopeptidase activity; P:proteolysis; F:zinc ion binding			IPR001506 (PRINTS); IPR006026 (SMART); IPR001506 (PFAM); IPR024079 (G3DSA:3.40.390.GENE3D); PTHR10127 (PANTHER); IPR034035 (CDD); SSF55486 (SUPERFAMILY)	F:GO:0004222; P:GO:0006508; F:GO:0008237; F:GO:0008270	F:metalloendopeptidase activity; P:proteolysis; F:metallopeptidase activity; F:zinc ion binding
SPF_FS5_contig_76	[INTERPRO, BLASTED, MAPPED, GO-SLIM]	nucleolin-like isoform X1	1056	15	9.01088e-46	65.06	4	P:GO:0002181; F:GO:0003725; F:GO:0003727; P:GO:0034622	P:cytoplasmic translation; F:double-stranded RNA binding; F:single-stranded RNA binding; P:cellular protein-containing complex assembly			IPR000504 (SMART); IPR000504 (PFAM); IPR012677 (G3DSA:3.30.70.GENE3D); IPR012677 (G3DSA:3.30.70.GENE3D); mobidb-lite (MOBIDB_LITE); mobidb-lite (MOBIDB_LITE); mobidb-lite (MOBIDB_LITE); PTHR44769 (PANTHER); IPR000504 (PROSITE_PROFILES); IPR000504 (PROSITE_PROFILES); IPR035979 (SUPERFAMILY); IPR035979 (SUPERFAMILY)	F:GO:0003676	F:nucleic acid binding
SPF_FS5_contig_77	[INTERPRO, BLASTED, MAPPED, GO-SLIM]	serine/threonine-protein phosphatase PP1-alpha catalytic subunit	1422	15	0	95.79	5	C:GO:0000164; F:GO:0004722; P:GO:0006470; F:GO:0046872; C:GO:0072357	C:protein phosphatase type 1 complex; F:protein serine/threonine phosphatase activity; P:protein dephosphorylation; F:metal ion binding; C:PTW/PP1 phosphatase complex	EC:3.1.3.16	Protein-serine/threonine phosphatase	IPR006186 (PRINTS); IPR006186 (SMART); IPR029052 (G3DSA:3.60.21.GENE3D); IPR004843 (PFAM); IPR031675 (PFAM); mobidb-lite (MOBIDB_LITE); PTHR11668 (PANTHER); IPR037981 (PTHR11668:PANTHER); cd07414 (CDD); SSF56300 (SUPERFAMILY)	C:GO:0000164; F:GO:0004722; F:GO:0016787	C:protein phosphatase type 1 complex; F:protein serine/threonine phosphatase activity; F:hydrolase activity
SPF_FS5_contig_78	[INTERPRO, BLASTED, MAPPED, GO-SLIM]	heat shock protein 83	2393	15	0	90.23	7	C:GO:0005829; C:GO:0005886; P:GO:0006457; P:GO:0006950; C:GO:0032991; F:GO:0043167; F:GO:0051082	C:cytosol; C:plasma membrane; P:protein folding; P:response to stress; C:protein-containing complex; F:ion binding; F:unfolded protein binding			IPR020575 (PRINTS); IPR003594 (SMART); IPR001404 (PIRSF); G3DSA:3.30.70.2140 (GENE3D); IPR001404 (PFAM); IPR036890 (G3DSA:3.30.565.GENE3D); G3DSA:3.30.230.80 (GENE3D); G3DSA:3.40.50.11260 (GENE3D); IPR003594 (PFAM); IPR037196 (G3DSA:1.20.120.GENE3D); mobidb-lite (MOBIDB_LITE); mobidb-lite (MOBIDB_LITE); mobidb-lite (MOBIDB_LITE); PTHR11528:SF72 (PANTHER); IPR001404 (PANTHER); IPR001404 (HAMAP); I…	F:GO:0005524; P:GO:0006457; F:GO:0051082	F:ATP binding; P:protein folding; F:unfolded protein binding
SPF_FS5_contig_79	[INTERPRO, BLASTED, MAPPED, GO-SLIM]	renin receptor-like	1885	15	2.33151e-36	48.94	3	C:GO:0016021; P:GO:0035622; F:GO:0038023	C:integral component of membrane; P:intrahepatic bile duct development; F:signaling receptor activity			IPR012493 (PFAM); PTHR13351:SF1 (PANTHER); IPR012493 (PANTHER)	C:GO:0016021; F:GO:0038023	C:integral component of membrane; F:signaling receptor activity
SPF_FS5_contig_80	[INTERPRO, BLASTED, MAPPED, GO-SLIM]	Golgi-associated plant pathogenesis-related protein 1	858	15	5.9392e-28	63.01	1	C:GO:0005615	C:extracellular space			IPR002413 (PRINTS); IPR001283 (PRINTS); IPR014044 (SMART); IPR035940 (G3DSA:3.40.33.GENE3D); IPR014044 (PFAM); PTHR10334:SF332 (PANTHER); IPR001283 (PANTHER); IPR034113 (CDD); IPR035940 (SUPERFAMILY)	no GO terms	no GO terms
SPF_FS5_contig_81	[INTERPRO, BLASTED, MAPPED, GO-SLIM]	60S ribosomal protein L32	715	15	9.72466e-80	91.08	3	F:GO:0003735; C:GO:0005840; P:GO:0006412	F:structural constituent of ribosome; C:ribosome; P:translation			IPR001515 (SMART); IPR001515 (PFAM); PTHR23413:SF13 (PANTHER); IPR001515 (PANTHER); IPR001515 (PRODOM); IPR001515 (CDD); IPR036351 (SUPERFAMILY)	F:GO:0003735; C:GO:0005622; C:GO:0005840; P:GO:0006412	F:structural constituent of ribosome; C:intracellular; C:ribosome; P:translation
SPF_FS5_contig_82	[INTERPRO, BLASTED, MAPPED, GO-SLIM]	prefoldin subunit 3	834	15	1.95137e-80	77.58	5	C:GO:0005737; P:GO:0006457; F:GO:0008092; C:GO:0032991; P:GO:0065003	C:cytoplasm; P:protein folding; F:cytoskeletal protein binding; C:protein-containing complex; P:protein-containing complex assembly			IPR004127 (PFAM); IPR009053 (G3DSA:1.10.287.GENE3D); IPR016655 (PIRSF); IPR016655 (PANTHER); cd00584 (CDD); SSF46579 (SUPERFAMILY)	P:GO:0006457; C:GO:0016272	P:protein folding; C:prefoldin complex
SPF_FS5_contig_84	[INTERPRO, BLASTED, MAPPED, GO-SLIM]	dimethylaniline monooxygenase [N-oxide-forming] 5-like	3495	15	1.30576e-143	67.21	6	F:GO:0004499; C:GO:0016020; C:GO:0043231; F:GO:0050660; F:GO:0050661; P:GO:0055114	F:N,N-dimethylaniline monooxygenase activity; C:membrane; C:intracellular membrane-bounded organelle; F:flavin adenine dinucleotide binding; F:NADP binding; P:oxidation-reduction process			IPR000960 (PRINTS); IPR036188 (G3DSA:3.50.50.GENE3D); IPR020946 (PFAM); IPR000960 (PIRSF); PTHR23023 (PANTHER); PTHR23023:SF157 (PANTHER); IPR036188 (SUPERFAMILY); IPR036188 (SUPERFAMILY); IPR036188 (SUPERFAMILY)	F:GO:0004499; F:GO:0050660; F:GO:0050661; P:GO:0055114	F:N,N-dimethylaniline monooxygenase activity; F:flavin adenine dinucleotide binding; F:NADP binding; P:oxidation-reduction process
SPF_FS5_contig_85	[INTERPRO, BLASTED, MAPPED, GO-SLIM]	probable serine carboxypeptidase CPVL isoform X1	1862	15	0	76.37	2	F:GO:0004185; P:GO:0051603	F:serine-type carboxypeptidase activity; P:proteolysis involved in cellular protein catabolic process	EC:3.4.21; EC:3.4.16	Acting on peptide bonds (peptidases); Acting on peptide bonds (peptidases)	IPR001563 (PRINTS); IPR001563 (PFAM); IPR029058 (G3DSA:3.40.50.GENE3D); IPR001563 (PANTHER); PTHR11802:SF98 (PANTHER); IPR029058 (SUPERFAMILY)	F:GO:0004185; P:GO:0006508	F:serine-type carboxypeptidase activity; P:proteolysis
SPF_FS5_contig_86	[INTERPRO, BLASTED, MAPPED, GO-SLIM]	polyadenylate-binding protein 1	2387	15	0	71.74	1	F:GO:0003723	F:RNA binding			IPR000504 (SMART); IPR002004 (SMART); IPR012677 (G3DSA:3.30.70.GENE3D); IPR012677 (G3DSA:3.30.70.GENE3D); IPR006515 (TIGRFAM); G3DSA:1.10.1900.10 (GENE3D); IPR012677 (G3DSA:3.30.70.GENE3D); IPR000504 (PFAM); IPR012677 (G3DSA:3.30.70.GENE3D); IPR002004 (PFAM); mobidb-lite (MOBIDB_LITE); mobidb-lite (MOBIDB_LITE); PTHR24012 (PANTHER); PTHR24012:SF466 (PANTHER); IPR000504 (PROSITE_PROFILES); IPR0020…	F:GO:0003676; F:GO:0003723	F:nucleic acid binding; F:RNA binding
SPF_FS5_contig_87	[INTERPRO, BLASTED, MAPPED, GO-SLIM]	UTP--glucose-1-phosphate uridylyltransferase	3468	15	0	78.64	2	F:GO:0003983; P:GO:0006011	F:UTP:glucose-1-phosphate uridylyltransferase activity; P:UDP-glucose metabolic process	EC:2.7.7.64; EC:2.7.7.9	UTP-monosaccharide-1-phosphate uridylyltransferase; UTP--glucose-1-phosphate uridylyltransferase	G3DSA:2.160.10.10 (GENE3D); IPR029044 (G3DSA:3.90.550.GENE3D); IPR016267 (PIRSF); IPR002618 (PFAM); PTHR43511 (PANTHER); PTHR43511:SF4 (PANTHER); IPR016267 (CDD); IPR029044 (SUPERFAMILY)	F:GO:0003983; P:GO:0006011; F:GO:0070569	F:UTP:glucose-1-phosphate uridylyltransferase activity; P:UDP-glucose metabolic process; F:uridylyltransferase activity
SPF_FS5_contig_88	[INTERPRO, BLASTED, MAPPED, GO-SLIM]	60S ribosomal protein L27a	598	15	6.08081e-65	90.06	3	F:GO:0003735; P:GO:0006412; C:GO:0022625	F:structural constituent of ribosome; P:translation; C:cytosolic large ribosomal subunit			G3DSA:3.100.10.10 (GENE3D); IPR021131 (PFAM); mobidb-lite (MOBIDB_LITE); mobidb-lite (MOBIDB_LITE); PTHR11721 (PANTHER); PTHR11721:SF11 (PANTHER); IPR030878 (HAMAP); IPR036227 (SUPERFAMILY)	F:GO:0003735; P:GO:0006412; C:GO:0015934	F:structural constituent of ribosome; P:translation; C:large ribosomal subunit
SPF_FS5_contig_89	[INTERPRO, BLASTED, MAPPED, GO-SLIM]	N,N'-diacetylchitobiase precursor	2847	15	0	54.77	3	F:GO:0004563; P:GO:0005975; F:GO:0030247	F:beta-N-acetylhexosaminidase activity; P:carbohydrate metabolic process; F:polysaccharide binding			IPR025705 (PRINTS); IPR004866 (SMART); IPR004866 (PFAM); IPR015883 (PFAM); G3DSA:3.20.20.80 (GENE3D); IPR012291 (G3DSA:2.60.40.GENE3D); IPR015882 (PFAM); IPR029018 (G3DSA:3.30.379.GENE3D); IPR004867 (PFAM); IPR013783 (G3DSA:2.60.40.GENE3D); mobidb-lite (MOBIDB_LITE); mobidb-lite (MOBIDB_LITE); PTHR22600:SF12 (PANTHER); PTHR22600 (PANTHER); IPR008965 (SUPERFAMILY); IPR017853 (SUPERFAMILY); IPR0290…	F:GO:0004553; F:GO:0004563; P:GO:0005975; F:GO:0030246; F:GO:0030247	F:hydrolase activity, hydrolyzing O-glycosyl compounds; F:beta-N-acetylhexosaminidase activity; P:carbohydrate metabolic process; F:carbohydrate binding; F:polysaccharide binding
SPF_FS5_contig_93	[INTERPRO, BLASTED, MAPPED, GO-SLIM]	KN motif and ankyrin repeat domain-containing protein 1-like isoform X1	378	15	5.27252e-18	62.91	3	C:GO:0005737; P:GO:0007010; P:GO:0065003	C:cytoplasm; P:cytoskeleton organization; P:protein-containing complex assembly			IPR036770 (G3DSA:1.25.40.GENE3D); PTHR24168 (PANTHER)	no GO terms	no GO terms
SPF_FS5_contig_94	[INTERPRO, BLASTED, MAPPED, GO-SLIM]	SAP30-binding protein-like	1193	15	2.38418e-40	74.69	2	P:GO:0009058; P:GO:0034641	P:biosynthetic process; P:cellular nitrogen compound metabolic process			IPR012479 (PFAM); mobidb-lite (MOBIDB_LITE); mobidb-lite (MOBIDB_LITE); mobidb-lite (MOBIDB_LITE); mobidb-lite (MOBIDB_LITE); mobidb-lite (MOBIDB_LITE); IPR012479 (PANTHER)	P:GO:0006355	P:regulation of transcription, DNA-templated
SPF_FS5_contig_95	[INTERPRO, BLASTED, MAPPED, GO-SLIM]	Malate dehydrogenase, cytoplasmic	1881	15	5.15283e-152	81.94	7	C:GO:0005829; P:GO:0005975; P:GO:0006099; P:GO:0006107; P:GO:0006108; P:GO:0006734; F:GO:0030060	C:cytosol; P:carbohydrate metabolic process; P:tricarboxylic acid cycle; P:oxaloacetate metabolic process; P:malate metabolic process; P:NADH metabolic process; F:L-malate dehydrogenase activity	EC:1.1.1.37	Malate dehydrogenase	IPR001557 (PIRSF); IPR022383 (PFAM); IPR011274 (TIGRFAM); IPR001236 (PFAM); IPR010945 (TIGRFAM); IPR015955 (G3DSA:3.90.110.GENE3D); G3DSA:3.40.50.720 (GENE3D); PTHR23382:SF3 (PANTHER); IPR010945 (PANTHER); IPR010945 (HAMAP); IPR011274 (CDD); IPR036291 (SUPERFAMILY); IPR015955 (SUPERFAMILY)	F:GO:0003824; P:GO:0005975; P:GO:0006108; F:GO:0016491; F:GO:0016615; F:GO:0016616; P:GO:0019752; F:GO:0030060; P:GO:0055114	F:catalytic activity; P:carbohydrate metabolic process; P:malate metabolic process; F:oxidoreductase activity; F:malate dehydrogenase activity; F:oxidoreductase activity, acting on the CH-OH group of donors, NAD or NADP as acceptor; P:carboxylic acid metabolic process; F:L-malate dehydrogenase activity; P:oxidation-reduction process
SPF_FS5_contig_96	[INTERPRO, BLASTED, MAPPED, GO-SLIM]	protein SET-like	1156	15	3.39994e-103	84.46	3	C:GO:0005634; P:GO:0051276; P:GO:0065003	C:nucleus; P:chromosome organization; P:protein-containing complex assembly			G3DSA:3.30.1120.90 (GENE3D); IPR002164 (PFAM); mobidb-lite (MOBIDB_LITE); mobidb-lite (MOBIDB_LITE); mobidb-lite (MOBIDB_LITE); mobidb-lite (MOBIDB_LITE); IPR002164 (PANTHER); PTHR11875:SF67 (PANTHER); IPR037231 (SUPERFAMILY)	C:GO:0005634; P:GO:0006334	C:nucleus; P:nucleosome assembly
SPF_FS5_contig_97	[INTERPRO, BLASTED, MAPPED, GO-SLIM]	microsomal glutathione S-transferase 1	669	15	2.90023e-28	62.9	2	F:GO:0003674; P:GO:0008150	F:molecular_function; P:biological_process			IPR001129 (PFAM); IPR023352 (G3DSA:1.20.120.GENE3D); IPR040162 (PANTHER); IPR023352 (SUPERFAMILY)	no GO terms	no GO terms
SPF_FS5_contig_98	[INTERPRO, BLASTED, MAPPED, GO-SLIM]	microsomal glutathione S-transferase 1-like	795	15	1.55625e-27	64.09	2	F:GO:0003674; P:GO:0008150	F:molecular_function; P:biological_process			IPR001129 (PFAM); IPR023352 (G3DSA:1.20.120.GENE3D); IPR040162 (PANTHER); IPR023352 (SUPERFAMILY)	no GO terms	no GO terms
SPF_FS5_contig_99	[INTERPRO, BLASTED, MAPPED, GO-SLIM]	Vacuolar protein sorting-associated protein 4B	2804	15	1.7663e-152	86.68	19	C:GO:0005634; C:GO:0005768; C:GO:0005815; C:GO:0005829; P:GO:0006914; P:GO:0007010; P:GO:0007034; P:GO:0007059; P:GO:0008219; P:GO:0016192; F:GO:0016887; P:GO:0022607; P:GO:0040011; F:GO:0043167; P:GO:0044403; P:GO:0051276; P:GO:0051301; P:GO:0061024; P:GO:0140014	C:nucleus; C:endosome; C:microtubule organizing center; C:cytosol; P:autophagy; P:cytoskeleton organization; P:vacuolar transport; P:chromosome segregation; P:cell death; P:vesicle-mediated transport; F:ATPase activity; P:cellular component assembly; P:locomotion; F:ion binding; P:symbiotic process; P:chromosome organization; P:cell division; P:membrane organization; P:mitotic nuclear division	EC:3.6.1.3; EC:3.6.1.15	Adenosinetriphosphatase; Nucleoside-triphosphate phosphatase	IPR007330 (SMART); IPR003593 (SMART); G3DSA:1.20.58.280 (GENE3D); IPR003959 (PFAM); G3DSA:3.40.50.300 (GENE3D); IPR007330 (PFAM); mobidb-lite (MOBIDB_LITE); mobidb-lite (MOBIDB_LITE); PTHR23074:SF83 (PANTHER); PTHR23074 (PANTHER); cd00009 (CDD); cd02678 (CDD); IPR027417 (SUPERFAMILY); IPR036181 (SUPERFAMILY)	F:GO:0005524	F:ATP binding
SPF_FS5_contig_100	[INTERPRO, BLASTED, MAPPED, GO-SLIM]	eukaryotic translation initiation factor 3 subunit M	1499	15	1.28492e-137	69.74	4	P:GO:0002183; F:GO:0003743; C:GO:0005852; C:GO:0070993	P:cytoplasmic translational initiation; F:translation initiation factor activity; C:eukaryotic translation initiation factor 3 complex; C:translation preinitiation complex			SM00753 (SMART); IPR000717 (SMART); G3DSA:1.25.40.570 (GENE3D); IPR040750 (PFAM); IPR000717 (PFAM); PTHR15350 (PANTHER); PTHR15350:SF2 (PANTHER); IPR000717 (PROSITE_PROFILES); IPR027528 (HAMAP); IPR036390 (SUPERFAMILY)	F:GO:0003743; C:GO:0005737; C:GO:0005852	F:translation initiation factor activity; C:cytoplasm; C:eukaryotic translation initiation factor 3 complex
SPF_FS5_contig_101	[INTERPRO, BLASTED, MAPPED, GO-SLIM]	myosin regulatory light chain	762	15	1.56895e-61	75.86	1	F:GO:0043167	F:ion binding			IPR002048 (SMART); G3DSA:1.10.238.10 (GENE3D); G3DSA:1.10.238.10 (GENE3D); PTHR23049 (PANTHER); PTHR23049:SF59 (PANTHER); IPR002048 (PROSITE_PROFILES); IPR002048 (PROSITE_PROFILES); IPR011992 (SUPERFAMILY)	F:GO:0005509	F:calcium ion binding
SPF_FS5_contig_102	[INTERPRO, BLASTED, MAPPED, GO-SLIM]	Cytochrome c oxidase subunit 6C-2	654	15	1.27185e-14	64.3	4	C:GO:0005575; P:GO:0006091; F:GO:0016491; F:GO:0022857	C:cellular_component; P:generation of precursor metabolites and energy; F:oxidoreductase activity; F:transmembrane transporter activity	EC:1.9.3.1	Cytochrome-c oxidase	IPR034884 (PFAM); IPR037169 (G3DSA:4.10.93.GENE3D); IPR004204 (PRODOM); PS51257 (PROSITE_PROFILES); IPR037169 (SUPERFAMILY)	F:GO:0004129	F:cytochrome-c oxidase activity
SPF_FS5_contig_103	[INTERPRO, BLASTED, MAPPED, GO-SLIM]	calreticulin	1590	15	1.00493e-173	86.2	4	F:GO:0005509; C:GO:0005783; P:GO:0006457; F:GO:0051082	F:calcium ion binding; C:endoplasmic reticulum; P:protein folding; F:unfolded protein binding			IPR001580 (PRINTS); IPR001580 (PFAM); G3DSA:2.60.120.200 (GENE3D); IPR009169 (PIRSF); G3DSA:2.60.120.200 (GENE3D); IPR009033 (G3DSA:2.10.250.GENE3D); mobidb-lite (MOBIDB_LITE); mobidb-lite (MOBIDB_LITE); mobidb-lite (MOBIDB_LITE); mobidb-lite (MOBIDB_LITE); mobidb-lite (MOBIDB_LITE); mobidb-lite (MOBIDB_LITE); PTHR11073:SF19 (PANTHER); IPR001580 (PANTHER); IPR009033 (SUPERFAMILY); IPR013320 (SUPE…	F:GO:0005509; F:GO:0005515; C:GO:0005783; P:GO:0006457; F:GO:0051082	F:calcium ion binding; F:protein binding; C:endoplasmic reticulum; P:protein folding; F:unfolded protein binding
SPF_FS5_contig_104	[INTERPRO, BLASTED, MAPPED, GO-SLIM]	ribosomal protein S6	861	15	1.06039e-104	85.88	19	P:GO:0000082; P:GO:0001890; P:GO:0002309; F:GO:0003735; C:GO:0005844; P:GO:0006364; P:GO:0006412; P:GO:0006924; P:GO:0007093; P:GO:0007369; P:GO:0022605; C:GO:0022627; C:GO:0030425; P:GO:0033077; P:GO:0042274; P:GO:0042593; P:GO:0043066; C:GO:0048471; P:GO:0048821	P:G1/S transition of mitotic cell cycle; P:placenta development; P:T cell proliferation involved in immune response; F:structural constituent of ribosome; C:polysome; P:rRNA processing; P:translation; P:activation-induced cell death of T cells; P:mitotic cell cycle checkpoint; P:gastrulation; P:mammalian oogenesis stage; C:cytosolic small ribosomal subunit; C:dendrite; P:T cell differentiation in…			IPR001377 (SMART); IPR014401 (PIRSF); IPR001377 (PFAM); mobidb-lite (MOBIDB_LITE); IPR001377 (PANTHER)	F:GO:0003735; C:GO:0005622; C:GO:0005840; P:GO:0006412	F:structural constituent of ribosome; C:intracellular; C:ribosome; P:translation
SPF_FS5_contig_105	[INTERPRO, BLASTED, MAPPED, GO-SLIM]	gtp-binding nuclear protein ran	654	15	3.04166e-100	82.1	5	F:GO:0003924; F:GO:0005525; C:GO:0005634; C:GO:0005737; P:GO:0006606	F:GTPase activity; F:GTP binding; C:nucleus; C:cytoplasm; P:protein import into nucleus	EC:3.6.1.15	Nucleoside-triphosphate phosphatase	IPR002041 (PRINTS); SM00174 (SMART); SM00173 (SMART); SM00175 (SMART); SM00176 (SMART); IPR001806 (PFAM); IPR005225 (TIGRFAM); G3DSA:3.40.50.300 (GENE3D); PTHR24071:SF2 (PANTHER); IPR002041 (PANTHER); IPR002041 (PROSITE_PROFILES); cd00877 (CDD); IPR027417 (SUPERFAMILY)	F:GO:0003924; F:GO:0005525; P:GO:0006913	F:GTPase activity; F:GTP binding; P:nucleocytoplasmic transport
SPF_FS5_contig_106	[INTERPRO, BLASTED, MAPPED, GO-SLIM]	solute carrier family 2, facilitated glucose transporter member 4 isoform X1	677	15	4.16577e-39	66.84	25	F:GO:0005360; F:GO:0005515; C:GO:0005771; C:GO:0005829; C:GO:0005887; C:GO:0005905; C:GO:0009986; P:GO:0010021; C:GO:0016529; C:GO:0030140; C:GO:0030315; C:GO:0030659; C:GO:0032593; P:GO:0044381; C:GO:0045121; P:GO:0045471; C:GO:0048471; P:GO:0050873; F:GO:0055056; C:GO:0070062; P:GO:0071356; P:GO:0071456; P:GO:0071470; P:GO:0098694; C:GO:0098793	F:insulin-responsive glucose:proton symporter activity; F:protein binding; C:multivesicular body; C:cytosol; C:integral component of plasma membrane; C:clathrin-coated pit; C:cell surface; P:amylopectin biosynthetic process; C:sarcoplasmic reticulum; C:trans-Golgi network transport vesicle; C:T-tubule; C:cytoplasmic vesicle membrane; C:insulin-responsive compartment; P:glucose import in response …			IPR003663 (PRINTS); G3DSA:1.20.1250.20 (GENE3D); IPR005828 (PFAM); PTHR23503 (PANTHER); IPR020846 (PROSITE_PROFILES); IPR020846 (CDD); IPR036259 (SUPERFAMILY)	C:GO:0016020; C:GO:0016021; F:GO:0022857; P:GO:0055085	C:membrane; C:integral component of membrane; F:transmembrane transporter activity; P:transmembrane transport
SPF_FS5_contig_107	[INTERPRO, BLASTED, MAPPED, GO-SLIM]	S-phase kinase-associated protein 1	963	15	6.62387e-86	96.5	2	P:GO:0009056; F:GO:0016301	P:catabolic process; F:kinase activity			IPR001232 (SMART); IPR016073 (PFAM); IPR016072 (PFAM); G3DSA:3.30.710.10 (GENE3D); IPR016897 (PIRSF); PTHR11165 (PANTHER); PTHR11165:SF24 (PANTHER); IPR036296 (SUPERFAMILY); IPR011333 (SUPERFAMILY)	P:GO:0006511	P:ubiquitin-dependent protein catabolic process
SPF_FS5_contig_108	[INTERPRO, BLASTED, MAPPED, GO-SLIM]	cytochrome b (mitochondrion)	1000	15	6.67811e-84	77.08	6	C:GO:0005743; P:GO:0006122; F:GO:0008121; C:GO:0016021; C:GO:0045275; F:GO:0046872	C:mitochondrial inner membrane; P:mitochondrial electron transport, ubiquinol to cytochrome c; F:ubiquinol-cytochrome-c reductase activity; C:integral component of membrane; C:respiratory chain complex III; F:metal ion binding	EC:1.10.2; EC:1.10.2.2	Acting on diphenols and related substances as donors; Acting on diphenols and related substances as donors	IPR005798 (PFAM); IPR027387 (G3DSA:1.20.810.GENE3D); PTHR19271:SF9 (PANTHER); PTHR19271 (PANTHER); IPR005798 (PROSITE_PROFILES); IPR005798 (CDD); IPR036150 (SUPERFAMILY)	F:GO:0009055; C:GO:0016020; F:GO:0016491	F:electron transfer activity; C:membrane; F:oxidoreductase activity
SPF_FS5_contig_109	[INTERPRO, BLASTED, MAPPED, GO-SLIM]	serine palmitoyltransferase 2-like	2417	15	0	77.82	4	P:GO:0009058; C:GO:0016021; F:GO:0016740; F:GO:0030170	P:biosynthetic process; C:integral component of membrane; F:transferase activity; F:pyridoxal phosphate binding			IPR015421 (G3DSA:3.40.640.GENE3D); IPR015422 (G3DSA:3.90.1150.GENE3D); IPR004839 (PFAM); mobidb-lite (MOBIDB_LITE); PTHR13693:SF79 (PANTHER); PTHR13693 (PANTHER); cd06454 (CDD); IPR015424 (SUPERFAMILY)	F:GO:0003824; P:GO:0009058; F:GO:0030170	F:catalytic activity; P:biosynthetic process; F:pyridoxal phosphate binding
SPF_FS5_contig_110	[INTERPRO, BLASTED, MAPPED, GO-SLIM]	E3 ubiquitin-protein ligase rnf213-alpha-like isoform X1	16607	15	0	51.67	2	F:GO:0004842; F:GO:0016887	F:ubiquitin-protein transferase activity; F:ATPase activity			IPR003593 (SMART); IPR001841 (SMART); G3DSA:3.40.50.300 (GENE3D); IPR013083 (G3DSA:3.30.40.GENE3D); PF14447 (PFAM); G3DSA:3.40.50.300 (GENE3D); mobidb-lite (MOBIDB_LITE); mobidb-lite (MOBIDB_LITE); mobidb-lite (MOBIDB_LITE); mobidb-lite (MOBIDB_LITE); mobidb-lite (MOBIDB_LITE); mobidb-lite (MOBIDB_LITE); IPR031248 (PANTHER); IPR001841 (PROSITE_PROFILES); cd00009 (CDD); IPR027417 (SUPERFAMILY); IP…	F:GO:0004842; F:GO:0016887	F:ubiquitin-protein transferase activity; F:ATPase activity
SPF_FS5_contig_113	[INTERPRO, BLASTED, MAPPED, GO-SLIM]	eukaryotic translation initiation factor 4H-like	1245	15	2.48234e-36	84.51	7	P:GO:0001731; F:GO:0003743; C:GO:0005844; F:GO:0033592; F:GO:0034057; F:GO:0043024; P:GO:0097010	P:formation of translation preinitiation complex; F:translation initiation factor activity; C:polysome; F:RNA strand annealing activity; F:RNA strand-exchange activity; F:ribosomal small subunit binding; P:eukaryotic translation initiation factor 4F complex assembly			IPR000504 (SMART); IPR012677 (G3DSA:3.30.70.GENE3D); IPR000504 (PFAM); mobidb-lite (MOBIDB_LITE); mobidb-lite (MOBIDB_LITE); mobidb-lite (MOBIDB_LITE); mobidb-lite (MOBIDB_LITE); mobidb-lite (MOBIDB_LITE); mobidb-lite (MOBIDB_LITE); PTHR23236 (PANTHER); PTHR23236:SF11 (PANTHER); IPR000504 (PROSITE_PROFILES); IPR034229 (CDD); IPR035979 (SUPERFAMILY)	F:GO:0003676	F:nucleic acid binding
SPF_FS5_contig_114	[INTERPRO, BLASTED, MAPPED, GO-SLIM]	nuclear factor NF-kappa-B p105 subunit-like	5594	15	9.38676e-63	59.14	7	F:GO:0003677; F:GO:0003700; F:GO:0005515; C:GO:0005634; C:GO:0005737; P:GO:0006355; P:GO:0007165	F:DNA binding; F:DNA-binding transcription factor activity; F:protein binding; C:nucleus; C:cytoplasm; P:regulation of transcription, DNA-templated; P:signal transduction			IPR000451 (PRINTS); IPR002110 (SMART); IPR002909 (SMART); IPR000488 (SMART); IPR020683 (PFAM); IPR011539 (PFAM); IPR037059 (G3DSA:2.60.40.GENE3D); IPR013783 (G3DSA:2.60.40.GENE3D); IPR036770 (G3DSA:1.25.40.GENE3D); IPR032397 (PFAM); G3DSA:1.10.533.10 (GENE3D); mobidb-lite (MOBIDB_LITE); IPR000451 (PANTHER); PTHR24169:SF22 (PANTHER); IPR002110 (PROSITE_PROFILES); IPR011539 (PROSITE_PROFILES); IPR0…	F:GO:0003677; F:GO:0003700; F:GO:0005515; C:GO:0005634; C:GO:0005737; P:GO:0006355; P:GO:0007165	F:DNA binding; F:DNA-binding transcription factor activity; F:protein binding; C:nucleus; C:cytoplasm; P:regulation of transcription, DNA-templated; P:signal transduction
SPF_FS5_contig_115	[INTERPRO, BLASTED, MAPPED, GO-SLIM]	serine proteinase stubble-like	743	15	9.07186e-48	65.78	2	F:GO:0004252; P:GO:0006508	F:serine-type endopeptidase activity; P:proteolysis			IPR001254 (SMART); G3DSA:2.40.10.10 (GENE3D); IPR001254 (PFAM); PTHR24250 (PANTHER); IPR001254 (PROSITE_PROFILES); IPR001254 (CDD); IPR009003 (SUPERFAMILY)	F:GO:0004252; P:GO:0006508	F:serine-type endopeptidase activity; P:proteolysis
SPF_FS5_contig_116	[INTERPRO, BLASTED, MAPPED, GO-SLIM]	phosphatidylinositol 4-kinase type 2-beta	2544	15	0	78.49	2	P:GO:0006629; F:GO:0016301	P:lipid metabolic process; F:kinase activity	EC:2.7.1.67	1-phosphatidylinositol 4-kinase	IPR000403 (PFAM); mobidb-lite (MOBIDB_LITE); mobidb-lite (MOBIDB_LITE); PTHR12865:SF6 (PANTHER); IPR039756 (PANTHER)	F:GO:0004430	F:1-phosphatidylinositol 4-kinase activity
SPF_FS5_contig_117	[INTERPRO, BLASTED, MAPPED, GO-SLIM]	actin, adductor muscle	1459	15	0	97.86	14	F:GO:0005198; C:GO:0005654; C:GO:0005829; C:GO:0005856; C:GO:0005886; P:GO:0007010; F:GO:0008092; F:GO:0008134; P:GO:0016192; F:GO:0019899; C:GO:0032991; F:GO:0043167; P:GO:0048870; P:GO:0055085	F:structural molecule activity; C:nucleoplasm; C:cytosol; C:cytoskeleton; C:plasma membrane; P:cytoskeleton organization; F:cytoskeletal protein binding; F:transcription factor binding; P:vesicle-mediated transport; F:enzyme binding; C:protein-containing complex; F:ion binding; P:cell motility; P:transmembrane transport			IPR004000 (PRINTS); IPR004000 (SMART); G3DSA:3.30.420.40 (GENE3D); G3DSA:3.30.420.40 (GENE3D); G3DSA:3.90.640.10 (GENE3D); IPR004000 (PFAM); PTHR11937:SF278 (PANTHER); IPR004000 (PANTHER); cd00012 (CDD); SSF53067 (SUPERFAMILY); SSF53067 (SUPERFAMILY)	no GO terms	no GO terms
SPF_FS5_contig_118	[INTERPRO, BLASTED, MAPPED, GO-SLIM]	sorting nexin-12-like	1698	15	1.71128e-82	91.5	2	F:GO:0008289; F:GO:0043167	F:lipid binding; F:ion binding			IPR001683 (SMART); IPR036871 (G3DSA:3.30.1520.GENE3D); IPR001683 (PFAM); IPR039358 (PANTHER); PTHR10555:SF145 (PANTHER); IPR001683 (PROSITE_PROFILES); cd06894 (CDD); IPR036871 (SUPERFAMILY)	F:GO:0035091	F:phosphatidylinositol binding
SPF_FS5_contig_119	[INTERPRO, BLASTED, MAPPED, GO-SLIM]	Y-box factor homolog	1356	15	2.65807e-51	90.29	1	F:GO:0003674	F:molecular_function			IPR002059 (PRINTS); IPR011129 (SMART); G3DSA:2.40.50.140 (GENE3D); IPR002059 (PFAM); mobidb-lite (MOBIDB_LITE); mobidb-lite (MOBIDB_LITE); mobidb-lite (MOBIDB_LITE); mobidb-lite (MOBIDB_LITE); PTHR11544 (PANTHER); PTHR11544:SF14 (PANTHER); IPR002059 (CDD); IPR012340 (SUPERFAMILY)	F:GO:0003676	F:nucleic acid binding
SPF_FS5_contig_120	[INTERPRO, BLASTED, MAPPED, GO-SLIM]	dnaJ homolog subfamily B member 5 isoform X2	1408	15	4.31306e-88	64.36	2	P:GO:0006457; F:GO:0051082	P:protein folding; F:unfolded protein binding			G3DSA:2.60.260.20 (GENE3D); G3DSA:2.60.260.20 (GENE3D); IPR002939 (PFAM); mobidb-lite (MOBIDB_LITE); mobidb-lite (MOBIDB_LITE); PTHR24078 (PANTHER); cd10747 (CDD); IPR008971 (SUPERFAMILY); IPR008971 (SUPERFAMILY)	P:GO:0006457; F:GO:0051082	P:protein folding; F:unfolded protein binding
SPF_FS5_contig_121	[INTERPRO, BLASTED, MAPPED, GO-SLIM]	sarcoplasmic calcium-binding proteins I, III, and IV-like	1296	15	9.69466e-65	67.6	1	F:GO:0043167	F:ion binding			G3DSA:1.10.238.10 (GENE3D); PTHR10827 (PANTHER); PTHR10827:SF46 (PANTHER); IPR002048 (PROSITE_PROFILES); IPR002048 (PROSITE_PROFILES); IPR002048 (PROSITE_PROFILES); IPR011992 (SUPERFAMILY)	F:GO:0005509	F:calcium ion binding
SPF_FS5_contig_123	[INTERPRO, BLASTED, MAPPED, GO-SLIM]	neutral ceramidase-like	2323	15	0	74.52	1	C:GO:0005575	C:cellular_component			IPR038445 (G3DSA:2.60.40.GENE3D); IPR031331 (PFAM); IPR031329 (PFAM); IPR006823 (PANTHER); PTHR12670:SF1 (PANTHER); PS51257 (PROSITE_PROFILES)	no GO terms	no GO terms
SPF_FS5_contig_125	[INTERPRO, BLASTED, MAPPED, GO-SLIM]	mammalian ependymin-related protein 1-like	481	15	7.11375e-24	63.27	3	C:GO:0005576; P:GO:0007155; F:GO:0043167	C:extracellular region; P:cell adhesion; F:ion binding			IPR001299 (PFAM); IPR001299 (PANTHER); PTHR10697:SF1 (PANTHER)	F:GO:0005509; C:GO:0005576; P:GO:0007160	F:calcium ion binding; C:extracellular region; P:cell-matrix adhesion
SPF_FS5_contig_126	[INTERPRO, BLASTED, MAPPED, GO-SLIM]	cathepsin L1-like	494	15	2.7481e-62	86.71	1	F:GO:0008233	F:peptidase activity			IPR000668 (SMART); G3DSA:3.90.70.10 (GENE3D); IPR000668 (PFAM); G3DSA:2.40.50.170 (GENE3D); PTHR12411:SF57 (PANTHER); IPR013128 (PANTHER); IPR039417 (CDD); IPR038765 (SUPERFAMILY)	P:GO:0006508; F:GO:0008234	P:proteolysis; F:cysteine-type peptidase activity
SPF_FS5_contig_127	[INTERPRO, BLASTED, MAPPED, GO-SLIM]	60S ribosomal protein L9	828	15	2.73046e-82	82.73	5	P:GO:0002181; F:GO:0003735; P:GO:0008340; F:GO:0019843; C:GO:0022625	P:cytoplasmic translation; F:structural constituent of ribosome; P:determination of adult lifespan; F:rRNA binding; C:cytosolic large ribosomal subunit			IPR000702 (PIRSF); IPR036789 (G3DSA:3.90.930.GENE3D); IPR020040 (PFAM); IPR036789 (G3DSA:3.90.930.GENE3D); PTHR11655:SF16 (PANTHER); IPR000702 (PANTHER); IPR036789 (SUPERFAMILY); IPR036789 (SUPERFAMILY)	F:GO:0003735; C:GO:0005840; P:GO:0006412; F:GO:0019843	F:structural constituent of ribosome; C:ribosome; P:translation; F:rRNA binding
SPF_FS5_contig_131	[INTERPRO, BLASTED, MAPPED, GO-SLIM]	tumor protein p53-inducible nuclear protein 2	1359	15	7.12172e-12	47.47	1	P:GO:0008150	P:biological_process			IPR029431 (PFAM); mobidb-lite (MOBIDB_LITE); IPR029431 (PANTHER); PD485813 (PRODOM)	no GO terms	no GO terms
SPF_FS5_contig_132	[BLASTED, MAPPED, ANNOTATED]	E3 ubiquitin-protein ligase SH3RF1 isoform X1	3336	15	5.41715e-61	60.23	1	F:GO:0046872	F:metal ion binding
SPF_FS5_contig_133	[INTERPRO, BLASTED, MAPPED, GO-SLIM]	innexin unc-9 isoform X6	2427	15	5.95913e-117	65.25	1	C:GO:0005575	C:cellular_component			IPR000990 (PRINTS); IPR000990 (PFAM); IPR000990 (PANTHER); IPR000990 (PROSITE_PROFILES)	no GO terms	no GO terms
SPF_FS5_contig_134	[INTERPRO, BLASTED, MAPPED, GO-SLIM]	Phosphate carrier protein, mitochondrial	1665	15	3.93165e-163	86.46	2	C:GO:0005575; F:GO:0022857	C:cellular_component; F:transmembrane transporter activity			IPR018108 (PFAM); IPR023395 (G3DSA:1.50.40.GENE3D); mobidb-lite (MOBIDB_LITE); IPR040062 (PANTHER); PTHR24089:SF638 (PANTHER); IPR018108 (PROSITE_PROFILES); IPR018108 (PROSITE_PROFILES); IPR018108 (PROSITE_PROFILES); IPR023395 (SUPERFAMILY)	F:GO:0022857	F:transmembrane transporter activity
SPF_FS5_contig_135	[BLASTED, MAPPED, ANNOTATED]	uncharacterized protein LOC106179632	1150	15	6.29444e-28	48.53	1	C:GO:0016020	C:membrane
SPF_FS5_contig_136	[INTERPRO, BLASTED, MAPPED, GO-SLIM]	selenoprotein W-like	808	15	3.29756e-25	74.37	2	C:GO:0005829; P:GO:0008150	C:cytosol; P:biological_process			IPR011893 (TIGRFAM); G3DSA:3.40.30.10 (GENE3D); PTHR15124 (PANTHER); PTHR15124:SF18 (PANTHER)	no GO terms	no GO terms
SPF_FS5_contig_137	[INTERPRO, BLASTED, MAPPED, GO-SLIM]	hypothetical protein LOTGIDRAFT_232951	462	5	1.82331e-07	55.17	1	C:GO:0005575	C:cellular_component			no IPS match	no IPS match	no IPS match
SPF_FS5_contig_139	[INTERPRO, BLASTED, MAPPED, GO-SLIM]	Chorion peroxidase	844	15	4.82252e-68	63.11	2	P:GO:0006950; F:GO:0016491	P:response to stress; F:oxidoreductase activity	EC:1.11.1.7	Peroxidase	IPR019791 (PRINTS); IPR019791 (PFAM); IPR037120 (G3DSA:1.10.640.GENE3D); PTHR11475 (PANTHER); PTHR11475:SF82 (PANTHER); IPR019791 (PROSITE_PROFILES); IPR010255 (SUPERFAMILY)	F:GO:0004601; P:GO:0006979; F:GO:0020037; P:GO:0055114	F:peroxidase activity; P:response to oxidative stress; F:heme binding; P:oxidation-reduction process
SPF_FS5_contig_141	[BLASTED, MAPPED, ANNOTATED]	plexin-A2 isoform X1	7044	15	0	51.92	2	P:GO:0007165; C:GO:0016020	P:signal transduction; C:membrane
SPF_FS5_contig_144	[INTERPRO, BLASTED, MAPPED, GO-SLIM]	ATP synthase lipid-binding protein, mitochondrial	787	15	4.67856e-19	75.11	5	C:GO:0005739; F:GO:0015078; P:GO:0015986; C:GO:0045263; P:GO:1902600	C:mitochondrion; F:proton transmembrane transporter activity; P:ATP synthesis coupled proton transport; C:proton-transporting ATP synthase complex, coupling factor F(o); P:proton transmembrane transport			IPR000454 (PRINTS); IPR038662 (G3DSA:1.20.20.GENE3D); IPR002379 (PFAM); IPR000454 (PANTHER); PTHR10031:SF21 (PANTHER); IPR000454 (HAMAP); IPR035921 (SUPERFAMILY)	F:GO:0015078; P:GO:0015986; C:GO:0033177; C:GO:0045263; P:GO:1902600	F:proton transmembrane transporter activity; P:ATP synthesis coupled proton transport; C:proton-transporting two-sector ATPase complex, proton-transporting domain; C:proton-transporting ATP synthase complex, coupling factor F(o); P:proton transmembrane transport
SPF_FS5_contig_147	[INTERPRO, BLASTED, MAPPED, GO-SLIM]	hydroxyacid oxidase 1	941	15	2.72174e-97	69.07	4	P:GO:0001561; C:GO:0005777; F:GO:0008891; F:GO:0010181	P:fatty acid alpha-oxidation; C:peroxisome; F:glycolate oxidase activity; F:FMN binding	EC:1.1.3.15	(S)-2-hydroxy-acid oxidase	IPR000262 (PFAM); IPR013785 (G3DSA:3.20.20.GENE3D); mobidb-lite (MOBIDB_LITE); PTHR10578 (PANTHER); IPR037396 (PROSITE_PROFILES); IPR012133 (CDD); SSF51395 (SUPERFAMILY)	F:GO:0003824; F:GO:0010181; F:GO:0016491; P:GO:0055114	F:catalytic activity; F:FMN binding; F:oxidoreductase activity; P:oxidation-reduction process
SPF_FS5_contig_148	[INTERPRO, BLASTED, MAPPED, GO-SLIM]	Hydroxyacid oxidase 1	395	15	8.35984e-32	77.76	1	F:GO:0016491	F:oxidoreductase activity			IPR013785 (G3DSA:3.20.20.GENE3D); IPR000262 (PFAM); PTHR10578 (PANTHER); PTHR10578:SF69 (PANTHER); IPR037396 (PROSITE_PROFILES); SSF51395 (SUPERFAMILY)	F:GO:0003824; F:GO:0016491	F:catalytic activity; F:oxidoreductase activity
SPF_FS5_contig_149	[INTERPRO, BLASTED, MAPPED, GO-SLIM]	Receptor-interacting serine/threonine-protein kinase 1	1866	15	2.09938e-36	51.12	3	F:GO:0004672; F:GO:0005524; P:GO:0006468	F:protein kinase activity; F:ATP binding; P:protein phosphorylation			IPR000719 (SMART); PIRSF000654 (PIRSF); G3DSA:1.10.510.10 (GENE3D); IPR001245 (PFAM); PTHR45116 (PANTHER); IPR000719 (PROSITE_PROFILES); IPR011009 (SUPERFAMILY)	F:GO:0004672; F:GO:0005524; P:GO:0006468	F:protein kinase activity; F:ATP binding; P:protein phosphorylation
SPF_FS5_contig_150	[INTERPRO, BLASTED, MAPPED, GO-SLIM]	UPF0536 protein C12orf66 homolog	1809	15	3.2277e-97	57.44	3	P:GO:0006950; P:GO:0007165; C:GO:0032991	P:response to stress; P:signal transduction; C:protein-containing complex			IPR038060 (G3DSA:1.10.3450.GENE3D); IPR018544 (PFAM); IPR018544 (PANTHER); SSF160651 (SUPERFAMILY); IPR038060 (SUPERFAMILY)	no GO terms	no GO terms
SPF_FS5_contig_151	[BLASTED, MAPPED, ANNOTATED]	disrupted in renal carcinoma protein 2-like	2945	15	2.8713e-72	52.62	2	C:GO:0016020; C:GO:0043231	C:membrane; C:intracellular membrane-bounded organelle
SPF_FS5_contig_152	[INTERPRO, BLASTED, MAPPED, GO-SLIM]	mitochondrial ATP synthase subunit b precursor	1194	15	7.17134e-82	66.4	3	C:GO:0000276; F:GO:0015078; P:GO:0015986	C:mitochondrial proton-transporting ATP synthase complex, coupling factor F(o); F:proton transmembrane transporter activity; P:ATP synthesis coupled proton transport			IPR008688 (PFAM); IPR013837 (PANTHER); SSF161060 (SUPERFAMILY)	C:GO:0000276; F:GO:0015078; P:GO:0015986	C:mitochondrial proton-transporting ATP synthase complex, coupling factor F(o); F:proton transmembrane transporter activity; P:ATP synthesis coupled proton transport
SPF_FS5_contig_153	[INTERPRO, BLASTED, MAPPED, GO-SLIM]	E3 ubiquitin-protein ligase RNF13	1311	15	5.16567e-47	55.07	3	F:GO:0003674; C:GO:0005622; C:GO:0043226	F:molecular_function; C:intracellular; C:organelle			IPR001841 (SMART); G3DSA:3.50.30.30 (GENE3D); IPR003137 (PFAM); IPR013083 (G3DSA:3.30.40.GENE3D); IPR001841 (PFAM); mobidb-lite (MOBIDB_LITE); PTHR22765 (PANTHER); PTHR22765:SF63 (PANTHER); IPR001841 (PROSITE_PROFILES); cd16665 (CDD); SSF52025 (SUPERFAMILY); SSF57850 (SUPERFAMILY)	no GO terms	no GO terms
SPF_FS5_contig_154	[INTERPRO, BLASTED, MAPPED, GO-SLIM]	MAP kinase-interacting serine/threonine-protein kinase 1-like	2141	15	7.33001e-155	72	3	F:GO:0004672; F:GO:0005524; P:GO:0006468	F:protein kinase activity; F:ATP binding; P:protein phosphorylation			IPR000719 (SMART); G3DSA:1.10.510.10 (GENE3D); IPR000719 (PFAM); G3DSA:3.30.200.20 (GENE3D); mobidb-lite (MOBIDB_LITE); mobidb-lite (MOBIDB_LITE); mobidb-lite (MOBIDB_LITE); mobidb-lite (MOBIDB_LITE); PTHR24349 (PANTHER); PTHR24349:SF114 (PANTHER); IPR000719 (PROSITE_PROFILES); IPR011009 (SUPERFAMILY)	F:GO:0004672; F:GO:0005524; P:GO:0006468	F:protein kinase activity; F:ATP binding; P:protein phosphorylation
SPF_FS5_contig_155	[INTERPRO, BLASTED, MAPPED, GO-SLIM]	4-hydroxyphenylpyruvate dioxygenase	1766	15	0	84.95	8	F:GO:0003678; F:GO:0003868; F:GO:0005524; P:GO:0006260; P:GO:0009072; P:GO:0032508; F:GO:0046872; P:GO:0055114	F:DNA helicase activity; F:4-hydroxyphenylpyruvate dioxygenase activity; F:ATP binding; P:DNA replication; P:aromatic amino acid family metabolic process; P:DNA duplex unwinding; F:metal ion binding; P:oxidation-reduction process	EC:1.13.11; EC:1.13.11.27; EC:3.6.1.15	Acting on single donors with incorporation of molecular oxygen (oxygenases). The oxygen incorporated need not be derived from O(2); 4-hydroxyphenylpyruvate dioxygenase; Nucleoside-triphosphate phosphatase	IPR005956 (PIRSF); PF13669 (PFAM); IPR005956 (TIGRFAM); IPR004360 (PFAM); IPR029068 (G3DSA:3.10.180.GENE3D); IPR029068 (G3DSA:3.10.180.GENE3D); IPR005956 (PANTHER); PTHR11959:SF1 (PANTHER); IPR037523 (PROSITE_PROFILES); IPR037523 (PROSITE_PROFILES); cd08342 (CDD); cd07250 (CDD); IPR029068 (SUPERFAMILY)	F:GO:0003868; P:GO:0009072; F:GO:0016701; P:GO:0055114	F:4-hydroxyphenylpyruvate dioxygenase activity; P:aromatic amino acid family metabolic process; F:oxidoreductase activity, acting on single donors with incorporation of molecular oxygen; P:oxidation-reduction process
SPF_FS5_contig_157	[INTERPRO, BLASTED, MAPPED, GO-SLIM]	retinal dehydrogenase 2-like	1698	15	0	81.83	2	F:GO:0004029; P:GO:0055114	F:aldehyde dehydrogenase (NAD+) activity; P:oxidation-reduction process	EC:1.2.1.3	Aldehyde dehydrogenase (NAD(+))	IPR016163 (G3DSA:3.40.309.GENE3D); IPR015590 (PFAM); IPR016162 (G3DSA:3.40.605.GENE3D); PTHR11699:SF265 (PANTHER); PTHR11699 (PANTHER); IPR016161 (SUPERFAMILY)	F:GO:0016491; F:GO:0016620; P:GO:0055114	F:oxidoreductase activity; F:oxidoreductase activity, acting on the aldehyde or oxo group of donors, NAD or NADP as acceptor; P:oxidation-reduction process
SPF_FS5_contig_158	[INTERPRO, BLASTED, MAPPED, GO-SLIM]	EGF domain-specific O-linked N-acetylglucosamine transferase	1240	5	3.84011e-12	53.79	2	C:GO:0005575; F:GO:0043167	C:cellular_component; F:ion binding			IPR028011 (PFAM); PTHR14880 (PANTHER)	no GO terms	no GO terms
SPF_FS5_contig_159	[INTERPRO, BLASTED, MAPPED, GO-SLIM]	pancreatic alpha-amylase	2200	15	0	63.73	3	P:GO:0005975; F:GO:0016798; F:GO:0043169	P:carbohydrate metabolic process; F:hydrolase activity, acting on glycosyl bonds; F:cation binding			IPR006046 (PRINTS); IPR006047 (SMART); IPR031319 (SMART); IPR006047 (PFAM); G3DSA:3.20.20.80 (GENE3D); IPR013780 (G3DSA:2.60.40.GENE3D); IPR006048 (PFAM); mobidb-lite (MOBIDB_LITE); mobidb-lite (MOBIDB_LITE); PTHR43447:SF7 (PANTHER); PTHR43447 (PANTHER); cd11317 (CDD); IPR017853 (SUPERFAMILY); SSF51011 (SUPERFAMILY)	F:GO:0003824; P:GO:0005975; F:GO:0043169	F:catalytic activity; P:carbohydrate metabolic process; F:cation binding
SPF_FS5_contig_160	[INTERPRO, BLASTED, MAPPED, GO-SLIM]	eukaryotic translation initiation factor 3 subunit A	3371	15	0	79.38	4	C:GO:0005737; F:GO:0008135; P:GO:0022618; C:GO:0032991	C:cytoplasm; F:translation factor activity, RNA binding; P:ribonucleoprotein complex assembly; C:protein-containing complex			SM00753 (SMART); IPR000717 (SMART); IPR000717 (PFAM); G3DSA:1.25.40.860 (GENE3D); G3DSA:4.10.860.10 (GENE3D); mobidb-lite (MOBIDB_LITE); mobidb-lite (MOBIDB_LITE); mobidb-lite (MOBIDB_LITE); mobidb-lite (MOBIDB_LITE); IPR027512 (PANTHER); IPR027512 (HAMAP); IPR000717 (PROSITE_PROFILES)	C:GO:0005852	C:eukaryotic translation initiation factor 3 complex
SPF_FS5_contig_163	[INTERPRO, BLASTED, MAPPED, GO-SLIM]	Myosin alkali light chain 1	638	15	2.45296e-77	84.05	1	F:GO:0043167	F:ion binding			IPR002048 (SMART); IPR002048 (PFAM); G3DSA:1.10.238.10 (GENE3D); G3DSA:1.10.238.10 (GENE3D); PTHR23048 (PANTHER); IPR029655 (PTHR23048:PANTHER); IPR002048 (PROSITE_PROFILES); IPR002048 (PROSITE_PROFILES); IPR002048 (CDD); IPR011992 (SUPERFAMILY)	F:GO:0005509	F:calcium ion binding
SPF_FS5_contig_164	[INTERPRO, BLASTED, MAPPED, GO-SLIM]	glutathione S-transferase	353	15	4.0534e-15	73.49	4	F:GO:0004364; F:GO:0005515; P:GO:0006749; C:GO:0043292	F:glutathione transferase activity; F:protein binding; P:glutathione metabolic process; C:contractile fiber	EC:2.5.1.18	Glutathione transferase	G3DSA:1.20.1050.130 (GENE3D); IPR004045 (PROSITE_PROFILES)	F:GO:0005515	F:protein binding
SPF_FS5_contig_166	[INTERPRO, BLASTED, MAPPED, GO-SLIM]	DNA-(apurinic or apyrimidinic site) lyase-like	5123	15	7.01873e-128	79.36	11	F:GO:0003677; F:GO:0003906; C:GO:0005634; C:GO:0005739; P:GO:0006284; F:GO:0008081; F:GO:0008270; F:GO:0008833; F:GO:0016829; P:GO:0032006; P:GO:0090305	F:DNA binding; F:DNA-(apurinic or apyrimidinic site) endonuclease activity; C:nucleus; C:mitochondrion; P:base-excision repair; F:phosphoric diester hydrolase activity; F:zinc ion binding; F:deoxyribonuclease IV (phage-T4-induced) activity; F:lyase activity; P:regulation of TOR signaling; P:nucleic acid phosphodiester bond hydrolysis	EC:3.1.30; EC:3.1.21.2; EC:3.1.21	Acting on ester bonds; Deoxyribonuclease IV; Acting on ester bonds	IPR001719 (SMART); G3DSA:3.20.20.150 (GENE3D); IPR001719 (TIGRFAM); IPR013022 (PFAM); mobidb-lite (MOBIDB_LITE); IPR001719 (PANTHER); IPR001719 (PROSITE_PROFILES); IPR001719 (HAMAP); IPR001719 (CDD); IPR036237 (SUPERFAMILY)	F:GO:0003677; P:GO:0006281; F:GO:0008270	F:DNA binding; P:DNA repair; F:zinc ion binding
SPF_FS5_contig_168	[INTERPRO, BLASTED, MAPPED, GO-SLIM]	Cathepsin L	1408	15	6.47563e-159	78.88	1	F:GO:0008233	F:peptidase activity			IPR000668 (PRINTS); IPR000668 (SMART); IPR013201 (SMART); IPR013201 (PFAM); IPR000668 (PFAM); G3DSA:3.90.70.10 (GENE3D); IPR013128 (PANTHER); PTHR12411:SF57 (PANTHER); IPR039417 (CDD); IPR038765 (SUPERFAMILY)	P:GO:0006508; F:GO:0008234	P:proteolysis; F:cysteine-type peptidase activity
SPF_FS5_contig_170	[INTERPRO, BLASTED, MAPPED, GO-SLIM]	major facilitator superfamily domain-containing protein 7-like isoform X1	1916	15	6.79905e-113	64.57	2	C:GO:0005575; P:GO:0055085	C:cellular_component; P:transmembrane transport			G3DSA:1.20.1250.20 (GENE3D); IPR011701 (PFAM); G3DSA:1.20.1250.20 (GENE3D); mobidb-lite (MOBIDB_LITE); PTHR10924 (PANTHER); IPR020846 (PROSITE_PROFILES); IPR020846 (CDD); IPR036259 (SUPERFAMILY)	C:GO:0016021; P:GO:0055085	C:integral component of membrane; P:transmembrane transport
SPF_FS5_contig_171	[INTERPRO, BLASTED, MAPPED, GO-SLIM]	dynein gamma chain, flagellar outer arm-like	8083	15	0	68.67	4	C:GO:0005856; P:GO:0008150; C:GO:0032991; F:GO:0043167	C:cytoskeleton; P:biological_process; C:protein-containing complex; F:ion binding	EC:3.6.1.15	Nucleoside-triphosphate phosphatase	IPR003593 (SMART); G3DSA:3.40.50.300 (GENE3D); IPR041658 (PFAM); IPR024317 (PFAM); IPR041466 (PFAM); G3DSA:3.40.50.300 (GENE3D); G3DSA:1.20.920.30 (GENE3D); G3DSA:1.20.920.20 (GENE3D); G3DSA:1.10.8.720 (GENE3D); PF12775 (PFAM); G3DSA:3.40.50.11510 (GENE3D); IPR041228 (PFAM); IPR004273 (PFAM); IPR035706 (PFAM); G3DSA:1.10.472.130 (GENE3D); G3DSA:1.20.1270.280 (GENE3D); G3DSA:3.40.50.300 (GENE3D); …	F:GO:0003777; P:GO:0007018; C:GO:0030286	F:microtubule motor activity; P:microtubule-based movement; C:dynein complex
SPF_FS5_contig_172	[INTERPRO, BLASTED, MAPPED, GO-SLIM]	uncharacterized protein LOC106170172	3690	15	0	68.81	1	C:GO:0005575	C:cellular_component			mobidb-lite (MOBIDB_LITE); mobidb-lite (MOBIDB_LITE); mobidb-lite (MOBIDB_LITE); mobidb-lite (MOBIDB_LITE); mobidb-lite (MOBIDB_LITE); mobidb-lite (MOBIDB_LITE); IPR031390 (PANTHER)	no GO terms	no GO terms
SPF_FS5_contig_173	[INTERPRO, BLASTED, MAPPED, GO-SLIM]	CCR4-NOT transcription complex subunit 11-like isoform X2	3172	15	0	80.05	2	C:GO:0005622; C:GO:0032991	C:intracellular; C:protein-containing complex			IPR019312 (PFAM); IPR019312 (PANTHER)	C:GO:0030014	C:CCR4-NOT complex
SPF_FS5_contig_174	[INTERPRO, BLASTED, MAPPED, GO-SLIM]	CD109 antigen-like isoform X2	1641	15	3.77296e-35	51.82	2	F:GO:0004866; C:GO:0005576	F:endopeptidase inhibitor activity; C:extracellular region			G3DSA:2.60.40.1930 (GENE3D); IPR002890 (PFAM); IPR041555 (PFAM); G3DSA:2.60.40.1940 (GENE3D); PTHR11412 (PANTHER)	F:GO:0004866	F:endopeptidase inhibitor activity
SPF_FS5_contig_175	[INTERPRO, BLASTED, MAPPED, GO-SLIM]	epidermal growth factor receptor substrate 15-like 1 isoform X4	2439	15	1.08483e-151	62.73	3	F:GO:0005509; F:GO:0005515; P:GO:0042059	F:calcium ion binding; F:protein binding; P:negative regulation of epidermal growth factor receptor signaling pathway			IPR002048 (SMART); IPR000261 (SMART); G3DSA:1.10.238.10 (GENE3D); G3DSA:1.10.238.10 (GENE3D); IPR000261 (PFAM); mobidb-lite (MOBIDB_LITE); mobidb-lite (MOBIDB_LITE); mobidb-lite (MOBIDB_LITE); mobidb-lite (MOBIDB_LITE); mobidb-lite (MOBIDB_LITE); mobidb-lite (MOBIDB_LITE); PTHR11216 (PANTHER); PTHR11216:SF69 (PANTHER); IPR000261 (PROSITE_PROFILES); IPR002048 (PROSITE_PROFILES); IPR002048 (PROSITE…	F:GO:0005509; F:GO:0005515	F:calcium ion binding; F:protein binding
SPF_FS5_contig_176	[INTERPRO, BLASTED, MAPPED, GO-SLIM]	alpha-L-fucosidase-like isoform X1	1821	15	0	77.49	4	F:GO:0004560; C:GO:0005764; P:GO:0006004; P:GO:0016139	F:alpha-L-fucosidase activity; C:lysosome; P:fucose metabolic process; P:glycoside catabolic process	EC:3.2.1.51	Alpha-L-fucosidase	IPR016286 (PRINTS); IPR000933 (SMART); IPR031919 (PFAM); IPR016286 (PIRSF); IPR013780 (G3DSA:2.60.40.GENE3D); G3DSA:3.20.20.80 (GENE3D); IPR000933 (PFAM); PTHR10030:SF24 (PANTHER); IPR000933 (PANTHER); IPR017853 (SUPERFAMILY)	F:GO:0004560; P:GO:0005975; P:GO:0006004	F:alpha-L-fucosidase activity; P:carbohydrate metabolic process; P:fucose metabolic process
SPF_FS5_contig_177	[INTERPRO, BLASTED, MAPPED, GO-SLIM]	digestive cysteine proteinase 1	2308	15	0	68.18	4	F:GO:0004197; C:GO:0005615; C:GO:0005764; P:GO:0051603	F:cysteine-type endopeptidase activity; C:extracellular space; C:lysosome; P:proteolysis involved in cellular protein catabolic process	EC:3.4.22	Acting on peptide bonds (peptidases)	IPR000668 (PRINTS); IPR000668 (SMART); IPR013201 (SMART); G3DSA:3.90.70.10 (GENE3D); IPR000668 (PFAM); IPR013201 (PFAM); mobidb-lite (MOBIDB_LITE); IPR013128 (PANTHER); PTHR12411:SF374 (PANTHER); IPR039417 (CDD); IPR038765 (SUPERFAMILY)	P:GO:0006508; F:GO:0008234	P:proteolysis; F:cysteine-type peptidase activity
SPF_FS5_contig_181	[INTERPRO, BLASTED, MAPPED, GO-SLIM]	E3 ubiquitin-protein ligase ARI4	3073	15	1.96506e-32	47.49	3	F:GO:0004842; P:GO:0016567; F:GO:0046872	F:ubiquitin-protein transferase activity; P:protein ubiquitination; F:metal ion binding			IPR002867 (SMART); IPR002867 (PFAM); G3DSA:1.20.120.1750 (GENE3D); IPR013083 (G3DSA:3.30.40.GENE3D); IPR018957 (PFAM); mobidb-lite (MOBIDB_LITE); mobidb-lite (MOBIDB_LITE); mobidb-lite (MOBIDB_LITE); mobidb-lite (MOBIDB_LITE); IPR031127 (PANTHER); IPR003616 (PROSITE_PROFILES); IPR001841 (PROSITE_PROFILES); SSF57850 (SUPERFAMILY); SSF57850 (SUPERFAMILY); SSF57850 (SUPERFAMILY)	F:GO:0004842; P:GO:0016567; F:GO:0046872	F:ubiquitin-protein transferase activity; P:protein ubiquitination; F:metal ion binding
SPF_FS5_contig_182	[INTERPRO, BLASTED, MAPPED, GO-SLIM]	ubiquitin-protein ligase E3B	3792	15	0	67.85	3	F:GO:0004842; F:GO:0005515; P:GO:0016567	F:ubiquitin-protein transferase activity; F:protein binding; P:protein ubiquitination			IPR000048 (SMART); IPR000569 (SMART); IPR000048 (PFAM); G3DSA:3.30.2160.10 (GENE3D); IPR000569 (PFAM); G3DSA:3.30.2410.10 (GENE3D); G3DSA:3.90.1750.10 (GENE3D); mobidb-lite (MOBIDB_LITE); PTHR11254:SF352 (PANTHER); PTHR11254 (PANTHER); IPR000569 (PROSITE_PROFILES); IPR000048 (PROSITE_PROFILES); IPR000569 (CDD); IPR035983 (SUPERFAMILY)	F:GO:0004842; F:GO:0005515	F:ubiquitin-protein transferase activity; F:protein binding
SPF_FS5_contig_183	[INTERPRO, BLASTED, MAPPED, GO-SLIM]	60S ribosomal protein L28	640	15	2.07057e-55	84.17	12	P:GO:0000184; F:GO:0003723; F:GO:0003735; F:GO:0005515; P:GO:0006413; P:GO:0006614; P:GO:0019083; C:GO:0022625; C:GO:0030425; C:GO:0036464; P:GO:0043009; C:GO:0044297	P:nuclear-transcribed mRNA catabolic process, nonsense-mediated decay; F:RNA binding; F:structural constituent of ribosome; F:protein binding; P:translational initiation; P:SRP-dependent cotranslational protein targeting to membrane; P:viral transcription; C:cytosolic large ribosomal subunit; C:dendrite; C:cytoplasmic ribonucleoprotein granule; P:chordate embryonic development; C:cell body			IPR029004 (PFAM); G3DSA:3.30.390.110 (GENE3D); PTHR10544:SF0 (PANTHER); IPR002672 (PANTHER)	F:GO:0003735; C:GO:0005622; C:GO:0005840; P:GO:0006412	F:structural constituent of ribosome; C:intracellular; C:ribosome; P:translation
SPF_FS5_contig_184	[INTERPRO, BLASTED, MAPPED, GO-SLIM]	aldehyde dehydrogenase, mitochondrial	3753	15	0	84.18	6	F:GO:0004029; C:GO:0005759; P:GO:0006068; F:GO:0043878; F:GO:0051287; P:GO:0055114	F:aldehyde dehydrogenase (NAD+) activity; C:mitochondrial matrix; P:ethanol catabolic process; F:glyceraldehyde-3-phosphate dehydrogenase (NAD+) (non-phosphorylating) activity; F:NAD binding; P:oxidation-reduction process	EC:1.2.1.3	Aldehyde dehydrogenase (NAD(+))	IPR015590 (PFAM); IPR016163 (G3DSA:3.40.309.GENE3D); IPR016162 (G3DSA:3.40.605.GENE3D); PTHR11699:SF265 (PANTHER); PTHR11699 (PANTHER); cd07141 (CDD); IPR016161 (SUPERFAMILY)	F:GO:0016491; F:GO:0016620; P:GO:0055114	F:oxidoreductase activity; F:oxidoreductase activity, acting on the aldehyde or oxo group of donors, NAD or NADP as acceptor; P:oxidation-reduction process
SPF_FS5_contig_185	[INTERPRO, BLASTED, MAPPED, GO-SLIM]	transformer-2 protein homolog alpha-like isoform X1	2399	15	2.23313e-51	92.83	1	F:GO:0003723	F:RNA binding			IPR000504 (SMART); IPR012677 (G3DSA:3.30.70.GENE3D); IPR000504 (PFAM); mobidb-lite (MOBIDB_LITE); mobidb-lite (MOBIDB_LITE); mobidb-lite (MOBIDB_LITE); mobidb-lite (MOBIDB_LITE); mobidb-lite (MOBIDB_LITE); mobidb-lite (MOBIDB_LITE); PTHR15241 (PANTHER); PTHR15241:SF1 (PANTHER); IPR000504 (PROSITE_PROFILES); cd12363 (CDD); IPR035979 (SUPERFAMILY)	F:GO:0003676	F:nucleic acid binding
SPF_FS5_contig_186	[BLASTED, MAPPED, ANNOTATED]	transcription factor 7-like 2 isoform X1	2758	15	1.19717e-86	59.43	3	F:GO:0003677; C:GO:0005634; P:GO:0016055	F:DNA binding; C:nucleus; P:Wnt signaling pathway
SPF_FS5_contig_187	[INTERPRO, BLASTED, MAPPED, GO-SLIM]	40S ribosomal protein S3	2363	15	8.26956e-139	92.43	16	F:GO:0003723; F:GO:0003735; C:GO:0005730; C:GO:0005743; C:GO:0005819; P:GO:0006417; P:GO:0007049; F:GO:0008534; C:GO:0022627; P:GO:0030218; F:GO:0032357; P:GO:0043009; P:GO:0045739; P:GO:0051301; F:GO:0140078; P:GO:2001235	F:RNA binding; F:structural constituent of ribosome; C:nucleolus; C:mitochondrial inner membrane; C:spindle; P:regulation of translation; P:cell cycle; F:oxidized purine nucleobase lesion DNA N-glycosylase activity; C:cytosolic small ribosomal subunit; P:erythrocyte differentiation; F:oxidized purine DNA binding; P:chordate embryonic development; P:positive regulation of DNA repair; P:cell divisi…	EC:4.2.99.18; EC:3.2.2.23	DNA-(apurinic or apyrimidinic site) lyase; DNA-formamidopyrimidine glycosylase	IPR036419 (G3DSA:3.30.1140.GENE3D); IPR004044 (PFAM); IPR001351 (PFAM); IPR005703 (TIGRFAM); IPR015946 (G3DSA:3.30.300.GENE3D); mobidb-lite (MOBIDB_LITE); PTHR11760:SF20 (PANTHER); PTHR11760 (PANTHER); IPR004044 (PROSITE_PROFILES); cd02413 (CDD); IPR009019 (SUPERFAMILY); IPR036419 (SUPERFAMILY)	F:GO:0003723; F:GO:0003735; C:GO:0005840; P:GO:0006412; C:GO:0015935	F:RNA binding; F:structural constituent of ribosome; C:ribosome; P:translation; C:small ribosomal subunit
SPF_FS5_contig_188	[BLASTED, MAPPED, ANNOTATED]	insoluble matrix shell protein 5	459	15	1.573e-12	52.52	1	F:GO:0005509	F:calcium ion binding
SPF_FS5_contig_190	[INTERPRO, BLASTED, MAPPED, GO-SLIM]	protein BTG2	1308	15	8.96497e-34	61.86	8	F:GO:0003700; C:GO:0005622; P:GO:0008219; P:GO:0008283; P:GO:0009058; P:GO:0030154; P:GO:0034641; P:GO:0048856	F:DNA-binding transcription factor activity; C:intracellular; P:cell death; P:cell population proliferation; P:biosynthetic process; P:cell differentiation; P:cellular nitrogen compound metabolic process; P:anatomical structure development			IPR002087 (PRINTS); IPR002087 (SMART); IPR036054 (G3DSA:1.20.120.GENE3D); IPR002087 (PFAM); mobidb-lite (MOBIDB_LITE); PTHR22978 (PANTHER); IPR036054 (SUPERFAMILY)	no GO terms	no GO terms
SPF_FS5_contig_191	[INTERPRO, BLASTED, MAPPED, GO-SLIM]	long-chain-fatty-acid--CoA ligase 1-like	2870	15	0	70.98	2	F:GO:0003824; C:GO:0016020	F:catalytic activity; C:membrane			IPR000873 (PFAM); G3DSA:3.40.50.12780 (GENE3D); IPR025110 (PFAM); G3DSA:3.40.50.12780 (GENE3D); PTHR43272 (PANTHER); PTHR43272:SF28 (PANTHER); cd05927 (CDD); SSF56801 (SUPERFAMILY)	F:GO:0003824	F:catalytic activity
SPF_FS5_contig_192	[INTERPRO, BLASTED, MAPPED, GO-SLIM]	myosin heavy chain, striated muscle-like	1442	15	0	84.5	4	C:GO:0005856; F:GO:0008092; C:GO:0032991; F:GO:0043167	C:cytoskeleton; F:cytoskeletal protein binding; C:protein-containing complex; F:ion binding	EC:3.6.1.15	Nucleoside-triphosphate phosphatase	IPR001609 (PRINTS); IPR001609 (SMART); IPR036961 (G3DSA:3.40.850.GENE3D); IPR001609 (PFAM); IPR004009 (PFAM); IPR008989 (G3DSA:2.30.30.GENE3D); G3DSA:1.20.120.720 (GENE3D); PTHR13140 (PANTHER); PTHR13140:SF344 (PANTHER); IPR004009 (PROSITE_PROFILES); IPR001609 (PROSITE_PROFILES); IPR027417 (SUPERFAMILY)	F:GO:0003774; F:GO:0005524; C:GO:0016459; F:GO:0051015	F:motor activity; F:ATP binding; C:myosin complex; F:actin filament binding
SPF_FS5_contig_193	[INTERPRO, BLASTED, MAPPED, GO-SLIM]	myosin heavy chain, striated muscle-like	1387	15	0	84.01	4	C:GO:0005856; F:GO:0008092; C:GO:0032991; F:GO:0043167	C:cytoskeleton; F:cytoskeletal protein binding; C:protein-containing complex; F:ion binding	EC:3.6.1.15	Nucleoside-triphosphate phosphatase	IPR001609 (PRINTS); IPR001609 (SMART); IPR004009 (PFAM); IPR036961 (G3DSA:3.40.850.GENE3D); IPR008989 (G3DSA:2.30.30.GENE3D); IPR001609 (PFAM); G3DSA:1.20.120.720 (GENE3D); PTHR13140 (PANTHER); PTHR13140:SF344 (PANTHER); IPR001609 (PROSITE_PROFILES); IPR004009 (PROSITE_PROFILES); IPR027417 (SUPERFAMILY)	F:GO:0003774; F:GO:0005524; C:GO:0016459; F:GO:0051015	F:motor activity; F:ATP binding; C:myosin complex; F:actin filament binding
SPF_FS5_contig_194	[INTERPRO, BLASTED, MAPPED, GO-SLIM]	inositol monophosphatase 3-like	1656	15	1.85943e-77	59.86	3	F:GO:0008254; C:GO:0016020; P:GO:0046854	F:3'-nucleotidase activity; C:membrane; P:phosphatidylinositol phosphorylation	EC:3.1.3.6; EC:3.1.3.31	3'-nucleotidase; Nucleotidase	IPR000760 (PRINTS); G3DSA:3.40.190.80 (GENE3D); IPR000760 (PFAM); G3DSA:3.30.540.10 (GENE3D); PTHR43028 (PANTHER); PTHR43028:SF4 (PANTHER); SSF56655 (SUPERFAMILY)	P:GO:0046854	P:phosphatidylinositol phosphorylation
SPF_FS5_contig_195	[INTERPRO, BLASTED, MAPPED, GO-SLIM]	40S ribosomal protein S9	824	15	3.06411e-109	95.03	4	F:GO:0003735; F:GO:0019843; C:GO:0022627; P:GO:0045903	F:structural constituent of ribosome; F:rRNA binding; C:cytosolic small ribosomal subunit; P:positive regulation of translational fidelity			IPR001912 (SMART); IPR005710 (TIGRFAM); IPR036986 (G3DSA:3.10.290.GENE3D); IPR001912 (PFAM); IPR002942 (PFAM); mobidb-lite (MOBIDB_LITE); PTHR11831:SF5 (PANTHER); IPR022801 (PANTHER); IPR002942 (PROSITE_PROFILES); IPR002942 (CDD); SSF55174 (SUPERFAMILY)	F:GO:0003723; F:GO:0003735; C:GO:0005622; P:GO:0006412; C:GO:0015935; F:GO:0019843	F:RNA binding; F:structural constituent of ribosome; C:intracellular; P:translation; C:small ribosomal subunit; F:rRNA binding
SPF_FS5_contig_196	[INTERPRO, BLASTED, MAPPED, GO-SLIM]	60S ribosomal protein L7	866	15	8.35508e-134	87.12	5	F:GO:0003735; C:GO:0005829; C:GO:0005840; P:GO:0034641; P:GO:0042254	F:structural constituent of ribosome; C:cytosol; C:ribosome; P:cellular nitrogen compound metabolic process; P:ribosome biogenesis			IPR012988 (PFAM); IPR036919 (G3DSA:3.30.1390.GENE3D); IPR016082 (PFAM); IPR023106 (G3DSA:1.10.15.GENE3D); IPR005998 (TIGRFAM); IPR039699 (PANTHER); IPR035808 (CDD); IPR036919 (SUPERFAMILY)	no GO terms	no GO terms
SPF_FS5_contig_197	[INTERPRO, BLASTED, MAPPED, GO-SLIM]	lysosome membrane protein 2-like	2279	15	3.69095e-126	61.65	1	C:GO:0016021	C:integral component of membrane			IPR005428 (PRINTS); IPR002159 (PRINTS); IPR002159 (PFAM); IPR002159 (PANTHER); PTHR11923:SF91 (PANTHER)	C:GO:0016020	C:membrane
SPF_FS5_contig_198	[INTERPRO, BLASTED, MAPPED, GO-SLIM]	Golgi-associated plant pathogenesis-related protein 1	867	15	2.15432e-37	66.55	1	C:GO:0005576	C:extracellular region			IPR001283 (PRINTS); IPR002413 (PRINTS); IPR014044 (SMART); IPR014044 (PFAM); IPR035940 (G3DSA:3.40.33.GENE3D); PTHR10334:SF332 (PANTHER); IPR001283 (PANTHER); IPR034113 (CDD); IPR035940 (SUPERFAMILY)	no GO terms	no GO terms
SPF_FS5_contig_199	[INTERPRO, BLASTED, MAPPED, GO-SLIM]	mitochondria-eating protein-like isoform X3	788	15	8.39529e-85	80.66	3	C:GO:0005739; P:GO:0007005; P:GO:0009056	C:mitochondrion; P:mitochondrion organization; P:catabolic process			mobidb-lite (MOBIDB_LITE); mobidb-lite (MOBIDB_LITE); IPR026169 (PANTHER); PTHR21771:SF0 (PANTHER)	C:GO:0005741; P:GO:0035694	C:mitochondrial outer membrane; P:mitochondrial protein catabolic process
SPF_FS5_contig_200	[INTERPRO, BLASTED, MAPPED, GO-SLIM]	nucleolin isoform X2	1660	15	6.61114e-36	58.22	3	F:GO:0003674; C:GO:0005634; C:GO:0032991	F:molecular_function; C:nucleus; C:protein-containing complex			IPR000504 (SMART); IPR012677 (G3DSA:3.30.70.GENE3D); IPR012677 (G3DSA:3.30.70.GENE3D); IPR000504 (PFAM); mobidb-lite (MOBIDB_LITE); mobidb-lite (MOBIDB_LITE); mobidb-lite (MOBIDB_LITE); mobidb-lite (MOBIDB_LITE); mobidb-lite (MOBIDB_LITE); PTHR44769 (PANTHER); IPR000504 (PROSITE_PROFILES); IPR000504 (PROSITE_PROFILES); cd00590 (CDD); IPR035979 (SUPERFAMILY); IPR035979 (SUPERFAMILY)	F:GO:0003676	F:nucleic acid binding
SPF_FS5_contig_202	[INTERPRO, BLASTED, MAPPED, GO-SLIM]	serine protease 27-like	575	15	5.44329e-47	61.97	2	F:GO:0004252; P:GO:0006508	F:serine-type endopeptidase activity; P:proteolysis			IPR001314 (PRINTS); IPR001254 (SMART); G3DSA:2.40.10.10 (GENE3D); IPR001254 (PFAM); G3DSA:2.40.10.10 (GENE3D); PTHR24253 (PANTHER); IPR001254 (PROSITE_PROFILES); PS51257 (PROSITE_PROFILES); IPR001254 (CDD); IPR009003 (SUPERFAMILY)	F:GO:0004252; P:GO:0006508	F:serine-type endopeptidase activity; P:proteolysis
SPF_FS5_contig_203	[INTERPRO, BLASTED, MAPPED, GO-SLIM]	serine/threonine-protein kinase Nek4-like	767	15	1.86288e-27	70.34	2	F:GO:0016301; F:GO:0016746	F:kinase activity; F:transferase activity, transferring acyl groups			no IPS match	no IPS match	no IPS match
SPF_FS5_contig_205	[INTERPRO, BLASTED, MAPPED, GO-SLIM]	cathepsin L1	726	15	4.58844e-121	79.69	5	F:GO:0004197; C:GO:0005615; C:GO:0005764; C:GO:0016021; P:GO:0051603	F:cysteine-type endopeptidase activity; C:extracellular space; C:lysosome; C:integral component of membrane; P:proteolysis involved in cellular protein catabolic process	EC:3.4.22	Acting on peptide bonds (peptidases)	IPR000668 (PRINTS); IPR000668 (SMART); G3DSA:3.90.70.10 (GENE3D); IPR000668 (PFAM); PTHR12411:SF57 (PANTHER); IPR013128 (PANTHER); IPR039417 (CDD); IPR038765 (SUPERFAMILY)	P:GO:0006508; F:GO:0008234	P:proteolysis; F:cysteine-type peptidase activity
SPF_FS5_contig_210	[INTERPRO, BLASTED, MAPPED, GO-SLIM]	dipeptidyl peptidase 1 isoform X1	1928	15	8.78844e-176	65.32	3	C:GO:0005737; F:GO:0008233; C:GO:0043226	C:cytoplasm; F:peptidase activity; C:organelle			IPR000668 (PRINTS); IPR000668 (SMART); IPR036496 (G3DSA:2.40.128.GENE3D); G3DSA:3.90.70.10 (GENE3D); IPR000668 (PFAM); IPR014882 (PFAM); PTHR12411:SF354 (PANTHER); IPR013128 (PANTHER); IPR038765 (SUPERFAMILY); IPR036496 (SUPERFAMILY)	P:GO:0006508; F:GO:0008234	P:proteolysis; F:cysteine-type peptidase activity
SPF_FS5_contig_211	[INTERPRO, BLASTED, MAPPED, GO-SLIM]	NADH dehydrogenase [ubiquinone] 1 alpha subcomplex subunit 10, mitochondrial	1794	15	1.7916e-66	56.98	1	C:GO:0005739	C:mitochondrion			IPR031314 (PFAM); G3DSA:3.40.50.300 (GENE3D); PTHR10513:SF15 (PANTHER); PTHR10513 (PANTHER); IPR027417 (SUPERFAMILY)	no GO terms	no GO terms
SPF_FS5_contig_212	[INTERPRO, BLASTED, MAPPED, GO-SLIM]	sodium-independent sulfate anion transporter	2440	15	3.74756e-157	61.72	4	F:GO:0008271; P:GO:0008272; C:GO:0016021; P:GO:0055085	F:secondary active sulfate transmembrane transporter activity; P:sulfate transport; C:integral component of membrane; P:transmembrane transport			IPR036513 (G3DSA:3.30.750.GENE3D); IPR002645 (PFAM); IPR011547 (PFAM); IPR001902 (TIGRFAM); mobidb-lite (MOBIDB_LITE); mobidb-lite (MOBIDB_LITE); IPR001902 (PANTHER); PTHR11814:SF55 (PANTHER); IPR002645 (PROSITE_PROFILES); cd07042 (CDD); IPR036513 (SUPERFAMILY)	F:GO:0008271; P:GO:0008272; F:GO:0015116; C:GO:0016020; C:GO:0016021; P:GO:0055085	F:secondary active sulfate transmembrane transporter activity; P:sulfate transport; F:sulfate transmembrane transporter activity; C:membrane; C:integral component of membrane; P:transmembrane transport
SPF_FS5_contig_213	[INTERPRO, BLASTED, MAPPED, GO-SLIM]	gastrula zinc finger protein XlCGF49.1-like	302	15	1.64805e-36	75.16	5	F:GO:0003700; C:GO:0005654; F:GO:0043565; P:GO:0045892; P:GO:0045944	F:DNA-binding transcription factor activity; C:nucleoplasm; F:sequence-specific DNA binding; P:negative regulation of transcription, DNA-templated; P:positive regulation of transcription by RNA polymerase II			IPR013087 (SMART); IPR013087 (PFAM); G3DSA:3.30.160.60 (GENE3D); G3DSA:3.30.160.60 (GENE3D); PTHR44966 (PANTHER); IPR013087 (PROSITE_PROFILES); IPR013087 (PROSITE_PROFILES); IPR036236 (SUPERFAMILY); IPR036236 (SUPERFAMILY)	F:GO:0003676	F:nucleic acid binding
SPF_FS5_contig_220	[INTERPRO, BLASTED, MAPPED, GO-SLIM]	far upstream element-binding protein 1-like isoform X2	3452	15	1.17627e-83	61.01	1	F:GO:0003723	F:RNA binding			IPR004087 (SMART); IPR036612 (G3DSA:3.30.1370.GENE3D); IPR036612 (G3DSA:3.30.1370.GENE3D); IPR004088 (PFAM); IPR036612 (G3DSA:3.30.1370.GENE3D); IPR036612 (G3DSA:3.30.1370.GENE3D); mobidb-lite (MOBIDB_LITE); mobidb-lite (MOBIDB_LITE); mobidb-lite (MOBIDB_LITE); mobidb-lite (MOBIDB_LITE); mobidb-lite (MOBIDB_LITE); mobidb-lite (MOBIDB_LITE); PTHR10288:SF145 (PANTHER); PTHR10288 (PANTHER); PS50084 …	F:GO:0003676; F:GO:0003723	F:nucleic acid binding; F:RNA binding
SPF_FS5_contig_221	[INTERPRO, BLASTED, MAPPED, GO-SLIM]	casein kinase I-like isoform X6	2920	15	8.20243e-164	80.49	9	F:GO:0004674; F:GO:0005524; C:GO:0005634; C:GO:0005737; C:GO:0005886; P:GO:0006897; P:GO:0018105; P:GO:0018107; P:GO:0090263	F:protein serine/threonine kinase activity; F:ATP binding; C:nucleus; C:cytoplasm; C:plasma membrane; P:endocytosis; P:peptidyl-serine phosphorylation; P:peptidyl-threonine phosphorylation; P:positive regulation of canonical Wnt signaling pathway	EC:2.7.11	Transferring phosphorus-containing groups	IPR000719 (SMART); G3DSA:1.10.510.10 (GENE3D); IPR000719 (PFAM); mobidb-lite (MOBIDB_LITE); mobidb-lite (MOBIDB_LITE); mobidb-lite (MOBIDB_LITE); PTHR11909 (PANTHER); PTHR11909:SF155 (PANTHER); IPR000719 (PROSITE_PROFILES); IPR011009 (SUPERFAMILY)	F:GO:0004672; F:GO:0005524; P:GO:0006468	F:protein kinase activity; F:ATP binding; P:protein phosphorylation
SPF_FS5_contig_222	[INTERPRO, BLASTED, MAPPED, GO-SLIM]	acid-sensing ion channel 1-like	925	15	1.93739e-11	48.59	3	F:GO:0005272; P:GO:0006814; C:GO:0016020	F:sodium channel activity; P:sodium ion transport; C:membrane			IPR001873 (PFAM); G3DSA:2.60.470.10 (GENE3D); mobidb-lite (MOBIDB_LITE); mobidb-lite (MOBIDB_LITE); IPR001873 (PANTHER)	F:GO:0005272; P:GO:0006814; C:GO:0016020	F:sodium channel activity; P:sodium ion transport; C:membrane
SPF_FS5_contig_224	[INTERPRO, BLASTED, MAPPED, GO-SLIM]	acid-sensing ion channel 1	566	15	2.66326e-27	49.85	3	F:GO:0005272; P:GO:0006814; C:GO:0016020	F:sodium channel activity; P:sodium ion transport; C:membrane			IPR001873 (PRINTS); IPR001873 (PFAM); G3DSA:1.10.287.770 (GENE3D); G3DSA:1.10.287.820 (GENE3D); PTHR11690:SF126 (PANTHER); IPR001873 (PANTHER)	F:GO:0005272; P:GO:0006814; C:GO:0016020	F:sodium channel activity; P:sodium ion transport; C:membrane
SPF_FS5_contig_225	[INTERPRO, BLASTED, MAPPED, GO-SLIM]	FYVE, RhoGEF and PH domain-containing protein 6	3702	15	3.23148e-142	64.62	3	P:GO:0007165; F:GO:0019899; F:GO:0043167	P:signal transduction; F:enzyme binding; F:ion binding			IPR000219 (SMART); IPR000306 (SMART); IPR001849 (SMART); IPR011993 (G3DSA:2.30.29.GENE3D); IPR013083 (G3DSA:3.30.40.GENE3D); IPR000306 (PFAM); IPR035899 (G3DSA:1.20.900.GENE3D); IPR001849 (PFAM); IPR000219 (PFAM); IPR011993 (G3DSA:2.30.29.GENE3D); mobidb-lite (MOBIDB_LITE); mobidb-lite (MOBIDB_LITE); mobidb-lite (MOBIDB_LITE); mobidb-lite (MOBIDB_LITE); mobidb-lite (MOBIDB_LITE); mobidb-lite (MOB…	F:GO:0005089; P:GO:0035023; F:GO:0046872	F:Rho guanyl-nucleotide exchange factor activity; P:regulation of Rho protein signal transduction; F:metal ion binding
SPF_FS5_contig_226	[INTERPRO, BLASTED, MAPPED, GO-SLIM]	cholesterol 7-alpha-monooxygenase-like	2112	15	5.89334e-159	63.4	6	F:GO:0004497; F:GO:0005506; C:GO:0016020; F:GO:0016705; F:GO:0020037; P:GO:0055114	F:monooxygenase activity; F:iron ion binding; C:membrane; F:oxidoreductase activity, acting on paired donors, with incorporation or reduction of molecular oxygen; F:heme binding; P:oxidation-reduction process			IPR002403 (PRINTS); IPR024204 (PIRSF); IPR001128 (PFAM); IPR036396 (G3DSA:1.10.630.GENE3D); PTHR24304 (PANTHER); IPR036396 (SUPERFAMILY)	F:GO:0004497; F:GO:0005506; F:GO:0016705; F:GO:0020037; P:GO:0055114	F:monooxygenase activity; F:iron ion binding; F:oxidoreductase activity, acting on paired donors, with incorporation or reduction of molecular oxygen; F:heme binding; P:oxidation-reduction process
SPF_FS5_contig_229	[INTERPRO, BLASTED, MAPPED, GO-SLIM]	puromycin-sensitive aminopeptidase-like	2950	15	0	75.4	3	P:GO:0006508; F:GO:0008237; F:GO:0008270	P:proteolysis; F:metallopeptidase activity; F:zinc ion binding			IPR001930 (PRINTS); G3DSA:1.25.50.20 (GENE3D); IPR024571 (PFAM); G3DSA:2.60.40.1910 (GENE3D); G3DSA:1.10.390.60 (GENE3D); G3DSA:2.60.40.1730 (GENE3D); IPR014782 (PFAM); PF17900 (PFAM); IPR001930 (PANTHER); PTHR11533:SF205 (PANTHER); IPR034016 (CDD); SSF63737 (SUPERFAMILY); SSF55486 (SUPERFAMILY)	P:GO:0006508; F:GO:0008237; F:GO:0008270	P:proteolysis; F:metallopeptidase activity; F:zinc ion binding
SPF_FS5_contig_231	[INTERPRO, BLASTED, MAPPED, GO-SLIM]	60S ribosomal protein L37a	897	15	5.5321e-46	92.54	4	P:GO:0002181; F:GO:0003735; C:GO:0022625; F:GO:0046872	P:cytoplasmic translation; F:structural constituent of ribosome; C:cytosolic large ribosomal subunit; F:metal ion binding			IPR002674 (TIGRFAM); IPR011331 (G3DSA:2.20.25.GENE3D); IPR002674 (PFAM); IPR002674 (PANTHER); IPR002674 (HAMAP); IPR011332 (SUPERFAMILY)	F:GO:0003735; C:GO:0005622; C:GO:0005840; P:GO:0006412	F:structural constituent of ribosome; C:intracellular; C:ribosome; P:translation
SPF_FS5_contig_233	[INTERPRO, BLASTED, MAPPED, GO-SLIM]	beta,beta-carotene 9',10'-oxygenase-like	2034	15	4.46261e-108	55.04	2	F:GO:0016702; P:GO:0055114	F:oxidoreductase activity, acting on single donors with incorporation of molecular oxygen, incorporation of two atoms of oxygen; P:oxidation-reduction process			IPR004294 (PFAM); IPR004294 (PANTHER); PTHR10543:SF24 (PANTHER)	F:GO:0016702; P:GO:0055114	F:oxidoreductase activity, acting on single donors with incorporation of molecular oxygen, incorporation of two atoms of oxygen; P:oxidation-reduction process
SPF_FS5_contig_234	[INTERPRO, BLASTED, MAPPED, GO-SLIM]	heterogeneous nuclear ribonucleoprotein H2-like	1476	15	1.35119e-61	74.7	1	F:GO:0003723	F:RNA binding			IPR000504 (SMART); IPR000504 (PFAM); IPR012677 (G3DSA:3.30.70.GENE3D); mobidb-lite (MOBIDB_LITE); mobidb-lite (MOBIDB_LITE); mobidb-lite (MOBIDB_LITE); mobidb-lite (MOBIDB_LITE); PTHR13976 (PANTHER); PTHR13976:SF34 (PANTHER); IPR000504 (PROSITE_PROFILES); IPR035979 (SUPERFAMILY)	F:GO:0003676	F:nucleic acid binding
SPF_FS5_contig_235	[INTERPRO, BLASTED, MAPPED, GO-SLIM]	glycogen synthase kinase-3 beta	2571	15	0	87.68	3	F:GO:0004674; F:GO:0005524; P:GO:0006468	F:protein serine/threonine kinase activity; F:ATP binding; P:protein phosphorylation	EC:2.7.11	Transferring phosphorus-containing groups	IPR000719 (SMART); G3DSA:1.10.510.10 (GENE3D); IPR000719 (PFAM); G3DSA:3.30.200.20 (GENE3D); mobidb-lite (MOBIDB_LITE); mobidb-lite (MOBIDB_LITE); PTHR24057:SF14 (PANTHER); PTHR24057 (PANTHER); IPR000719 (PROSITE_PROFILES); IPR039192 (CDD); IPR011009 (SUPERFAMILY)	F:GO:0004672; F:GO:0005524; P:GO:0006468	F:protein kinase activity; F:ATP binding; P:protein phosphorylation
SPF_FS5_contig_237	[INTERPRO, BLASTED, MAPPED, GO-SLIM]	Chloride intracellular channel exc-4	1526	15	2.19882e-60	60.81	2	C:GO:0005634; F:GO:0022857	C:nucleus; F:transmembrane transporter activity			G3DSA:3.40.30.10 (GENE3D); PF13410 (PFAM); G3DSA:1.20.1050.10 (GENE3D); PTHR43920:SF5 (PANTHER); PTHR43920 (PANTHER); IPR036282 (SUPERFAMILY)	no GO terms	no GO terms
SPF_FS5_contig_238	[INTERPRO, BLASTED, MAPPED, GO-SLIM]	60S ribosomal protein L18a	656	15	6.30849e-100	86.34	3	F:GO:0003735; P:GO:0006412; C:GO:0022625	F:structural constituent of ribosome; P:translation; C:cytosolic large ribosomal subunit			IPR023573 (PFAM); G3DSA:3.10.20.10 (GENE3D); G3DSA:3.10.20.10 (GENE3D); IPR021138 (PIRSF); IPR028877 (PANTHER); PTHR10052:SF28 (PANTHER); IPR028877 (HAMAP); SSF160374 (SUPERFAMILY)	F:GO:0003735; C:GO:0005840; P:GO:0006412	F:structural constituent of ribosome; C:ribosome; P:translation
SPF_FS5_contig_239	[INTERPRO, BLASTED, MAPPED, GO-SLIM]	serine protease hepsin	2256	15	6.17437e-87	54.52	2	F:GO:0004252; P:GO:0006508	F:serine-type endopeptidase activity; P:proteolysis			IPR001314 (PRINTS); IPR000859 (SMART); IPR001254 (SMART); IPR035914 (G3DSA:2.60.120.GENE3D); PIRSF001155 (PIRSF); IPR035914 (G3DSA:2.60.120.GENE3D); IPR000859 (PFAM); IPR001254 (PFAM); G3DSA:2.40.10.10 (GENE3D); mobidb-lite (MOBIDB_LITE); PTHR24251 (PANTHER); IPR001254 (PROSITE_PROFILES); PS51257 (PROSITE_PROFILES); IPR000859 (PROSITE_PROFILES); IPR000859 (PROSITE_PROFILES); IPR000859 (CDD); IPR0…	F:GO:0004252; P:GO:0006508	F:serine-type endopeptidase activity; P:proteolysis
SPF_FS5_contig_240	[INTERPRO, BLASTED, MAPPED, GO-SLIM]	multidrug resistance protein 1	5648	15	0	65.85	8	F:GO:0005524; C:GO:0005886; P:GO:0009987; C:GO:0016021; F:GO:0042626; P:GO:0050789; P:GO:0055085; F:GO:0140326	F:ATP binding; C:plasma membrane; P:cellular process; C:integral component of membrane; F:ATPase-coupled transmembrane transporter activity; P:regulation of biological process; P:transmembrane transport; F:ATPase-coupled intramembrane lipid transporter activity	EC:3.6.1.3; EC:3.6.3.1; EC:3.6.1.15	Adenosinetriphosphatase; Acting on acid anhydrides; Nucleoside-triphosphate phosphatase	IPR003593 (SMART); G3DSA:3.40.50.300 (GENE3D); IPR003439 (PFAM); IPR003439 (PFAM); G3DSA:3.40.50.300 (GENE3D); IPR036640 (G3DSA:1.20.1560.GENE3D); IPR011527 (PFAM); mobidb-lite (MOBIDB_LITE); mobidb-lite (MOBIDB_LITE); mobidb-lite (MOBIDB_LITE); mobidb-lite (MOBIDB_LITE); mobidb-lite (MOBIDB_LITE); PTHR24221:SF386 (PANTHER); IPR039421 (PANTHER); IPR011527 (PROSITE_PROFILES); IPR003439 (PROSITE_PR…	F:GO:0005524; C:GO:0016021; F:GO:0016887; F:GO:0042626; P:GO:0055085	F:ATP binding; C:integral component of membrane; F:ATPase activity; F:ATPase-coupled transmembrane transporter activity; P:transmembrane transport
SPF_FS5_contig_243	[INTERPRO, BLASTED, MAPPED, GO-SLIM]	ATP synthase subunit alpha, mitochondrial	2029	15	0	89.06	5	F:GO:0005524; P:GO:0015986; C:GO:0045261; F:GO:0046933; P:GO:0098655	F:ATP binding; P:ATP synthesis coupled proton transport; C:proton-transporting ATP synthase complex, catalytic core F(1); F:proton-transporting ATP synthase activity, rotational mechanism; P:cation transmembrane transport	EC:3.6.1.3; EC:3.6.1.15	Adenosinetriphosphatase; Nucleoside-triphosphate phosphatase	IPR000793 (PFAM); IPR005294 (PIRSF); G3DSA:3.40.50.300 (GENE3D); IPR038376 (G3DSA:1.20.150.GENE3D); IPR000194 (PFAM); IPR004100 (PFAM); IPR023366 (G3DSA:2.40.30.GENE3D); IPR005294 (TIGRFAM); PTHR43089 (PANTHER); PTHR43089:SF5 (PANTHER); IPR005294 (HAMAP); IPR033732 (CDD); SSF47917 (SUPERFAMILY); IPR027417 (SUPERFAMILY); IPR036121 (SUPERFAMILY)	F:GO:0005524; P:GO:0015986; F:GO:0032559; C:GO:0045261; P:GO:0046034; F:GO:0046933; P:GO:1902600	F:ATP binding; P:ATP synthesis coupled proton transport; F:adenyl ribonucleotide binding; C:proton-transporting ATP synthase complex, catalytic core F(1); P:ATP metabolic process; F:proton-transporting ATP synthase activity, rotational mechanism; P:proton transmembrane transport
SPF_FS5_contig_244	[INTERPRO, BLASTED, MAPPED, GO-SLIM]	5'-AMP-activated protein kinase catalytic subunit alpha-2-like isoform X14	2988	15	0	74.32	3	F:GO:0004672; F:GO:0005524; P:GO:0006468	F:protein kinase activity; F:ATP binding; P:protein phosphorylation			IPR000719 (SMART); G3DSA:3.30.310.80 (GENE3D); PIRSF000615 (PIRSF); IPR032270 (PFAM); G3DSA:1.10.8.10 (GENE3D); G3DSA:1.10.510.10 (GENE3D); G3DSA:3.30.200.20 (GENE3D); IPR000719 (PFAM); mobidb-lite (MOBIDB_LITE); mobidb-lite (MOBIDB_LITE); mobidb-lite (MOBIDB_LITE); mobidb-lite (MOBIDB_LITE); PTHR24343:SF303 (PANTHER); PTHR24343 (PANTHER); IPR000719 (PROSITE_PROFILES); cd14336 (CDD); cd12122 (CDD…	F:GO:0004672; F:GO:0005524; P:GO:0006468	F:protein kinase activity; F:ATP binding; P:protein phosphorylation
SPF_FS5_contig_245	[BLASTED, MAPPED, ANNOTATED]	Solute carrier family 35 member F1	3161	15	1.84556e-06	52.14	1	C:GO:0016020	C:membrane
SPF_FS5_contig_247	[INTERPRO, BLASTED, MAPPED, GO-SLIM]	tectonin beta-propeller repeat-containing protein 1-like	1078	15	4.08322e-48	55.84	3	C:GO:0005764; F:GO:0008289; F:GO:0043167	C:lysosome; F:lipid binding; F:ion binding			IPR006624 (SMART); IPR006624 (PFAM); PTHR23250 (PANTHER); PTHR23250:SF3 (PANTHER); PTHR23250:SF3 (PANTHER); PTHR23250 (PANTHER)	no GO terms	no GO terms
SPF_FS5_contig_248	[INTERPRO, BLASTED, MAPPED, GO-SLIM]	lectin L6-like	1051	15	9.48231e-47	56.13	3	C:GO:0005764; F:GO:0008289; F:GO:0043167	C:lysosome; F:lipid binding; F:ion binding			IPR006624 (SMART); IPR006624 (PFAM); PTHR23250:SF3 (PANTHER); PTHR23250 (PANTHER); PTHR23250:SF3 (PANTHER); PTHR23250 (PANTHER); PTHR23250 (PANTHER)	no GO terms	no GO terms
SPF_FS5_contig_249	[INTERPRO, BLASTED, MAPPED, GO-SLIM]	acid ceramidase-like	2143	15	2.78484e-147	72.53	3	C:GO:0005764; P:GO:0006629; F:GO:0016787	C:lysosome; P:lipid metabolic process; F:hydrolase activity			IPR029130 (PFAM); G3DSA:3.60.60.10 (GENE3D); IPR029132 (PFAM); IPR016699 (PIRSF); PTHR28583:SF1 (PANTHER); PTHR28583 (PANTHER); cd01903 (CDD)	C:GO:0005764; P:GO:0006629	C:lysosome; P:lipid metabolic process
SPF_FS5_contig_251	[INTERPRO, BLASTED, MAPPED, GO-SLIM]	gastric triacylglycerol lipase	705	15	8.4315e-12	67.54	1	F:GO:0003674	F:molecular_function			IPR029058 (G3DSA:3.40.50.GENE3D); PTHR11005:SF78 (PANTHER); PTHR11005 (PANTHER)	no GO terms	no GO terms
SPF_FS5_contig_253	[INTERPRO, BLASTED, MAPPED, GO-SLIM]	gastric triacylglycerol lipase-like	1259	15	1.47146e-102	64.44	2	F:GO:0003674; P:GO:0006629	F:molecular_function; P:lipid metabolic process			IPR006693 (PFAM); IPR029058 (G3DSA:3.40.50.GENE3D); IPR022742 (PFAM); PTHR11005 (PANTHER); PTHR11005:SF78 (PANTHER); IPR029058 (SUPERFAMILY)	P:GO:0006629	P:lipid metabolic process
SPF_FS5_contig_256	[INTERPRO, BLASTED, MAPPED, GO-SLIM]	ubiquitin-conjugating enzyme E2 R2-like	1517	15	5.50569e-116	88.52	4	P:GO:0006464; P:GO:0009056; F:GO:0016874; F:GO:0043167	P:cellular protein modification process; P:catabolic process; F:ligase activity; F:ion binding			SM00212 (SMART); IPR000608 (PFAM); IPR016135 (G3DSA:3.10.110.GENE3D); mobidb-lite (MOBIDB_LITE); PTHR24067:SF157 (PANTHER); PTHR24067 (PANTHER); IPR000608 (PROSITE_PROFILES); IPR000608 (CDD); IPR016135 (SUPERFAMILY)	no GO terms	no GO terms
SPF_FS5_contig_257	[INTERPRO, BLASTED, MAPPED, GO-SLIM]	cathepsin B	1594	15	2.94646e-144	77.9	5	F:GO:0004197; C:GO:0005615; C:GO:0005764; P:GO:0050790; P:GO:0051603	F:cysteine-type endopeptidase activity; C:extracellular space; C:lysosome; P:regulation of catalytic activity; P:proteolysis involved in cellular protein catabolic process	EC:3.4.22	Acting on peptide bonds (peptidases)	IPR000668 (PRINTS); IPR000668 (SMART); G3DSA:3.90.70.10 (GENE3D); IPR012599 (PFAM); IPR000668 (PFAM); PTHR12411:SF540 (PANTHER); IPR013128 (PANTHER); PS51257 (PROSITE_PROFILES); cd02620 (CDD); IPR038765 (SUPERFAMILY)	F:GO:0004197; P:GO:0006508; F:GO:0008234; P:GO:0050790	F:cysteine-type endopeptidase activity; P:proteolysis; F:cysteine-type peptidase activity; P:regulation of catalytic activity
SPF_FS5_contig_258	[INTERPRO, BLASTED, MAPPED, GO-SLIM]	40S ribosomal protein SA-like	989	15	1.05138e-126	92.89	12	P:GO:0000028; P:GO:0000447; P:GO:0000461; F:GO:0003735; F:GO:0005055; C:GO:0005634; C:GO:0005886; P:GO:0006407; P:GO:0006412; P:GO:0007155; C:GO:0022627; F:GO:0043236	P:ribosomal small subunit assembly; P:endonucleolytic cleavage in ITS1 to separate SSU-rRNA from 5.8S rRNA and LSU-rRNA from tricistronic rRNA transcript (SSU-rRNA, 5.8S rRNA, LSU-rRNA); P:endonucleolytic cleavage to generate mature 3'-end of SSU-rRNA from (SSU-rRNA, 5.8S rRNA, LSU-rRNA); F:structural constituent of ribosome; F:laminin receptor activity; C:nucleus; C:plasma membrane; P:rRNA expor…			IPR001865 (PRINTS); IPR005707 (TIGRFAM); IPR001865 (PFAM); IPR032281 (PFAM); G3DSA:3.40.50.10490 (GENE3D); mobidb-lite (MOBIDB_LITE); IPR005707 (PANTHER); PTHR11489:SF9 (PANTHER); IPR027498 (HAMAP); IPR001865 (CDD); IPR023591 (SUPERFAMILY)	F:GO:0003735; C:GO:0005622; C:GO:0005840; P:GO:0006412; C:GO:0015935	F:structural constituent of ribosome; C:intracellular; C:ribosome; P:translation; C:small ribosomal subunit
SPF_FS5_contig_260	[INTERPRO, BLASTED, MAPPED, GO-SLIM]	glutathione S-transferase pi	1261	15	9.66229e-75	70.11	41	P:GO:0000302; P:GO:0002674; F:GO:0004364; F:GO:0004602; C:GO:0005576; C:GO:0005739; C:GO:0005829; P:GO:0006749; P:GO:0006805; P:GO:0007417; F:GO:0008432; P:GO:0009636; P:GO:0009725; P:GO:0009991; P:GO:0010804; F:GO:0019207; P:GO:0032691; P:GO:0032720; P:GO:0032930; P:GO:0034599; C:GO:0034774; P:GO:0035726; F:GO:0035730; F:GO:0035731; P:GO:0035732; P:GO:0043124; P:GO:0043312; P:GO:0043508; P:GO:00…	P:response to reactive oxygen species; P:negative regulation of acute inflammatory response; F:glutathione transferase activity; F:glutathione peroxidase activity; C:extracellular region; C:mitochondrion; C:cytosol; P:glutathione metabolic process; P:xenobiotic metabolic process; P:central nervous system development; F:JUN kinase binding; P:response to toxic substance; P:response to hormone; P:re…	EC:2.5.1.18; EC:1.11.1.9; EC:1.11.1.7	Glutathione transferase; Glutathione peroxidase; Peroxidase	IPR003082 (PRINTS); IPR004046 (PFAM); IPR004045 (PFAM); G3DSA:1.20.1050.10 (GENE3D); G3DSA:3.40.30.10 (GENE3D),SFLDG01205 (SFLD),SFLDS00019 (SFLD); IPR040079 (PANTHER); PTHR11571:SF141 (PANTHER); IPR004045 (PROSITE_PROFILES); IPR010987 (PROSITE_PROFILES); cd03210 (CDD); IPR036249 (SUPERFAMILY); IPR036282 (SUPERFAMILY)	F:GO:0004364; F:GO:0005515	F:glutathione transferase activity; F:protein binding
SPF_FS5_contig_261	[INTERPRO, BLASTED, MAPPED, GO-SLIM]	myosin-2 essential light chain isoform X2	1009	15	8.81944e-50	73.66	1	F:GO:0043167	F:ion binding			IPR002048 (SMART); G3DSA:1.10.238.10 (GENE3D); G3DSA:1.10.238.10 (GENE3D); PTHR23048 (PANTHER); IPR002048 (PROSITE_PROFILES); IPR002048 (PROSITE_PROFILES); IPR002048 (CDD); IPR011992 (SUPERFAMILY)	F:GO:0005509	F:calcium ion binding
SPF_FS5_contig_262	[INTERPRO, BLASTED, MAPPED, GO-SLIM]	enolase	5760	15	0	87.22	9	C:GO:0005829; P:GO:0005975; P:GO:0006091; P:GO:0009056; P:GO:0009058; F:GO:0016829; C:GO:0032991; P:GO:0034641; F:GO:0043167	C:cytosol; P:carbohydrate metabolic process; P:generation of precursor metabolites and energy; P:catabolic process; P:biosynthetic process; F:lyase activity; C:protein-containing complex; P:cellular nitrogen compound metabolic process; F:ion binding	EC:4.2.1.11	Phosphopyruvate hydratase	IPR000941 (PRINTS); IPR020811 (SMART); IPR020810 (SMART); IPR020811 (PFAM); IPR036849 (G3DSA:3.20.20.GENE3D); IPR000941 (PIRSF); IPR000941 (TIGRFAM); IPR020810 (PFAM); IPR029017 (G3DSA:3.30.390.GENE3D); IPR000941 (PTHR11902:PANTHER); IPR000941 (PANTHER); IPR000941 (HAMAP); IPR000941 (CDD); IPR036849 (SUPERFAMILY); SSF54826 (SUPERFAMILY)	C:GO:0000015; F:GO:0000287; F:GO:0004634; P:GO:0006096	C:phosphopyruvate hydratase complex; F:magnesium ion binding; F:phosphopyruvate hydratase activity; P:glycolytic process
SPF_FS5_contig_263	[INTERPRO, BLASTED, MAPPED, GO-SLIM]	3-methyl-2-oxobutanoate dehydrogenase [lipoamide] kinase, mitochondrial	2316	15	3.86687e-154	75.22	2	F:GO:0004672; P:GO:0016310	F:protein kinase activity; P:phosphorylation			IPR003594 (SMART); IPR018955 (PFAM); IPR036890 (G3DSA:3.30.565.GENE3D); IPR036784 (G3DSA:1.20.140.GENE3D); IPR003594 (PFAM); IPR039028 (PANTHER); PTHR11947:SF20 (PANTHER); IPR005467 (PROSITE_PROFILES); IPR003594 (CDD); IPR036890 (SUPERFAMILY); IPR036784 (SUPERFAMILY)	F:GO:0004672	F:protein kinase activity
SPF_FS5_contig_264	[INTERPRO, BLASTED, MAPPED, GO-SLIM]	blastula protease 10-like	842	15	1.32251e-42	55.28	3	F:GO:0004222; P:GO:0006508; F:GO:0008270	F:metalloendopeptidase activity; P:proteolysis; F:zinc ion binding			IPR001506 (PRINTS); IPR006026 (SMART); IPR001506 (PFAM); IPR024079 (G3DSA:3.40.390.GENE3D); PTHR10127 (PANTHER); IPR034035 (CDD); SSF55486 (SUPERFAMILY)	F:GO:0004222; P:GO:0006508; F:GO:0008237; F:GO:0008270	F:metalloendopeptidase activity; P:proteolysis; F:metallopeptidase activity; F:zinc ion binding
SPF_FS5_contig_265	[INTERPRO, BLASTED, MAPPED, GO-SLIM]	glutamate--cysteine ligase catalytic subunit	1649	15	1.87822e-168	76.32	2	F:GO:0004357; P:GO:0006750	F:glutamate-cysteine ligase activity; P:glutathione biosynthetic process			G3DSA:1.10.8.960 (GENE3D); G3DSA:3.30.590.50 (GENE3D); IPR004308 (PFAM); mobidb-lite (MOBIDB_LITE); mobidb-lite (MOBIDB_LITE); IPR004308 (PANTHER); IPR014746 (SUPERFAMILY)	F:GO:0003824; F:GO:0004357; P:GO:0006750	F:catalytic activity; F:glutamate-cysteine ligase activity; P:glutathione biosynthetic process
SPF_FS5_contig_266	[INTERPRO, BLASTED, MAPPED, GO-SLIM]	ornithine aminotransferase, mitochondrial-like	2125	15	0	84.57	6	F:GO:0004587; C:GO:0005737; P:GO:0010121; P:GO:0019544; F:GO:0030170; P:GO:0055129	F:ornithine-oxo-acid transaminase activity; C:cytoplasm; P:arginine catabolic process to proline via ornithine; P:arginine catabolic process to glutamate; F:pyridoxal phosphate binding; P:L-proline biosynthetic process	EC:2.6.1.13	Ornithine aminotransferase	IPR010164 (TIGRFAM); IPR005814 (PIRSF); IPR015422 (G3DSA:3.90.1150.GENE3D); IPR015421 (G3DSA:3.40.640.GENE3D); IPR005814 (PFAM); IPR034758 (PTHR11986:PANTHER); PTHR11986 (PANTHER); IPR005814 (CDD); IPR015424 (SUPERFAMILY)	F:GO:0003824; F:GO:0004587; F:GO:0008483; F:GO:0030170	F:catalytic activity; F:ornithine-oxo-acid transaminase activity; F:transaminase activity; F:pyridoxal phosphate binding
SPF_FS5_contig_267	[INTERPRO, BLASTED, MAPPED, GO-SLIM]	glutathione S-transferase	340	4	5.92701e-06	58.76	1	F:GO:0003674	F:molecular_function			G3DSA:1.20.1050.130 (GENE3D); IPR004046 (PFAM); PTHR11571 (PANTHER); IPR010987 (PROSITE_PROFILES); cd03192 (CDD); IPR036282 (SUPERFAMILY)	no GO terms	no GO terms
SPF_FS5_contig_273	[INTERPRO, BLASTED, MAPPED, GO-SLIM]	Transmembrane 9 superfamily member 4	2930	15	0	75.72	3	C:GO:0005769; C:GO:0016021; P:GO:0072657	C:early endosome; C:integral component of membrane; P:protein localization to membrane			IPR004240 (PFAM); IPR004240 (PANTHER); PTHR10766:SF55 (PANTHER)	C:GO:0016021	C:integral component of membrane
SPF_FS5_contig_275	[INTERPRO, BLASTED, MAPPED, GO-SLIM]	predicted protein	723	15	8.10683e-38	54.87	4	F:GO:0004222; P:GO:0006508; F:GO:0008270; P:GO:0032502	F:metalloendopeptidase activity; P:proteolysis; F:zinc ion binding; P:developmental process			IPR001506 (PRINTS); IPR006026 (SMART); IPR024079 (G3DSA:3.40.390.GENE3D); IPR001506 (PFAM); PTHR10127 (PANTHER); IPR034035 (CDD); SSF55486 (SUPERFAMILY)	F:GO:0004222; P:GO:0006508; F:GO:0008237; F:GO:0008270	F:metalloendopeptidase activity; P:proteolysis; F:metallopeptidase activity; F:zinc ion binding
SPF_FS5_contig_276	[INTERPRO, BLASTED, MAPPED, GO-SLIM]	semaphorin-5A	1948	15	6.63144e-14	51.94	1	F:GO:0008233	F:peptidase activity			IPR000884 (SMART); IPR036383 (G3DSA:2.20.100.GENE3D); IPR000884 (PFAM); IPR036383 (G3DSA:2.20.100.GENE3D); mobidb-lite (MOBIDB_LITE); mobidb-lite (MOBIDB_LITE); PTHR44940 (PANTHER); IPR000884 (PROSITE_PROFILES); IPR000884 (PROSITE_PROFILES); IPR036383 (SUPERFAMILY); IPR036383 (SUPERFAMILY)	no GO terms	no GO terms
SPF_FS5_contig_277	[INTERPRO, BLASTED, MAPPED, GO-SLIM]	glutathione S-transferase 4-like	342	15	1.79946e-29	71.37	2	F:GO:0005515; F:GO:0016740	F:protein binding; F:transferase activity			IPR004045 (PFAM); G3DSA:1.20.1050.130 (GENE3D),SFLDS00019 (SFLD); IPR040079 (PTHR11571:PANTHER); PTHR11571 (PANTHER); IPR004045 (PROSITE_PROFILES); cd03039 (CDD); IPR036249 (SUPERFAMILY)	F:GO:0005515	F:protein binding
SPF_FS5_contig_278	[INTERPRO, BLASTED, MAPPED, GO-SLIM]	ornithine decarboxylase-like	1952	15	4.02558e-148	68.83	3	F:GO:0004586; C:GO:0005737; P:GO:0033387	F:ornithine decarboxylase activity; C:cytoplasm; P:putrescine biosynthetic process from ornithine	EC:4.1.1.17	Ornithine decarboxylase	IPR000183 (PRINTS); IPR002433 (PRINTS); IPR022643 (PFAM); IPR009006 (G3DSA:2.40.37.GENE3D); IPR029066 (G3DSA:3.20.20.GENE3D); IPR022644 (PFAM); IPR002433 (PANTHER); cd00622 (CDD); IPR009006 (SUPERFAMILY); IPR029066 (SUPERFAMILY)	F:GO:0003824; P:GO:0006596	F:catalytic activity; P:polyamine biosynthetic process
SPF_FS5_contig_281	[INTERPRO, BLASTED, MAPPED, GO-SLIM]	nucleobindin-2-like isoform X1	2478	15	3.06395e-83	63.7	2	P:GO:0005975; F:GO:0043167	P:carbohydrate metabolic process; F:ion binding			IPR002048 (PFAM); G3DSA:1.10.238.10 (GENE3D); mobidb-lite (MOBIDB_LITE); mobidb-lite (MOBIDB_LITE); IPR040250 (PANTHER); IPR002048 (PROSITE_PROFILES); IPR002048 (PROSITE_PROFILES); IPR011992 (SUPERFAMILY)	F:GO:0005509	F:calcium ion binding
SPF_FS5_contig_283	[INTERPRO, BLASTED, MAPPED, GO-SLIM]	transmembrane protein 97	783	15	6.61093e-43	67.45	2	C:GO:0005634; C:GO:0005783	C:nucleus; C:endoplasmic reticulum			IPR016964 (PIRSF); PF10914 (PFAM); mobidb-lite (MOBIDB_LITE); PTHR31204 (PANTHER); PTHR31204:SF1 (PANTHER); IPR033118 (PROSITE_PROFILES)	no GO terms	no GO terms
SPF_FS5_contig_284	[INTERPRO, BLASTED, MAPPED, GO-SLIM]	60S ribosomal protein L7a-like	1264	15	1.08505e-129	87.34	2	C:GO:0005840; P:GO:0042254	C:ribosome; P:ribosome biogenesis			IPR001921 (PRINTS); IPR018492 (PRINTS); IPR038524 (G3DSA:3.30.1330.GENE3D); IPR004038 (PFAM); mobidb-lite (MOBIDB_LITE); mobidb-lite (MOBIDB_LITE); mobidb-lite (MOBIDB_LITE); PTHR23105:SF97 (PANTHER); PTHR23105 (PANTHER); IPR029064 (SUPERFAMILY)	no GO terms	no GO terms
SPF_FS5_contig_285	[INTERPRO, BLASTED, MAPPED, GO-SLIM]	interferon regulatory factor 2	2225	15	5.96069e-24	59.29	2	F:GO:0044212; P:GO:0050794	F:transcription regulatory region DNA binding; P:regulation of cellular process			IPR001346 (PRINTS); IPR001346 (SMART); IPR001346 (PFAM); IPR036388 (G3DSA:1.10.10.GENE3D); mobidb-lite (MOBIDB_LITE); IPR001346 (PANTHER); IPR001346 (PROSITE_PROFILES); IPR001346 (CDD); IPR036390 (SUPERFAMILY)	F:GO:0044212	F:transcription regulatory region DNA binding
SPF_FS5_contig_286	[BLASTED, MAPPED, ANNOTATED]	predicted protein	968	15	2.6194e-51	50.42	1	C:GO:0016020	C:membrane
SPF_FS5_contig_287	[INTERPRO, BLASTED, MAPPED, GO-SLIM]	splicing factor 3A subunit 3	2233	15	0	84.37	5	P:GO:0000398; F:GO:0003723; C:GO:0005681; F:GO:0008270; P:GO:0060218	P:mRNA splicing, via spliceosome; F:RNA binding; C:spliceosomal complex; F:zinc ion binding; P:hematopoietic stem cell differentiation			IPR021966 (PFAM); IPR031774 (PFAM); IPR024598 (PFAM); PF13297 (PFAM); mobidb-lite (MOBIDB_LITE); mobidb-lite (MOBIDB_LITE); mobidb-lite (MOBIDB_LITE); IPR031776 (PTHR12786:PANTHER); PTHR12786 (PANTHER); IPR000690 (PROSITE_PROFILES)	P:GO:0000398; F:GO:0003676; F:GO:0003723; C:GO:0005634; C:GO:0005681; F:GO:0008270	P:mRNA splicing, via spliceosome; F:nucleic acid binding; F:RNA binding; C:nucleus; C:spliceosomal complex; F:zinc ion binding
SPF_FS5_contig_288	[INTERPRO, BLASTED, MAPPED, GO-SLIM]	tolkin	3052	15	7.08067e-121	54.43	7	F:GO:0004222; P:GO:0007415; P:GO:0008045; F:GO:0008270; P:GO:0008586; P:GO:0010629; P:GO:0016485	F:metalloendopeptidase activity; P:defasciculation of motor neuron axon; P:motor neuron axon guidance; F:zinc ion binding; P:imaginal disc-derived wing vein morphogenesis; P:negative regulation of gene expression; P:protein processing			IPR001506 (PRINTS); IPR000859 (SMART); IPR006026 (SMART); IPR000859 (PFAM); IPR001506 (PFAM); IPR024079 (G3DSA:3.40.390.GENE3D); IPR035914 (G3DSA:2.60.120.GENE3D); PTHR43978 (PANTHER); PTHR43978:SF2 (PANTHER); IPR000859 (PROSITE_PROFILES); IPR034035 (CDD); IPR000859 (CDD); SSF55486 (SUPERFAMILY); IPR035914 (SUPERFAMILY)	F:GO:0004222; P:GO:0006508; F:GO:0008237; F:GO:0008270	F:metalloendopeptidase activity; P:proteolysis; F:metallopeptidase activity; F:zinc ion binding
SPF_FS5_contig_290	[INTERPRO, BLASTED, MAPPED, GO-SLIM]	paramyosin-like isoform X2	3365	15	0	71.95	3	F:GO:0003674; C:GO:0005856; C:GO:0032991	F:molecular_function; C:cytoskeleton; C:protein-containing complex	EC:3.6.1.15	Nucleoside-triphosphate phosphatase	IPR002928 (PFAM); G3DSA:1.20.5.340 (GENE3D); G3DSA:1.20.5.1050 (GENE3D); G3DSA:1.20.5.190 (GENE3D); mobidb-lite (MOBIDB_LITE); PTHR13140 (PANTHER); PTHR13140:SF571 (PANTHER); SSF57997 (SUPERFAMILY); SSF90257 (SUPERFAMILY); SSF57997 (SUPERFAMILY); SSF90257 (SUPERFAMILY); SSF90257 (SUPERFAMILY)	F:GO:0003774; C:GO:0016459	F:motor activity; C:myosin complex
SPF_FS5_contig_292	[INTERPRO, BLASTED, MAPPED, GO-SLIM]	cytochrome b5	727	15	1.60497e-39	73.99	2	F:GO:0003674; C:GO:0005622	F:molecular_function; C:intracellular			IPR001199 (PRINTS); IPR001199 (SMART); IPR001199 (PFAM); IPR036400 (G3DSA:3.10.120.GENE3D); mobidb-lite (MOBIDB_LITE); PTHR19359 (PANTHER); PTHR19359:SF37 (PANTHER); IPR001199 (PROSITE_PROFILES); IPR036400 (SUPERFAMILY)	no GO terms	no GO terms
SPF_FS5_contig_294	[INTERPRO, BLASTED, MAPPED, GO-SLIM]	protein BTG2	1825	15	6.24232e-33	69.2	9	P:GO:0000278; F:GO:0003700; C:GO:0005634; C:GO:0005737; P:GO:0006412; P:GO:0008219; P:GO:0008283; P:GO:0030154; P:GO:0048856	P:mitotic cell cycle; F:DNA-binding transcription factor activity; C:nucleus; C:cytoplasm; P:translation; P:cell death; P:cell population proliferation; P:cell differentiation; P:anatomical structure development			IPR002087 (PRINTS); IPR002087 (SMART); IPR036054 (G3DSA:1.20.120.GENE3D); IPR002087 (PFAM); mobidb-lite (MOBIDB_LITE); mobidb-lite (MOBIDB_LITE); PTHR22978 (PANTHER); PTHR22978:SF31 (PANTHER); IPR036054 (SUPERFAMILY)	no GO terms	no GO terms
SPF_FS5_contig_295	[INTERPRO, BLASTED, MAPPED, GO-SLIM]	Zinc-binding alcohol dehydrogenase domain-containing protein 2	1545	15	1.54537e-137	70.74	2	F:GO:0016491; F:GO:0043167	F:oxidoreductase activity; F:ion binding			IPR020843 (SMART); IPR013149 (PFAM); IPR013154 (PFAM); G3DSA:3.40.50.720 (GENE3D); G3DSA:3.90.180.10 (GENE3D); mobidb-lite (MOBIDB_LITE); PTHR43677:SF3 (PANTHER); PTHR43677 (PANTHER); cd08250 (CDD); IPR011032 (SUPERFAMILY); IPR036291 (SUPERFAMILY)	F:GO:0016491; P:GO:0055114	F:oxidoreductase activity; P:oxidation-reduction process
SPF_FS5_contig_297	[INTERPRO, BLASTED, MAPPED, GO-SLIM]	cytochrome b (mitochondrion)	3706	15	2.5755e-121	86.66	6	C:GO:0005743; P:GO:0006122; F:GO:0008121; C:GO:0016021; C:GO:0045275; F:GO:0046872	C:mitochondrial inner membrane; P:mitochondrial electron transport, ubiquinol to cytochrome c; F:ubiquinol-cytochrome-c reductase activity; C:integral component of membrane; C:respiratory chain complex III; F:metal ion binding	EC:1.10.2; EC:1.10.2.2	Acting on diphenols and related substances as donors; Acting on diphenols and related substances as donors	IPR027387 (G3DSA:1.20.810.GENE3D); IPR005797 (PFAM); PTHR19271 (PANTHER); PTHR19271:SF5 (PANTHER); IPR005797 (PROSITE_PROFILES); IPR016174 (SUPERFAMILY)	F:GO:0009055; C:GO:0016020; F:GO:0016491; P:GO:0022904	F:electron transfer activity; C:membrane; F:oxidoreductase activity; P:respiratory electron transport chain
SPF_FS5_contig_298	[BLASTED, MAPPED, ANNOTATED]	sushi, von Willebrand factor type A, EGF and pentraxin domain-containing protein 1 isoform X1	2007	15	1.27833e-22	38.61	1	F:GO:0005488	F:binding
SPF_FS5_contig_299	[BLASTED, MAPPED, ANNOTATED]	C-type lectin domain family 4 member D	2298	1	4.07207e-07	59.41	1	F:GO:0030246	F:carbohydrate binding
SPF_FS5_contig_300	[BLASTED, MAPPED, ANNOTATED]	brain tumor protein	499	15	9.44278e-07	46.16	1	F:GO:0005488	F:binding
SPF_FS5_contig_302	[BLASTED, MAPPED, ANNOTATED]	sulfotransferase 6B1-like	1818	15	7.54635e-58	52.37	1	F:GO:0016740	F:transferase activity
SPF_FS5_contig_305	[INTERPRO, BLASTED, MAPPED, GO-SLIM]	transient receptor potential cation channel subfamily M member 1 isoform X4	4313	15	0	68	5	F:GO:0005216; P:GO:0006811; C:GO:0016020; P:GO:0051262; P:GO:0055085	F:ion channel activity; P:ion transport; C:membrane; P:protein tetramerization; P:transmembrane transport			IPR005821 (PFAM); IPR041491 (PFAM); IPR032415 (PFAM); mobidb-lite (MOBIDB_LITE); mobidb-lite (MOBIDB_LITE); mobidb-lite (MOBIDB_LITE); PTHR13800 (PANTHER); SSF81324 (SUPERFAMILY)	F:GO:0005216; P:GO:0006811; C:GO:0016020; P:GO:0051262; P:GO:0055085	F:ion channel activity; P:ion transport; C:membrane; P:protein tetramerization; P:transmembrane transport
SPF_FS5_contig_306	[INTERPRO, BLASTED, MAPPED, GO-SLIM]	legumain	1808	15	3.63425e-158	69.78	2	C:GO:0005575; F:GO:0008233	C:cellular_component; F:peptidase activity			IPR001096 (PRINTS); G3DSA:1.10.132.130 (GENE3D); PIRSF500139 (PIRSF); IPR001096 (PIRSF); IPR001096 (PFAM); G3DSA:3.40.50.1460 (GENE3D); PTHR12000:SF3 (PANTHER); IPR001096 (PANTHER)	P:GO:0006508; F:GO:0008233	P:proteolysis; F:peptidase activity
SPF_FS5_contig_307	[INTERPRO, BLASTED, MAPPED, GO-SLIM]	tubulin alpha chain-like	514	15	1.01973e-82	99.54	7	P:GO:0000226; P:GO:0000278; F:GO:0003924; F:GO:0005200; F:GO:0005525; C:GO:0005737; C:GO:0005874	P:microtubule cytoskeleton organization; P:mitotic cell cycle; F:GTPase activity; F:structural constituent of cytoskeleton; F:GTP binding; C:cytoplasm; C:microtubule	EC:3.6.1.15	Nucleoside-triphosphate phosphatase	IPR002452 (PRINTS); IPR000217 (PRINTS); IPR003008 (PFAM); IPR036525 (G3DSA:3.40.50.GENE3D); IPR000217 (PANTHER); PTHR11588:SF75 (PANTHER); IPR036525 (SUPERFAMILY)	F:GO:0003924; F:GO:0005200; F:GO:0005525; C:GO:0005874; P:GO:0007017	F:GTPase activity; F:structural constituent of cytoskeleton; F:GTP binding; C:microtubule; P:microtubule-based process
SPF_FS5_contig_308	[INTERPRO, BLASTED, MAPPED, GO-SLIM]	tubulin alpha chain-like	435	15	7.40226e-81	99.73	7	P:GO:0000226; P:GO:0000278; F:GO:0003924; F:GO:0005200; F:GO:0005525; C:GO:0005737; C:GO:0005874	P:microtubule cytoskeleton organization; P:mitotic cell cycle; F:GTPase activity; F:structural constituent of cytoskeleton; F:GTP binding; C:cytoplasm; C:microtubule	EC:3.6.1.15	Nucleoside-triphosphate phosphatase	IPR000217 (PRINTS); IPR002452 (PRINTS); IPR003008 (PFAM); IPR036525 (G3DSA:3.40.50.GENE3D); PTHR11588:SF243 (PANTHER); IPR000217 (PANTHER); IPR036525 (SUPERFAMILY)	F:GO:0003924; F:GO:0005200; F:GO:0005525; C:GO:0005874; P:GO:0007017	F:GTPase activity; F:structural constituent of cytoskeleton; F:GTP binding; C:microtubule; P:microtubule-based process
SPF_FS5_contig_310	[INTERPRO, BLASTED, MAPPED, GO-SLIM]	40S ribosomal protein S15	571	15	1.12248e-58	91.97	5	P:GO:0000028; F:GO:0003723; F:GO:0003735; P:GO:0006412; C:GO:0022627	P:ribosomal small subunit assembly; F:RNA binding; F:structural constituent of ribosome; P:translation; C:cytosolic small ribosomal subunit			IPR002222 (PRINTS); IPR002222 (PFAM); IPR023575 (G3DSA:3.30.860.GENE3D); IPR005713 (TIGRFAM); IPR002222 (PIRSF); IPR002222 (PANTHER); PTHR11880:SF2 (PANTHER); IPR002222 (HAMAP); IPR023575 (SUPERFAMILY)	F:GO:0003735; C:GO:0005840; P:GO:0006412; C:GO:0015935	F:structural constituent of ribosome; C:ribosome; P:translation; C:small ribosomal subunit
SPF_FS5_contig_311	[INTERPRO, BLASTED, MAPPED, GO-SLIM]	tubulin alpha-1A chain-like	1635	15	0	98.53	7	P:GO:0000226; P:GO:0000278; F:GO:0003924; F:GO:0005200; F:GO:0005525; C:GO:0005737; C:GO:0005874	P:microtubule cytoskeleton organization; P:mitotic cell cycle; F:GTPase activity; F:structural constituent of cytoskeleton; F:GTP binding; C:cytoplasm; C:microtubule	EC:3.6.1.15	Nucleoside-triphosphate phosphatase	IPR002452 (PRINTS); IPR000217 (PRINTS); IPR018316 (SMART); IPR003008 (SMART); IPR037103 (G3DSA:3.30.1330.GENE3D); IPR018316 (PFAM); IPR003008 (PFAM); IPR036525 (G3DSA:3.40.50.GENE3D); IPR023123 (G3DSA:1.10.287.GENE3D); PTHR11588:SF237 (PANTHER); IPR000217 (PANTHER); cd02186 (CDD); IPR036525 (SUPERFAMILY); IPR008280 (SUPERFAMILY)	F:GO:0003924; F:GO:0005200; F:GO:0005525; C:GO:0005874; P:GO:0007017	F:GTPase activity; F:structural constituent of cytoskeleton; F:GTP binding; C:microtubule; P:microtubule-based process
SPF_FS5_contig_312	[INTERPRO, BLASTED, MAPPED, GO-SLIM]	60S ribosomal protein L8	842	15	3.91794e-132	90.97	8	P:GO:0002181; F:GO:0003735; P:GO:0006413; P:GO:0006614; C:GO:0014069; F:GO:0019843; C:GO:0022625; C:GO:0042788	P:cytoplasmic translation; F:structural constituent of ribosome; P:translational initiation; P:SRP-dependent cotranslational protein targeting to membrane; C:postsynaptic density; F:rRNA binding; C:cytosolic large ribosomal subunit; C:polysomal ribosome			IPR022669 (SMART); IPR002171 (SMART); IPR014722 (G3DSA:2.30.30.GENE3D); IPR022666 (PFAM); IPR014726 (G3DSA:4.10.950.GENE3D); IPR002171 (PIRSF); IPR022669 (PFAM); G3DSA:2.40.50.140 (GENE3D); mobidb-lite (MOBIDB_LITE); IPR002171 (PANTHER); PTHR13691:SF16 (PANTHER); IPR008991 (SUPERFAMILY); IPR012340 (SUPERFAMILY)	F:GO:0003735; C:GO:0005840; P:GO:0006412	F:structural constituent of ribosome; C:ribosome; P:translation
SPF_FS5_contig_316	[INTERPRO, BLASTED, MAPPED, GO-SLIM]	catalase	1772	15	0	83.92	5	P:GO:0006950; P:GO:0009056; F:GO:0016491; F:GO:0043167; P:GO:0051186	P:response to stress; P:catabolic process; F:oxidoreductase activity; F:ion binding; P:cofactor metabolic process	EC:1.11.1.7; EC:1.11.1.6	Peroxidase; Catalase	IPR018028 (PRINTS); IPR011614 (SMART); IPR024711 (PIRSF); IPR010582 (PFAM); IPR011614 (PFAM); IPR037060 (G3DSA:2.40.180.GENE3D); PTHR11465:SF9 (PANTHER); IPR018028 (PANTHER); IPR018028 (PROSITE_PROFILES); IPR040333 (CDD); IPR020835 (SUPERFAMILY)	F:GO:0004096; P:GO:0006979; F:GO:0020037; P:GO:0042744; P:GO:0055114	F:catalase activity; P:response to oxidative stress; F:heme binding; P:hydrogen peroxide catabolic process; P:oxidation-reduction process
SPF_FS5_contig_317	[INTERPRO, BLASTED, MAPPED, GO-SLIM]	nuclear receptor subfamily 2 group E member 1	1723	15	6.16902e-165	69.1	6	F:GO:0003700; F:GO:0003707; C:GO:0005634; P:GO:0006355; F:GO:0008270; F:GO:0043565	F:DNA-binding transcription factor activity; F:steroid hormone receptor activity; C:nucleus; P:regulation of transcription, DNA-templated; F:zinc ion binding; F:sequence-specific DNA binding			IPR001628 (PRINTS); IPR001723 (PRINTS); IPR001628 (SMART); IPR000536 (SMART); IPR000536 (PFAM); IPR013088 (G3DSA:3.30.50.GENE3D); IPR001628 (PFAM); G3DSA:1.10.565.10 (GENE3D); PTHR24083:SF98 (PANTHER); PTHR24083 (PANTHER); IPR001628 (PROSITE_PROFILES); IPR000536 (PROSITE_PROFILES); cd07163 (CDD); SSF57716 (SUPERFAMILY); IPR035500 (SUPERFAMILY)	F:GO:0003677; F:GO:0003700; F:GO:0003707; C:GO:0005634; P:GO:0006355; F:GO:0008270; F:GO:0043565	F:DNA binding; F:DNA-binding transcription factor activity; F:steroid hormone receptor activity; C:nucleus; P:regulation of transcription, DNA-templated; F:zinc ion binding; F:sequence-specific DNA binding
SPF_FS5_contig_318	[INTERPRO, BLASTED, MAPPED, GO-SLIM]	allene oxide synthase-lipoxygenase protein-like	2149	15	1.1926e-119	54.08	8	F:GO:0004096; F:GO:0005515; P:GO:0006629; P:GO:0009987; F:GO:0016702; F:GO:0020037; F:GO:0046872; P:GO:0055114	F:catalase activity; F:protein binding; P:lipid metabolic process; P:cellular process; F:oxidoreductase activity, acting on single donors with incorporation of molecular oxygen, incorporation of two atoms of oxygen; F:heme binding; F:metal ion binding; P:oxidation-reduction process			IPR013819 (PRINTS); IPR001024 (SMART); IPR013819 (PFAM); G3DSA:3.10.450.60 (GENE3D); G3DSA:1.20.245.10 (GENE3D); IPR001024 (PFAM); IPR037060 (G3DSA:2.40.180.GENE3D); IPR000907 (PANTHER); PTHR11771:SF88 (PANTHER); IPR013819 (PROSITE_PROFILES); IPR001024 (PROSITE_PROFILES); IPR036226 (SUPERFAMILY); IPR036392 (SUPERFAMILY)	F:GO:0004096; F:GO:0005515; F:GO:0016702; F:GO:0020037; F:GO:0046872; P:GO:0055114	F:catalase activity; F:protein binding; F:oxidoreductase activity, acting on single donors with incorporation of molecular oxygen, incorporation of two atoms of oxygen; F:heme binding; F:metal ion binding; P:oxidation-reduction process
SPF_FS5_contig_320	[INTERPRO, BLASTED, MAPPED, GO-SLIM]	glutamyl aminopeptidase-like	733	15	1.08387e-35	64.46	2	P:GO:0006508; F:GO:0070011	P:proteolysis; F:peptidase activity, acting on L-amino acid peptides			PF17900 (PFAM); G3DSA:2.60.40.1730 (GENE3D); PTHR11533:SF249 (PANTHER); IPR001930 (PANTHER); SSF63737 (SUPERFAMILY)	P:GO:0006508	P:proteolysis
SPF_FS5_contig_321	[INTERPRO, BLASTED, MAPPED, GO-SLIM]	fatty acid-binding protein, muscle	936	15	4.59697e-30	65.75	2	C:GO:0005737; F:GO:0008289	C:cytoplasm; F:lipid binding			IPR000463 (PRINTS); IPR012674 (G3DSA:2.40.128.GENE3D); IPR000566 (PFAM); IPR031259 (PANTHER); PTHR11955:SF92 (PANTHER); IPR012674 (SUPERFAMILY)	F:GO:0008289	F:lipid binding
SPF_FS5_contig_323	[BLASTED, MAPPED, ANNOTATED]	glycosylated lysosomal membrane protein A-like	2196	15	2.23769e-56	53.3	1	C:GO:0016020	C:membrane
SPF_FS5_contig_324	[BLASTED, MAPPED, ANNOTATED]	ganglioside GM2 activator-like	1094	15	2.37473e-34	58.73	3	P:GO:0006689; F:GO:0008047; P:GO:0043085	P:ganglioside catabolic process; F:enzyme activator activity; P:positive regulation of catalytic activity
SPF_FS5_contig_325	[INTERPRO, BLASTED, MAPPED, GO-SLIM]	cathepsin L1-like	738	15	2.75226e-121	86.45	4	F:GO:0004197; C:GO:0005615; C:GO:0005764; P:GO:0051603	F:cysteine-type endopeptidase activity; C:extracellular space; C:lysosome; P:proteolysis involved in cellular protein catabolic process	EC:3.4.22	Acting on peptide bonds (peptidases)	IPR000668 (SMART); IPR000668 (PFAM); G3DSA:3.90.70.10 (GENE3D); IPR013128 (PANTHER); PTHR12411:SF57 (PANTHER); IPR039417 (CDD); IPR038765 (SUPERFAMILY)	P:GO:0006508; F:GO:0008234	P:proteolysis; F:cysteine-type peptidase activity
SPF_FS5_contig_326	[INTERPRO, BLASTED, MAPPED, GO-SLIM]	antistasin-like isoform X2	926	15	8.14496e-12	54.67	6	F:GO:0004867; P:GO:0010951; C:GO:0016021; P:GO:0090090; P:GO:1990697; F:GO:1990699	F:serine-type endopeptidase inhibitor activity; P:negative regulation of endopeptidase activity; C:integral component of membrane; P:negative regulation of canonical Wnt signaling pathway; P:protein depalmitoleylation; F:palmitoleyl hydrolase activity	EC:3.1.1.1	Carboxylesterase	IPR004094 (PFAM); G3DSA:2.10.22.10 (GENE3D); IPR004094 (PROSITE_PROFILES); IPR011061 (SUPERFAMILY); IPR011061 (SUPERFAMILY)	F:GO:0004857; F:GO:0004867	F:enzyme inhibitor activity; F:serine-type endopeptidase inhibitor activity
SPF_FS5_contig_327	[INTERPRO, BLASTED, MAPPED, GO-SLIM]	60S ribosomal protein L26-like	975	15	1.24307e-62	91.61	3	F:GO:0003735; C:GO:0005840; P:GO:0006412	F:structural constituent of ribosome; C:ribosome; P:translation			IPR005824 (SMART); IPR005756 (PFAM); IPR014722 (G3DSA:2.30.30.GENE3D); IPR005756 (TIGRFAM); IPR005824 (PFAM); mobidb-lite (MOBIDB_LITE); PTHR11143:SF10 (PANTHER); IPR005756 (PANTHER); IPR005756 (HAMAP); cd06089 (CDD); IPR008991 (SUPERFAMILY)	F:GO:0003735; P:GO:0006412; C:GO:0015934	F:structural constituent of ribosome; P:translation; C:large ribosomal subunit
SPF_FS5_contig_329	[INTERPRO, BLASTED, MAPPED, GO-SLIM]	ubiquitin carboxyl-terminal hydrolase 10 isoform X2	4178	15	5.25067e-110	57.61	2	P:GO:0016579; F:GO:0036459	P:protein deubiquitination; F:thiol-dependent ubiquitinyl hydrolase activity			IPR001394 (PFAM); mobidb-lite (MOBIDB_LITE); mobidb-lite (MOBIDB_LITE); mobidb-lite (MOBIDB_LITE); mobidb-lite (MOBIDB_LITE); mobidb-lite (MOBIDB_LITE); PTHR44747 (PANTHER); IPR028889 (PROSITE_PROFILES); cd02257 (CDD); IPR038765 (SUPERFAMILY)	P:GO:0016579; F:GO:0036459	P:protein deubiquitination; F:thiol-dependent ubiquitinyl hydrolase activity
SPF_FS5_contig_330	[INTERPRO, BLASTED, MAPPED, GO-SLIM]	ATP-dependent RNA helicase SUV3 homolog, mitochondrial	3717	15	0	79.87	4	P:GO:0000965; F:GO:0003724; P:GO:0006401; C:GO:0045025	P:mitochondrial RNA 3'-end processing; F:RNA helicase activity; P:RNA catabolic process; C:mitochondrial degradosome	EC:3.6.1.3; EC:3.6.1.15	Adenosinetriphosphatase; Nucleoside-triphosphate phosphatase	IPR001650 (SMART); G3DSA:3.40.50.300 (GENE3D); IPR041453 (PFAM); IPR041082 (PFAM); G3DSA:1.20.272.40 (GENE3D); G3DSA:1.20.58.1080 (GENE3D); G3DSA:1.10.1740.140 (GENE3D); G3DSA:3.40.50.300 (GENE3D); IPR001650 (PFAM); IPR022192 (PFAM); mobidb-lite (MOBIDB_LITE); mobidb-lite (MOBIDB_LITE); mobidb-lite (MOBIDB_LITE); mobidb-lite (MOBIDB_LITE); mobidb-lite (MOBIDB_LITE); mobidb-lite (MOBIDB_LITE); mob…	F:GO:0016817	F:hydrolase activity, acting on acid anhydrides
SPF_FS5_contig_332	[INTERPRO, BLASTED, MAPPED, GO-SLIM]	40S ribosomal protein S27-like	563	15	1.41736e-52	97.71	5	P:GO:0000028; F:GO:0003735; P:GO:0006412; C:GO:0022627; F:GO:0046872	P:ribosomal small subunit assembly; F:structural constituent of ribosome; P:translation; C:cytosolic small ribosomal subunit; F:metal ion binding			IPR000592 (PFAM); G3DSA:2.20.25.640 (GENE3D); PTHR11594:SF2 (PANTHER); IPR000592 (PANTHER); IPR000592 (PRODOM); IPR000592 (HAMAP); IPR011332 (SUPERFAMILY)	F:GO:0003735; C:GO:0005622; C:GO:0005840; P:GO:0006412	F:structural constituent of ribosome; C:intracellular; C:ribosome; P:translation
SPF_FS5_contig_333	[INTERPRO, BLASTED, MAPPED, GO-SLIM]	elongation factor 1-alpha	1714	15	0	90.04	3	F:GO:0003924; F:GO:0008135; F:GO:0043167	F:GTPase activity; F:translation factor activity, RNA binding; F:ion binding	EC:3.6.1.15	Nucleoside-triphosphate phosphatase	IPR000795 (PRINTS); IPR004539 (TIGRFAM); G3DSA:3.40.50.300 (GENE3D); IPR000795 (PFAM); IPR004161 (PFAM); G3DSA:2.40.30.10 (GENE3D); G3DSA:2.40.30.10 (GENE3D); IPR004160 (PFAM); PTHR23115:SF228 (PANTHER); PTHR23115 (PANTHER); IPR000795 (PROSITE_PROFILES); cd03705 (CDD); cd03693 (CDD); cd01883 (CDD); IPR009001 (SUPERFAMILY); IPR027417 (SUPERFAMILY); IPR009000 (SUPERFAMILY)	F:GO:0003746; F:GO:0003924; F:GO:0005525; P:GO:0006414	F:translation elongation factor activity; F:GTPase activity; F:GTP binding; P:translational elongation
SPF_FS5_contig_335	[INTERPRO, BLASTED, MAPPED, GO-SLIM]	adhesion G-protein coupled receptor G7-like	2883	15	9.2367e-94	49.3	4	F:GO:0004930; P:GO:0007166; P:GO:0007186; C:GO:0016021	F:G protein-coupled receptor activity; P:cell surface receptor signaling pathway; P:G protein-coupled receptor signaling pathway; C:integral component of membrane			IPR000832 (PRINTS); IPR000203 (SMART); IPR000203 (PFAM); IPR000832 (PFAM); G3DSA:1.20.1070.10 (GENE3D); G3DSA:2.60.220.50 (GENE3D); PTHR12011:SF357 (PANTHER); PTHR12011 (PANTHER); IPR000203 (PROSITE_PROFILES); IPR017981 (PROSITE_PROFILES); cd15040 (CDD); SSF81321 (SUPERFAMILY)	F:GO:0004888; F:GO:0004930; P:GO:0007166; P:GO:0007186; C:GO:0016021	F:transmembrane signaling receptor activity; F:G protein-coupled receptor activity; P:cell surface receptor signaling pathway; P:G protein-coupled receptor signaling pathway; C:integral component of membrane
SPF_FS5_contig_336	[INTERPRO, BLASTED, MAPPED, GO-SLIM]	carboxypeptidase B	2015	15	7.08175e-94	55.68	3	F:GO:0004181; P:GO:0006508; F:GO:0008270	F:metallocarboxypeptidase activity; P:proteolysis; F:zinc ion binding			IPR000834 (PRINTS); IPR000834 (SMART); IPR000834 (PFAM); G3DSA:3.40.630.10 (GENE3D); IPR003146 (PFAM); IPR036990 (G3DSA:3.30.70.GENE3D); PTHR11705 (PANTHER); IPR034223 (CDD); SSF54897 (SUPERFAMILY); SSF53187 (SUPERFAMILY)	F:GO:0004180; F:GO:0004181; P:GO:0006508; F:GO:0008270	F:carboxypeptidase activity; F:metallocarboxypeptidase activity; P:proteolysis; F:zinc ion binding
SPF_FS5_contig_337	[INTERPRO, BLASTED, MAPPED, GO-SLIM]	UPF0505 protein C16orf62 homolog	3244	15	0	72.71	1	F:GO:0043167	F:ion binding			mobidb-lite (MOBIDB_LITE); IPR029705 (PANTHER); IPR016024 (SUPERFAMILY)	no GO terms	no GO terms
SPF_FS5_contig_342	[INTERPRO, BLASTED, MAPPED, GO-SLIM]	28S ribosomal protein S15, mitochondrial	866	15	5.42133e-18	60.34	3	F:GO:0003735; C:GO:0005840; P:GO:0006412	F:structural constituent of ribosome; C:ribosome; P:translation			IPR000589 (PFAM); G3DSA:1.10.287.10 (GENE3D); mobidb-lite (MOBIDB_LITE); IPR005290 (PANTHER); PD157043 (PRODOM); IPR009068 (SUPERFAMILY)	F:GO:0003735; C:GO:0005622; C:GO:0005840; P:GO:0006412	F:structural constituent of ribosome; C:intracellular; C:ribosome; P:translation
SPF_FS5_contig_344	[INTERPRO, BLASTED, MAPPED, GO-SLIM]	Cation-dependent mannose-6-phosphate receptor	2207	15	1.02384e-10	43.12	1	C:GO:0005575	C:cellular_component			IPR028927 (PFAM); mobidb-lite (MOBIDB_LITE)	no GO terms	no GO terms
SPF_FS5_contig_345	[INTERPRO, BLASTED, MAPPED, GO-SLIM]	40S ribosomal protein S18	897	15	6.1427e-81	95.37	6	F:GO:0003735; C:GO:0005829; C:GO:0005840; P:GO:0006412; F:GO:0019843; P:GO:0051726	F:structural constituent of ribosome; C:cytosol; C:ribosome; P:translation; F:rRNA binding; P:regulation of cell cycle			IPR001892 (PFAM); G3DSA:1.10.8.50 (GENE3D); IPR001892 (PIRSF); IPR027437 (G3DSA:4.10.910.GENE3D); mobidb-lite (MOBIDB_LITE); PTHR10871 (PANTHER); PTHR10871:SF19 (PANTHER); IPR001892 (PROSITE_PROFILES); IPR001892 (HAMAP); IPR010979 (SUPERFAMILY)	F:GO:0003676; F:GO:0003723; F:GO:0003735; C:GO:0005622; C:GO:0005840; P:GO:0006412	F:nucleic acid binding; F:RNA binding; F:structural constituent of ribosome; C:intracellular; C:ribosome; P:translation
SPF_FS5_contig_348	[INTERPRO, BLASTED, MAPPED, GO-SLIM]	eukaryotic translation initiation factor 3 subunit C-like isoform X1	3281	15	0	80.77	6	P:GO:0001732; F:GO:0003743; C:GO:0005852; C:GO:0016282; F:GO:0031369; C:GO:0033290	P:formation of cytoplasmic translation initiation complex; F:translation initiation factor activity; C:eukaryotic translation initiation factor 3 complex; C:eukaryotic 43S preinitiation complex; F:translation initiation factor binding; C:eukaryotic 48S preinitiation complex			IPR000717 (SMART); SM00753 (SMART); IPR000717 (PFAM); IPR008905 (PFAM); mobidb-lite (MOBIDB_LITE); mobidb-lite (MOBIDB_LITE); mobidb-lite (MOBIDB_LITE); mobidb-lite (MOBIDB_LITE); mobidb-lite (MOBIDB_LITE); mobidb-lite (MOBIDB_LITE); mobidb-lite (MOBIDB_LITE); mobidb-lite (MOBIDB_LITE); IPR027516 (PANTHER); PTHR13937:SF0 (PANTHER); IPR027516 (HAMAP); IPR000717 (PROSITE_PROFILES); IPR036390 (SUPER…	F:GO:0003723; F:GO:0003743; C:GO:0005852; P:GO:0006413; F:GO:0031369	F:RNA binding; F:translation initiation factor activity; C:eukaryotic translation initiation factor 3 complex; P:translational initiation; F:translation initiation factor binding
SPF_FS5_contig_350	[INTERPRO, BLASTED, MAPPED, GO-SLIM]	Serine/threonine-protein kinase pim-3	2995	15	1.20249e-119	80.65	4	F:GO:0004674; F:GO:0005524; P:GO:0006468; P:GO:0043066	F:protein serine/threonine kinase activity; F:ATP binding; P:protein phosphorylation; P:negative regulation of apoptotic process	EC:2.7.11	Transferring phosphorus-containing groups	IPR000719 (SMART); IPR017348 (PIRSF); G3DSA:1.10.510.10 (GENE3D); G3DSA:3.30.200.20 (GENE3D); IPR000719 (PFAM); PTHR22984:SF9 (PANTHER); PTHR22984 (PANTHER); IPR000719 (PROSITE_PROFILES); cd14005 (CDD); IPR011009 (SUPERFAMILY)	F:GO:0004672; F:GO:0004674; F:GO:0005524; P:GO:0006468; P:GO:0043066	F:protein kinase activity; F:protein serine/threonine kinase activity; F:ATP binding; P:protein phosphorylation; P:negative regulation of apoptotic process
SPF_FS5_contig_352	[INTERPRO, BLASTED, MAPPED, GO-SLIM]	cytochrome oxidase subunit I (mitochondrion)	538	15	1.46067e-77	92.32	10	F:GO:0004129; C:GO:0005743; P:GO:0006119; P:GO:0009060; C:GO:0016021; F:GO:0020037; P:GO:0022900; C:GO:0045277; F:GO:0046872; P:GO:1902600	F:cytochrome-c oxidase activity; C:mitochondrial inner membrane; P:oxidative phosphorylation; P:aerobic respiration; C:integral component of membrane; F:heme binding; P:electron transport chain; C:respiratory chain complex IV; F:metal ion binding; P:proton transmembrane transport	EC:1.9.3.1	Cytochrome-c oxidase	IPR000883 (PRINTS); IPR036927 (G3DSA:1.20.210.GENE3D); IPR000883 (PFAM); PTHR10422:SF18 (PANTHER); IPR000883 (PANTHER); IPR023616 (PROSITE_PROFILES); IPR036927 (SUPERFAMILY)	F:GO:0004129; P:GO:0009060; C:GO:0016021; F:GO:0020037; P:GO:0055114	F:cytochrome-c oxidase activity; P:aerobic respiration; C:integral component of membrane; F:heme binding; P:oxidation-reduction process
SPF_FS5_contig_353	[INTERPRO, BLASTED, MAPPED, GO-SLIM]	cytochrome c oxidase subunit I (mitochondrion)	475	15	6.58029e-81	91.26	10	F:GO:0004129; C:GO:0005743; P:GO:0006119; P:GO:0009060; C:GO:0016021; F:GO:0020037; P:GO:0022900; C:GO:0045277; F:GO:0046872; P:GO:1902600	F:cytochrome-c oxidase activity; C:mitochondrial inner membrane; P:oxidative phosphorylation; P:aerobic respiration; C:integral component of membrane; F:heme binding; P:electron transport chain; C:respiratory chain complex IV; F:metal ion binding; P:proton transmembrane transport	EC:1.9.3.1	Cytochrome-c oxidase	IPR036927 (G3DSA:1.20.210.GENE3D); IPR000883 (PANTHER); IPR023616 (PROSITE_PROFILES); IPR036927 (SUPERFAMILY)	F:GO:0004129; P:GO:0009060; C:GO:0016021; F:GO:0020037; P:GO:0055114	F:cytochrome-c oxidase activity; P:aerobic respiration; C:integral component of membrane; F:heme binding; P:oxidation-reduction process
SPF_FS5_contig_354	[INTERPRO, BLASTED, MAPPED, GO-SLIM]	integrin-linked kinase-associated serine/threonine phosphatase 2C isoform X3	1007	15	1.94205e-81	71.91	3	F:GO:0004722; P:GO:0006470; F:GO:0043169	F:protein serine/threonine phosphatase activity; P:protein dephosphorylation; F:cation binding	EC:3.1.3.16	Protein-serine/threonine phosphatase	IPR001932 (SMART); IPR036457 (G3DSA:3.60.40.GENE3D); IPR001932 (PFAM); mobidb-lite (MOBIDB_LITE); IPR015655 (PANTHER); PTHR13832:SF348 (PANTHER); IPR001932 (PROSITE_PROFILES); IPR001932 (CDD); IPR036457 (SUPERFAMILY)	F:GO:0003824; F:GO:0004722; P:GO:0006470	F:catalytic activity; F:protein serine/threonine phosphatase activity; P:protein dephosphorylation
SPF_FS5_contig_355	[INTERPRO, BLASTED, MAPPED, GO-SLIM]	disco-interacting protein 2 homolog C isoform X3	5857	15	0	80.14	1	F:GO:0003674	F:molecular_function			IPR010506 (SMART); G3DSA:3.40.50.12780 (GENE3D); IPR000873 (PFAM); G3DSA:3.40.50.12780 (GENE3D); IPR010506 (PFAM); G3DSA:3.30.300.30 (GENE3D); mobidb-lite (MOBIDB_LITE); mobidb-lite (MOBIDB_LITE); mobidb-lite (MOBIDB_LITE); mobidb-lite (MOBIDB_LITE); PTHR42665:SF2 (PANTHER); PTHR42665 (PANTHER); SSF56801 (SUPERFAMILY); SSF56801 (SUPERFAMILY)	F:GO:0003824	F:catalytic activity
SPF_FS5_contig_356	[INTERPRO, BLASTED, MAPPED, GO-SLIM]	Surfeit locus protein 4 homolog	1622	15	8.42677e-96	76.82	1	C:GO:0016021	C:integral component of membrane			IPR002995 (PFAM); PTHR23427:SF1 (PANTHER); PTHR23427 (PANTHER)	C:GO:0016021	C:integral component of membrane
SPF_FS5_contig_358	[INTERPRO, BLASTED, MAPPED, GO-SLIM]	40S ribosomal protein S7	1161	15	1.12965e-99	92.31	3	F:GO:0003735; C:GO:0005840; P:GO:0006412	F:structural constituent of ribosome; C:ribosome; P:translation			IPR000554 (PFAM); IPR000554 (PANTHER); PTHR11278:SF0 (PANTHER)	F:GO:0003735; C:GO:0005622; C:GO:0005840; P:GO:0006412	F:structural constituent of ribosome; C:intracellular; C:ribosome; P:translation
SPF_FS5_contig_360	[INTERPRO, BLASTED, MAPPED, GO-SLIM]	myosin heavy chain, non-muscle isoform X1	5983	15	0	80.6	4	F:GO:0003774; F:GO:0005524; C:GO:0016459; F:GO:0051015	F:motor activity; F:ATP binding; C:myosin complex; F:actin filament binding	EC:3.6.1.15	Nucleoside-triphosphate phosphatase	IPR001609 (PRINTS); IPR000048 (SMART); IPR001609 (SMART); IPR001609 (PFAM); G3DSA:1.20.5.1050 (GENE3D); IPR027401 (G3DSA:4.10.270.GENE3D); IPR008989 (G3DSA:2.30.30.GENE3D); G3DSA:1.20.120.720 (GENE3D); G3DSA:1.20.58.530 (GENE3D); IPR002928 (PFAM); G3DSA:3.30.70.3240 (GENE3D); IPR004009 (PFAM); IPR036961 (G3DSA:3.40.850.GENE3D); mobidb-lite (MOBIDB_LITE); mobidb-lite (MOBIDB_LITE); mobidb-lite (MO…	F:GO:0003774; F:GO:0005515; F:GO:0005524; C:GO:0016459; F:GO:0051015	F:motor activity; F:protein binding; F:ATP binding; C:myosin complex; F:actin filament binding
SPF_FS5_contig_361	[INTERPRO, BLASTED, MAPPED, GO-SLIM]	nucleolin-like isoform X3	2599	15	2.29285e-64	56.76	3	F:GO:0003723; P:GO:0010467; P:GO:0016070	F:RNA binding; P:gene expression; P:RNA metabolic process			IPR000504 (SMART); IPR000504 (PFAM); IPR012677 (G3DSA:3.30.70.GENE3D); IPR012677 (G3DSA:3.30.70.GENE3D); IPR012677 (G3DSA:3.30.70.GENE3D); mobidb-lite (MOBIDB_LITE); mobidb-lite (MOBIDB_LITE); mobidb-lite (MOBIDB_LITE); mobidb-lite (MOBIDB_LITE); mobidb-lite (MOBIDB_LITE); PTHR44769 (PANTHER); IPR000504 (PROSITE_PROFILES); IPR000504 (PROSITE_PROFILES); IPR000504 (PROSITE_PROFILES); cd00590 (CDD);…	F:GO:0003676	F:nucleic acid binding
SPF_FS5_contig_362	[INTERPRO, BLASTED, MAPPED, GO-SLIM]	60S ribosomal protein L12	792	15	5.85694e-81	90.14	5	P:GO:0000027; F:GO:0003735; P:GO:0006412; C:GO:0022625; F:GO:0070180	P:ribosomal large subunit assembly; F:structural constituent of ribosome; P:translation; C:cytosolic large ribosomal subunit; F:large ribosomal subunit rRNA binding			IPR000911 (SMART); IPR036796 (G3DSA:3.30.1550.GENE3D); IPR020783 (PFAM); IPR036769 (G3DSA:1.10.10.GENE3D); IPR020784 (PFAM); PTHR11661:SF2 (PANTHER); IPR000911 (PANTHER); IPR000911 (HAMAP); IPR000911 (CDD); IPR036769 (SUPERFAMILY); IPR036796 (SUPERFAMILY)	F:GO:0003735; C:GO:0005840; P:GO:0006412	F:structural constituent of ribosome; C:ribosome; P:translation
SPF_FS5_contig_363	[INTERPRO, BLASTED, MAPPED, GO-SLIM]	xaa-Pro aminopeptidase 1 isoform X2	2705	15	0	64.32	1	F:GO:0070006	F:metalloaminopeptidase activity			IPR029149 (G3DSA:3.40.350.GENE3D); IPR032416 (PFAM); PF16189 (PFAM); IPR000587 (PFAM); IPR000994 (PFAM); G3DSA:3.90.230.10 (GENE3D); IPR029149 (G3DSA:3.40.350.GENE3D); PTHR43763 (PANTHER); IPR033740 (CDD); IPR029149 (SUPERFAMILY); IPR036005 (SUPERFAMILY); IPR029149 (SUPERFAMILY)	F:GO:0016787; F:GO:0070006	F:hydrolase activity; F:metalloaminopeptidase activity
SPF_FS5_contig_364	[INTERPRO, BLASTED, MAPPED, GO-SLIM]	la-related protein CG11505 isoform X2	4942	15	1.4292e-61	76.82	1	F:GO:0003723	F:RNA binding			IPR000504 (SMART); IPR006630 (SMART); IPR036388 (G3DSA:1.10.10.GENE3D); IPR006630 (PFAM); mobidb-lite (MOBIDB_LITE); mobidb-lite (MOBIDB_LITE); mobidb-lite (MOBIDB_LITE); mobidb-lite (MOBIDB_LITE); mobidb-lite (MOBIDB_LITE); mobidb-lite (MOBIDB_LITE); PTHR22792 (PANTHER); PTHR22792:SF97 (PANTHER); IPR006630 (PROSITE_PROFILES); cd12430 (CDD); cd08031 (CDD); IPR035979 (SUPERFAMILY); IPR036390 (SUPE…	F:GO:0003676	F:nucleic acid binding
SPF_FS5_contig_365	[INTERPRO, BLASTED, MAPPED, GO-SLIM]	pre-mRNA 3' end processing protein WDR33 isoform X1	3228	15	0	78.5	3	F:GO:0005515; C:GO:0005847; P:GO:0006378	F:protein binding; C:mRNA cleavage and polyadenylation specificity factor complex; P:mRNA polyadenylation			IPR001680 (SMART); IPR015943 (G3DSA:2.130.10.GENE3D); IPR001680 (PFAM); IPR015943 (G3DSA:2.130.10.GENE3D); mobidb-lite (MOBIDB_LITE); mobidb-lite (MOBIDB_LITE); mobidb-lite (MOBIDB_LITE); mobidb-lite (MOBIDB_LITE); mobidb-lite (MOBIDB_LITE); mobidb-lite (MOBIDB_LITE); mobidb-lite (MOBIDB_LITE); mobidb-lite (MOBIDB_LITE); mobidb-lite (MOBIDB_LITE); mobidb-lite (MOBIDB_LITE); PTHR22836 (PANTHER); I…	F:GO:0005515	F:protein binding
SPF_FS5_contig_368	[INTERPRO, BLASTED, MAPPED, GO-SLIM]	V-type proton ATPase subunit D	1389	15	7.61925e-100	84.67	8	F:GO:0005515; C:GO:0005813; C:GO:0005929; C:GO:0033176; F:GO:0046961; P:GO:0060271; P:GO:0061512; P:GO:1902600	F:protein binding; C:centrosome; C:cilium; C:proton-transporting V-type ATPase complex; F:proton-transporting ATPase activity, rotational mechanism; P:cilium assembly; P:protein localization to cilium; P:proton transmembrane transport	EC:3.6.1.3; EC:3.6.1.15	Adenosinetriphosphatase; Nucleoside-triphosphate phosphatase	IPR002699 (PFAM); IPR002699 (TIGRFAM); IPR002699 (PANTHER)	F:GO:0042626	F:ATPase-coupled transmembrane transporter activity
SPF_FS5_contig_369	[INTERPRO, BLASTED, MAPPED, GO-SLIM]	aldose reductase isoform X2	1369	15	9.8823e-107	66.87	1	F:GO:0016491	F:oxidoreductase activity			IPR020471 (PRINTS); IPR020471 (PIRSF); IPR036812 (G3DSA:3.20.20.GENE3D); IPR023210 (PFAM); IPR020471 (PANTHER); PTHR11732:SF312 (PANTHER); IPR023210 (CDD); IPR036812 (SUPERFAMILY)	F:GO:0016491; P:GO:0055114	F:oxidoreductase activity; P:oxidation-reduction process
SPF_FS5_contig_370	[INTERPRO, BLASTED, MAPPED, GO-SLIM]	TAR DNA-binding protein 43 isoform X4	1950	15	3.04969e-117	76.54	1	F:GO:0003674	F:molecular_function			IPR000504 (SMART); IPR041105 (PFAM); IPR000504 (PFAM); IPR012677 (G3DSA:3.30.70.GENE3D); IPR012677 (G3DSA:3.30.70.GENE3D); mobidb-lite (MOBIDB_LITE); mobidb-lite (MOBIDB_LITE); mobidb-lite (MOBIDB_LITE); mobidb-lite (MOBIDB_LITE); PTHR44166 (PANTHER); IPR000504 (PROSITE_PROFILES); IPR000504 (PROSITE_PROFILES); cd12321 (CDD); cd12322 (CDD); IPR035979 (SUPERFAMILY); IPR035979 (SUPERFAMILY)	F:GO:0003676	F:nucleic acid binding
SPF_FS5_contig_371	[INTERPRO, BLASTED, MAPPED, GO-SLIM]	adenylate kinase 9-like isoform X1	6125	15	0	77.98	3	F:GO:0016301; P:GO:0034641; F:GO:0043167	F:kinase activity; P:cellular nitrogen compound metabolic process; F:ion binding			IPR003593 (SMART); PF00406 (PFAM); IPR033768 (PFAM); PF00406 (PFAM); IPR021897 (PFAM); G3DSA:3.40.50.300 (GENE3D); G3DSA:3.40.50.300 (GENE3D); mobidb-lite (MOBIDB_LITE); mobidb-lite (MOBIDB_LITE); mobidb-lite (MOBIDB_LITE); mobidb-lite (MOBIDB_LITE); mobidb-lite (MOBIDB_LITE); mobidb-lite (MOBIDB_LITE); mobidb-lite (MOBIDB_LITE); mobidb-lite (MOBIDB_LITE); mobidb-lite (MOBIDB_LITE); mobidb-lite (…	F:GO:0005524; P:GO:0006139; F:GO:0019205	F:ATP binding; P:nucleobase-containing compound metabolic process; F:nucleobase-containing compound kinase activity
SPF_FS5_contig_373	[INTERPRO, BLASTED, MAPPED, GO-SLIM]	heterogeneous nuclear ribonucleoprotein Q	2673	15	0	79.72	1	F:GO:0003723	F:RNA binding			IPR000504 (SMART); IPR012677 (G3DSA:3.30.70.GENE3D); IPR006535 (TIGRFAM); IPR012677 (G3DSA:3.30.70.GENE3D); IPR000504 (PFAM); IPR012677 (G3DSA:3.30.70.GENE3D); IPR041337 (PFAM); mobidb-lite (MOBIDB_LITE); mobidb-lite (MOBIDB_LITE); mobidb-lite (MOBIDB_LITE); mobidb-lite (MOBIDB_LITE); PTHR44088 (PANTHER); PTHR44088:SF1 (PANTHER); IPR000504 (PROSITE_PROFILES); IPR000504 (PROSITE_PROFILES); IPR0005…	F:GO:0003676	F:nucleic acid binding
SPF_FS5_contig_374	[INTERPRO, BLASTED, MAPPED, GO-SLIM]	guanine nucleotide-binding protein G(o) subunit alpha-like	1557	15	0	83.69	7	F:GO:0001664; F:GO:0003924; F:GO:0005525; C:GO:0005834; P:GO:0007188; P:GO:0007266; F:GO:0031683	F:G protein-coupled receptor binding; F:GTPase activity; F:GTP binding; C:heterotrimeric G-protein complex; P:adenylate cyclase-modulating G protein-coupled receptor signaling pathway; P:Rho protein signal transduction; F:G-protein beta/gamma-subunit complex binding	EC:3.6.1.15	Nucleoside-triphosphate phosphatase	IPR001019 (PRINTS); IPR001019 (SMART); G3DSA:3.40.50.300 (GENE3D); IPR001019 (PFAM); IPR011025 (G3DSA:1.10.400.GENE3D); IPR001019 (PANTHER); PTHR10218:SF231 (PANTHER); IPR001019 (CDD); IPR027417 (SUPERFAMILY); IPR011025 (SUPERFAMILY)	F:GO:0003924; P:GO:0007165; P:GO:0007186; F:GO:0019001; F:GO:0031683	F:GTPase activity; P:signal transduction; P:G protein-coupled receptor signaling pathway; F:guanyl nucleotide binding; F:G-protein beta/gamma-subunit complex binding
SPF_FS5_contig_375	[INTERPRO, BLASTED, MAPPED, GO-SLIM]	eukaryotic translation initiation factor 5	1978	15	8.83246e-158	70.33	3	F:GO:0003743; F:GO:0005515; P:GO:0006413	F:translation initiation factor activity; F:protein binding; P:translational initiation			IPR002735 (SMART); IPR003307 (SMART); IPR002735 (PFAM); IPR003307 (PFAM); G3DSA:3.30.30.50 (GENE3D); G3DSA:2.20.25.350 (GENE3D); IPR016021 (G3DSA:1.25.40.GENE3D); mobidb-lite (MOBIDB_LITE); mobidb-lite (MOBIDB_LITE); mobidb-lite (MOBIDB_LITE); mobidb-lite (MOBIDB_LITE); mobidb-lite (MOBIDB_LITE); PTHR23001 (PANTHER); PTHR23001:SF7 (PANTHER); IPR003307 (PROSITE_PROFILES); cd11561 (CDD); IPR016190 …	F:GO:0003743; F:GO:0005515; P:GO:0006413	F:translation initiation factor activity; F:protein binding; P:translational initiation
SPF_FS5_contig_377	[INTERPRO, BLASTED, MAPPED, GO-SLIM]	DDB1- and CUL4-associated factor 7	2847	15	0	93.58	3	F:GO:0005515; C:GO:0005634; C:GO:0016021	F:protein binding; C:nucleus; C:integral component of membrane			IPR001680 (SMART); IPR015943 (G3DSA:2.130.10.GENE3D); IPR001680 (PFAM); PTHR19919 (PANTHER); IPR017986 (PROSITE_PROFILES); IPR001680 (PROSITE_PROFILES); IPR036322 (SUPERFAMILY)	F:GO:0005515	F:protein binding
SPF_FS5_contig_378	[INTERPRO, BLASTED, MAPPED, GO-SLIM]	tolloid-like protein 1	2925	15	0	76.89	2	F:GO:0008233; F:GO:0043167	F:peptidase activity; F:ion binding	EC:3.4.24	Acting on peptide bonds (peptidases)	IPR000742 (SMART); IPR000859 (SMART); IPR001881 (SMART); PF14670 (PFAM); G3DSA:2.10.25.10 (GENE3D); IPR035914 (G3DSA:2.60.120.GENE3D); IPR000859 (PFAM); IPR035914 (G3DSA:2.60.120.GENE3D); IPR015446 (PIRSF); IPR001881 (PFAM); mobidb-lite (MOBIDB_LITE); mobidb-lite (MOBIDB_LITE); PTHR43978 (PANTHER); IPR000859 (PROSITE_PROFILES); IPR000859 (PROSITE_PROFILES); IPR000859 (PROSITE_PROFILES); IPR000742…	F:GO:0004222; F:GO:0005509	F:metalloendopeptidase activity; F:calcium ion binding
SPF_FS5_contig_379	[INTERPRO, BLASTED, MAPPED, GO-SLIM]	ADP-ribosylation factor-like protein 6-interacting protein 1	1550	15	1.86112e-25	55.78	1	C:GO:0005575	C:cellular_component			mobidb-lite (MOBIDB_LITE); PTHR20952:SF0 (PANTHER); PTHR20952 (PANTHER)	no GO terms	no GO terms
SPF_FS5_contig_380	[INTERPRO, BLASTED, MAPPED, GO-SLIM]	ferritin	716	15	4.34757e-87	89.82	5	C:GO:0005737; P:GO:0006810; F:GO:0016491; P:GO:0042592; F:GO:0043167	C:cytoplasm; P:transport; F:oxidoreductase activity; P:homeostatic process; F:ion binding	EC:1.16.3.1; EC:1.16.3	Ferroxidase; Oxidizing metal ions	IPR008331 (PFAM); IPR012347 (G3DSA:1.20.1260.GENE3D); PTHR11431:SF55 (PANTHER); IPR001519 (PANTHER); IPR009040 (PROSITE_PROFILES); cd01056 (CDD); IPR009078 (SUPERFAMILY)	P:GO:0006826; P:GO:0006879; F:GO:0008199	P:iron ion transport; P:cellular iron ion homeostasis; F:ferric iron binding
SPF_FS5_contig_381	[INTERPRO, BLASTED, MAPPED, GO-SLIM]	receptor-type tyrosine-protein phosphatase epsilon isoform X1	3782	15	1.33831e-171	61.45	2	F:GO:0004725; P:GO:0006470	F:protein tyrosine phosphatase activity; P:protein dephosphorylation			IPR000242 (PRINTS); IPR003595 (SMART); IPR000242 (SMART); IPR000242 (PFAM); IPR029021 (G3DSA:3.90.190.GENE3D); IPR029021 (G3DSA:3.90.190.GENE3D); mobidb-lite (MOBIDB_LITE); mobidb-lite (MOBIDB_LITE); mobidb-lite (MOBIDB_LITE); PTHR19134 (PANTHER); PTHR19134:SF447 (PANTHER); IPR000242 (PROSITE_PROFILES); IPR000387 (PROSITE_PROFILES); IPR000387 (PROSITE_PROFILES); IPR000242 (PROSITE_PROFILES); cd00…	F:GO:0004725; P:GO:0006470; P:GO:0016311; F:GO:0016791	F:protein tyrosine phosphatase activity; P:protein dephosphorylation; P:dephosphorylation; F:phosphatase activity
SPF_FS5_contig_382	[INTERPRO, BLASTED, MAPPED, GO-SLIM]	ATP synthase subunit gamma, mitochondrial-like	1052	15	3.74332e-113	79.59	7	C:GO:0005622; P:GO:0009058; F:GO:0016887; F:GO:0022857; C:GO:0032991; P:GO:0034641; P:GO:0044281	C:intracellular; P:biosynthetic process; F:ATPase activity; F:transmembrane transporter activity; C:protein-containing complex; P:cellular nitrogen compound metabolic process; P:small molecule metabolic process	EC:3.6.1.3; EC:3.6.1.15	Adenosinetriphosphatase; Nucleoside-triphosphate phosphatase	IPR000131 (PRINTS); G3DSA:1.10.287.80 (GENE3D); G3DSA:3.40.1380.10 (GENE3D); PIRSF039089 (PIRSF); IPR000131 (PFAM); IPR000131 (TIGRFAM); G3DSA:1.10.287.80 (GENE3D); IPR000131 (PANTHER); PTHR11693:SF22 (PANTHER); IPR000131 (CDD); IPR035968 (SUPERFAMILY)	P:GO:0015986; C:GO:0045261; F:GO:0046933	P:ATP synthesis coupled proton transport; C:proton-transporting ATP synthase complex, catalytic core F(1); F:proton-transporting ATP synthase activity, rotational mechanism
SPF_FS5_contig_384	[INTERPRO, BLASTED, MAPPED, GO-SLIM]	casein kinase I isoform X5	1491	15	0	92.65	3	F:GO:0004674; F:GO:0005524; P:GO:0006468	F:protein serine/threonine kinase activity; F:ATP binding; P:protein phosphorylation	EC:2.7.11	Transferring phosphorus-containing groups	IPR000719 (SMART); G3DSA:1.10.510.10 (GENE3D); IPR000719 (PFAM); PTHR11909:SF84 (PANTHER); PTHR11909 (PANTHER); IPR000719 (PROSITE_PROFILES); cd14128 (CDD); IPR011009 (SUPERFAMILY)	F:GO:0004672; F:GO:0005524; P:GO:0006468	F:protein kinase activity; F:ATP binding; P:protein phosphorylation
SPF_FS5_contig_385	[INTERPRO, BLASTED, MAPPED, GO-SLIM]	peptidase	907	15	1.1916e-17	46.57	1	F:GO:0003674	F:molecular_function			G3DSA:3.10.450.490 (GENE3D); G3DSA:3.10.450.40 (GENE3D); IPR011096 (PFAM)	no GO terms	no GO terms
SPF_FS5_contig_386	[INTERPRO, BLASTED, MAPPED, GO-SLIM]	sodium/glucose cotransporter 4-like	2585	15	0	68.15	3	C:GO:0016021; F:GO:0022857; P:GO:0055085	C:integral component of membrane; F:transmembrane transporter activity; P:transmembrane transport			IPR001734 (TIGRFAM); IPR001734 (PFAM); IPR038377 (G3DSA:1.20.1730.GENE3D); mobidb-lite (MOBIDB_LITE); mobidb-lite (MOBIDB_LITE); mobidb-lite (MOBIDB_LITE); mobidb-lite (MOBIDB_LITE); PTHR11819:SF145 (PANTHER); PTHR11819 (PANTHER); PTHR11819 (PANTHER); PTHR11819:SF145 (PANTHER); IPR001734 (PROSITE_PROFILES); cd10329 (CDD)	C:GO:0016020; F:GO:0022857; P:GO:0055085	C:membrane; F:transmembrane transporter activity; P:transmembrane transport
SPF_FS5_contig_387	[BLASTED, MAPPED, ANNOTATED]	nuclear factor related to kappa-B-binding protein-like	4827	15	2.99408e-112	62.41	1	C:GO:0031011	C:Ino80 complex
SPF_FS5_contig_391	[INTERPRO, BLASTED, MAPPED, GO-SLIM]	probable LRR receptor-like protein kinase At1g51890	3889	15	2.57025e-18	53.94	3	F:GO:0004672; F:GO:0005524; P:GO:0006468	F:protein kinase activity; F:ATP binding; P:protein phosphorylation			IPR000719 (SMART); G3DSA:1.10.510.10 (GENE3D); IPR000719 (PFAM); PTHR27001 (PANTHER); IPR000719 (PROSITE_PROFILES); IPR011009 (SUPERFAMILY)	F:GO:0004672; F:GO:0005524; P:GO:0006468	F:protein kinase activity; F:ATP binding; P:protein phosphorylation
SPF_FS5_contig_393	[INTERPRO, BLASTED, MAPPED, GO-SLIM]	myosin heavy chain isoform A	4626	15	0	79.02	4	F:GO:0003774; F:GO:0005524; C:GO:0016459; F:GO:0051015	F:motor activity; F:ATP binding; C:myosin complex; F:actin filament binding	EC:3.6.1.15	Nucleoside-triphosphate phosphatase	IPR001609 (SMART); IPR001609 (PFAM); G3DSA:1.20.5.370 (GENE3D); G3DSA:1.20.5.370 (GENE3D); G3DSA:1.20.58.530 (GENE3D); IPR036961 (G3DSA:3.40.850.GENE3D); G3DSA:1.20.5.1050 (GENE3D); IPR002928 (PFAM); IPR027401 (G3DSA:4.10.270.GENE3D); G3DSA:3.30.70.1590 (GENE3D); mobidb-lite (MOBIDB_LITE); mobidb-lite (MOBIDB_LITE); mobidb-lite (MOBIDB_LITE); mobidb-lite (MOBIDB_LITE); PTHR13140 (PANTHER); PTHR13…	F:GO:0003774; F:GO:0005515; F:GO:0005524; C:GO:0016459	F:motor activity; F:protein binding; F:ATP binding; C:myosin complex
SPF_FS5_contig_394	[INTERPRO, BLASTED, MAPPED, GO-SLIM]	tRNA (adenine(58)-N(1))-methyltransferase non-catalytic subunit TRM6-like	2073	15	7.50028e-91	57.78	2	P:GO:0030488; C:GO:0031515	P:tRNA methylation; C:tRNA (m1A) methyltransferase complex			IPR017423 (PFAM); IPR017423 (PANTHER)	P:GO:0030488; C:GO:0031515	P:tRNA methylation; C:tRNA (m1A) methyltransferase complex
SPF_FS5_contig_399	[INTERPRO, BLASTED, MAPPED, GO-SLIM]	calponin-like protein-1	1626	15	8.97885e-135	70.63	1	F:GO:0003674	F:molecular_function			IPR003096 (PRINTS); IPR001715 (SMART); IPR036872 (G3DSA:1.10.418.GENE3D); IPR000557 (PFAM); IPR001715 (PFAM); PTHR18959:SF83 (PANTHER); PTHR18959 (PANTHER); PTHR18959:SF83 (PANTHER); IPR000557 (PROSITE_PROFILES); IPR000557 (PROSITE_PROFILES); IPR000557 (PROSITE_PROFILES); IPR000557 (PROSITE_PROFILES); IPR000557 (PROSITE_PROFILES); IPR001715 (PROSITE_PROFILES); IPR001715 (CDD); IPR036872 (SUPERFAM…	F:GO:0005515	F:protein binding
SPF_FS5_contig_400	[INTERPRO, BLASTED, MAPPED, GO-SLIM]	peptidase	1917	15	1.40813e-114	58.62	2	F:GO:0004222; P:GO:0006508	F:metalloendopeptidase activity; P:proteolysis			IPR023612 (PRINTS); G3DSA:3.10.450.40 (GENE3D); IPR013856 (PFAM); IPR027268 (G3DSA:1.10.390.GENE3D); IPR001570 (PFAM); IPR011096 (PFAM); G3DSA:3.10.170.10 (GENE3D); PTHR33794:SF1 (PANTHER); PTHR33794 (PANTHER); IPR023612 (CDD); SSF55486 (SUPERFAMILY)	F:GO:0004222; P:GO:0006508	F:metalloendopeptidase activity; P:proteolysis
SPF_FS5_contig_401	[INTERPRO, BLASTED, MAPPED, GO-SLIM]	transcription factor MafF	1524	15	1.16549e-09	59.46	7	F:GO:0000981; F:GO:0005515; C:GO:0005634; C:GO:0005739; P:GO:0032501; F:GO:0043565; P:GO:0045944	F:DNA-binding transcription factor activity, RNA polymerase II-specific; F:protein binding; C:nucleus; C:mitochondrion; P:multicellular organismal process; F:sequence-specific DNA binding; P:positive regulation of transcription by RNA polymerase II			G3DSA:1.20.5.170 (GENE3D); IPR004826 (PFAM); mobidb-lite (MOBIDB_LITE); mobidb-lite (MOBIDB_LITE); IPR024874 (PANTHER); IPR004827 (PROSITE_PROFILES); IPR008917 (SUPERFAMILY)	F:GO:0003677; F:GO:0003700; C:GO:0005634; P:GO:0006355	F:DNA binding; F:DNA-binding transcription factor activity; C:nucleus; P:regulation of transcription, DNA-templated
SPF_FS5_contig_405	[INTERPRO, BLASTED, MAPPED, GO-SLIM]	myelin regulatory factor isoform X1	4693	15	3.68926e-138	64.58	5	F:GO:0003677; F:GO:0003700; C:GO:0005575; P:GO:0009058; P:GO:0034641	F:DNA binding; F:DNA-binding transcription factor activity; C:cellular_component; P:biosynthetic process; P:cellular nitrogen compound metabolic process			IPR030392 (PFAM); IPR026932 (PFAM); IPR024061 (PFAM); mobidb-lite (MOBIDB_LITE); mobidb-lite (MOBIDB_LITE); PTHR13029 (PANTHER); PTHR13029:SF17 (PANTHER); IPR024061 (PROSITE_PROFILES); IPR030392 (PROSITE_PROFILES); IPR008967 (SUPERFAMILY)	F:GO:0003677; F:GO:0003700; P:GO:0006355	F:DNA binding; F:DNA-binding transcription factor activity; P:regulation of transcription, DNA-templated
SPF_FS5_contig_406	[INTERPRO, BLASTED, MAPPED, GO-SLIM]	chymotrypsinogen A-like	1462	15	1.15484e-54	57.4	2	F:GO:0004252; P:GO:0006508	F:serine-type endopeptidase activity; P:proteolysis			IPR001314 (PRINTS); IPR001254 (SMART); G3DSA:2.40.10.10 (GENE3D); IPR001254 (PFAM); PTHR44221 (PANTHER); IPR001254 (PROSITE_PROFILES); IPR001254 (CDD); IPR009003 (SUPERFAMILY)	F:GO:0004252; P:GO:0006508	F:serine-type endopeptidase activity; P:proteolysis
SPF_FS5_contig_407	[INTERPRO, BLASTED, MAPPED, GO-SLIM]	G protein-activated inward rectifier potassium channel 3-like	2406	15	3.13842e-158	79.78	4	F:GO:0005242; C:GO:0016021; P:GO:0034765; P:GO:0071805	F:inward rectifier potassium channel activity; C:integral component of membrane; P:regulation of ion transmembrane transport; P:potassium ion transmembrane transport			IPR016449 (PRINTS); G3DSA:1.10.287.70 (GENE3D); IPR013518 (G3DSA:2.60.40.GENE3D); IPR040445 (PFAM); IPR041647 (PFAM); mobidb-lite (MOBIDB_LITE); mobidb-lite (MOBIDB_LITE); mobidb-lite (MOBIDB_LITE); IPR016449 (PANTHER); PTHR11767:SF93 (PANTHER); SSF81324 (SUPERFAMILY); IPR014756 (SUPERFAMILY)	F:GO:0005242; P:GO:0006813; C:GO:0016021	F:inward rectifier potassium channel activity; P:potassium ion transport; C:integral component of membrane
SPF_FS5_contig_408	[INTERPRO, BLASTED, MAPPED, GO-SLIM]	heat shock 70 kDa protein 4-like	2956	15	0	69.5	2	C:GO:0005622; C:GO:0043226	C:intracellular; C:organelle			IPR013126 (PRINTS); IPR029048 (G3DSA:1.20.1270.GENE3D); G3DSA:3.30.30.30 (GENE3D); G3DSA:3.90.640.10 (GENE3D); IPR013126 (PFAM); G3DSA:3.30.420.40 (GENE3D); IPR029047 (G3DSA:2.60.34.GENE3D); G3DSA:3.30.420.40 (GENE3D); mobidb-lite (MOBIDB_LITE); mobidb-lite (MOBIDB_LITE); mobidb-lite (MOBIDB_LITE); mobidb-lite (MOBIDB_LITE); IPR013126 (PANTHER); PTHR19375:SF18 (PANTHER); cd10228 (CDD); IPR029048 …	no GO terms	no GO terms
SPF_FS5_contig_409	[INTERPRO, BLASTED, MAPPED, GO-SLIM]	ribosomal protein S6 kinase alpha-1 isoform X4	3071	15	0	81.75	5	F:GO:0000287; F:GO:0004674; F:GO:0005524; P:GO:0006468; P:GO:0035556	F:magnesium ion binding; F:protein serine/threonine kinase activity; F:ATP binding; P:protein phosphorylation; P:intracellular signal transduction	EC:2.7.11	Transferring phosphorus-containing groups	IPR000961 (SMART); IPR000719 (SMART); IPR000719 (PFAM); G3DSA:1.10.510.10 (GENE3D); G3DSA:3.30.200.20 (GENE3D); IPR016239 (PIRSF); IPR017892 (PFAM); G3DSA:1.10.510.10 (GENE3D); G3DSA:3.30.200.20 (GENE3D); mobidb-lite (MOBIDB_LITE); mobidb-lite (MOBIDB_LITE); PTHR24351:SF110 (PANTHER); PTHR24351 (PANTHER); IPR000719 (PROSITE_PROFILES); IPR000719 (PROSITE_PROFILES); IPR000961 (PROSITE_PROFILES); cd…	F:GO:0000287; F:GO:0004672; F:GO:0004674; F:GO:0005524; P:GO:0006468; P:GO:0035556	F:magnesium ion binding; F:protein kinase activity; F:protein serine/threonine kinase activity; F:ATP binding; P:protein phosphorylation; P:intracellular signal transduction
SPF_FS5_contig_410	[INTERPRO, BLASTED, MAPPED, GO-SLIM]	Pancreatic triacylglycerol lipase	1431	15	5.20741e-113	57.49	2	F:GO:0004806; P:GO:0006629	F:triglyceride lipase activity; P:lipid metabolic process	EC:3.1.1.1	Carboxylesterase	IPR002331 (PRINTS); IPR000734 (PRINTS); IPR013818 (PFAM); IPR016272 (PIRSF); IPR029058 (G3DSA:3.40.50.GENE3D); PTHR11610:SF102 (PANTHER); IPR000734 (PANTHER); IPR033906 (CDD); IPR029058 (SUPERFAMILY)	F:GO:0004806; P:GO:0006629; F:GO:0052689	F:triglyceride lipase activity; P:lipid metabolic process; F:carboxylic ester hydrolase activity
SPF_FS5_contig_411	[INTERPRO, BLASTED, MAPPED, GO-SLIM]	ribosomal protein S12	581	15	3.41094e-76	96.85	3	F:GO:0003735; P:GO:0006412; C:GO:0022627	F:structural constituent of ribosome; P:translation; C:cytosolic small ribosomal subunit			IPR000530 (PRINTS); IPR029064 (G3DSA:3.30.1330.GENE3D); IPR004038 (PFAM); PTHR11843:SF8 (PANTHER); IPR000530 (PANTHER); IPR029064 (SUPERFAMILY)	F:GO:0003735; C:GO:0005622; C:GO:0005840; P:GO:0006412	F:structural constituent of ribosome; C:intracellular; C:ribosome; P:translation
SPF_FS5_contig_412	[BLASTED, MAPPED, ANNOTATED]	spermatogenesis-associated protein 20	2848	15	0	61.79	1	F:GO:0003824	F:catalytic activity
SPF_FS5_contig_413	[INTERPRO, BLASTED, MAPPED, GO-SLIM]	cysteine dioxygenase type 1-like	939	15	9.11821e-92	77.68	4	F:GO:0005506; F:GO:0017172; P:GO:0042412; P:GO:0055114	F:iron ion binding; F:cysteine dioxygenase activity; P:taurine biosynthetic process; P:oxidation-reduction process	EC:1.13.11; EC:1.13.11.20	Acting on single donors with incorporation of molecular oxygen (oxygenases). The oxygen incorporated need not be derived from O(2); Cysteine dioxygenase	IPR014710 (G3DSA:2.60.120.GENE3D); IPR010300 (PFAM); IPR010300 (PANTHER); PS51257 (PROSITE_PROFILES); IPR011051 (SUPERFAMILY)	F:GO:0005506; F:GO:0016702; P:GO:0055114	F:iron ion binding; F:oxidoreductase activity, acting on single donors with incorporation of molecular oxygen, incorporation of two atoms of oxygen; P:oxidation-reduction process
SPF_FS5_contig_415	[INTERPRO, BLASTED, MAPPED, GO-SLIM]	putative pre-mRNA-splicing factor ATP-dependent RNA helicase PRP1	2427	15	0	92.38	3	F:GO:0003723; F:GO:0005524; F:GO:0034458	F:RNA binding; F:ATP binding; F:3'-5' RNA helicase activity	EC:3.6.1.3; EC:3.6.1.15	Adenosinetriphosphatase; Nucleoside-triphosphate phosphatase	IPR007502 (SMART); IPR001650 (SMART); IPR014001 (SMART); IPR007502 (PFAM); IPR011709 (PFAM); G3DSA:3.40.50.300 (GENE3D); IPR011545 (PFAM); IPR001650 (PFAM); G3DSA:3.40.50.300 (GENE3D); G3DSA:1.20.120.1080 (GENE3D); mobidb-lite (MOBIDB_LITE); mobidb-lite (MOBIDB_LITE); PTHR18934 (PANTHER); PTHR18934:SF95 (PANTHER); IPR014001 (PROSITE_PROFILES); IPR001650 (PROSITE_PROFILES); IPR001650 (CDD); cd0004…	F:GO:0003676; F:GO:0004386; F:GO:0005524	F:nucleic acid binding; F:helicase activity; F:ATP binding
SPF_FS5_contig_417	[INTERPRO, BLASTED, MAPPED, GO-SLIM]	LETM1 and EF-hand domain-containing protein 1, mitochondrial-like isoform X2	2997	15	1.18662e-136	70.47	6	F:GO:0005509; C:GO:0005739; P:GO:0006816; P:GO:0009987; C:GO:0016020; F:GO:0043022	F:calcium ion binding; C:mitochondrion; P:calcium ion transport; P:cellular process; C:membrane; F:ribosome binding			IPR011685 (PFAM); G3DSA:1.10.238.10 (GENE3D); mobidb-lite (MOBIDB_LITE); PTHR14009 (PANTHER); PTHR14009:SF26 (PANTHER); IPR033122 (PROSITE_PROFILES); IPR002048 (PROSITE_PROFILES); IPR002048 (PROSITE_PROFILES); IPR011992 (SUPERFAMILY)	F:GO:0005509; F:GO:0043022	F:calcium ion binding; F:ribosome binding
SPF_FS5_contig_420	[INTERPRO, BLASTED, MAPPED, GO-SLIM]	dihydrolipoyl dehydrogenase, mitochondrial	1652	15	0	84.58	6	F:GO:0004148; C:GO:0005623; F:GO:0009055; P:GO:0022900; P:GO:0045454; F:GO:0050660	F:dihydrolipoyl dehydrogenase activity; C:cell; F:electron transfer activity; P:electron transport chain; P:cell redox homeostasis; F:flavin adenine dinucleotide binding	EC:1.8.1.4	Dihydrolipoyl dehydrogenase	PR00368 (PRINTS); PR00411 (PRINTS); IPR004099 (PFAM); IPR016156 (G3DSA:3.30.390.GENE3D); IPR006258 (TIGRFAM); IPR023753 (PFAM); IPR001100 (PIRSF); IPR036188 (G3DSA:3.50.50.GENE3D); IPR036188 (G3DSA:3.50.50.GENE3D); PTHR22912:SF151 (PANTHER); PTHR22912 (PANTHER); IPR036188 (SUPERFAMILY); IPR016156 (SUPERFAMILY)	F:GO:0004148; F:GO:0009055; F:GO:0016491; P:GO:0045454; F:GO:0050660; P:GO:0055114	F:dihydrolipoyl dehydrogenase activity; F:electron transfer activity; F:oxidoreductase activity; P:cell redox homeostasis; F:flavin adenine dinucleotide binding; P:oxidation-reduction process
SPF_FS5_contig_422	[INTERPRO, BLASTED, MAPPED, GO-SLIM]	40S ribosomal protein S25-like	574	15	3.33987e-39	89.64	1	C:GO:0005840	C:ribosome			IPR004977 (PFAM); G3DSA:1.10.10.2780 (GENE3D); mobidb-lite (MOBIDB_LITE); mobidb-lite (MOBIDB_LITE); PTHR12850:SF5 (PANTHER); IPR004977 (PANTHER); IPR004977 (PRODOM)	no GO terms	no GO terms
SPF_FS5_contig_424	[INTERPRO, BLASTED, MAPPED, GO-SLIM]	cysteine--tRNA ligase, cytoplasmic-like	2483	15	0	73.31	4	F:GO:0004817; F:GO:0005524; C:GO:0005737; P:GO:0006423	F:cysteine-tRNA ligase activity; F:ATP binding; C:cytoplasm; P:cysteinyl-tRNA aminoacylation	EC:6.1.1.16	Cysteine--tRNA ligase	IPR024909 (PRINTS); IPR015803 (TIGRFAM); IPR014729 (G3DSA:3.40.50.GENE3D); IPR032678 (PFAM); PTHR10890:SF3 (PANTHER); IPR024909 (PANTHER); IPR015803 (HAMAP); IPR032678 (CDD); IPR009080 (SUPERFAMILY); SSF52374 (SUPERFAMILY)	F:GO:0000166; F:GO:0004812; F:GO:0004817; F:GO:0005524; P:GO:0006418; P:GO:0006423	F:nucleotide binding; F:aminoacyl-tRNA ligase activity; F:cysteine-tRNA ligase activity; F:ATP binding; P:tRNA aminoacylation for protein translation; P:cysteinyl-tRNA aminoacylation
SPF_FS5_contig_425	[INTERPRO, BLASTED, MAPPED, GO-SLIM]	putative ammonium transporter 1	1201	15	1.42227e-95	67.94	3	F:GO:0008519; P:GO:0015696; C:GO:0016021	F:ammonium transmembrane transporter activity; P:ammonium transport; C:integral component of membrane			IPR029020 (G3DSA:1.10.3430.GENE3D); IPR024041 (PFAM); PTHR11730 (PANTHER); PTHR11730:SF6 (PANTHER); SSF111352 (SUPERFAMILY)	F:GO:0008519; P:GO:0015696; C:GO:0016020	F:ammonium transmembrane transporter activity; P:ammonium transport; C:membrane
SPF_FS5_contig_426	[INTERPRO, BLASTED, MAPPED, GO-SLIM]	putative ammonium transporter 1	964	15	8.97078e-35	65.63	5	F:GO:0008519; C:GO:0016021; P:GO:0072488; F:GO:0097159; F:GO:1901363	F:ammonium transmembrane transporter activity; C:integral component of membrane; P:ammonium transmembrane transport; F:organic cyclic compound binding; F:heterocyclic compound binding			IPR029020 (G3DSA:1.10.3430.GENE3D); IPR024041 (PFAM); mobidb-lite (MOBIDB_LITE); PTHR11730 (PANTHER); PTHR11730:SF6 (PANTHER); SSF111352 (SUPERFAMILY)	F:GO:0008519; P:GO:0015696; C:GO:0016020	F:ammonium transmembrane transporter activity; P:ammonium transport; C:membrane
SPF_FS5_contig_428	[INTERPRO, BLASTED, MAPPED, GO-SLIM]	tyrosine-protein phosphatase 99A-like isoform X1	4896	15	0	64.16	3	F:GO:0004725; F:GO:0005515; P:GO:0006470	F:protein tyrosine phosphatase activity; F:protein binding; P:protein dephosphorylation			IPR000242 (PRINTS); IPR000242 (SMART); IPR003961 (SMART); IPR003595 (SMART); IPR003599 (SMART); PF13927 (PFAM); IPR013783 (G3DSA:2.60.40.GENE3D); IPR029021 (G3DSA:3.90.190.GENE3D); IPR029021 (G3DSA:3.90.190.GENE3D); IPR013783 (G3DSA:2.60.40.GENE3D); IPR000242 (PFAM); IPR013783 (G3DSA:2.60.40.GENE3D); IPR003961 (PFAM); mobidb-lite (MOBIDB_LITE); mobidb-lite (MOBIDB_LITE); PTHR19134 (PANTHER); IPR0…	F:GO:0004725; F:GO:0005515; P:GO:0006470; P:GO:0016311; F:GO:0016791	F:protein tyrosine phosphatase activity; F:protein binding; P:protein dephosphorylation; P:dephosphorylation; F:phosphatase activity
SPF_FS5_contig_429	[INTERPRO, BLASTED, MAPPED, GO-SLIM]	pre-mRNA-splicing factor CWC22 homolog	1247	15	5.08108e-89	86.27	5	F:GO:0003723; C:GO:0005654; C:GO:0005829; P:GO:0006397; C:GO:0032991	F:RNA binding; C:nucleoplasm; C:cytosol; P:mRNA processing; C:protein-containing complex			IPR003890 (SMART); IPR003890 (PFAM); IPR016021 (G3DSA:1.25.40.GENE3D); mobidb-lite (MOBIDB_LITE); mobidb-lite (MOBIDB_LITE); mobidb-lite (MOBIDB_LITE); mobidb-lite (MOBIDB_LITE); mobidb-lite (MOBIDB_LITE); mobidb-lite (MOBIDB_LITE); PTHR18034:SF3 (PANTHER); PTHR18034 (PANTHER); IPR016024 (SUPERFAMILY)	F:GO:0003723; F:GO:0005515	F:RNA binding; F:protein binding
SPF_FS5_contig_430	[INTERPRO, BLASTED, MAPPED, GO-SLIM]	cathepsin L1-like	421	15	1.23361e-45	88.16	1	F:GO:0008233	F:peptidase activity			G3DSA:2.40.50.170 (GENE3D); IPR000668 (PFAM); G3DSA:3.90.70.10 (GENE3D); IPR013128 (PANTHER); PTHR12411:SF57 (PANTHER); IPR038765 (SUPERFAMILY)	P:GO:0006508; F:GO:0008234	P:proteolysis; F:cysteine-type peptidase activity
SPF_FS5_contig_432	[INTERPRO, BLASTED, MAPPED, GO-SLIM]	bone morphogenetic protein 1	679	15	5.67455e-37	61.6	1	F:GO:0008233	F:peptidase activity			IPR000859 (SMART); IPR000859 (PFAM); IPR035914 (G3DSA:2.60.120.GENE3D); IPR035914 (G3DSA:2.60.120.GENE3D); PTHR44131 (PANTHER); IPR000859 (PROSITE_PROFILES); IPR000859 (PROSITE_PROFILES); IPR000859 (CDD); IPR000859 (CDD); IPR035914 (SUPERFAMILY); IPR035914 (SUPERFAMILY)	no GO terms	no GO terms
SPF_FS5_contig_433	[INTERPRO, BLASTED, MAPPED, GO-SLIM]	protein transport protein Sec24C-like isoform X1	4521	15	0	80.64	4	P:GO:0016192; C:GO:0031410; C:GO:0032991; F:GO:0043167	P:vesicle-mediated transport; C:cytoplasmic vesicle; C:protein-containing complex; F:ion binding			G3DSA:2.60.40.1670 (GENE3D); IPR012990 (PFAM); G3DSA:1.20.120.730 (GENE3D); IPR036465 (G3DSA:3.40.50.GENE3D); IPR006896 (PFAM); IPR006895 (PFAM); IPR006900 (PFAM); IPR007123 (PFAM); IPR029006 (G3DSA:3.40.20.GENE3D); G3DSA:2.30.30.380 (GENE3D); mobidb-lite (MOBIDB_LITE); mobidb-lite (MOBIDB_LITE); mobidb-lite (MOBIDB_LITE); mobidb-lite (MOBIDB_LITE); mobidb-lite (MOBIDB_LITE); PTHR13803 (PANTHER);…	P:GO:0006886; P:GO:0006888; F:GO:0008270; C:GO:0030127	P:intracellular protein transport; P:endoplasmic reticulum to Golgi vesicle-mediated transport; F:zinc ion binding; C:COPII vesicle coat
SPF_FS5_contig_434	[INTERPRO, BLASTED, MAPPED, GO-SLIM]	SNF-related serine/threonine-protein kinase	4761	15	7.98707e-176	83.93	7	P:GO:0000226; F:GO:0004674; F:GO:0005524; C:GO:0005737; P:GO:0006468; P:GO:0035556; F:GO:0050321	P:microtubule cytoskeleton organization; F:protein serine/threonine kinase activity; F:ATP binding; C:cytoplasm; P:protein phosphorylation; P:intracellular signal transduction; F:tau-protein kinase activity	EC:2.7.11; EC:2.7.11.26	Transferring phosphorus-containing groups; [Tau protein] kinase	IPR000719 (SMART); G3DSA:1.10.510.10 (GENE3D); IPR000719 (PFAM); mobidb-lite (MOBIDB_LITE); mobidb-lite (MOBIDB_LITE); mobidb-lite (MOBIDB_LITE); mobidb-lite (MOBIDB_LITE); mobidb-lite (MOBIDB_LITE); mobidb-lite (MOBIDB_LITE); mobidb-lite (MOBIDB_LITE); mobidb-lite (MOBIDB_LITE); mobidb-lite (MOBIDB_LITE); mobidb-lite (MOBIDB_LITE); mobidb-lite (MOBIDB_LITE); PTHR24343 (PANTHER); PTHR24343:SF321 …	F:GO:0004672; F:GO:0005524; P:GO:0006468	F:protein kinase activity; F:ATP binding; P:protein phosphorylation
SPF_FS5_contig_436	[INTERPRO, BLASTED, MAPPED, GO-SLIM]	40S ribosomal protein S24-like isoform X2	497	15	7.52676e-55	89.06	3	F:GO:0003735; C:GO:0005840; P:GO:0006412	F:structural constituent of ribosome; C:ribosome; P:translation			G3DSA:3.30.70.3370 (GENE3D); IPR001976 (PFAM); mobidb-lite (MOBIDB_LITE); mobidb-lite (MOBIDB_LITE); IPR001976 (PANTHER); PTHR10496:SF8 (PANTHER); IPR001976 (PRODOM); IPR001976 (HAMAP); IPR012678 (SUPERFAMILY)	F:GO:0003735; C:GO:0005622; C:GO:0005840; P:GO:0006412	F:structural constituent of ribosome; C:intracellular; C:ribosome; P:translation
SPF_FS5_contig_437	[INTERPRO, BLASTED, MAPPED, GO-SLIM]	DNA/RNA-binding protein KIN17	2383	15	8.62105e-169	74.47	3	F:GO:0003674; C:GO:0005634; P:GO:0008150	F:molecular_function; C:nucleus; P:biological_process			IPR019447 (SMART); IPR019447 (PFAM); G3DSA:2.30.30.140 (GENE3D); IPR041330 (PFAM); IPR038254 (G3DSA:1.10.10.GENE3D); IPR014722 (G3DSA:2.30.30.GENE3D); mobidb-lite (MOBIDB_LITE); mobidb-lite (MOBIDB_LITE); IPR037321 (PANTHER); cd13155 (CDD); IPR036236 (SUPERFAMILY)	no GO terms	no GO terms
SPF_FS5_contig_438	[INTERPRO, BLASTED, MAPPED, GO-SLIM]	dihydrolipoyllysine-residue acetyltransferase component of pyruvate dehydrogenase complex, mitochondrial isoform X1	930	15	6.93281e-46	66.33	1	F:GO:0016746	F:transferase activity, transferring acyl groups			IPR004167 (PFAM); IPR000089 (PFAM); G3DSA:2.40.50.100 (GENE3D); IPR036625 (G3DSA:4.10.320.GENE3D); mobidb-lite (MOBIDB_LITE); PTHR23151:SF9 (PANTHER); PTHR23151 (PANTHER); IPR004167 (PROSITE_PROFILES); IPR000089 (PROSITE_PROFILES); cd06849 (CDD); IPR011053 (SUPERFAMILY); IPR036625 (SUPERFAMILY)	F:GO:0016746	F:transferase activity, transferring acyl groups
SPF_FS5_contig_439	[INTERPRO, BLASTED, MAPPED, GO-SLIM]	cytochrome b (mitochondrion)	737	15	2.14379e-133	86.73	6	C:GO:0005743; P:GO:0006122; F:GO:0008121; C:GO:0016021; C:GO:0045275; F:GO:0046872	C:mitochondrial inner membrane; P:mitochondrial electron transport, ubiquinol to cytochrome c; F:ubiquinol-cytochrome-c reductase activity; C:integral component of membrane; C:respiratory chain complex III; F:metal ion binding	EC:1.10.2; EC:1.10.2.2	Acting on diphenols and related substances as donors; Acting on diphenols and related substances as donors	IPR027387 (G3DSA:1.20.810.GENE3D); IPR005797 (PFAM); PTHR19271 (PANTHER); PTHR19271:SF5 (PANTHER); IPR005797 (PROSITE_PROFILES); IPR016174 (SUPERFAMILY)	F:GO:0009055; C:GO:0016020; F:GO:0016491; P:GO:0022904	F:electron transfer activity; C:membrane; F:oxidoreductase activity; P:respiratory electron transport chain
SPF_FS5_contig_441	[INTERPRO, BLASTED, MAPPED, GO-SLIM]	centrosomal protein of 290 kDa-like	4913	15	0	68.52	3	C:GO:0005634; C:GO:0005813; P:GO:0060271	C:nucleus; C:centrosome; P:cilium assembly			IPR032321 (PFAM); mobidb-lite (MOBIDB_LITE); PTHR18879:SF20 (PANTHER); IPR026201 (PANTHER)	C:GO:0005634; C:GO:0005813; P:GO:0060271	C:nucleus; C:centrosome; P:cilium assembly
SPF_FS5_contig_442	[BLASTED, MAPPED, ANNOTATED]	NF-kappa-B essential modulator isoform X1	2893	15	5.2248e-10	53.02	1	C:GO:0044424	C:obsolete intracellular part
SPF_FS5_contig_443	[INTERPRO, BLASTED, MAPPED, GO-SLIM]	chromobox protein homolog 1-like	1020	15	1.0987e-62	80.18	2	C:GO:0005719; P:GO:0045892	C:nuclear euchromatin; P:negative regulation of transcription, DNA-templated			IPR017984 (PRINTS); IPR008251 (SMART); IPR000953 (SMART); IPR023780 (PFAM); G3DSA:2.40.50.40 (GENE3D); G3DSA:2.40.50.40 (GENE3D); IPR008251 (PFAM); mobidb-lite (MOBIDB_LITE); mobidb-lite (MOBIDB_LITE); mobidb-lite (MOBIDB_LITE); PTHR22812 (PANTHER); IPR038033 (PTHR22812:PANTHER); IPR000953 (PROSITE_PROFILES); IPR000953 (PROSITE_PROFILES); cd00034 (CDD); IPR000953 (CDD); IPR016197 (SUPERFAMILY); I…	C:GO:0005634; C:GO:0005719; P:GO:0045892	C:nucleus; C:nuclear euchromatin; P:negative regulation of transcription, DNA-templated
SPF_FS5_contig_447	[INTERPRO, BLASTED, MAPPED, GO-SLIM]	muscle-specific protein 20	778	15	4.10851e-40	68.91	2	F:GO:0003779; P:GO:0031032	F:actin binding; P:actomyosin structure organization			IPR003096 (PRINTS); IPR001997 (PRINTS); IPR001715 (SMART); IPR036872 (G3DSA:1.10.418.GENE3D); IPR001715 (PFAM); PTHR18959:SF84 (PANTHER); PTHR18959 (PANTHER); IPR001715 (PROSITE_PROFILES); IPR001715 (CDD); IPR036872 (SUPERFAMILY)	F:GO:0003779; F:GO:0005515; P:GO:0031032	F:actin binding; F:protein binding; P:actomyosin structure organization
SPF_FS5_contig_448	[BLASTED, MAPPED, ANNOTATED]	macrophage mannose receptor 1-like	9820	15	0	46.18	2	F:GO:0005488; C:GO:0016020	F:binding; C:membrane
SPF_FS5_contig_450	[INTERPRO, BLASTED, MAPPED, GO-SLIM]	C-terminal-binding protein-like isoform X1	1331	15	0	92.78	1	F:GO:0016491	F:oxidoreductase activity			G3DSA:3.40.50.720 (GENE3D); G3DSA:3.40.50.720 (GENE3D); IPR006140 (PFAM); IPR006139 (PFAM); PTHR10996 (PANTHER); PTHR10996:SF173 (PANTHER); cd05299 (CDD); IPR036291 (SUPERFAMILY); SSF52283 (SUPERFAMILY); SSF52283 (SUPERFAMILY)	F:GO:0016616; F:GO:0051287; P:GO:0055114	F:oxidoreductase activity, acting on the CH-OH group of donors, NAD or NADP as acceptor; F:NAD binding; P:oxidation-reduction process
SPF_FS5_contig_451	[INTERPRO, BLASTED, MAPPED, GO-SLIM]	son of sevenless homolog 2-like	6233	15	0	71.69	5	C:GO:0000786; F:GO:0003677; F:GO:0005089; P:GO:0035023; F:GO:0046982	C:nucleosome; F:DNA binding; F:Rho guanyl-nucleotide exchange factor activity; P:regulation of Rho protein signal transduction; F:protein heterodimerization activity			IPR001895 (SMART); IPR001849 (SMART); IPR000219 (SMART); IPR000651 (SMART); IPR001895 (PFAM); IPR036964 (G3DSA:1.10.840.GENE3D); IPR035899 (G3DSA:1.20.900.GENE3D); G3DSA:1.20.870.10 (GENE3D); IPR001849 (PFAM); IPR009072 (G3DSA:1.10.20.GENE3D); IPR011993 (G3DSA:2.30.29.GENE3D); IPR000651 (PFAM); IPR007125 (PFAM); IPR000219 (PFAM); mobidb-lite (MOBIDB_LITE); mobidb-lite (MOBIDB_LITE); mobidb-lite (…	C:GO:0000786; F:GO:0003677; F:GO:0005085; F:GO:0005089; C:GO:0005622; P:GO:0007264; P:GO:0035023; F:GO:0046982	C:nucleosome; F:DNA binding; F:guanyl-nucleotide exchange factor activity; F:Rho guanyl-nucleotide exchange factor activity; C:intracellular; P:small GTPase mediated signal transduction; P:regulation of Rho protein signal transduction; F:protein heterodimerization activity
SPF_FS5_contig_452	[INTERPRO, BLASTED, MAPPED, GO-SLIM]	BPTI/Kunitz domain-containing protein 4-like	2279	15	2.70266e-19	57.42	2	F:GO:0004867; P:GO:0043086	F:serine-type endopeptidase inhibitor activity; P:negative regulation of catalytic activity			G3DSA:2.10.22.10 (GENE3D); IPR004094 (PFAM); IPR004094 (PROSITE_PROFILES); IPR004094 (PROSITE_PROFILES); IPR004094 (PROSITE_PROFILES); IPR011061 (SUPERFAMILY); IPR011061 (SUPERFAMILY); IPR011061 (SUPERFAMILY)	F:GO:0004857; F:GO:0004867	F:enzyme inhibitor activity; F:serine-type endopeptidase inhibitor activity
SPF_FS5_contig_453	[INTERPRO, BLASTED, MAPPED, GO-SLIM]	glucosamine-6-phosphate isomerase 1	1134	15	8.26642e-151	89.2	9	F:GO:0004342; C:GO:0005737; P:GO:0005975; P:GO:0006043; P:GO:0006046; P:GO:0006048; P:GO:0006091; P:GO:0019262; F:GO:0042802	F:glucosamine-6-phosphate deaminase activity; C:cytoplasm; P:carbohydrate metabolic process; P:glucosamine catabolic process; P:N-acetylglucosamine catabolic process; P:UDP-N-acetylglucosamine biosynthetic process; P:generation of precursor metabolites and energy; P:N-acetylneuraminate catabolic process; F:identical protein binding	EC:3.5.99.6	Glucosamine-6-phosphate deaminase	IPR006148 (PFAM); G3DSA:3.40.50.1360 (GENE3D); IPR004547 (TIGRFAM); PTHR11280:SF8 (PANTHER); IPR004547 (PANTHER); IPR004547 (HAMAP); IPR004547 (CDD); IPR037171 (SUPERFAMILY)	F:GO:0004342; P:GO:0005975; P:GO:0006044	F:glucosamine-6-phosphate deaminase activity; P:carbohydrate metabolic process; P:N-acetylglucosamine metabolic process
SPF_FS5_contig_454	[INTERPRO, BLASTED, MAPPED, GO-SLIM]	sodium/hydrogen exchanger 7 isoform X5	1365	15	4.07739e-145	70.26	5	P:GO:0006814; P:GO:0006885; F:GO:0015385; C:GO:0016021; P:GO:0055085	P:sodium ion transport; P:regulation of pH; F:sodium:proton antiporter activity; C:integral component of membrane; P:transmembrane transport			IPR004709 (PRINTS); IPR004709 (TIGRFAM); IPR006153 (PFAM); IPR018422 (PANTHER); PTHR10110:SF127 (PANTHER)	P:GO:0006812; P:GO:0006814; P:GO:0006885; F:GO:0015299; F:GO:0015385; C:GO:0016021; P:GO:0055085	P:cation transport; P:sodium ion transport; P:regulation of pH; F:solute:proton antiporter activity; F:sodium:proton antiporter activity; C:integral component of membrane; P:transmembrane transport
SPF_FS5_contig_456	[INTERPRO, BLASTED, MAPPED, GO-SLIM]	cyclin-dependent kinase 8 isoform X2	1919	15	0	90.23	5	F:GO:0005524; C:GO:0005739; P:GO:0006468; F:GO:0008353; P:GO:0065003	F:ATP binding; C:mitochondrion; P:protein phosphorylation; F:RNA polymerase II CTD heptapeptide repeat kinase activity; P:protein-containing complex assembly	EC:2.7.11; EC:2.7.11.23	Transferring phosphorus-containing groups; [RNA-polymerase]-subunit kinase	IPR000719 (SMART); G3DSA:3.30.200.20 (GENE3D); IPR000719 (PFAM); G3DSA:1.10.510.10 (GENE3D); mobidb-lite (MOBIDB_LITE); mobidb-lite (MOBIDB_LITE); mobidb-lite (MOBIDB_LITE); PTHR24056 (PANTHER); PTHR24056:SF243 (PANTHER); IPR000719 (PROSITE_PROFILES); cd07842 (CDD); IPR011009 (SUPERFAMILY)	F:GO:0004672; F:GO:0005524; P:GO:0006468	F:protein kinase activity; F:ATP binding; P:protein phosphorylation
SPF_FS5_contig_457	[INTERPRO, BLASTED, MAPPED, GO-SLIM]	radial spoke head protein 4 homolog A isoform X1	2430	15	0	79.57	2	C:GO:0005634; P:GO:0008150	C:nucleus; P:biological_process			IPR006802 (PFAM); mobidb-lite (MOBIDB_LITE); mobidb-lite (MOBIDB_LITE); mobidb-lite (MOBIDB_LITE); mobidb-lite (MOBIDB_LITE); mobidb-lite (MOBIDB_LITE); mobidb-lite (MOBIDB_LITE); PTHR13159:SF9 (PANTHER); IPR006802 (PANTHER)	no GO terms	no GO terms
SPF_FS5_contig_459	[INTERPRO, BLASTED, MAPPED, GO-SLIM]	glycogen synthase kinase-3 beta	2389	15	0	92.71	3	F:GO:0004674; F:GO:0005524; P:GO:0006468	F:protein serine/threonine kinase activity; F:ATP binding; P:protein phosphorylation	EC:2.7.11	Transferring phosphorus-containing groups	IPR000719 (SMART); IPR000719 (PFAM); G3DSA:3.30.200.20 (GENE3D); G3DSA:1.10.510.10 (GENE3D); mobidb-lite (MOBIDB_LITE); mobidb-lite (MOBIDB_LITE); PTHR24057 (PANTHER); PTHR24057:SF14 (PANTHER); IPR000719 (PROSITE_PROFILES); IPR039192 (CDD); IPR011009 (SUPERFAMILY)	F:GO:0004672; F:GO:0005524; P:GO:0006468	F:protein kinase activity; F:ATP binding; P:protein phosphorylation
SPF_FS5_contig_460	[INTERPRO, BLASTED, MAPPED, GO-SLIM]	cathepsin L	492	15	2.59642e-46	69.94	2	P:GO:0006508; F:GO:0008234	P:proteolysis; F:cysteine-type peptidase activity			IPR013201 (SMART); IPR000668 (PFAM); G3DSA:3.90.70.10 (GENE3D); IPR013201 (PFAM); IPR013128 (PANTHER); PTHR12411:SF57 (PANTHER); IPR038765 (SUPERFAMILY)	P:GO:0006508; F:GO:0008234	P:proteolysis; F:cysteine-type peptidase activity
SPF_FS5_contig_461	[INTERPRO, BLASTED, MAPPED, GO-SLIM]	junctophilin-1-like isoform X1	871	15	1.39699e-111	84.14	2	C:GO:0005737; C:GO:0032991	C:cytoplasm; C:protein-containing complex			IPR003409 (SMART); G3DSA:2.20.110.10 (GENE3D); IPR003409 (PFAM); mobidb-lite (MOBIDB_LITE); mobidb-lite (MOBIDB_LITE); PTHR23085:SF16 (PANTHER); IPR017191 (PANTHER); SSF82185 (SUPERFAMILY)	C:GO:0030314	C:junctional membrane complex
SPF_FS5_contig_462	[INTERPRO, BLASTED, MAPPED, GO-SLIM]	serine protease hepsin	2350	15	9.95954e-131	51.11	2	F:GO:0004252; P:GO:0006508	F:serine-type endopeptidase activity; P:proteolysis			IPR001314 (PRINTS); IPR001254 (SMART); IPR000859 (SMART); IPR035914 (G3DSA:2.60.120.GENE3D); IPR000859 (PFAM); PIRSF001155 (PIRSF); IPR001254 (PFAM); G3DSA:2.40.10.10 (GENE3D); mobidb-lite (MOBIDB_LITE); mobidb-lite (MOBIDB_LITE); PTHR24251 (PANTHER); PTHR24251:SF21 (PANTHER); PTHR24251 (PANTHER); IPR000859 (PROSITE_PROFILES); PS51257 (PROSITE_PROFILES); IPR001254 (PROSITE_PROFILES); IPR000859 (P…	F:GO:0004252; P:GO:0006508	F:serine-type endopeptidase activity; P:proteolysis
SPF_FS5_contig_463	[INTERPRO, BLASTED, MAPPED, GO-SLIM]	ras-related protein Rab-2	1390	15	3.9756e-133	95.48	6	F:GO:0003924; C:GO:0005783; C:GO:0005794; P:GO:0007165; P:GO:0016192; F:GO:0043167	F:GTPase activity; C:endoplasmic reticulum; C:Golgi apparatus; P:signal transduction; P:vesicle-mediated transport; F:ion binding	EC:3.6.1.15	Nucleoside-triphosphate phosphatase	PR00449 (PRINTS); SM00176 (SMART); SM00175 (SMART); SM00173 (SMART); SM00174 (SMART); G3DSA:3.40.50.300 (GENE3D); IPR005225 (TIGRFAM); IPR001806 (PFAM); mobidb-lite (MOBIDB_LITE); PTHR24073:SF869 (PANTHER); PTHR24073 (PANTHER); PS51419 (PROSITE_PROFILES); cd01866 (CDD); IPR027417 (SUPERFAMILY)	F:GO:0003924; F:GO:0005525	F:GTPase activity; F:GTP binding
SPF_FS5_contig_464	[INTERPRO, BLASTED, MAPPED, GO-SLIM]	spectrin beta chain isoform X1	6636	15	0	78.78	5	F:GO:0003779; F:GO:0005200; F:GO:0005543; C:GO:0008091; P:GO:0051693	F:actin binding; F:structural constituent of cytoskeleton; F:phospholipid binding; C:spectrin; P:actin filament capping			IPR001715 (SMART); IPR018159 (SMART); G3DSA:1.20.58.60 (GENE3D); G3DSA:1.20.58.60 (GENE3D); G3DSA:1.20.58.60 (GENE3D); IPR036872 (G3DSA:1.10.418.GENE3D); G3DSA:1.20.58.60 (GENE3D); G3DSA:1.20.58.1940 (GENE3D); IPR001715 (PFAM); G3DSA:1.20.58.60 (GENE3D); G3DSA:1.20.58.60 (GENE3D); G3DSA:1.20.58.60 (GENE3D); IPR002017 (PFAM); G3DSA:1.20.58.60 (GENE3D); IPR016343 (PIRSF); IPR036872 (G3DSA:1.10.418.…	F:GO:0003779; F:GO:0005200; F:GO:0005515; C:GO:0008091	F:actin binding; F:structural constituent of cytoskeleton; F:protein binding; C:spectrin
SPF_FS5_contig_467	[INTERPRO, BLASTED, MAPPED, GO-SLIM]	predicted protein	515	15	1.24038e-16	65.7	2	C:GO:0005764; P:GO:0006665	C:lysosome; P:sphingolipid metabolic process			IPR008373 (PRINTS); IPR008139 (SMART); IPR007856 (PFAM); IPR008138 (PFAM); G3DSA:1.10.225.10 (GENE3D); PTHR11480 (PANTHER); IPR008139 (PROSITE_PROFILES); IPR011001 (SUPERFAMILY)	C:GO:0005764; P:GO:0006629; P:GO:0006665	C:lysosome; P:lipid metabolic process; P:sphingolipid metabolic process
SPF_FS5_contig_468	[INTERPRO, BLASTED, MAPPED, GO-SLIM]	Golgi-associated plant pathogenesis-related protein 1	1103	15	5.87262e-34	67.16	1	C:GO:0005576	C:extracellular region			IPR001283 (PRINTS); IPR014044 (SMART); IPR014044 (PFAM); IPR035940 (G3DSA:3.40.33.GENE3D); PTHR10334:SF332 (PANTHER); IPR001283 (PANTHER); IPR035940 (SUPERFAMILY)	no GO terms	no GO terms
SPF_FS5_contig_469	[INTERPRO, BLASTED, MAPPED, GO-SLIM]	ubiquitin carboxyl-terminal hydrolase 7-like	4249	15	0	77.87	4	F:GO:0005515; P:GO:0006511; P:GO:0016579; F:GO:0036459	F:protein binding; P:ubiquitin-dependent protein catabolic process; P:protein deubiquitination; F:thiol-dependent ubiquitinyl hydrolase activity	EC:3.4.19.12	Ubiquitinyl hydrolase 1	IPR002083 (SMART); G3DSA:3.90.70.10 (GENE3D); G3DSA:3.10.20.90 (GENE3D); IPR029346 (PFAM); G3DSA:3.10.20.90 (GENE3D); IPR008974 (G3DSA:2.60.210.GENE3D); G3DSA:3.10.20.90 (GENE3D); IPR024729 (PFAM); IPR001394 (PFAM); IPR002083 (PFAM); mobidb-lite (MOBIDB_LITE); mobidb-lite (MOBIDB_LITE); PTHR24006:SF644 (PANTHER); PTHR24006 (PANTHER); IPR028889 (PROSITE_PROFILES); IPR002083 (PROSITE_PROFILES); cd0…	F:GO:0005515; P:GO:0016579; F:GO:0036459	F:protein binding; P:protein deubiquitination; F:thiol-dependent ubiquitinyl hydrolase activity
SPF_FS5_contig_470	[INTERPRO, BLASTED, MAPPED, GO-SLIM]	MAP kinase-interacting serine/threonine-protein kinase 1-like	2346	15	6.14866e-135	70.99	3	F:GO:0004672; F:GO:0005524; P:GO:0006468	F:protein kinase activity; F:ATP binding; P:protein phosphorylation			IPR000719 (SMART); IPR000719 (PFAM); G3DSA:1.10.510.10 (GENE3D); G3DSA:3.30.200.20 (GENE3D); mobidb-lite (MOBIDB_LITE); mobidb-lite (MOBIDB_LITE); PTHR24349 (PANTHER); PTHR24349:SF114 (PANTHER); IPR000719 (PROSITE_PROFILES); IPR011009 (SUPERFAMILY)	F:GO:0004672; F:GO:0005524; P:GO:0006468	F:protein kinase activity; F:ATP binding; P:protein phosphorylation
SPF_FS5_contig_471	[BLASTED, MAPPED, ANNOTATED]	EF-hand domain-containing protein D1	2632	15	2.16718e-84	46.7	1	C:GO:0016020	C:membrane
SPF_FS5_contig_475	[INTERPRO, BLASTED, MAPPED, GO-SLIM]	serine/threonine-protein kinase PINK1, mitochondrial	2415	15	1.63789e-33	50.28	3	F:GO:0004672; F:GO:0005524; P:GO:0006468	F:protein kinase activity; F:ATP binding; P:protein phosphorylation			IPR000719 (SMART); G3DSA:1.10.510.10 (GENE3D); IPR000719 (PFAM); PTHR22972:SF7 (PANTHER); PTHR22972 (PANTHER); IPR000719 (PROSITE_PROFILES); IPR011009 (SUPERFAMILY)	F:GO:0004672; F:GO:0005524; P:GO:0006468	F:protein kinase activity; F:ATP binding; P:protein phosphorylation
SPF_FS5_contig_476	[INTERPRO, BLASTED, MAPPED, GO-SLIM]	cytochrome P450 3A6-like	1905	15	2.70158e-109	56.82	4	F:GO:0005506; F:GO:0016705; F:GO:0020037; P:GO:0055114	F:iron ion binding; F:oxidoreductase activity, acting on paired donors, with incorporation or reduction of molecular oxygen; F:heme binding; P:oxidation-reduction process			IPR002401 (PRINTS); IPR001128 (PRINTS); IPR036396 (G3DSA:1.10.630.GENE3D); IPR001128 (PFAM); PTHR24292 (PANTHER); IPR036396 (SUPERFAMILY)	F:GO:0005506; F:GO:0016705; F:GO:0020037; P:GO:0055114	F:iron ion binding; F:oxidoreductase activity, acting on paired donors, with incorporation or reduction of molecular oxygen; F:heme binding; P:oxidation-reduction process
SPF_FS5_contig_477	[INTERPRO, BLASTED, MAPPED, GO-SLIM]	phosphorylated adapter RNA export protein	4988	15	3.90796e-18	65.38	5	C:GO:0005634; P:GO:0006408; F:GO:0015643; C:GO:0043025; C:GO:0044446	C:nucleus; P:snRNA export from nucleus; F:toxic substance binding; C:neuronal cell body; C:obsolete intracellular organelle part			IPR038092 (G3DSA:1.10.10.GENE3D); IPR019385 (PFAM); mobidb-lite (MOBIDB_LITE); mobidb-lite (MOBIDB_LITE); mobidb-lite (MOBIDB_LITE); mobidb-lite (MOBIDB_LITE); mobidb-lite (MOBIDB_LITE); mobidb-lite (MOBIDB_LITE); mobidb-lite (MOBIDB_LITE); mobidb-lite (MOBIDB_LITE); mobidb-lite (MOBIDB_LITE); IPR039047 (PANTHER); PTHR13135:SF0 (PANTHER)	P:GO:0006408	P:snRNA export from nucleus
SPF_FS5_contig_479	[INTERPRO, BLASTED, MAPPED, GO-SLIM]	4-aminobutyrate aminotransferase, mitochondrial-like	1084	15	1.59476e-103	69.28	4	F:GO:0003867; C:GO:0005739; P:GO:0009450; F:GO:0030170	F:4-aminobutyrate transaminase activity; C:mitochondrion; P:gamma-aminobutyric acid catabolic process; F:pyridoxal phosphate binding			IPR015422 (G3DSA:3.90.1150.GENE3D); IPR005814 (PFAM); IPR015421 (G3DSA:3.40.640.GENE3D); PTHR43206:SF1 (PANTHER); PTHR43206 (PANTHER); IPR015424 (SUPERFAMILY)	F:GO:0003824; F:GO:0008483; F:GO:0030170	F:catalytic activity; F:transaminase activity; F:pyridoxal phosphate binding
SPF_FS5_contig_484	[INTERPRO, BLASTED, MAPPED, GO-SLIM]	60S acidic ribosomal protein P2-like	464	15	6.00354e-23	84.31	10	F:GO:0003735; F:GO:0005506; P:GO:0006414; C:GO:0022625; P:GO:0043009; F:GO:0043021; C:GO:0045202; P:GO:0045727; P:GO:0071320; P:GO:1904401	F:structural constituent of ribosome; F:iron ion binding; P:translational elongation; C:cytosolic large ribosomal subunit; P:chordate embryonic development; F:ribonucleoprotein complex binding; C:synapse; P:positive regulation of translation; P:cellular response to cAMP; P:cellular response to Thyroid stimulating hormone			PF00428 (PFAM); IPR038716 (G3DSA:1.10.10.GENE3D); mobidb-lite (MOBIDB_LITE); PTHR21141:SF72 (PANTHER); PTHR21141 (PANTHER); IPR027534 (HAMAP); cd05833 (CDD)	F:GO:0003735; C:GO:0005622; C:GO:0005840; P:GO:0006414	F:structural constituent of ribosome; C:intracellular; C:ribosome; P:translational elongation
SPF_FS5_contig_485	[INTERPRO, BLASTED, MAPPED, GO-SLIM]	tryptophan 2,3-dioxygenase-like isoform X1	1776	15	5.18531e-131	77.57	5	P:GO:0006520; P:GO:0009056; F:GO:0016491; P:GO:0034641; F:GO:0043167	P:cellular amino acid metabolic process; P:catabolic process; F:oxidoreductase activity; P:cellular nitrogen compound metabolic process; F:ion binding	EC:1.13.11; EC:1.13.11.11	Acting on single donors with incorporation of molecular oxygen (oxygenases). The oxygen incorporated need not be derived from O(2); Tryptophan 2,3-dioxygenase	IPR004981 (PFAM); IPR004981 (PANTHER); PTHR10138:SF0 (PANTHER); IPR004981 (HAMAP); IPR037217 (SUPERFAMILY)	F:GO:0004833; P:GO:0019441; F:GO:0020037; F:GO:0046872	F:tryptophan 2,3-dioxygenase activity; P:tryptophan catabolic process to kynurenine; F:heme binding; F:metal ion binding
SPF_FS5_contig_486	[INTERPRO, BLASTED, MAPPED, GO-SLIM]	putative phospholipase B-like 2	2328	15	0	70.53	2	P:GO:0006629; F:GO:0016301	P:lipid metabolic process; F:kinase activity			G3DSA:3.60.60.30 (GENE3D); IPR007000 (PFAM); PTHR12370:SF3 (PANTHER); IPR007000 (PANTHER)	no GO terms	no GO terms
SPF_FS5_contig_487	[INTERPRO, BLASTED, MAPPED, GO-SLIM]	cytosolic 5'-nucleotidase 3A isoform X1	619	15	2.30091e-25	60.77	5	C:GO:0005737; F:GO:0016791; P:GO:0034641; F:GO:0043167; P:GO:0044281	C:cytoplasm; F:phosphatase activity; P:cellular nitrogen compound metabolic process; F:ion binding; P:small molecule metabolic process	EC:3.1.3.5; EC:3.1.3.31	5'-nucleotidase; Nucleotidase	IPR006434 (PFAM); IPR023214 (G3DSA:3.40.50.GENE3D); G3DSA:1.10.150.340 (GENE3D); PTHR13045 (PANTHER); IPR036412 (SUPERFAMILY)	F:GO:0000287; C:GO:0005737; F:GO:0008253	F:magnesium ion binding; C:cytoplasm; F:5'-nucleotidase activity
SPF_FS5_contig_488	[INTERPRO, BLASTED, MAPPED, GO-SLIM]	fibrinolytic enzyme, isozyme C-like	1295	15	1.18682e-111	58.45	2	F:GO:0004252; P:GO:0006508	F:serine-type endopeptidase activity; P:proteolysis			IPR001314 (PRINTS); IPR001254 (SMART); IPR001254 (PFAM); IPR000859 (PFAM); IPR035914 (G3DSA:2.60.120.GENE3D); G3DSA:2.40.10.10 (GENE3D); PTHR24250 (PANTHER); IPR001254 (PROSITE_PROFILES); IPR000859 (PROSITE_PROFILES); IPR000859 (CDD); IPR001254 (CDD); IPR009003 (SUPERFAMILY); IPR035914 (SUPERFAMILY)	F:GO:0004252; P:GO:0006508	F:serine-type endopeptidase activity; P:proteolysis
SPF_FS5_contig_489	[BLASTED, MAPPED, ANNOTATED]	E3 ubiquitin-protein ligase LRSAM1 isoform X1	366	15	1.03431e-16	57.97	1	C:GO:0016020	C:membrane
SPF_FS5_contig_491	[INTERPRO, BLASTED, MAPPED, GO-SLIM]	lactose-binding lectin l-2-like	778	15	2.40715e-50	52.17	1	F:GO:0003674	F:molecular_function			IPR001304 (SMART); IPR001304 (PFAM); IPR016186 (G3DSA:3.10.100.GENE3D); PTHR22802:SF323 (PANTHER); PTHR22802 (PANTHER); IPR001304 (PROSITE_PROFILES); cd00037 (CDD); IPR016187 (SUPERFAMILY)	no GO terms	no GO terms
SPF_FS5_contig_492	[INTERPRO, BLASTED, MAPPED, GO-SLIM]	single-stranded DNA-binding protein 3-like isoform X2	3036	15	1.05425e-59	93.33	2	F:GO:0003697; F:GO:0005515	F:single-stranded DNA binding; F:protein binding			IPR008116 (PRINTS); PF04503 (PFAM); mobidb-lite (MOBIDB_LITE); PTHR12610 (PANTHER); PTHR12610:SF23 (PANTHER); IPR006594 (PROSITE_PROFILES)	F:GO:0003697; F:GO:0005515	F:single-stranded DNA binding; F:protein binding
SPF_FS5_contig_493	[INTERPRO, BLASTED, MAPPED, GO-SLIM]	reticulon-4-interacting protein 1, mitochondrial isoform X2	3388	15	3.89122e-45	61.72	2	C:GO:0005739; F:GO:0016491	C:mitochondrion; F:oxidoreductase activity			IPR020843 (SMART); PF13602 (PFAM); G3DSA:3.40.50.720 (GENE3D); PTHR11695 (PANTHER); IPR036291 (SUPERFAMILY)	F:GO:0016491	F:oxidoreductase activity
SPF_FS5_contig_494	[INTERPRO, BLASTED, MAPPED, GO-SLIM]	heterogeneous nuclear ribonucleoprotein K-like isoform X13	1428	15	1.94954e-89	76.98	4	F:GO:0003677; F:GO:0003723; P:GO:0006357; P:GO:0006396	F:DNA binding; F:RNA binding; P:regulation of transcription by RNA polymerase II; P:RNA processing			IPR004087 (SMART); IPR004088 (PFAM); IPR036612 (G3DSA:3.30.1370.GENE3D); IPR036612 (G3DSA:3.30.1370.GENE3D); IPR036612 (G3DSA:3.30.1370.GENE3D); mobidb-lite (MOBIDB_LITE); IPR033090 (PTHR10288:PANTHER); PTHR10288 (PANTHER); PTHR10288 (PANTHER); IPR033090 (PTHR10288:PANTHER); IPR033090 (PTHR10288:PANTHER); PS50084 (PROSITE_PROFILES); PS50084 (PROSITE_PROFILES); PS50084 (PROSITE_PROFILES); cd00105 …	F:GO:0003676; F:GO:0003677; F:GO:0003723; P:GO:0006357; P:GO:0006396	F:nucleic acid binding; F:DNA binding; F:RNA binding; P:regulation of transcription by RNA polymerase II; P:RNA processing
SPF_FS5_contig_495	[INTERPRO, BLASTED, MAPPED, GO-SLIM]	40S ribosomal protein S17-like	669	15	4.18655e-76	89.95	3	F:GO:0003735; C:GO:0005840; P:GO:0006412	F:structural constituent of ribosome; C:ribosome; P:translation			IPR036401 (G3DSA:1.10.60.GENE3D); IPR001210 (PFAM); mobidb-lite (MOBIDB_LITE); IPR001210 (PANTHER)	F:GO:0003735; C:GO:0005622; C:GO:0005840; P:GO:0006412	F:structural constituent of ribosome; C:intracellular; C:ribosome; P:translation
SPF_FS5_contig_496	[INTERPRO, BLASTED, MAPPED, GO-SLIM]	heat shock factor-binding protein 1-like	541	15	5.2255e-32	88.57	3	F:GO:0003674; P:GO:0009058; P:GO:0034641	F:molecular_function; P:biosynthetic process; P:cellular nitrogen compound metabolic process			G3DSA:1.20.5.430 (GENE3D); IPR009643 (PFAM); IPR009643 (PANTHER)	F:GO:0003714	F:transcription corepressor activity
SPF_FS5_contig_497	[BLASTED, MAPPED, ANNOTATED]	polycystic kidney disease protein 1-like 2	6533	15	0	50.07	2	F:GO:0005488; C:GO:0016020	F:binding; C:membrane
SPF_FS5_contig_498	[INTERPRO, BLASTED, MAPPED, GO-SLIM]	cytochrome c oxidase subunit 7C, mitochondrial-like	577	15	3.08869e-19	71.86	2	F:GO:0004129; C:GO:0016020	F:cytochrome-c oxidase activity; C:membrane			IPR036636 (G3DSA:4.10.49.GENE3D); IPR004202 (PFAM); IPR004202 (PANTHER); IPR004202 (CDD); IPR036636 (SUPERFAMILY)	F:GO:0004129	F:cytochrome-c oxidase activity
SPF_FS5_contig_499	[INTERPRO, BLASTED, MAPPED, GO-SLIM]	predicted protein	685	15	2.25375e-17	60.34	2	C:GO:0005764; P:GO:0006665	C:lysosome; P:sphingolipid metabolic process			IPR008373 (PRINTS); IPR008139 (SMART); G3DSA:1.10.225.10 (GENE3D); IPR008138 (PFAM); IPR007856 (PFAM); PTHR11480:SF3 (PANTHER); PTHR11480 (PANTHER); IPR008139 (PROSITE_PROFILES); IPR011001 (SUPERFAMILY)	C:GO:0005764; P:GO:0006629; P:GO:0006665	C:lysosome; P:lipid metabolic process; P:sphingolipid metabolic process
SPF_FS5_contig_500	[INTERPRO, BLASTED, MAPPED, GO-SLIM]	ATP-dependent Clp protease ATP-binding subunit clpX-like, mitochondrial	2281	15	0	76.89	6	F:GO:0004176; F:GO:0005524; C:GO:0005759; P:GO:0006457; P:GO:0030163; F:GO:0051082	F:ATP-dependent peptidase activity; F:ATP binding; C:mitochondrial matrix; P:protein folding; P:protein catabolic process; F:unfolded protein binding	EC:3.6.1.3; EC:3.6.1.15	Adenosinetriphosphatase; Nucleoside-triphosphate phosphatase	IPR019489 (SMART); IPR003593 (SMART); IPR003959 (PFAM); IPR019489 (PFAM); G3DSA:1.10.8.60 (GENE3D); mobidb-lite (MOBIDB_LITE); mobidb-lite (MOBIDB_LITE); mobidb-lite (MOBIDB_LITE); mobidb-lite (MOBIDB_LITE); mobidb-lite (MOBIDB_LITE); mobidb-lite (MOBIDB_LITE); mobidb-lite (MOBIDB_LITE); mobidb-lite (MOBIDB_LITE); mobidb-lite (MOBIDB_LITE); PTHR11262:SF4 (PANTHER); IPR004487 (PANTHER); cd00009 (C…	F:GO:0005524; P:GO:0006457; F:GO:0051082	F:ATP binding; P:protein folding; F:unfolded protein binding
SPF_FS5_contig_501	[INTERPRO, BLASTED, MAPPED, GO-SLIM]	large subunit ribosomal protein 23	528	15	7.61977e-75	95.29	4	F:GO:0003735; P:GO:0006412; C:GO:0022625; F:GO:0070180	F:structural constituent of ribosome; P:translation; C:cytosolic large ribosomal subunit; F:large ribosomal subunit rRNA binding			IPR000218 (SMART); IPR000218 (PFAM); IPR036853 (G3DSA:2.40.150.GENE3D); IPR000218 (PANTHER); PTHR11761:SF8 (PANTHER); IPR000218 (HAMAP); IPR036853 (SUPERFAMILY)	F:GO:0003735; C:GO:0005840; P:GO:0006412	F:structural constituent of ribosome; C:ribosome; P:translation
SPF_FS5_contig_502	[INTERPRO, BLASTED, MAPPED, GO-SLIM]	solute carrier family 12 member 4-like isoform X1	5480	15	0	71	4	C:GO:0005887; F:GO:0015379; P:GO:0071477; P:GO:1902476	C:integral component of plasma membrane; F:potassium:chloride symporter activity; P:cellular hypotonic salinity response; P:chloride transmembrane transport			IPR000076 (PRINTS); IPR004842 (TIGRFAM); IPR004841 (PFAM); IPR018491 (PFAM); G3DSA:1.20.1740.10 (GENE3D); mobidb-lite (MOBIDB_LITE); mobidb-lite (MOBIDB_LITE); mobidb-lite (MOBIDB_LITE); mobidb-lite (MOBIDB_LITE); PTHR11827 (PANTHER); IPR030364 (PTHR11827:PANTHER)	F:GO:0005215; C:GO:0005887; P:GO:0006811; F:GO:0015377; F:GO:0015379; C:GO:0016020; C:GO:0016021; P:GO:0055085; P:GO:0071477; P:GO:1902476	F:transporter activity; C:integral component of plasma membrane; P:ion transport; F:cation:chloride symporter activity; F:potassium:chloride symporter activity; C:membrane; C:integral component of membrane; P:transmembrane transport; P:cellular hypotonic salinity response; P:chloride transmembrane transport
SPF_FS5_contig_503	[INTERPRO, BLASTED, MAPPED, GO-SLIM]	ATP-binding cassette sub-family G member 1-like isoform X1	3162	15	0	69.96	3	F:GO:0005524; C:GO:0016020; F:GO:0016887	F:ATP binding; C:membrane; F:ATPase activity			IPR003593 (SMART); G3DSA:3.40.50.300 (GENE3D); IPR003439 (PFAM); IPR013525 (PFAM); mobidb-lite (MOBIDB_LITE); mobidb-lite (MOBIDB_LITE); PTHR19241 (PANTHER); PTHR19241:SF438 (PANTHER); IPR003439 (PROSITE_PROFILES); cd03213 (CDD); IPR027417 (SUPERFAMILY)	F:GO:0005524; C:GO:0016020; F:GO:0016887	F:ATP binding; C:membrane; F:ATPase activity
SPF_FS5_contig_507	[INTERPRO, BLASTED, MAPPED, GO-SLIM]	DNA damage-regulated autophagy modulator protein 2	1463	15	2.393e-78	63.44	2	C:GO:0005764; P:GO:0006914	C:lysosome; P:autophagy			IPR019402 (PFAM); PTHR21324 (PANTHER); IPR032990 (PTHR21324:PANTHER)	P:GO:0010506	P:regulation of autophagy
SPF_FS5_contig_508	[INTERPRO, BLASTED, MAPPED, GO-SLIM]	casein kinase II subunit alpha isoform X1	1591	15	0	94.7	3	F:GO:0004674; F:GO:0005524; P:GO:0006468	F:protein serine/threonine kinase activity; F:ATP binding; P:protein phosphorylation	EC:2.7.11	Transferring phosphorus-containing groups	IPR000719 (SMART); G3DSA:3.30.200.20 (GENE3D); G3DSA:1.10.510.10 (GENE3D); IPR000719 (PFAM); PTHR24054 (PANTHER); PTHR24054:SF28 (PANTHER); IPR000719 (PROSITE_PROFILES); cd14132 (CDD); IPR011009 (SUPERFAMILY)	F:GO:0004672; F:GO:0005524; P:GO:0006468	F:protein kinase activity; F:ATP binding; P:protein phosphorylation
SPF_FS5_contig_509	[INTERPRO, BLASTED, MAPPED, GO-SLIM]	C-myc promoter-binding protein-like isoform X1	2321	15	0	71.86	2	C:GO:0005768; C:GO:0032991	C:endosome; C:protein-containing complex			IPR005112 (SMART); IPR005113 (SMART); IPR001194 (SMART); IPR018798 (PFAM); IPR005112 (PFAM); G3DSA:3.40.50.11500 (GENE3D); IPR005113 (PFAM); IPR001194 (PFAM); G3DSA:2.100.10.50 (GENE3D); mobidb-lite (MOBIDB_LITE); mobidb-lite (MOBIDB_LITE); PTHR12296:SF16 (PANTHER); PTHR12296 (PANTHER); IPR023341 (PROSITE_PROFILES); IPR037516 (PROSITE_PROFILES)	C:GO:0000813	C:ESCRT I complex
SPF_FS5_contig_510	[INTERPRO, BLASTED, MAPPED, GO-SLIM]	protein SSUH2 homolog	2331	15	1.49567e-96	63.94	1	F:GO:0051082	F:unfolded protein binding			PTHR15852 (PANTHER); PTHR15852:SF29 (PANTHER)	no GO terms	no GO terms
SPF_FS5_contig_512	[INTERPRO, BLASTED, MAPPED, GO-SLIM]	CD63 antigen	1432	15	7.83209e-29	55.48	1	C:GO:0016021	C:integral component of membrane			IPR000301 (PRINTS); IPR018499 (PFAM); IPR000301 (PIRSF); PTHR19282:SF277 (PANTHER); PTHR19282 (PANTHER)	C:GO:0016021	C:integral component of membrane
SPF_FS5_contig_514	[INTERPRO, BLASTED, MAPPED, GO-SLIM]	Serine/threonine-protein kinase PAK mbt	3439	15	8.21864e-113	75.62	3	F:GO:0004672; F:GO:0005524; P:GO:0006468	F:protein kinase activity; F:ATP binding; P:protein phosphorylation			IPR000095 (SMART); G3DSA:3.30.200.20 (GENE3D); IPR036936 (G3DSA:3.90.810.GENE3D); G3DSA:1.10.510.10 (GENE3D); IPR000095 (PFAM); IPR000719 (PFAM); mobidb-lite (MOBIDB_LITE); mobidb-lite (MOBIDB_LITE); mobidb-lite (MOBIDB_LITE); mobidb-lite (MOBIDB_LITE); mobidb-lite (MOBIDB_LITE); mobidb-lite (MOBIDB_LITE); mobidb-lite (MOBIDB_LITE); PTHR24361 (PANTHER); PTHR24361:SF345 (PANTHER); IPR000095 (PROSI…	F:GO:0004672; F:GO:0005524; P:GO:0006468	F:protein kinase activity; F:ATP binding; P:protein phosphorylation
SPF_FS5_contig_517	[INTERPRO, BLASTED, MAPPED, GO-SLIM]	peptidase M4 family protein	1479	15	1.78952e-94	70.48	2	F:GO:0004222; P:GO:0006508	F:metalloendopeptidase activity; P:proteolysis			IPR023612 (PRINTS); IPR001570 (PFAM); IPR013856 (PFAM); G3DSA:3.10.170.10 (GENE3D); IPR027268 (G3DSA:1.10.390.GENE3D); PTHR33794 (PANTHER); PTHR33794:SF1 (PANTHER); IPR023612 (CDD); SSF55486 (SUPERFAMILY)	F:GO:0004222; P:GO:0006508	F:metalloendopeptidase activity; P:proteolysis
SPF_FS5_contig_520	[INTERPRO, BLASTED, MAPPED, GO-SLIM]	enoyl-CoA delta isomerase 2, mitochondrial isoform X1	1705	15	1.57444e-154	73.44	2	F:GO:0000062; F:GO:0003824	F:fatty-acyl-CoA binding; F:catalytic activity			IPR000582 (PRINTS); IPR000582 (PFAM); IPR001753 (PFAM); IPR014748 (G3DSA:1.10.12.GENE3D); G3DSA:3.90.226.10 (GENE3D); IPR014352 (G3DSA:1.20.80.GENE3D); PTHR23310:SF72 (PANTHER); PTHR23310 (PANTHER); IPR000582 (PROSITE_PROFILES); IPR000582 (CDD); cd06558 (CDD); IPR035984 (SUPERFAMILY); IPR029045 (SUPERFAMILY)	F:GO:0000062; F:GO:0003824	F:fatty-acyl-CoA binding; F:catalytic activity
SPF_FS5_contig_523	[INTERPRO, BLASTED, MAPPED, GO-SLIM]	Microsomal glutathione S-transferase 3	922	15	5.28345e-46	71.36	4	C:GO:0005635; C:GO:0005783; F:GO:0016491; F:GO:0016765	C:nuclear envelope; C:endoplasmic reticulum; F:oxidoreductase activity; F:transferase activity, transferring alkyl or aryl (other than methyl) groups	EC:2.5.1.18; EC:1.11.1.9; EC:1.11.1.7	Glutathione transferase; Glutathione peroxidase; Peroxidase	IPR001129 (PFAM); IPR023352 (G3DSA:1.20.120.GENE3D); PTHR10250 (PANTHER); PTHR10250:SF17 (PANTHER); IPR023352 (SUPERFAMILY)	no GO terms	no GO terms
SPF_FS5_contig_525	[INTERPRO, BLASTED, MAPPED, GO-SLIM]	CYP2D50	1586	15	4.6478e-88	54.94	4	F:GO:0005506; F:GO:0016712; F:GO:0020037; P:GO:0055114	F:iron ion binding; F:oxidoreductase activity, acting on paired donors, with incorporation or reduction of molecular oxygen, reduced flavin or flavoprotein as one donor, and incorporation of one atom of oxygen; F:heme binding; P:oxidation-reduction process			IPR008069 (PRINTS); IPR001128 (PRINTS); IPR002401 (PRINTS); IPR001128 (PFAM); IPR036396 (G3DSA:1.10.630.GENE3D); PTHR24300 (PANTHER); IPR036396 (SUPERFAMILY)	F:GO:0005506; F:GO:0016705; F:GO:0016712; F:GO:0020037; P:GO:0055114	F:iron ion binding; F:oxidoreductase activity, acting on paired donors, with incorporation or reduction of molecular oxygen; F:oxidoreductase activity, acting on paired donors, with incorporation or reduction of molecular oxygen, reduced flavin or flavoprotein as one donor, and incorporation of one atom of oxygen; F:heme binding; P:oxidation-reduction process
SPF_FS5_contig_526	[INTERPRO, BLASTED, MAPPED, GO-SLIM]	dihydropteridine reductase	783	15	5.98512e-67	77.77	1	F:GO:0016491	F:oxidoreductase activity			IPR002347 (PFAM); G3DSA:3.40.50.720 (GENE3D); PTHR15104 (PANTHER); cd05334 (CDD); IPR036291 (SUPERFAMILY)	no GO terms	no GO terms
SPF_FS5_contig_527	[INTERPRO, BLASTED, MAPPED, GO-SLIM]	glucose-6-phosphate exchanger SLC37A2-like isoform X3	2284	15	2.12137e-140	68.58	6	C:GO:0005789; P:GO:0006820; F:GO:0015297; C:GO:0016021; P:GO:0055085; P:GO:0071702	C:endoplasmic reticulum membrane; P:anion transport; F:antiporter activity; C:integral component of membrane; P:transmembrane transport; P:organic substance transport			G3DSA:1.20.1250.20 (GENE3D); IPR011701 (PFAM); G3DSA:1.20.1250.20 (GENE3D); IPR000849 (PIRSF); mobidb-lite (MOBIDB_LITE); PTHR43184:SF9 (PANTHER); PTHR43184 (PANTHER); IPR020846 (PROSITE_PROFILES); IPR020846 (CDD); IPR036259 (SUPERFAMILY)	C:GO:0016021; F:GO:0022857; P:GO:0055085	C:integral component of membrane; F:transmembrane transporter activity; P:transmembrane transport
SPF_FS5_contig_528	[INTERPRO, BLASTED, MAPPED, GO-SLIM]	Post-GPI attachment to proteins factor 2	1041	15	9.22608e-44	57.57	1	C:GO:0000139	C:Golgi membrane			IPR019402 (PFAM); PTHR12892:SF11 (PANTHER); IPR039545 (PANTHER)	C:GO:0000139	C:Golgi membrane
SPF_FS5_contig_529	[INTERPRO, BLASTED, MAPPED, GO-SLIM]	protein MON2 homolog isoform X1	5907	15	0	66.75	1	P:GO:0006810	P:transport			IPR032691 (PFAM); IPR015403 (PFAM); IPR032629 (PFAM); IPR032817 (PFAM); mobidb-lite (MOBIDB_LITE); mobidb-lite (MOBIDB_LITE); IPR026829 (PANTHER); IPR016024 (SUPERFAMILY)	P:GO:0015031	P:protein transport
SPF_FS5_contig_530	[INTERPRO, BLASTED, MAPPED, GO-SLIM]	acyl-CoA dehydrogenase family member 10 isoform X1	3492	15	0	72.11	4	F:GO:0016627; F:GO:0016787; F:GO:0050660; P:GO:0055114	F:oxidoreductase activity, acting on the CH-CH group of donors; F:hydrolase activity; F:flavin adenine dinucleotide binding; P:oxidation-reduction process			IPR006439 (PRINTS); IPR023198 (G3DSA:1.10.150.GENE3D); G3DSA:3.90.1200.10 (GENE3D); IPR009075 (PFAM); IPR023214 (G3DSA:3.40.50.GENE3D); G3DSA:1.20.140.10 (GENE3D); G3DSA:2.40.110.10 (GENE3D); G3DSA:3.30.200.20 (GENE3D); IPR002575 (PFAM); IPR013786 (PFAM); IPR006439 (TIGRFAM); IPR041492 (PFAM); IPR037069 (G3DSA:1.10.540.GENE3D); IPR011945 (TIGRFAM); IPR006091 (PFAM); mobidb-lite (MOBIDB_LITE); PTH…	F:GO:0016627; F:GO:0016787; F:GO:0050660; P:GO:0055114	F:oxidoreductase activity, acting on the CH-CH group of donors; F:hydrolase activity; F:flavin adenine dinucleotide binding; P:oxidation-reduction process
SPF_FS5_contig_531	[INTERPRO, BLASTED, MAPPED, GO-SLIM]	cytochrome b (mitochondrion)	498	15	1.06731e-84	79.33	6	C:GO:0005743; P:GO:0006122; F:GO:0008121; C:GO:0016021; C:GO:0045275; F:GO:0046872	C:mitochondrial inner membrane; P:mitochondrial electron transport, ubiquinol to cytochrome c; F:ubiquinol-cytochrome-c reductase activity; C:integral component of membrane; C:respiratory chain complex III; F:metal ion binding	EC:1.10.2; EC:1.10.2.2	Acting on diphenols and related substances as donors; Acting on diphenols and related substances as donors	IPR005798 (PFAM); IPR027387 (G3DSA:1.20.810.GENE3D); PTHR19271 (PANTHER); IPR005798 (PROSITE_PROFILES); IPR005798 (CDD); IPR036150 (SUPERFAMILY)	F:GO:0009055; C:GO:0016020; F:GO:0016491	F:electron transfer activity; C:membrane; F:oxidoreductase activity
SPF_FS5_contig_532	[INTERPRO, BLASTED, MAPPED, GO-SLIM]	40S ribosomal protein S8	639	15	2.12014e-116	87.69	3	F:GO:0003735; C:GO:0005840; P:GO:0006412	F:structural constituent of ribosome; C:ribosome; P:translation			G3DSA:2.40.10.450 (GENE3D); IPR022309 (PFAM); G3DSA:1.10.168.20 (GENE3D); IPR001047 (TIGRFAM); mobidb-lite (MOBIDB_LITE); mobidb-lite (MOBIDB_LITE); PTHR10394:SF3 (PANTHER); IPR001047 (PANTHER); cd11380 (CDD)	F:GO:0003735; C:GO:0005622; C:GO:0005840; P:GO:0006412	F:structural constituent of ribosome; C:intracellular; C:ribosome; P:translation
SPF_FS5_contig_533	[INTERPRO, BLASTED, MAPPED, GO-SLIM]	DBH-like monooxygenase protein 1	1958	15	1.07042e-119	58.75	10	F:GO:0005507; C:GO:0012505; C:GO:0016020; F:GO:0016715; P:GO:0018958; C:GO:0043227; C:GO:0043229; C:GO:0044444; P:GO:0055114; P:GO:1901564	F:copper ion binding; C:endomembrane system; C:membrane; F:oxidoreductase activity, acting on paired donors, with incorporation or reduction of molecular oxygen, reduced ascorbate as one donor, and incorporation of one atom of oxygen; P:phenol-containing compound metabolic process; C:membrane-bounded organelle; C:intracellular organelle; C:obsolete cytoplasmic part; P:oxidation-reduction process;…			IPR028460 (PRINTS); IPR005018 (SMART); IPR005018 (PFAM); IPR036939 (G3DSA:2.60.120.GENE3D); IPR000323 (PFAM); IPR024548 (PFAM); IPR014784 (G3DSA:2.60.120.GENE3D); PTHR10157 (PANTHER); PTHR10157:SF23 (PANTHER); IPR005018 (PROSITE_PROFILES); cd09631 (CDD); IPR008977 (SUPERFAMILY); IPR008977 (SUPERFAMILY); SSF49344 (SUPERFAMILY)	F:GO:0003824; F:GO:0004497; F:GO:0005507; F:GO:0016715; P:GO:0055114	F:catalytic activity; F:monooxygenase activity; F:copper ion binding; F:oxidoreductase activity, acting on paired donors, with incorporation or reduction of molecular oxygen, reduced ascorbate as one donor, and incorporation of one atom of oxygen; P:oxidation-reduction process
SPF_FS5_contig_535	[INTERPRO, BLASTED, MAPPED, GO-SLIM]	DBH-like monooxygenase protein 1	2100	15	3.17602e-99	57.06	10	F:GO:0005507; C:GO:0012505; C:GO:0016020; F:GO:0016715; P:GO:0018958; C:GO:0043227; C:GO:0043229; C:GO:0044444; P:GO:0055114; P:GO:1901564	F:copper ion binding; C:endomembrane system; C:membrane; F:oxidoreductase activity, acting on paired donors, with incorporation or reduction of molecular oxygen, reduced ascorbate as one donor, and incorporation of one atom of oxygen; P:phenol-containing compound metabolic process; C:membrane-bounded organelle; C:intracellular organelle; C:obsolete cytoplasmic part; P:oxidation-reduction process;…			IPR028460 (PRINTS); IPR005018 (PFAM); IPR036939 (G3DSA:2.60.120.GENE3D); IPR014784 (G3DSA:2.60.120.GENE3D); IPR024548 (PFAM); IPR000323 (PFAM); PTHR10157 (PANTHER); PTHR10157:SF23 (PANTHER); IPR005018 (PROSITE_PROFILES); cd09631 (CDD); IPR008977 (SUPERFAMILY); IPR008977 (SUPERFAMILY)	F:GO:0003824; F:GO:0004497; F:GO:0005507; F:GO:0016715; P:GO:0055114	F:catalytic activity; F:monooxygenase activity; F:copper ion binding; F:oxidoreductase activity, acting on paired donors, with incorporation or reduction of molecular oxygen, reduced ascorbate as one donor, and incorporation of one atom of oxygen; P:oxidation-reduction process
SPF_FS5_contig_536	[BLASTED, MAPPED, ANNOTATED]	F-box only protein 15	2007	15	2.05542e-31	55.34	1	C:GO:0048188	C:Set1C/COMPASS complex
SPF_FS5_contig_537	[INTERPRO, BLASTED, MAPPED, GO-SLIM]	methylthioribulose-1-phosphate dehydratase	835	15	1.6649e-125	86.54	6	C:GO:0005737; P:GO:0006915; F:GO:0008270; P:GO:0019284; P:GO:0019509; F:GO:0046570	C:cytoplasm; P:apoptotic process; F:zinc ion binding; P:L-methionine salvage from S-adenosylmethionine; P:L-methionine salvage from methylthioadenosine; F:methylthioribulose 1-phosphate dehydratase activity	EC:4.2.1.109	Methylthioribulose 1-phosphate dehydratase	IPR001303 (SMART); IPR036409 (G3DSA:3.40.225.GENE3D); IPR017714 (TIGRFAM); IPR001303 (PFAM); IPR017714 (PANTHER); IPR027514 (HAMAP); IPR036409 (SUPERFAMILY)	C:GO:0005737; P:GO:0019509; F:GO:0046872	C:cytoplasm; P:L-methionine salvage from methylthioadenosine; F:metal ion binding
SPF_FS5_contig_539	[INTERPRO, BLASTED, MAPPED, GO-SLIM]	thioredoxin reductase 1, cytoplasmic-like	2451	15	0	79.69	8	F:GO:0004791; C:GO:0005739; F:GO:0009055; F:GO:0015035; P:GO:0022900; P:GO:0045454; F:GO:0050660; P:GO:0098869	F:thioredoxin-disulfide reductase activity; C:mitochondrion; F:electron transfer activity; F:protein disulfide oxidoreductase activity; P:electron transport chain; P:cell redox homeostasis; F:flavin adenine dinucleotide binding; P:cellular oxidant detoxification	EC:1.8.1.9	Thioredoxin-disulfide reductase	PR00368 (PRINTS); PR00411 (PRINTS); IPR036188 (G3DSA:3.50.50.GENE3D); IPR004099 (PFAM); IPR016156 (G3DSA:3.30.390.GENE3D); G3DSA:3.40.30.10 (GENE3D); IPR036188 (G3DSA:3.50.50.GENE3D); IPR002109 (PFAM); IPR006338 (TIGRFAM); IPR011899 (TIGRFAM); IPR001100 (PIRSF); IPR023753 (PFAM); mobidb-lite (MOBIDB_LITE); PTHR43256:SF3 (PANTHER); PTHR43256 (PANTHER); IPR002109 (PROSITE_PROFILES); cd03419 (CDD); …	F:GO:0004791; F:GO:0009055; F:GO:0015035; F:GO:0016491; P:GO:0045454; F:GO:0050660; P:GO:0055114	F:thioredoxin-disulfide reductase activity; F:electron transfer activity; F:protein disulfide oxidoreductase activity; F:oxidoreductase activity; P:cell redox homeostasis; F:flavin adenine dinucleotide binding; P:oxidation-reduction process
SPF_FS5_contig_540	[INTERPRO, BLASTED, MAPPED, GO-SLIM]	Mitochondrial calcium uniporter regulator 1	3914	15	3.42948e-40	67.54	2	C:GO:0005739; P:GO:0055085	C:mitochondrion; P:transmembrane transport			IPR024461 (PFAM); IPR024461 (PANTHER)	no GO terms	no GO terms
SPF_FS5_contig_542	[INTERPRO, BLASTED, MAPPED, GO-SLIM]	forkhead box protein N3 isoform X1	2693	15	1.77937e-58	66.77	5	F:GO:0003677; F:GO:0003700; C:GO:0005634; P:GO:0009058; P:GO:0034641	F:DNA binding; F:DNA-binding transcription factor activity; C:nucleus; P:biosynthetic process; P:cellular nitrogen compound metabolic process			IPR001766 (PRINTS); IPR001766 (SMART); IPR036388 (G3DSA:1.10.10.GENE3D); IPR001766 (PFAM); mobidb-lite (MOBIDB_LITE); mobidb-lite (MOBIDB_LITE); mobidb-lite (MOBIDB_LITE); mobidb-lite (MOBIDB_LITE); mobidb-lite (MOBIDB_LITE); mobidb-lite (MOBIDB_LITE); mobidb-lite (MOBIDB_LITE); mobidb-lite (MOBIDB_LITE); mobidb-lite (MOBIDB_LITE); PTHR13962 (PANTHER); IPR001766 (PROSITE_PROFILES); IPR001766 (CDD…	F:GO:0003700; P:GO:0006355; F:GO:0043565	F:DNA-binding transcription factor activity; P:regulation of transcription, DNA-templated; F:sequence-specific DNA binding
SPF_FS5_contig_543	[INTERPRO, BLASTED, MAPPED, GO-SLIM]	probable phospholipid-transporting ATPase IF isoform X8	3553	15	0	62.28	5	F:GO:0000287; F:GO:0005524; P:GO:0015914; C:GO:0016021; F:GO:0140326	F:magnesium ion binding; F:ATP binding; P:phospholipid transport; C:integral component of membrane; F:ATPase-coupled intramembrane lipid transporter activity			PR00119 (PRINTS); IPR032630 (PFAM); PF13246 (PFAM); IPR006539 (TIGRFAM); G3DSA:2.70.150.10 (GENE3D); IPR023214 (G3DSA:3.40.50.GENE3D); IPR023299 (G3DSA:3.40.1110.GENE3D); IPR032631 (PFAM); IPR001757 (TIGRFAM); PF00122 (PFAM),SFLDF00027 (SFLD),SFLDG00002 (SFLD); PTHR24092:SF68 (PANTHER); IPR006539 (PANTHER); cd02073 (CDD); IPR036412 (SUPERFAMILY); IPR008250 (SUPERFAMILY); IPR023299 (SUPERFAMILY); …	F:GO:0000166; F:GO:0000287; F:GO:0005524; P:GO:0015914; C:GO:0016021; F:GO:0140326	F:nucleotide binding; F:magnesium ion binding; F:ATP binding; P:phospholipid transport; C:integral component of membrane; F:ATPase-coupled intramembrane lipid transporter activity
SPF_FS5_contig_544	[INTERPRO, BLASTED, MAPPED, GO-SLIM]	paired box protein Pax-6-like isoform X1	7405	15	6.58799e-138	69.38	2	F:GO:0003677; P:GO:0006355	F:DNA binding; P:regulation of transcription, DNA-templated			IPR001523 (PRINTS); IPR001523 (SMART); IPR001356 (SMART); IPR036388 (G3DSA:1.10.10.GENE3D); IPR036388 (G3DSA:1.10.10.GENE3D); IPR001523 (PFAM); IPR001356 (PFAM); G3DSA:1.10.10.60 (GENE3D); mobidb-lite (MOBIDB_LITE); mobidb-lite (MOBIDB_LITE); mobidb-lite (MOBIDB_LITE); PTHR24329:SF502 (PANTHER); PTHR24329 (PANTHER); IPR001523 (PROSITE_PROFILES); IPR001356 (PROSITE_PROFILES); IPR001356 (CDD); IPR0…	F:GO:0003677; P:GO:0006355	F:DNA binding; P:regulation of transcription, DNA-templated
SPF_FS5_contig_551	[INTERPRO, BLASTED, MAPPED, GO-SLIM]	receptor-type tyrosine-protein phosphatase F-like isoform X1	1324	15	1.34198e-31	64.56	3	F:GO:0005515; P:GO:0016311; F:GO:0016791	F:protein binding; P:dephosphorylation; F:phosphatase activity			PR00014 (PRINTS); IPR003961 (SMART); IPR003961 (PFAM); IPR013783 (G3DSA:2.60.40.GENE3D); IPR013783 (G3DSA:2.60.40.GENE3D); PTHR19134 (PANTHER); PTHR19134:SF203 (PANTHER); IPR003961 (PROSITE_PROFILES); IPR003961 (PROSITE_PROFILES); IPR003961 (CDD); IPR003961 (CDD); IPR036116 (SUPERFAMILY)	F:GO:0005515	F:protein binding
SPF_FS5_contig_552	[INTERPRO, BLASTED, MAPPED, GO-SLIM]	pancreatic alpha-amylase-like	891	15	6.45943e-104	70.51	3	P:GO:0005975; F:GO:0016798; F:GO:0043169	P:carbohydrate metabolic process; F:hydrolase activity, acting on glycosyl bonds; F:cation binding			IPR006046 (PRINTS); IPR006047 (SMART); IPR006047 (PFAM); G3DSA:3.20.20.80 (GENE3D); PTHR43447 (PANTHER); PTHR43447:SF7 (PANTHER); cd11317 (CDD); IPR017853 (SUPERFAMILY)	F:GO:0003824; P:GO:0005975; F:GO:0043169	F:catalytic activity; P:carbohydrate metabolic process; F:cation binding
SPF_FS5_contig_554	[INTERPRO, BLASTED, MAPPED, GO-SLIM]	asparagine--tRNA ligase, cytoplasmic	2212	15	0	86.21	8	F:GO:0003676; F:GO:0004816; F:GO:0005524; P:GO:0006260; P:GO:0006281; P:GO:0006421; F:GO:0017108; C:GO:0033557	F:nucleic acid binding; F:asparagine-tRNA ligase activity; F:ATP binding; P:DNA replication; P:DNA repair; P:asparaginyl-tRNA aminoacylation; F:5'-flap endonuclease activity; C:Slx1-Slx4 complex	EC:3.1.30; EC:3.1.21; EC:6.1.1.22	Acting on ester bonds; Acting on ester bonds; Asparagine--tRNA ligase	IPR002312 (PRINTS); G3DSA:3.30.930.10 (GENE3D); IPR004364 (PFAM); IPR004522 (TIGRFAM); G3DSA:1.10.10.1430 (GENE3D); IPR004365 (PFAM); G3DSA:2.40.50.140 (GENE3D); PTHR22594 (PANTHER); PTHR22594:SF16 (PANTHER); IPR006195 (PROSITE_PROFILES); cd04323 (CDD); cd00776 (CDD); IPR012340 (SUPERFAMILY); SSF55681 (SUPERFAMILY)	F:GO:0000166; F:GO:0003676; F:GO:0004812; F:GO:0004816; F:GO:0005524; P:GO:0006418; P:GO:0006421	F:nucleotide binding; F:nucleic acid binding; F:aminoacyl-tRNA ligase activity; F:asparagine-tRNA ligase activity; F:ATP binding; P:tRNA aminoacylation for protein translation; P:asparaginyl-tRNA aminoacylation
SPF_FS5_contig_556	[INTERPRO, BLASTED, MAPPED, GO-SLIM]	tubulin alpha-3 chain-like	660	15	1.01953e-163	100	7	P:GO:0000226; P:GO:0000278; F:GO:0003924; F:GO:0005200; F:GO:0005525; C:GO:0005737; C:GO:0005874	P:microtubule cytoskeleton organization; P:mitotic cell cycle; F:GTPase activity; F:structural constituent of cytoskeleton; F:GTP binding; C:cytoplasm; C:microtubule	EC:3.6.1.15	Nucleoside-triphosphate phosphatase	IPR002452 (PRINTS); IPR000217 (PRINTS); IPR018316 (SMART); IPR037103 (G3DSA:3.30.1330.GENE3D); IPR003008 (PFAM); IPR036525 (G3DSA:3.40.50.GENE3D); IPR018316 (PFAM); IPR000217 (PANTHER); PTHR11588:SF257 (PANTHER); IPR036525 (SUPERFAMILY); IPR008280 (SUPERFAMILY)	F:GO:0003924; F:GO:0005200; F:GO:0005525; C:GO:0005874; P:GO:0007017	F:GTPase activity; F:structural constituent of cytoskeleton; F:GTP binding; C:microtubule; P:microtubule-based process
SPF_FS5_contig_557	[INTERPRO, BLASTED, MAPPED, GO-SLIM]	bifunctional 3'-phosphoadenosine 5'-phosphosulfate synthase isoform X2	2202	15	0	87.89	4	P:GO:0006790; F:GO:0016301; F:GO:0016779; F:GO:0043167	P:sulfur compound metabolic process; F:kinase activity; F:nucleotidyltransferase activity; F:ion binding	EC:2.7.7.4; EC:2.7.1.25	Sulfate adenylyltransferase; Adenylyl-sulfate kinase	IPR024951 (PFAM); IPR014729 (G3DSA:3.40.50.GENE3D); IPR025980 (PFAM); G3DSA:3.10.400.10 (GENE3D); IPR002891 (TIGRFAM); G3DSA:3.40.50.300 (GENE3D); IPR002650 (TIGRFAM); PF01583 (PFAM); PTHR11055 (PANTHER); PTHR11055:SF17 (PANTHER); IPR002891 (HAMAP); IPR002650 (CDD); IPR002891 (CDD); SSF52374 (SUPERFAMILY); IPR027417 (SUPERFAMILY); IPR015947 (SUPERFAMILY)	P:GO:0000103; F:GO:0004020; F:GO:0004781; F:GO:0005524	P:sulfate assimilation; F:adenylylsulfate kinase activity; F:sulfate adenylyltransferase (ATP) activity; F:ATP binding
SPF_FS5_contig_558	[BLASTED, MAPPED, ANNOTATED]	cilia- and flagella-associated protein 65-like	5809	15	0	62.63	1	C:GO:0031514	C:motile cilium
SPF_FS5_contig_559	[INTERPRO, BLASTED, MAPPED, GO-SLIM]	Tubulin alpha-1A chain	587	15	2.53995e-143	99.76	6	F:GO:0003924; F:GO:0005198; C:GO:0005737; C:GO:0005856; P:GO:0007010; F:GO:0043167	F:GTPase activity; F:structural molecule activity; C:cytoplasm; C:cytoskeleton; P:cytoskeleton organization; F:ion binding	EC:3.6.1.15	Nucleoside-triphosphate phosphatase	IPR000217 (PRINTS); IPR002452 (PRINTS); IPR003008 (SMART); IPR018316 (SMART); IPR018316 (PFAM); IPR036525 (G3DSA:3.40.50.GENE3D); IPR037103 (G3DSA:3.30.1330.GENE3D); IPR003008 (PFAM); PTHR11588:SF237 (PANTHER); IPR000217 (PANTHER); IPR036525 (SUPERFAMILY); IPR008280 (SUPERFAMILY)	F:GO:0003924; F:GO:0005200; F:GO:0005525; C:GO:0005874; P:GO:0007017	F:GTPase activity; F:structural constituent of cytoskeleton; F:GTP binding; C:microtubule; P:microtubule-based process
SPF_FS5_contig_560	[BLASTED, MAPPED, ANNOTATED]	membrane-spanning 4-domains subfamily A member 4A isoform X3	1223	2	8.66516e-06	49.45	1	C:GO:0016020	C:membrane
SPF_FS5_contig_561	[BLASTED, MAPPED, ANNOTATED]	membrane-spanning 4-domains subfamily A member 8	727	6	7.36061e-06	52.27	1	C:GO:0016020	C:membrane
SPF_FS5_contig_562	[INTERPRO, BLASTED, MAPPED, GO-SLIM]	beta-1,3-glucan-binding protein-like	1543	15	2.63231e-105	59.24	3	F:GO:0004553; P:GO:0005975; F:GO:0030246	F:hydrolase activity, hydrolyzing O-glycosyl compounds; P:carbohydrate metabolic process; F:carbohydrate binding			IPR000757 (PFAM); G3DSA:2.60.40.2140 (GENE3D); IPR031756 (PFAM); PTHR10963:SF55 (PANTHER); PTHR10963 (PANTHER); IPR000757 (PROSITE_PROFILES); IPR013320 (SUPERFAMILY)	F:GO:0004553; P:GO:0005975; F:GO:0030246	F:hydrolase activity, hydrolyzing O-glycosyl compounds; P:carbohydrate metabolic process; F:carbohydrate binding
SPF_FS5_contig_563	[INTERPRO, BLASTED, MAPPED, GO-SLIM]	ras-related protein Rab-5B-like	1834	15	1.63416e-125	86.97	2	F:GO:0003924; F:GO:0043167	F:GTPase activity; F:ion binding	EC:3.6.1.15	Nucleoside-triphosphate phosphatase	PR00449 (PRINTS); SM00175 (SMART); SM00174 (SMART); SM00173 (SMART); SM00176 (SMART); IPR005225 (TIGRFAM); G3DSA:3.40.50.300 (GENE3D); IPR001806 (PFAM); mobidb-lite (MOBIDB_LITE); mobidb-lite (MOBIDB_LITE); PTHR24073 (PANTHER); PTHR24073:SF555 (PANTHER); PS51419 (PROSITE_PROFILES); cd01860 (CDD); IPR027417 (SUPERFAMILY)	F:GO:0003924; F:GO:0005525	F:GTPase activity; F:GTP binding
SPF_FS5_contig_566	[INTERPRO, BLASTED, MAPPED, GO-SLIM]	vacuolar protein sorting-associated protein 29	1391	15	1.45119e-112	94.22	3	C:GO:0005829; P:GO:0016192; C:GO:0032991	C:cytosol; P:vesicle-mediated transport; C:protein-containing complex			IPR024654 (PFAM); IPR029052 (G3DSA:3.60.21.GENE3D); IPR000979 (TIGRFAM); IPR000979 (PANTHER); IPR028661 (PTHR11124:PANTHER); IPR028661 (CDD); SSF56300 (SUPERFAMILY)	C:GO:0030904; P:GO:0042147	C:retromer complex; P:retrograde transport, endosome to Golgi
SPF_FS5_contig_567	[INTERPRO, BLASTED, MAPPED, GO-SLIM]	protein arginine N-methyltransferase 1 isoform X1	1528	15	0	86.57	2	P:GO:0006464; F:GO:0008168	P:cellular protein modification process; F:methyltransferase activity			G3DSA:3.40.50.150 (GENE3D); G3DSA:2.70.160.11 (GENE3D); IPR041698 (PFAM); PTHR11006:SF54 (PANTHER); PTHR11006 (PANTHER); IPR025799 (PROSITE_PROFILES); cd02440 (CDD); IPR029063 (SUPERFAMILY)	P:GO:0006479; F:GO:0008168	P:protein methylation; F:methyltransferase activity
SPF_FS5_contig_569	[INTERPRO, BLASTED, MAPPED, GO-SLIM]	nuclear receptor	3698	15	4.51756e-31	73.36	7	F:GO:0003700; C:GO:0005634; P:GO:0006355; P:GO:0007165; F:GO:0008270; F:GO:0038023; F:GO:0043565	F:DNA-binding transcription factor activity; C:nucleus; P:regulation of transcription, DNA-templated; P:signal transduction; F:zinc ion binding; F:signaling receptor activity; F:sequence-specific DNA binding			IPR001628 (PRINTS); IPR001628 (SMART); IPR001628 (PFAM); G3DSA:1.10.565.10 (GENE3D); IPR013088 (G3DSA:3.30.50.GENE3D); mobidb-lite (MOBIDB_LITE); mobidb-lite (MOBIDB_LITE); mobidb-lite (MOBIDB_LITE); mobidb-lite (MOBIDB_LITE); PTHR24082:SF473 (PANTHER); PTHR24082 (PANTHER); IPR001628 (PROSITE_PROFILES); cd06916 (CDD); IPR035500 (SUPERFAMILY); SSF57716 (SUPERFAMILY)	F:GO:0003700; C:GO:0005634; P:GO:0006355; F:GO:0008270; F:GO:0043565	F:DNA-binding transcription factor activity; C:nucleus; P:regulation of transcription, DNA-templated; F:zinc ion binding; F:sequence-specific DNA binding
SPF_FS5_contig_571	[INTERPRO, BLASTED, MAPPED, GO-SLIM]	zinc finger protein 678-like	680	15	2.09508e-85	73.71	4	F:GO:0003700; C:GO:0005654; F:GO:0044212; P:GO:0045944	F:DNA-binding transcription factor activity; C:nucleoplasm; F:transcription regulatory region DNA binding; P:positive regulation of transcription by RNA polymerase II			IPR013087 (SMART); G3DSA:3.30.160.60 (GENE3D); G3DSA:3.30.160.60 (GENE3D); G3DSA:3.30.160.60 (GENE3D); G3DSA:3.30.160.60 (GENE3D); IPR013087 (PFAM); PF13894 (PFAM); G3DSA:3.30.160.60 (GENE3D); G3DSA:3.30.160.60 (GENE3D); PTHR43960 (PANTHER); PTHR43960:SF4 (PANTHER); PTHR43960:SF4 (PANTHER); IPR013087 (PROSITE_PROFILES); IPR013087 (PROSITE_PROFILES); IPR013087 (PROSITE_PROFILES); IPR013087 (PROSIT…	F:GO:0003676	F:nucleic acid binding
SPF_FS5_contig_572	[INTERPRO, BLASTED, MAPPED, GO-SLIM]	zinc finger protein 208-like	1114	15	2.10791e-104	74.7	4	F:GO:0003700; C:GO:0005654; F:GO:0044212; P:GO:0045944	F:DNA-binding transcription factor activity; C:nucleoplasm; F:transcription regulatory region DNA binding; P:positive regulation of transcription by RNA polymerase II			IPR013087 (SMART); G3DSA:3.30.160.60 (GENE3D); G3DSA:3.30.160.60 (GENE3D); PF13912 (PFAM); G3DSA:3.30.160.60 (GENE3D); G3DSA:3.30.160.60 (GENE3D); IPR013087 (PFAM); G3DSA:3.30.160.60 (GENE3D); G3DSA:3.30.160.60 (GENE3D); G3DSA:3.30.160.60 (GENE3D); IPR022755 (PFAM); PTHR43960:SF2 (PANTHER); PTHR43960:SF2 (PANTHER); PTHR43960 (PANTHER); PTHR43960 (PANTHER); IPR013087 (PROSITE_PROFILES); IPR013087 …	F:GO:0003676	F:nucleic acid binding
SPF_FS5_contig_573	[INTERPRO, BLASTED, MAPPED, GO-SLIM]	adenosine kinase 1	1703	15	2.47814e-149	72.74	3	F:GO:0004001; P:GO:0006166; P:GO:0006796	F:adenosine kinase activity; P:purine ribonucleoside salvage; P:phosphate-containing compound metabolic process			IPR001805 (PRINTS); G3DSA:3.30.1110.10 (GENE3D); IPR029056 (G3DSA:3.40.1190.GENE3D); IPR011611 (PFAM); PTHR10584:SF24 (PANTHER); PTHR10584 (PANTHER); cd01168 (CDD); IPR029056 (SUPERFAMILY)	F:GO:0004001; P:GO:0006166	F:adenosine kinase activity; P:purine ribonucleoside salvage
SPF_FS5_contig_574	[INTERPRO, BLASTED, MAPPED, GO-SLIM]	Fas-associated death domain protein	993	15	4.08074e-23	53.04	3	F:GO:0005515; P:GO:0007165; P:GO:0042981	F:protein binding; P:signal transduction; P:regulation of apoptotic process			IPR000488 (SMART); IPR001875 (SMART); IPR001875 (PFAM); G3DSA:1.10.533.10 (GENE3D); G3DSA:1.10.533.10 (GENE3D); IPR000488 (PFAM); PTHR15077 (PANTHER); IPR001875 (PROSITE_PROFILES); IPR000488 (PROSITE_PROFILES); cd08336 (CDD); cd01670 (CDD); IPR011029 (SUPERFAMILY); IPR011029 (SUPERFAMILY)	F:GO:0005515; P:GO:0007165; P:GO:0042981	F:protein binding; P:signal transduction; P:regulation of apoptotic process
SPF_FS5_contig_576	[INTERPRO, BLASTED, MAPPED, GO-SLIM]	cyclin-dependent kinase-like 1 isoform X4	1914	15	0	86.11	5	F:GO:0004693; F:GO:0005524; C:GO:0005634; P:GO:0006468; P:GO:0051726	F:cyclin-dependent protein serine/threonine kinase activity; F:ATP binding; C:nucleus; P:protein phosphorylation; P:regulation of cell cycle	EC:2.7.11; EC:2.7.11.22	Transferring phosphorus-containing groups; Cyclin-dependent kinase	IPR000719 (SMART); G3DSA:3.30.200.20 (GENE3D); G3DSA:1.10.510.10 (GENE3D); PIRSF000654 (PIRSF); IPR000719 (PFAM); mobidb-lite (MOBIDB_LITE); PTHR24056:SF222 (PANTHER); PTHR24056 (PANTHER); IPR000719 (PROSITE_PROFILES); cd07847 (CDD); IPR011009 (SUPERFAMILY)	F:GO:0004672; F:GO:0005524; P:GO:0006468	F:protein kinase activity; F:ATP binding; P:protein phosphorylation
SPF_FS5_contig_577	[INTERPRO, BLASTED, MAPPED, GO-SLIM]	transient receptor potential cation channel subfamily A member 1-like	2155	15	2.1302e-52	50.31	3	F:GO:0005216; C:GO:0016021; P:GO:0034220	F:ion channel activity; C:integral component of membrane; P:ion transmembrane transport			IPR005821 (PFAM); mobidb-lite (MOBIDB_LITE); mobidb-lite (MOBIDB_LITE); IPR030288 (PANTHER)	F:GO:0005216; P:GO:0006811; C:GO:0016020; C:GO:0016021; P:GO:0034220; P:GO:0055085	F:ion channel activity; P:ion transport; C:membrane; C:integral component of membrane; P:ion transmembrane transport; P:transmembrane transport
SPF_FS5_contig_578	[INTERPRO, BLASTED, MAPPED, GO-SLIM]	collagen alpha-1(II) chain	4885	15	1.23449e-46	53.2	5	F:GO:0005198; C:GO:0005615; P:GO:0030198; C:GO:0031012; P:GO:0048856	F:structural molecule activity; C:extracellular space; P:extracellular matrix organization; C:extracellular matrix; P:anatomical structure development			IPR000885 (SMART); IPR000885 (PFAM); G3DSA:2.60.120.1000 (GENE3D); IPR008160 (PFAM); mobidb-lite (MOBIDB_LITE); mobidb-lite (MOBIDB_LITE); mobidb-lite (MOBIDB_LITE); mobidb-lite (MOBIDB_LITE); PTHR44092 (PANTHER); IPR000885 (PRODOM); IPR000885 (PROSITE_PROFILES)	F:GO:0005201	F:extracellular matrix structural constituent
SPF_FS5_contig_579	[INTERPRO, BLASTED, MAPPED, GO-SLIM]	enoyl-CoA hydratase, mitochondrial	1035	15	7.45875e-138	82.82	3	F:GO:0004300; C:GO:0005739; P:GO:0006635	F:enoyl-CoA hydratase activity; C:mitochondrion; P:fatty acid beta-oxidation	EC:4.2.1.17	Enoyl-CoA hydratase	G3DSA:3.90.226.10 (GENE3D); IPR014748 (G3DSA:1.10.12.GENE3D); IPR001753 (PFAM); PTHR11941 (PANTHER); PTHR11941:SF54 (PANTHER); cd06558 (CDD); IPR029045 (SUPERFAMILY)	F:GO:0003824	F:catalytic activity
SPF_FS5_contig_581	[BLASTED, MAPPED, ANNOTATED]	Transposable element Tc1 transposase	4050	15	1.22398e-27	49.38	1	P:GO:0006259	P:DNA metabolic process
SPF_FS5_contig_587	[INTERPRO, BLASTED, MAPPED, GO-SLIM]	60S ribosomal protein L13	743	15	1.00091e-77	81.98	3	F:GO:0003735; C:GO:0005840; P:GO:0006412	F:structural constituent of ribosome; C:ribosome; P:translation			IPR001380 (PFAM); mobidb-lite (MOBIDB_LITE); IPR001380 (PANTHER); IPR001380 (HAMAP)	F:GO:0003735; C:GO:0005622; C:GO:0005840; P:GO:0006412	F:structural constituent of ribosome; C:intracellular; C:ribosome; P:translation
SPF_FS5_contig_588	[INTERPRO, BLASTED, MAPPED, GO-SLIM]	DNA-binding protein HEXBP-like isoform X2	1300	15	7.08221e-27	53.29	2	F:GO:0003676; F:GO:0008270	F:nucleic acid binding; F:zinc ion binding			IPR001878 (SMART); G3DSA:4.10.60.10 (GENE3D); G3DSA:4.10.60.10 (GENE3D); IPR001878 (PFAM); mobidb-lite (MOBIDB_LITE); PTHR23002 (PANTHER); IPR001878 (PROSITE_PROFILES); IPR001878 (PROSITE_PROFILES); IPR001878 (PROSITE_PROFILES); IPR001878 (PROSITE_PROFILES); IPR001878 (PROSITE_PROFILES); IPR001878 (PROSITE_PROFILES); IPR036875 (SUPERFAMILY); IPR036875 (SUPERFAMILY); IPR036875 (SUPERFAMILY); IPR03…	F:GO:0003676; F:GO:0008270	F:nucleic acid binding; F:zinc ion binding
SPF_FS5_contig_589	[INTERPRO, BLASTED, MAPPED, GO-SLIM]	heat shock protein 70	544	15	7.37512e-50	90.77	8	C:GO:0005634; C:GO:0005829; P:GO:0006950; P:GO:0007568; P:GO:0016192; F:GO:0016887; F:GO:0043167; P:GO:0048856	C:nucleus; C:cytosol; P:response to stress; P:aging; P:vesicle-mediated transport; F:ATPase activity; F:ion binding; P:anatomical structure development	EC:3.6.1.3; EC:3.6.1.15	Adenosinetriphosphatase; Nucleoside-triphosphate phosphatase	IPR029048 (G3DSA:1.20.1270.GENE3D); IPR013126 (PFAM); mobidb-lite (MOBIDB_LITE); mobidb-lite (MOBIDB_LITE); IPR013126 (PANTHER); PTHR19375:SF310 (PANTHER); IPR029048 (SUPERFAMILY)	no GO terms	no GO terms
SPF_FS5_contig_590	[INTERPRO, BLASTED, MAPPED, GO-SLIM]	hippocampus abundant transcript 1 protein-like	1887	15	0	80.28	3	F:GO:0003674; C:GO:0005575; P:GO:0055085	F:molecular_function; C:cellular_component; P:transmembrane transport			IPR001958 (PRINTS); G3DSA:1.20.1250.20 (GENE3D); IPR011701 (PFAM); mobidb-lite (MOBIDB_LITE); PTHR23504:SF75 (PANTHER); PTHR23504 (PANTHER); IPR020846 (PROSITE_PROFILES); IPR020846 (CDD); IPR036259 (SUPERFAMILY)	F:GO:0005215; C:GO:0016021; P:GO:0055085	F:transporter activity; C:integral component of membrane; P:transmembrane transport
SPF_FS5_contig_591	[INTERPRO, BLASTED, MAPPED, GO-SLIM]	sodium- and chloride-dependent glycine transporter 1-like	3096	15	2.12605e-171	61.33	3	F:GO:0005328; P:GO:0006810; C:GO:0016021	F:neurotransmitter:sodium symporter activity; P:transport; C:integral component of membrane			IPR000175 (PRINTS); IPR000175 (PFAM); PTHR11616:SF241 (PANTHER); IPR000175 (PANTHER); IPR000175 (PROSITE_PROFILES); IPR037272 (SUPERFAMILY)	F:GO:0005328; C:GO:0016021	F:neurotransmitter:sodium symporter activity; C:integral component of membrane
SPF_FS5_contig_592	[INTERPRO, BLASTED, MAPPED, GO-SLIM]	pre-rRNA-processing protein TSR2 homolog	958	15	2.04446e-30	67.16	2	P:GO:0034641; P:GO:0042254	P:cellular nitrogen compound metabolic process; P:ribosome biogenesis			IPR019398 (PFAM); mobidb-lite (MOBIDB_LITE); mobidb-lite (MOBIDB_LITE); mobidb-lite (MOBIDB_LITE); IPR019398 (PANTHER); PTHR21250:SF0 (PANTHER)	no GO terms	no GO terms
SPF_FS5_contig_595	[INTERPRO, BLASTED, MAPPED, GO-SLIM]	vesicle-fusing ATPase 1	2616	15	0	75.62	3	P:GO:0016192; F:GO:0016887; F:GO:0043167	P:vesicle-mediated transport; F:ATPase activity; F:ion binding	EC:3.6.1.3; EC:3.6.1.15	Adenosinetriphosphatase; Nucleoside-triphosphate phosphatase	IPR003338 (SMART); IPR003593 (SMART); G3DSA:3.10.330.10 (GENE3D); IPR003338 (PFAM); G3DSA:2.40.40.20 (GENE3D); IPR003959 (PFAM); G3DSA:3.40.50.300 (GENE3D); G3DSA:3.40.50.300 (GENE3D); G3DSA:1.10.8.60 (GENE3D); G3DSA:1.10.8.60 (GENE3D); IPR041569 (PFAM); PTHR23078:SF3 (PANTHER); IPR039812 (PANTHER); cd00009 (CDD); cd00009 (CDD); IPR027417 (SUPERFAMILY); IPR029067 (SUPERFAMILY); IPR027417 (SUPERFA…	F:GO:0005524; F:GO:0016887; P:GO:0035494	F:ATP binding; F:ATPase activity; P:SNARE complex disassembly
SPF_FS5_contig_596	[INTERPRO, BLASTED, MAPPED, GO-SLIM]	microtubule-associated protein futsch	3421	15	7.52426e-17	62.87	15	P:GO:0000226; C:GO:0005874; C:GO:0005875; P:GO:0007409; F:GO:0008017; P:GO:0008088; P:GO:0008355; P:GO:0008582; F:GO:0019900; C:GO:0030424; C:GO:0030425; C:GO:0043025; P:GO:0043524; P:GO:0048813; P:GO:0060052	P:microtubule cytoskeleton organization; C:microtubule; C:microtubule associated complex; P:axonogenesis; F:microtubule binding; P:axo-dendritic transport; P:olfactory learning; P:regulation of synaptic growth at neuromuscular junction; F:kinase binding; C:axon; C:dendrite; C:neuronal cell body; P:negative regulation of neuron apoptotic process; P:dendrite morphogenesis; P:neurofilament cytoskele…			mobidb-lite (MOBIDB_LITE); mobidb-lite (MOBIDB_LITE); mobidb-lite (MOBIDB_LITE); mobidb-lite (MOBIDB_LITE); mobidb-lite (MOBIDB_LITE); mobidb-lite (MOBIDB_LITE); mobidb-lite (MOBIDB_LITE); mobidb-lite (MOBIDB_LITE); IPR026074 (PANTHER)	P:GO:0000226; C:GO:0005874; F:GO:0008017	P:microtubule cytoskeleton organization; C:microtubule; F:microtubule binding
SPF_FS5_contig_597	[INTERPRO, BLASTED, MAPPED, GO-SLIM]	V-type proton ATPase 16 kDa proteolipid subunit	1277	15	4.06987e-66	91.7	11	C:GO:0005764; C:GO:0005794; P:GO:0007042; F:GO:0008553; C:GO:0016021; C:GO:0016471; P:GO:0030177; F:GO:0031625; C:GO:0033179; F:GO:0046961; P:GO:1902600	C:lysosome; C:Golgi apparatus; P:lysosomal lumen acidification; F:proton-exporting ATPase activity, phosphorylative mechanism; C:integral component of membrane; C:vacuolar proton-transporting V-type ATPase complex; P:positive regulation of Wnt signaling pathway; F:ubiquitin protein ligase binding; C:proton-transporting V-type ATPase, V0 domain; F:proton-transporting ATPase activity, rotational me…	EC:3.6.1.3; EC:3.6.3.6; EC:3.6.1.15	Adenosinetriphosphatase; Acting on acid anhydrides; Nucleoside-triphosphate phosphatase	IPR000245 (PRINTS); IPR011555 (TIGRFAM); G3DSA:1.20.120.610 (GENE3D); IPR002379 (PFAM); PTHR10263 (PANTHER); PTHR10263:SF5 (PANTHER); IPR035921 (SUPERFAMILY)	F:GO:0015078; C:GO:0033177; C:GO:0033179; P:GO:1902600	F:proton transmembrane transporter activity; C:proton-transporting two-sector ATPase complex, proton-transporting domain; C:proton-transporting V-type ATPase, V0 domain; P:proton transmembrane transport
SPF_FS5_contig_599	[INTERPRO, BLASTED, MAPPED, GO-SLIM]	phosphoenolpyruvate carboxykinase, cytosolic [GTP]-like isoform X3	2349	15	0	78.39	6	F:GO:0004613; F:GO:0005525; P:GO:0006094; F:GO:0016301; P:GO:0016310; F:GO:0046872	F:phosphoenolpyruvate carboxykinase (GTP) activity; F:GTP binding; P:gluconeogenesis; F:kinase activity; P:phosphorylation; F:metal ion binding	EC:4.1.1.32	Phosphoenolpyruvate carboxykinase (GTP)	G3DSA:2.170.8.10 (GENE3D); IPR035077 (PFAM); IPR008209 (PIRSF); IPR013035 (G3DSA:3.90.228.GENE3D); IPR035078 (PFAM); IPR008210 (G3DSA:3.40.449.GENE3D); PTHR11561:SF11 (PANTHER); IPR008209 (PANTHER); IPR008209 (HAMAP); IPR008209 (CDD); SSF53795 (SUPERFAMILY); IPR008210 (SUPERFAMILY)	F:GO:0004611; F:GO:0005525; P:GO:0006094; F:GO:0017076	F:phosphoenolpyruvate carboxykinase activity; F:GTP binding; P:gluconeogenesis; F:purine nucleotide binding
SPF_FS5_contig_600	[INTERPRO, BLASTED, MAPPED, GO-SLIM]	serine hydroxymethyltransferase, mitochondrial	2090	15	0	84.37	7	F:GO:0004372; C:GO:0005739; F:GO:0008168; P:GO:0019264; F:GO:0030170; P:GO:0032259; P:GO:0035999	F:glycine hydroxymethyltransferase activity; C:mitochondrion; F:methyltransferase activity; P:glycine biosynthetic process from serine; F:pyridoxal phosphate binding; P:methylation; P:tetrahydrofolate interconversion	EC:2.1.2.1	Glycine hydroxymethyltransferase	IPR039429 (PFAM); IPR001085 (PIRSF); IPR015421 (G3DSA:3.40.640.GENE3D); IPR015422 (G3DSA:3.90.1150.GENE3D); IPR001085 (PANTHER); PTHR11680:SF17 (PANTHER); IPR001085 (HAMAP); IPR001085 (CDD); IPR015424 (SUPERFAMILY)	F:GO:0003824; F:GO:0004372; P:GO:0019264; F:GO:0030170; P:GO:0035999	F:catalytic activity; F:glycine hydroxymethyltransferase activity; P:glycine biosynthetic process from serine; F:pyridoxal phosphate binding; P:tetrahydrofolate interconversion
SPF_FS5_contig_601	[INTERPRO, BLASTED, MAPPED, GO-SLIM]	isocitrate dehydrogenase	1623	15	0	87.38	5	F:GO:0000287; F:GO:0004450; P:GO:0006099; P:GO:0006102; F:GO:0051287	F:magnesium ion binding; F:isocitrate dehydrogenase (NADP+) activity; P:tricarboxylic acid cycle; P:isocitrate metabolic process; F:NAD binding	EC:1.1.1.42	Isocitrate dehydrogenase (NADP(+))	IPR024084 (SMART); IPR024084 (PFAM); IPR004790 (TIGRFAM); IPR004790 (PIRSF); G3DSA:3.40.718.10 (GENE3D); IPR004790 (PANTHER); PTHR11822:SF11 (PANTHER); SSF53659 (SUPERFAMILY)	F:GO:0004450; P:GO:0006102; F:GO:0016616; P:GO:0055114	F:isocitrate dehydrogenase (NADP+) activity; P:isocitrate metabolic process; F:oxidoreductase activity, acting on the CH-OH group of donors, NAD or NADP as acceptor; P:oxidation-reduction process
SPF_FS5_contig_602	[BLASTED, MAPPED, ANNOTATED]	vascular endothelial growth factor A-like isoform X2	1215	15	1.09151e-20	49.75	1	C:GO:0016020	C:membrane
SPF_FS5_contig_603	[INTERPRO, BLASTED, MAPPED, GO-SLIM]	Serine/threonine-protein kinase PAK 3	3290	15	3.33867e-143	80.88	4	F:GO:0004674; F:GO:0005524; P:GO:0006468; P:GO:0042981	F:protein serine/threonine kinase activity; F:ATP binding; P:protein phosphorylation; P:regulation of apoptotic process	EC:2.7.11	Transferring phosphorus-containing groups	IPR000719 (SMART); IPR000095 (SMART); IPR000719 (PFAM); G3DSA:1.10.510.10 (GENE3D); IPR000095 (PFAM); G3DSA:3.30.200.20 (GENE3D); IPR036936 (G3DSA:3.90.810.GENE3D); mobidb-lite (MOBIDB_LITE); mobidb-lite (MOBIDB_LITE); mobidb-lite (MOBIDB_LITE); mobidb-lite (MOBIDB_LITE); mobidb-lite (MOBIDB_LITE); PTHR24361:SF360 (PANTHER); PTHR24361 (PANTHER); IPR000095 (PROSITE_PROFILES); IPR000719 (PROSITE_PR…	F:GO:0004672; F:GO:0004674; F:GO:0005524; P:GO:0006468	F:protein kinase activity; F:protein serine/threonine kinase activity; F:ATP binding; P:protein phosphorylation
SPF_FS5_contig_604	[INTERPRO, BLASTED, MAPPED, GO-SLIM]	40S ribosomal protein S15Aa	404	15	5.60338e-77	93.12	3	F:GO:0003735; C:GO:0005840; P:GO:0006412	F:structural constituent of ribosome; C:ribosome; P:translation			IPR000630 (PFAM); G3DSA:3.30.1370.30 (GENE3D); G3DSA:3.30.1490.10 (GENE3D); IPR000630 (PANTHER); PTHR11758:SF16 (PANTHER); IPR035987 (SUPERFAMILY)	F:GO:0003735; C:GO:0005840; P:GO:0006412	F:structural constituent of ribosome; C:ribosome; P:translation
SPF_FS5_contig_605	[INTERPRO, BLASTED, MAPPED, GO-SLIM]	beta-1,3-glucan-binding protein-like isoform X1	2118	15	3.30314e-148	71.81	6	F:GO:0001530; F:GO:0001872; F:GO:0004553; P:GO:0005975; C:GO:0009986; F:GO:0038187	F:lipopolysaccharide binding; F:(1->3)-beta-D-glucan binding; F:hydrolase activity, hydrolyzing O-glycosyl compounds; P:carbohydrate metabolic process; C:cell surface; F:pattern recognition receptor activity			IPR031756 (PFAM); IPR000757 (PFAM); G3DSA:2.60.40.2140 (GENE3D); G3DSA:2.60.120.200 (GENE3D); mobidb-lite (MOBIDB_LITE); PTHR10963 (PANTHER); PTHR10963:SF55 (PANTHER); IPR000757 (PROSITE_PROFILES); cd08024 (CDD); IPR013320 (SUPERFAMILY)	F:GO:0004553; P:GO:0005975; F:GO:0030246	F:hydrolase activity, hydrolyzing O-glycosyl compounds; P:carbohydrate metabolic process; F:carbohydrate binding
SPF_FS5_contig_606	[INTERPRO, BLASTED, MAPPED, GO-SLIM]	dynein heavy chain 1, axonemal-like isoform X6	12903	15	0	85.2	5	P:GO:0003341; F:GO:0003777; F:GO:0005524; C:GO:0005858; F:GO:0016887	P:cilium movement; F:microtubule motor activity; F:ATP binding; C:axonemal dynein complex; F:ATPase activity	EC:3.6.1.3; EC:3.6.1.15	Adenosinetriphosphatase; Nucleoside-triphosphate phosphatase	IPR013602 (PFAM); IPR035706 (PFAM); IPR041589 (PFAM); PF12775 (PFAM); G3DSA:3.40.50.300 (GENE3D); IPR004273 (PFAM); G3DSA:1.20.920.20 (GENE3D); IPR035699 (PFAM); G3DSA:1.10.8.720 (GENE3D); IPR024743 (PFAM); IPR024317 (PFAM); G3DSA:3.20.180.20 (GENE3D); G3DSA:3.40.50.300 (GENE3D); IPR041466 (PFAM); IPR041228 (PFAM); G3DSA:1.10.8.710 (GENE3D); IPR041658 (PFAM); G3DSA:1.20.58.1120 (GENE3D); G3DSA:3.…	P:GO:0003341; F:GO:0003777; F:GO:0005524; C:GO:0005858; P:GO:0007018; F:GO:0016887; C:GO:0030286	P:cilium movement; F:microtubule motor activity; F:ATP binding; C:axonemal dynein complex; P:microtubule-based movement; F:ATPase activity; C:dynein complex
SPF_FS5_contig_609	[INTERPRO, BLASTED, MAPPED, GO-SLIM]	ATP-binding cassette sub-family A member 1 isoform X1	7608	15	0	59.76	4	F:GO:0005524; C:GO:0016021; F:GO:0042626; P:GO:0055085	F:ATP binding; C:integral component of membrane; F:ATPase-coupled transmembrane transporter activity; P:transmembrane transport	EC:3.6.1.3; EC:3.6.1.15	Adenosinetriphosphatase; Nucleoside-triphosphate phosphatase	IPR003593 (SMART); G3DSA:3.40.50.300 (GENE3D); IPR003439 (PFAM); IPR003439 (PFAM); PF12698 (PFAM); mobidb-lite (MOBIDB_LITE); mobidb-lite (MOBIDB_LITE); mobidb-lite (MOBIDB_LITE); mobidb-lite (MOBIDB_LITE); IPR026082 (PANTHER); PTHR19229:SF34 (PANTHER); IPR026082 (PANTHER); IPR026082 (PANTHER); PTHR19229:SF34 (PANTHER); IPR003439 (PROSITE_PROFILES); IPR003439 (PROSITE_PROFILES); cd03263 (CDD); cd…	F:GO:0005524; C:GO:0016021; F:GO:0016887; F:GO:0042626; P:GO:0055085	F:ATP binding; C:integral component of membrane; F:ATPase activity; F:ATPase-coupled transmembrane transporter activity; P:transmembrane transport
SPF_FS5_contig_610	[INTERPRO, BLASTED, MAPPED, GO-SLIM]	60S ribosomal protein L36	338	15	1.0841e-38	79.47	3	P:GO:0002181; F:GO:0003735; C:GO:0022625	P:cytoplasmic translation; F:structural constituent of ribosome; C:cytosolic large ribosomal subunit			IPR000509 (PFAM); IPR038097 (G3DSA:1.10.10.GENE3D); IPR000509 (PANTHER); PTHR10114:SF5 (PANTHER)	F:GO:0003735; C:GO:0005622; C:GO:0005840; P:GO:0006412	F:structural constituent of ribosome; C:intracellular; C:ribosome; P:translation
SPF_FS5_contig_613	[INTERPRO, BLASTED, MAPPED, GO-SLIM]	probable pectate lyase 4	1134	15	9.66202e-44	57.96	1	F:GO:0016829	F:lyase activity			IPR002022 (SMART); IPR012334 (G3DSA:2.160.20.GENE3D); IPR002022 (PFAM); PTHR31683 (PANTHER); IPR011050 (SUPERFAMILY)	no GO terms	no GO terms
SPF_FS5_contig_614	[INTERPRO, BLASTED, MAPPED, GO-SLIM]	calcyphosin-like protein	1346	15	7.31582e-94	78.57	1	F:GO:0043167	F:ion binding			IPR002048 (SMART); IPR002048 (PFAM); G3DSA:1.10.238.10 (GENE3D); G3DSA:1.10.238.10 (GENE3D); PTHR44041 (PANTHER); IPR029633 (PTHR44041:PANTHER); IPR002048 (PROSITE_PROFILES); IPR002048 (PROSITE_PROFILES); IPR002048 (PROSITE_PROFILES); IPR002048 (PROSITE_PROFILES); IPR002048 (CDD); IPR011992 (SUPERFAMILY)	F:GO:0005509	F:calcium ion binding
SPF_FS5_contig_615	[INTERPRO, BLASTED, MAPPED, GO-SLIM]	probable global transcription activator SNF2L2	5158	15	0	75.25	6	F:GO:0005524; P:GO:0006355; C:GO:0016514; F:GO:0016887; F:GO:0042393; P:GO:0043044	F:ATP binding; P:regulation of transcription, DNA-templated; C:SWI/SNF complex; F:ATPase activity; F:histone binding; P:ATP-dependent chromatin remodeling			IPR001487 (PRINTS); IPR006576 (SMART); IPR014012 (SMART); IPR014001 (SMART); IPR014978 (SMART); IPR029295 (SMART); IPR001487 (SMART); IPR001650 (SMART); IPR014012 (PFAM); G3DSA:3.40.50.300 (GENE3D); IPR038718 (G3DSA:3.40.50.GENE3D); IPR000330 (PFAM); IPR014978 (PFAM); IPR001650 (PFAM); G3DSA:1.20.5.170 (GENE3D); IPR036427 (G3DSA:1.20.920.GENE3D); IPR037259 (G3DSA:2.20.28.GENE3D); IPR006576 (PFAM)…	F:GO:0005515; F:GO:0005524; C:GO:0005634; P:GO:0006355; C:GO:0016514; F:GO:0016817; F:GO:0016887; F:GO:0042393; P:GO:0043044	F:protein binding; F:ATP binding; C:nucleus; P:regulation of transcription, DNA-templated; C:SWI/SNF complex; F:hydrolase activity, acting on acid anhydrides; F:ATPase activity; F:histone binding; P:ATP-dependent chromatin remodeling
SPF_FS5_contig_616	[INTERPRO, BLASTED, MAPPED, GO-SLIM]	elongation factor 1-gamma	1776	15	2.01955e-167	76.11	5	F:GO:0003746; F:GO:0005515; C:GO:0005634; C:GO:0005737; P:GO:0006414	F:translation elongation factor activity; F:protein binding; C:nucleus; C:cytoplasm; P:translational elongation			IPR001662 (SMART); G3DSA:1.20.1050.10 (GENE3D); IPR004045 (PFAM); IPR036433 (G3DSA:3.30.70.GENE3D); IPR004046 (PFAM); G3DSA:3.40.30.10 (GENE3D); IPR001662 (PFAM); IPR040079 (mobidb-MOBIDB_LITE); mobidb-lite (MOBIDB_LITE); PTHR43986 (PANTHER); IPR001662 (PROSITE_PROFILES); IPR004045 (PROSITE_PROFILES); IPR010987 (PROSITE_PROFILES); cd03181 (CDD); cd03044 (CDD); IPR036433 (SUPERFAMILY); IPR036282 (…	F:GO:0003746; F:GO:0005515; P:GO:0006414	F:translation elongation factor activity; F:protein binding; P:translational elongation
SPF_FS5_contig_617	[INTERPRO, BLASTED, MAPPED, GO-SLIM]	exportin-1-like	3936	15	0	88.04	7	P:GO:0000055; P:GO:0000056; F:GO:0005049; C:GO:0005634; C:GO:0005737; F:GO:0008536; P:GO:0046825	P:ribosomal large subunit export from nucleus; P:ribosomal small subunit export from nucleus; F:nuclear export signal receptor activity; C:nucleus; C:cytoplasm; F:Ran GTPase binding; P:regulation of protein export from nucleus			IPR014877 (SMART); IPR001494 (SMART); IPR011989 (G3DSA:1.25.10.GENE3D); IPR041123 (PFAM); IPR001494 (PFAM); IPR041235 (PFAM); IPR013598 (PFAM); IPR014877 (PFAM); IPR040485 (PFAM); PTHR11223 (PANTHER); PTHR11223:SF4 (PANTHER); IPR001494 (PROSITE_PROFILES); IPR016024 (SUPERFAMILY)	F:GO:0005049; P:GO:0006886; F:GO:0008536	F:nuclear export signal receptor activity; P:intracellular protein transport; F:Ran GTPase binding
SPF_FS5_contig_618	[INTERPRO, BLASTED, MAPPED, GO-SLIM]	60S ribosomal protein L10a	747	15	2.99542e-111	89.99	5	P:GO:0000470; F:GO:0003723; F:GO:0003735; P:GO:0006412; C:GO:0022625	P:maturation of LSU-rRNA; F:RNA binding; F:structural constituent of ribosome; P:translation; C:cytosolic large ribosomal subunit			IPR028364 (PFAM); IPR002143 (PIRSF); IPR016095 (G3DSA:3.40.50.GENE3D); G3DSA:3.30.190.20 (GENE3D); PTHR23105:SF101 (PANTHER); PTHR23105 (PANTHER); IPR028364 (CDD); IPR023674 (SUPERFAMILY)	F:GO:0003723; F:GO:0003735; P:GO:0006412; C:GO:0015934	F:RNA binding; F:structural constituent of ribosome; P:translation; C:large ribosomal subunit
SPF_FS5_contig_619	[INTERPRO, BLASTED, MAPPED, GO-SLIM]	receptor-type guanylate cyclase gcy-4-like isoform X1	5034	15	0	55.16	3	F:GO:0004713; F:GO:0005524; P:GO:0006468	F:protein tyrosine kinase activity; F:ATP binding; P:protein phosphorylation			IPR001245 (PRINTS); IPR020635 (SMART); IPR000719 (SMART); G3DSA:3.30.200.20 (GENE3D); IPR001828 (PFAM); G3DSA:1.10.510.10 (GENE3D); G3DSA:3.40.50.2300 (GENE3D); IPR001245 (PFAM); G3DSA:3.40.50.2300 (GENE3D); mobidb-lite (MOBIDB_LITE); mobidb-lite (MOBIDB_LITE); mobidb-lite (MOBIDB_LITE); mobidb-lite (MOBIDB_LITE); mobidb-lite (MOBIDB_LITE); mobidb-lite (MOBIDB_LITE); PTHR24416:SF489 (PANTHER); PT…	F:GO:0004672; F:GO:0004713; F:GO:0005524; P:GO:0006468	F:protein kinase activity; F:protein tyrosine kinase activity; F:ATP binding; P:protein phosphorylation
SPF_FS5_contig_621	[INTERPRO, BLASTED, MAPPED, GO-SLIM]	protein SET-like	1294	15	3.62123e-115	84.6	3	C:GO:0005634; P:GO:0051276; P:GO:0065003	C:nucleus; P:chromosome organization; P:protein-containing complex assembly			IPR002164 (PFAM); G3DSA:3.30.1120.90 (GENE3D); mobidb-lite (MOBIDB_LITE); mobidb-lite (MOBIDB_LITE); PTHR11875:SF67 (PANTHER); IPR002164 (PANTHER); IPR037231 (SUPERFAMILY)	C:GO:0005634; P:GO:0006334	C:nucleus; P:nucleosome assembly
SPF_FS5_contig_624	[INTERPRO, BLASTED, MAPPED, GO-SLIM]	serine/arginine-rich splicing factor 6-like isoform X1	1352	15	5.08933e-66	77.29	1	F:GO:0003723	F:RNA binding			IPR000504 (SMART); IPR012677 (G3DSA:3.30.70.GENE3D); IPR000504 (PFAM); IPR012677 (G3DSA:3.30.70.GENE3D); mobidb-lite (MOBIDB_LITE); mobidb-lite (MOBIDB_LITE); mobidb-lite (MOBIDB_LITE); mobidb-lite (MOBIDB_LITE); mobidb-lite (MOBIDB_LITE); mobidb-lite (MOBIDB_LITE); mobidb-lite (MOBIDB_LITE); PTHR45109 (PANTHER); IPR000504 (PROSITE_PROFILES); IPR000504 (PROSITE_PROFILES); IPR035585 (CDD); cd12600…	F:GO:0003676	F:nucleic acid binding
SPF_FS5_contig_627	[INTERPRO, BLASTED, MAPPED, GO-SLIM]	proline-rich AKT1 substrate 1-like	1677	15	5.153e-10	62.15	4	C:GO:0005737; P:GO:0006464; P:GO:0007165; C:GO:0032991	C:cytoplasm; P:cellular protein modification process; P:signal transduction; C:protein-containing complex			IPR026682 (PFAM); mobidb-lite (MOBIDB_LITE); mobidb-lite (MOBIDB_LITE); mobidb-lite (MOBIDB_LITE); mobidb-lite (MOBIDB_LITE); mobidb-lite (MOBIDB_LITE); mobidb-lite (MOBIDB_LITE); IPR026682 (PANTHER)	P:GO:0032007; P:GO:0048011	P:negative regulation of TOR signaling; P:neurotrophin TRK receptor signaling pathway
SPF_FS5_contig_630	[INTERPRO, BLASTED, MAPPED, GO-SLIM]	interleukin-1 receptor-associated kinase 4 isoform X1	2434	15	1.63368e-72	55.78	7	P:GO:0001816; P:GO:0002376; F:GO:0004672; F:GO:0005149; F:GO:0005524; P:GO:0006468; P:GO:0019221	P:cytokine production; P:immune system process; F:protein kinase activity; F:interleukin-1 receptor binding; F:ATP binding; P:protein phosphorylation; P:cytokine-mediated signaling pathway			IPR000719 (SMART); G3DSA:1.10.510.10 (GENE3D); G3DSA:1.10.533.10 (GENE3D); IPR000719 (PFAM); IPR000488 (PFAM); mobidb-lite (MOBIDB_LITE); PTHR24419:SF22 (PANTHER); PTHR24419 (PANTHER); IPR000719 (PROSITE_PROFILES); IPR011009 (SUPERFAMILY); IPR011029 (SUPERFAMILY)	F:GO:0004672; F:GO:0005515; F:GO:0005524; P:GO:0006468; P:GO:0007165	F:protein kinase activity; F:protein binding; F:ATP binding; P:protein phosphorylation; P:signal transduction
SPF_FS5_contig_631	[INTERPRO, BLASTED, MAPPED, GO-SLIM]	anoctamin-4-like isoform X2	3368	15	0	67	2	F:GO:0003674; C:GO:0005575	F:molecular_function; C:cellular_component			IPR032394 (PFAM); IPR007632 (PFAM); PTHR12308:SF75 (PANTHER); IPR007632 (PANTHER)	F:GO:0046983	F:protein dimerization activity
SPF_FS5_contig_632	[INTERPRO, BLASTED, MAPPED, GO-SLIM]	V-type proton ATPase 116 kDa subunit a-like isoform X2	3275	15	0	75.29	3	C:GO:0000220; F:GO:0015078; P:GO:1902600	C:vacuolar proton-transporting V-type ATPase, V0 domain; F:proton transmembrane transporter activity; P:proton transmembrane transport			IPR026028 (PIRSF); IPR002490 (PFAM); PTHR11629:SF68 (PANTHER); IPR002490 (PANTHER)	C:GO:0000220; F:GO:0015078; C:GO:0033179; P:GO:1902600	C:vacuolar proton-transporting V-type ATPase, V0 domain; F:proton transmembrane transporter activity; C:proton-transporting V-type ATPase, V0 domain; P:proton transmembrane transport
SPF_FS5_contig_633	[INTERPRO, BLASTED, MAPPED, GO-SLIM]	beta-hexosaminidase subunit alpha-like isoform X2	2068	15	0	70.21	2	F:GO:0004563; P:GO:0005975	F:beta-N-acetylhexosaminidase activity; P:carbohydrate metabolic process			IPR025705 (PRINTS); IPR029018 (G3DSA:3.30.379.GENE3D); G3DSA:3.20.20.80 (GENE3D); IPR015883 (PFAM); IPR025705 (PIRSF); IPR029019 (PFAM); PTHR22600:SF38 (PANTHER); PTHR22600 (PANTHER); cd06562 (CDD); IPR029018 (SUPERFAMILY); IPR017853 (SUPERFAMILY)	F:GO:0004553; F:GO:0004563; P:GO:0005975	F:hydrolase activity, hydrolyzing O-glycosyl compounds; F:beta-N-acetylhexosaminidase activity; P:carbohydrate metabolic process
SPF_FS5_contig_634	[INTERPRO, BLASTED, MAPPED, GO-SLIM]	beta-adrenergic receptor kinase 2-like isoform X2	3201	15	0	87.01	4	F:GO:0004703; F:GO:0005524; P:GO:0006468; P:GO:0007165	F:G protein-coupled receptor kinase activity; F:ATP binding; P:protein phosphorylation; P:signal transduction	EC:2.7.11; EC:2.7.11.16	Transferring phosphorus-containing groups; [G-protein-coupled receptor] kinase	IPR000239 (PRINTS); IPR000719 (SMART); IPR000961 (SMART); IPR000719 (PFAM); G3DSA:3.30.200.20 (GENE3D); G3DSA:1.20.58.1850 (GENE3D); G3DSA:1.10.510.10 (GENE3D); IPR011993 (G3DSA:2.30.29.GENE3D); PTHR24355:SF17 (PANTHER); PTHR24355 (PANTHER); IPR000961 (PROSITE_PROFILES); IPR016137 (PROSITE_PROFILES); IPR001849 (PROSITE_PROFILES); IPR000719 (PROSITE_PROFILES); SSF50729 (SUPERFAMILY); IPR011009 (SU…	F:GO:0004672; F:GO:0004674; F:GO:0004703; F:GO:0005524; P:GO:0006468; P:GO:0007165	F:protein kinase activity; F:protein serine/threonine kinase activity; F:G protein-coupled receptor kinase activity; F:ATP binding; P:protein phosphorylation; P:signal transduction
SPF_FS5_contig_636	[INTERPRO, BLASTED, MAPPED, GO-SLIM]	myoferlin-like isoform X7	6769	15	0	69.88	1	C:GO:0005575	C:cellular_component			IPR012968 (SMART); IPR006614 (SMART); IPR006614 (SMART); IPR000008 (SMART); IPR012561 (SMART); IPR000008 (PFAM); IPR012561 (PFAM); IPR032362 (PFAM); IPR012560 (PFAM); IPR012968 (PFAM); IPR035892 (G3DSA:2.60.40.GENE3D); IPR035892 (G3DSA:2.60.40.GENE3D); IPR035892 (G3DSA:2.60.40.GENE3D); IPR035892 (G3DSA:2.60.40.GENE3D); IPR035892 (G3DSA:2.60.40.GENE3D); IPR035892 (G3DSA:2.60.40.GENE3D); mobidb-lit…	C:GO:0016021	C:integral component of membrane
SPF_FS5_contig_637	[INTERPRO, BLASTED, MAPPED, GO-SLIM]	transmembrane channel-like protein 5	4566	15	1.66275e-102	51.38	1	C:GO:0005887	C:integral component of plasma membrane			IPR012496 (PFAM); mobidb-lite (MOBIDB_LITE); mobidb-lite (MOBIDB_LITE); mobidb-lite (MOBIDB_LITE); mobidb-lite (MOBIDB_LITE); mobidb-lite (MOBIDB_LITE); IPR038900 (PANTHER); PTHR23302:SF43 (PANTHER)	C:GO:0005887; C:GO:0016021	C:integral component of plasma membrane; C:integral component of membrane
SPF_FS5_contig_640	[INTERPRO, BLASTED, MAPPED, GO-SLIM]	ADP,ATP carrier protein 3, mitochondrial-like	1729	15	1.87041e-166	89.13	6	F:GO:0005471; C:GO:0005743; P:GO:0015866; P:GO:0015867; C:GO:0016021; P:GO:0055085	F:ATP:ADP antiporter activity; C:mitochondrial inner membrane; P:ADP transport; P:ATP transport; C:integral component of membrane; P:transmembrane transport			IPR002113 (PRINTS); IPR002067 (PRINTS); IPR018108 (PFAM); IPR023395 (G3DSA:1.50.40.GENE3D); IPR040062 (PANTHER); PTHR24089:SF31 (PANTHER); IPR018108 (PROSITE_PROFILES); IPR018108 (PROSITE_PROFILES); IPR018108 (PROSITE_PROFILES); IPR023395 (SUPERFAMILY)	C:GO:0005743; F:GO:0022857; P:GO:0055085	C:mitochondrial inner membrane; F:transmembrane transporter activity; P:transmembrane transport
SPF_FS5_contig_643	[INTERPRO, BLASTED, MAPPED, GO-SLIM]	protein transport protein Sec23A isoform X2	3026	15	0	81.45	9	C:GO:0000139; F:GO:0005096; C:GO:0005789; P:GO:0006886; F:GO:0008270; C:GO:0030127; P:GO:0043547; C:GO:0070971; P:GO:0090110	C:Golgi membrane; F:GTPase activator activity; C:endoplasmic reticulum membrane; P:intracellular protein transport; F:zinc ion binding; C:COPII vesicle coat; P:positive regulation of GTPase activity; C:endoplasmic reticulum exit site; P:COPII-coated vesicle cargo loading			IPR029006 (G3DSA:3.40.20.GENE3D); IPR007123 (PFAM); G3DSA:2.30.30.380 (GENE3D); IPR036465 (G3DSA:3.40.50.GENE3D); IPR006900 (PFAM); IPR006896 (PFAM); IPR012990 (PFAM); G3DSA:1.20.120.730 (GENE3D); G3DSA:2.60.40.1670 (GENE3D); IPR006895 (PFAM); PTHR11141:SF10 (PANTHER); IPR037364 (PANTHER); IPR037550 (CDD); IPR036174 (SUPERFAMILY); IPR036465 (SUPERFAMILY); IPR036180 (SUPERFAMILY); SSF81995 (SUPERF…	P:GO:0006886; P:GO:0006888; F:GO:0008270; C:GO:0030127; P:GO:0090114	P:intracellular protein transport; P:endoplasmic reticulum to Golgi vesicle-mediated transport; F:zinc ion binding; C:COPII vesicle coat; P:COPII-coated vesicle budding
SPF_FS5_contig_644	[INTERPRO, BLASTED, MAPPED, GO-SLIM]	Lysosome-associated membrane glycoprotein 1	1752	15	3.9445e-18	48.52	1	C:GO:0005575	C:cellular_component			G3DSA:2.40.160.110 (GENE3D); IPR002000 (PANTHER); IPR002000 (PROSITE_PROFILES); cd12087 (CDD)	C:GO:0016020	C:membrane
SPF_FS5_contig_648	[INTERPRO, BLASTED, MAPPED, GO-SLIM]	serine/threonine-protein phosphatase 4 regulatory subunit 2-A-like	2125	15	5.62171e-51	69.95	5	C:GO:0005634; C:GO:0005737; P:GO:0006464; F:GO:0030234; C:GO:0032991	C:nucleus; C:cytoplasm; P:cellular protein modification process; F:enzyme regulator activity; C:protein-containing complex			IPR015267 (PFAM); mobidb-lite (MOBIDB_LITE); mobidb-lite (MOBIDB_LITE); mobidb-lite (MOBIDB_LITE); mobidb-lite (MOBIDB_LITE); mobidb-lite (MOBIDB_LITE); IPR015267 (PANTHER)	F:GO:0019888; C:GO:0030289	F:protein phosphatase regulator activity; C:protein phosphatase 4 complex
SPF_FS5_contig_649	[INTERPRO, BLASTED, MAPPED, GO-SLIM]	probable pyruvate dehydrogenase E1 component subunit alpha, mitochondrial	1148	15	0	87.38	4	F:GO:0004739; P:GO:0006086; C:GO:0043231; P:GO:0055114	F:pyruvate dehydrogenase (acetyl-transferring) activity; P:acetyl-CoA biosynthetic process from pyruvate; C:intracellular membrane-bounded organelle; P:oxidation-reduction process	EC:1.2.4.1	Pyruvate dehydrogenase (acetyl-transferring)	IPR017597 (TIGRFAM); IPR001017 (PFAM); G3DSA:3.40.50.970 (GENE3D); PTHR11516:SF40 (PANTHER); PTHR11516 (PANTHER); cd02000 (CDD); IPR029061 (SUPERFAMILY)	F:GO:0004739; P:GO:0006086; F:GO:0016624; C:GO:0043231	F:pyruvate dehydrogenase (acetyl-transferring) activity; P:acetyl-CoA biosynthetic process from pyruvate; F:oxidoreductase activity, acting on the aldehyde or oxo group of donors, disulfide as acceptor; C:intracellular membrane-bounded organelle
SPF_FS5_contig_651	[INTERPRO, BLASTED, MAPPED, GO-SLIM]	probable pyruvate dehydrogenase E1 component subunit alpha, mitochondrial	917	15	1.2806e-125	84.13	4	F:GO:0004739; C:GO:0005739; P:GO:0006086; P:GO:0055114	F:pyruvate dehydrogenase (acetyl-transferring) activity; C:mitochondrion; P:acetyl-CoA biosynthetic process from pyruvate; P:oxidation-reduction process	EC:1.2.4.1	Pyruvate dehydrogenase (acetyl-transferring)	IPR001017 (PFAM); G3DSA:3.40.50.970 (GENE3D); PTHR11516 (PANTHER); PTHR11516:SF40 (PANTHER); cd02000 (CDD); IPR029061 (SUPERFAMILY)	F:GO:0016624	F:oxidoreductase activity, acting on the aldehyde or oxo group of donors, disulfide as acceptor
SPF_FS5_contig_652	[INTERPRO, BLASTED, MAPPED, GO-SLIM]	60S ribosomal protein L5	1097	15	1.84183e-151	84.14	5	P:GO:0000027; F:GO:0003735; P:GO:0006412; F:GO:0008097; C:GO:0022625	P:ribosomal large subunit assembly; F:structural constituent of ribosome; P:translation; F:5S rRNA binding; C:cytosolic large ribosomal subunit			IPR005485 (PRINTS); G3DSA:3.30.420.550 (GENE3D); IPR025607 (PFAM); IPR005485 (PFAM); mobidb-lite (MOBIDB_LITE); mobidb-lite (MOBIDB_LITE); IPR005485 (PANTHER); PTHR23410:SF12 (PANTHER); IPR005485 (HAMAP); cd00432 (CDD); SSF53137 (SUPERFAMILY)	F:GO:0003735; C:GO:0005622; C:GO:0005840; P:GO:0006412; F:GO:0008097	F:structural constituent of ribosome; C:intracellular; C:ribosome; P:translation; F:5S rRNA binding
SPF_FS5_contig_654	[INTERPRO, BLASTED, MAPPED, GO-SLIM]	ornithine decarboxylase-like	1580	15	3.8259e-117	63.62	3	F:GO:0003674; P:GO:0009058; P:GO:0034641	F:molecular_function; P:biosynthetic process; P:cellular nitrogen compound metabolic process			IPR002433 (PRINTS); IPR000183 (PRINTS); IPR022643 (PFAM); IPR022644 (PFAM); IPR029066 (G3DSA:3.20.20.GENE3D); IPR009006 (G3DSA:2.40.37.GENE3D); IPR002433 (PANTHER); cd00622 (CDD); IPR009006 (SUPERFAMILY); IPR029066 (SUPERFAMILY)	F:GO:0003824; P:GO:0006596	F:catalytic activity; P:polyamine biosynthetic process
SPF_FS5_contig_656	[INTERPRO, BLASTED, MAPPED, GO-SLIM]	coatomer subunit beta'-like isoform X1	3598	15	0	87.35	7	C:GO:0000139; F:GO:0005198; F:GO:0005515; P:GO:0006886; P:GO:0016192; C:GO:0030117; C:GO:0030663	C:Golgi membrane; F:structural molecule activity; F:protein binding; P:intracellular protein transport; P:vesicle-mediated transport; C:membrane coat; C:COPI-coated vesicle membrane			IPR020472 (PRINTS); IPR001680 (SMART); IPR001680 (PFAM); IPR015943 (G3DSA:2.130.10.GENE3D); IPR016453 (PIRSF); G3DSA:1.25.40.470 (GENE3D); IPR006692 (PFAM); mobidb-lite (MOBIDB_LITE); mobidb-lite (MOBIDB_LITE); PTHR19876 (PANTHER); PTHR19876:SF2 (PANTHER); IPR017986 (PROSITE_PROFILES); IPR001680 (PROSITE_PROFILES); IPR001680 (PROSITE_PROFILES); IPR001680 (PROSITE_PROFILES); IPR001680 (PROSITE_PRO…	F:GO:0005198; F:GO:0005515; P:GO:0006886; P:GO:0016192; C:GO:0030117	F:structural molecule activity; F:protein binding; P:intracellular protein transport; P:vesicle-mediated transport; C:membrane coat
SPF_FS5_contig_657	[INTERPRO, BLASTED, MAPPED, GO-SLIM]	5-methylcytosine rRNA methyltransferase NSUN4	1535	15	2.20069e-55	58.37	2	F:GO:0003723; F:GO:0008168	F:RNA binding; F:methyltransferase activity			IPR023267 (PRINTS); G3DSA:3.40.50.150 (GENE3D); IPR001678 (PFAM); G3DSA:3.30.70.3470 (GENE3D); mobidb-lite (MOBIDB_LITE); mobidb-lite (MOBIDB_LITE); PTHR22808 (PANTHER); PTHR22808:SF3 (PANTHER); IPR001678 (PROSITE_PROFILES); IPR029063 (SUPERFAMILY)	F:GO:0008168	F:methyltransferase activity
SPF_FS5_contig_658	[BLASTED, MAPPED, ANNOTATED]	bis(5'-adenosyl)-triphosphatase ENPP4 isoform X1	2397	15	1.1445e-66	50.93	2	F:GO:0003824; C:GO:0016020	F:catalytic activity; C:membrane
SPF_FS5_contig_659	[INTERPRO, BLASTED, MAPPED, GO-SLIM]	Serine/threonine-protein phosphatase 2A 65 kDa regulatory subunit A alpha isoform	4429	15	0	88.52	4	F:GO:0003676; F:GO:0005515; F:GO:0008408; P:GO:0090305	F:nucleic acid binding; F:protein binding; F:3'-5' exonuclease activity; P:nucleic acid phosphodiester bond hydrolysis			IPR011989 (G3DSA:1.25.10.GENE3D); PF13646 (PFAM); IPR000357 (PFAM); PTHR10648:SF9 (PANTHER); PTHR10648 (PANTHER); IPR021133 (PROSITE_PROFILES); IPR021133 (PROSITE_PROFILES); IPR021133 (PROSITE_PROFILES); IPR021133 (PROSITE_PROFILES); IPR021133 (PROSITE_PROFILES); IPR021133 (PROSITE_PROFILES); IPR021133 (PROSITE_PROFILES); IPR021133 (PROSITE_PROFILES); IPR021133 (PROSITE_PROFILES); IPR021133 (PROS…	F:GO:0005515	F:protein binding
SPF_FS5_contig_660	[INTERPRO, BLASTED, MAPPED, GO-SLIM]	E3 ubiquitin-protein ligase rnf213-alpha-like isoform X1	9310	15	0	52.93	2	F:GO:0004842; F:GO:0016887	F:ubiquitin-protein transferase activity; F:ATPase activity			IPR003593 (SMART); IPR013083 (G3DSA:3.30.40.GENE3D); G3DSA:3.40.50.300 (GENE3D); G3DSA:3.40.50.300 (GENE3D); mobidb-lite (MOBIDB_LITE); mobidb-lite (MOBIDB_LITE); IPR031248 (PANTHER); SSF57850 (SUPERFAMILY); IPR027417 (SUPERFAMILY); IPR027417 (SUPERFAMILY)	F:GO:0004842; F:GO:0016887	F:ubiquitin-protein transferase activity; F:ATPase activity
SPF_FS5_contig_661	[INTERPRO, BLASTED, MAPPED, GO-SLIM]	synapse differentiation-inducing gene protein 1-like	1211	15	5.62256e-10	62.44	1	C:GO:0005575	C:cellular_component			IPR007593 (PFAM); mobidb-lite (MOBIDB_LITE); PTHR14948 (PANTHER); PTHR14948:SF22 (PANTHER)	C:GO:0016021	C:integral component of membrane
SPF_FS5_contig_664	[INTERPRO, BLASTED, MAPPED, GO-SLIM]	kinesin-like protein KIF28P	4038	15	0	75.32	4	F:GO:0003777; F:GO:0005524; P:GO:0007018; F:GO:0008017	F:microtubule motor activity; F:ATP binding; P:microtubule-based movement; F:microtubule binding	EC:3.6.1.15	Nucleoside-triphosphate phosphatase	IPR001752 (PRINTS); IPR001752 (SMART); IPR001752 (PFAM); IPR000253 (PFAM); IPR036961 (G3DSA:3.40.850.GENE3D); IPR022140 (PFAM); G3DSA:2.60.200.20 (GENE3D); mobidb-lite (MOBIDB_LITE); mobidb-lite (MOBIDB_LITE); mobidb-lite (MOBIDB_LITE); mobidb-lite (MOBIDB_LITE); IPR027640 (PANTHER); PTHR24115:SF344 (PANTHER); IPR001752 (PROSITE_PROFILES); IPR000253 (CDD); SSF49562 (SUPERFAMILY); IPR008984 (SUPER…	F:GO:0003777; F:GO:0005515; F:GO:0005524; P:GO:0007018; F:GO:0008017	F:microtubule motor activity; F:protein binding; F:ATP binding; P:microtubule-based movement; F:microtubule binding
SPF_FS5_contig_665	[INTERPRO, BLASTED, MAPPED, GO-SLIM]	Transposon Tf2-6 polyprotein	2402	15	0	66.19	2	F:GO:0003676; F:GO:0008270	F:nucleic acid binding; F:zinc ion binding			IPR001878 (SMART); IPR000477 (PFAM); IPR021109 (G3DSA:2.40.70.GENE3D); G3DSA:3.10.10.10 (GENE3D); G3DSA:4.10.60.10 (GENE3D); PF13650 (PFAM); G3DSA:3.30.70.270 (GENE3D); mobidb-lite (MOBIDB_LITE); PTHR24559:SF222 (PANTHER); PTHR24559 (PANTHER); cd01647 (CDD); IPR021109 (SUPERFAMILY); SSF56672 (SUPERFAMILY); IPR036875 (SUPERFAMILY)	F:GO:0003676; F:GO:0008270	F:nucleic acid binding; F:zinc ion binding
SPF_FS5_contig_666	[INTERPRO, BLASTED, MAPPED, GO-SLIM]	elongation factor 2	2843	15	0	85.78	5	F:GO:0003924; C:GO:0005829; F:GO:0008135; C:GO:0032991; F:GO:0043167	F:GTPase activity; C:cytosol; F:translation factor activity, RNA binding; C:protein-containing complex; F:ion binding	EC:3.6.1.15	Nucleoside-triphosphate phosphatase	IPR000795 (PRINTS); IPR005517 (SMART); IPR000640 (SMART); IPR014721 (G3DSA:3.30.230.GENE3D); G3DSA:3.40.50.300 (GENE3D); IPR041095 (PFAM); G3DSA:2.40.30.10 (GENE3D); G3DSA:3.30.70.240 (GENE3D); G3DSA:3.90.1430.10 (GENE3D); IPR005517 (PFAM); IPR000795 (PFAM); IPR005225 (TIGRFAM); G3DSA:3.30.70.870 (GENE3D); IPR000640 (PFAM); IPR004161 (PFAM); PTHR42908 (PANTHER); PTHR42908:SF10 (PANTHER); IPR00079…	F:GO:0003924; F:GO:0005525	F:GTPase activity; F:GTP binding
SPF_FS5_contig_667	[INTERPRO, BLASTED, MAPPED, GO-SLIM]	V-type proton ATPase subunit S1-like	1976	15	9.1583e-37	43.02	4	C:GO:0033180; F:GO:0046933; F:GO:0046961; P:GO:1902600	C:proton-transporting V-type ATPase, V1 domain; F:proton-transporting ATP synthase activity, rotational mechanism; F:proton-transporting ATPase activity, rotational mechanism; P:proton transmembrane transport			IPR008388 (PFAM); IPR008388 (PANTHER)	C:GO:0033180; F:GO:0046933; F:GO:0046961; P:GO:1902600	C:proton-transporting V-type ATPase, V1 domain; F:proton-transporting ATP synthase activity, rotational mechanism; F:proton-transporting ATPase activity, rotational mechanism; P:proton transmembrane transport
SPF_FS5_contig_670	[INTERPRO, BLASTED, MAPPED, GO-SLIM]	lysosomal acid phosphatase	1563	15	6.3765e-103	60.38	1	C:GO:0005575	C:cellular_component			IPR029033 (G3DSA:3.40.50.GENE3D); IPR000560 (PFAM); PTHR11567 (PANTHER); PTHR11567:SF170 (PANTHER); IPR000560 (CDD); IPR029033 (SUPERFAMILY)	no GO terms	no GO terms
SPF_FS5_contig_671	[INTERPRO, BLASTED, MAPPED, GO-SLIM]	cell cycle control protein 50A	2072	15	8.34067e-133	69.73	1	C:GO:0005575	C:cellular_component			IPR005045 (PFAM); IPR005045 (PIRSF); PTHR10926:SF46 (PANTHER); IPR005045 (PANTHER)	C:GO:0016020	C:membrane
SPF_FS5_contig_672	[INTERPRO, BLASTED, MAPPED, GO-SLIM]	syntaxin-5-like	1400	15	1.18873e-124	75.66	9	C:GO:0000139; F:GO:0000149; F:GO:0005484; P:GO:0006886; P:GO:0006888; P:GO:0006906; C:GO:0016021; C:GO:0031201; P:GO:0048278	C:Golgi membrane; F:SNARE binding; F:SNAP receptor activity; P:intracellular protein transport; P:endoplasmic reticulum to Golgi vesicle-mediated transport; P:vesicle fusion; C:integral component of membrane; C:SNARE complex; P:vesicle docking			IPR000727 (SMART); IPR000727 (PFAM); IPR021538 (PFAM); G3DSA:1.20.5.110 (GENE3D); mobidb-lite (MOBIDB_LITE); mobidb-lite (MOBIDB_LITE); PTHR19957 (PANTHER); PTHR19957:SF3 (PANTHER); IPR000727 (PROSITE_PROFILES); cd15844 (CDD); IPR010989 (SUPERFAMILY)	C:GO:0016020; P:GO:0016192	C:membrane; P:vesicle-mediated transport
SPF_FS5_contig_675	[INTERPRO, BLASTED, MAPPED, GO-SLIM]	retinoid X receptor	2737	15	0	78.64	7	F:GO:0003700; F:GO:0003707; C:GO:0005634; P:GO:0006355; F:GO:0008270; P:GO:0043401; F:GO:0043565	F:DNA-binding transcription factor activity; F:steroid hormone receptor activity; C:nucleus; P:regulation of transcription, DNA-templated; F:zinc ion binding; P:steroid hormone mediated signaling pathway; F:sequence-specific DNA binding			IPR001628 (PRINTS); IPR001723 (PRINTS); IPR000003 (PRINTS); IPR001628 (SMART); IPR000536 (SMART); IPR013088 (G3DSA:3.30.50.GENE3D); IPR000536 (PFAM); IPR001628 (PFAM); G3DSA:1.10.565.10 (GENE3D); mobidb-lite (MOBIDB_LITE); mobidb-lite (MOBIDB_LITE); mobidb-lite (MOBIDB_LITE); mobidb-lite (MOBIDB_LITE); PTHR24083:SF100 (PANTHER); PTHR24083 (PANTHER); IPR000536 (PROSITE_PROFILES); IPR001628 (PROSIT…	F:GO:0003677; F:GO:0003700; F:GO:0003707; C:GO:0005634; P:GO:0006355; F:GO:0008270; F:GO:0043565	F:DNA binding; F:DNA-binding transcription factor activity; F:steroid hormone receptor activity; C:nucleus; P:regulation of transcription, DNA-templated; F:zinc ion binding; F:sequence-specific DNA binding
SPF_FS5_contig_677	[INTERPRO, BLASTED, MAPPED, GO-SLIM]	myotubularin-related protein 14 isoform X1	2734	15	1.11568e-143	66.66	3	F:GO:0004438; F:GO:0004725; P:GO:0035335	F:phosphatidylinositol-3-phosphatase activity; F:protein tyrosine phosphatase activity; P:peptidyl-tyrosine dephosphorylation	EC:3.1.3.16; EC:3.1.3.48; EC:3.1.3.64	Protein-serine/threonine phosphatase; Protein-tyrosine-phosphatase; Phosphatidylinositol-3-phosphatase	mobidb-lite (MOBIDB_LITE); IPR039802 (PANTHER); PTHR13524:SF2 (PANTHER); IPR000387 (PROSITE_PROFILES); IPR039803 (CDD); IPR029021 (SUPERFAMILY)	F:GO:0004438; P:GO:0016311; F:GO:0016791	F:phosphatidylinositol-3-phosphatase activity; P:dephosphorylation; F:phosphatase activity
SPF_FS5_contig_678	[BLASTED, MAPPED, ANNOTATED]	Cubilin	12132	15	0	58.82	1	F:GO:0005509	F:calcium ion binding
SPF_FS5_contig_681	[INTERPRO, BLASTED, MAPPED, GO-SLIM]	defensin	1997	7	1.52701e-11	67.28	3	F:GO:0003677; P:GO:0006259; P:GO:0032196	F:DNA binding; P:DNA metabolic process; P:transposition			mobidb-lite (MOBIDB_LITE); mobidb-lite (MOBIDB_LITE)	no GO terms	no GO terms
SPF_FS5_contig_682	[INTERPRO, BLASTED, MAPPED, GO-SLIM]	multifunctional protein ADE2-like	512	15	9.64511e-53	85.51	4	P:GO:0009058; F:GO:0016874; P:GO:0034641; P:GO:0044281	P:biosynthetic process; F:ligase activity; P:cellular nitrogen compound metabolic process; P:small molecule metabolic process	EC:6.3.2.6	Phosphoribosylaminoimidazolesuccinocarboxamide synthase	IPR000031 (SMART); IPR000031 (PFAM); IPR035893 (G3DSA:3.40.50.GENE3D); PTHR43599 (PANTHER); PTHR43599:SF2 (PANTHER); IPR035893 (SUPERFAMILY)	P:GO:0006189	P:'de novo' IMP biosynthetic process
SPF_FS5_contig_683	[BLASTED, MAPPED, ANNOTATED]	putative ferric-chelate reductase 1 isoform X1	1940	15	1.11821e-45	51.69	1	C:GO:0016020	C:membrane
SPF_FS5_contig_685	[INTERPRO, BLASTED, MAPPED, GO-SLIM]	gelsolin-like protein 2	1634	15	1.26493e-143	70.03	1	F:GO:0008092	F:cytoskeletal protein binding			IPR007122 (PRINTS); IPR007122 (SMART); IPR029006 (G3DSA:3.40.20.GENE3D); IPR007123 (PFAM); IPR029006 (G3DSA:3.40.20.GENE3D); IPR029006 (G3DSA:3.40.20.GENE3D); IPR007122 (PANTHER); PTHR11977:SF53 (PANTHER); cd11290 (CDD); cd11289 (CDD); SSF55753 (SUPERFAMILY); SSF55753 (SUPERFAMILY); SSF55753 (SUPERFAMILY)	F:GO:0051015	F:actin filament binding
SPF_FS5_contig_687	[INTERPRO, BLASTED, MAPPED, GO-SLIM]	DNA-directed RNA polymerases I, II, and III subunit RPABC3	936	15	2.83551e-80	89.91	9	F:GO:0001054; F:GO:0001055; F:GO:0001056; C:GO:0005665; C:GO:0005666; C:GO:0005736; P:GO:0006360; P:GO:0006366; P:GO:0006383	F:RNA polymerase I activity; F:RNA polymerase II activity; F:RNA polymerase III activity; C:RNA polymerase II, core complex; C:RNA polymerase III complex; C:RNA polymerase I complex; P:transcription by RNA polymerase I; P:transcription by RNA polymerase II; P:transcription by RNA polymerase III	EC:2.7.7.6	DNA-directed RNA polymerase	IPR005570 (SMART); IPR005570 (PIRSF); IPR005570 (PFAM); G3DSA:2.40.50.140 (GENE3D); IPR005570 (PANTHER); PTHR10917:SF0 (PANTHER); IPR012340 (SUPERFAMILY)	P:GO:0006351	P:transcription, DNA-templated
SPF_FS5_contig_688	[INTERPRO, BLASTED, MAPPED, GO-SLIM]	ATP-binding cassette sub-family D member 4	2624	15	1.23191e-126	56.18	7	F:GO:0005524; P:GO:0009987; C:GO:0016021; F:GO:0042626; C:GO:0043231; C:GO:0044444; P:GO:0055085	F:ATP binding; P:cellular process; C:integral component of membrane; F:ATPase-coupled transmembrane transporter activity; C:intracellular membrane-bounded organelle; C:obsolete cytoplasmic part; P:transmembrane transport	EC:3.6.1.3; EC:3.6.1.15	Adenosinetriphosphatase; Nucleoside-triphosphate phosphatase	IPR003593 (SMART); G3DSA:3.40.50.300 (GENE3D); IPR011527 (PFAM); IPR003439 (PFAM); PTHR11384:SF28 (PANTHER); PTHR11384 (PANTHER); IPR011527 (PROSITE_PROFILES); IPR003439 (PROSITE_PROFILES); cd03223 (CDD); IPR027417 (SUPERFAMILY); IPR036640 (SUPERFAMILY)	F:GO:0005524; C:GO:0016021; F:GO:0016887; F:GO:0042626; P:GO:0055085	F:ATP binding; C:integral component of membrane; F:ATPase activity; F:ATPase-coupled transmembrane transporter activity; P:transmembrane transport
SPF_FS5_contig_689	[INTERPRO, BLASTED, MAPPED, GO-SLIM]	organic solute transporter subunit alpha-like	1991	15	7.50671e-45	54.54	1	C:GO:0005575	C:cellular_component			IPR005178 (PFAM); mobidb-lite (MOBIDB_LITE); PTHR23423:SF21 (PANTHER); IPR005178 (PANTHER)	no GO terms	no GO terms
SPF_FS5_contig_690	[INTERPRO, BLASTED, MAPPED, GO-SLIM]	Nascent polypeptide-associated complex subunit alpha	1123	15	1.03038e-75	87.6	2	C:GO:0005737; C:GO:0032991	C:cytoplasm; C:protein-containing complex			IPR002715 (SMART); G3DSA:1.10.8.10 (GENE3D); IPR016641 (PIRSF); IPR002715 (PFAM); IPR038187 (G3DSA:2.20.70.GENE3D); mobidb-lite (MOBIDB_LITE); mobidb-lite (MOBIDB_LITE); mobidb-lite (MOBIDB_LITE); mobidb-lite (MOBIDB_LITE); IPR016641 (PANTHER); PTHR21713:SF1 (PANTHER); IPR002715 (PROSITE_PROFILES); cd14415 (CDD)	C:GO:0005854	C:nascent polypeptide-associated complex
SPF_FS5_contig_691	[INTERPRO, BLASTED, MAPPED, GO-SLIM]	Transcription initiation factor TFIID subunit 2	3747	15	0	74.56	4	C:GO:0005669; F:GO:0008237; F:GO:0008270; P:GO:0019538	C:transcription factor TFIID complex; F:metallopeptidase activity; F:zinc ion binding; P:protein metabolic process			IPR014782 (PFAM); G3DSA:1.10.390.60 (GENE3D); G3DSA:2.60.40.1730 (GENE3D); mobidb-lite (MOBIDB_LITE); mobidb-lite (MOBIDB_LITE); mobidb-lite (MOBIDB_LITE); mobidb-lite (MOBIDB_LITE); mobidb-lite (MOBIDB_LITE); IPR037813 (PANTHER); cd09839 (CDD); SSF55486 (SUPERFAMILY); SSF63737 (SUPERFAMILY); IPR016024 (SUPERFAMILY)	C:GO:0005669; F:GO:0008237; F:GO:0008270	C:transcription factor TFIID complex; F:metallopeptidase activity; F:zinc ion binding
SPF_FS5_contig_695	[INTERPRO, BLASTED, MAPPED, GO-SLIM]	multidrug resistance-associated protein 4-like	3435	15	1.63282e-171	63.82	4	F:GO:0005524; C:GO:0016021; F:GO:0042626; P:GO:0055085	F:ATP binding; C:integral component of membrane; F:ATPase-coupled transmembrane transporter activity; P:transmembrane transport	EC:3.6.1.3; EC:3.6.1.15	Adenosinetriphosphatase; Nucleoside-triphosphate phosphatase	IPR003593 (SMART); IPR011527 (PFAM); IPR003439 (PFAM); IPR036640 (G3DSA:1.20.1560.GENE3D); G3DSA:3.40.50.300 (GENE3D); mobidb-lite (MOBIDB_LITE); mobidb-lite (MOBIDB_LITE); IPR030240 (PTHR24223:PANTHER); PTHR24223 (PANTHER); IPR003439 (PROSITE_PROFILES); IPR011527 (PROSITE_PROFILES); cd03244 (CDD); IPR036640 (SUPERFAMILY); IPR027417 (SUPERFAMILY)	F:GO:0005524; C:GO:0016021; F:GO:0016887; F:GO:0042626; P:GO:0055085	F:ATP binding; C:integral component of membrane; F:ATPase activity; F:ATPase-coupled transmembrane transporter activity; P:transmembrane transport
SPF_FS5_contig_696	[BLASTED, MAPPED, ANNOTATED]	probable maltase isoform X1	2300	15	7.6834e-120	54.55	1	C:GO:0016020	C:membrane
SPF_FS5_contig_698	[INTERPRO, BLASTED, MAPPED, GO-SLIM]	peroxidase-like isoform X1	2536	15	1.83782e-136	58.23	4	F:GO:0004601; P:GO:0006979; F:GO:0020037; P:GO:0055114	F:peroxidase activity; P:response to oxidative stress; F:heme binding; P:oxidation-reduction process			IPR019791 (PRINTS); IPR037120 (G3DSA:1.10.640.GENE3D); IPR019791 (PFAM); PTHR11475:SF107 (PANTHER); PTHR11475 (PANTHER); IPR019791 (PROSITE_PROFILES); cd09823 (CDD); IPR010255 (SUPERFAMILY)	F:GO:0004601; P:GO:0006979; F:GO:0020037; P:GO:0055114	F:peroxidase activity; P:response to oxidative stress; F:heme binding; P:oxidation-reduction process
SPF_FS5_contig_699	[INTERPRO, BLASTED, MAPPED, GO-SLIM]	valine--tRNA ligase	3425	15	0	79.28	6	F:GO:0002161; F:GO:0004832; F:GO:0005524; C:GO:0005829; P:GO:0006438; P:GO:0106074	F:aminoacyl-tRNA editing activity; F:valine-tRNA ligase activity; F:ATP binding; C:cytosol; P:valyl-tRNA aminoacylation; P:aminoacyl-tRNA metabolism involved in translational fidelity	EC:6.1.1.9; EC:3.1.1.1	Valine--tRNA ligase; Carboxylesterase	IPR002303 (PRINTS); IPR002300 (PFAM); IPR009008 (G3DSA:3.90.740.GENE3D); IPR002303 (TIGRFAM); IPR014729 (G3DSA:3.40.50.GENE3D); G3DSA:1.10.730.10 (GENE3D); IPR013155 (PFAM); IPR014729 (G3DSA:3.40.50.GENE3D); mobidb-lite (MOBIDB_LITE); mobidb-lite (MOBIDB_LITE); mobidb-lite (MOBIDB_LITE); mobidb-lite (MOBIDB_LITE); PTHR11946 (PANTHER); PTHR11946:SF54 (PANTHER); IPR002303 (HAMAP); cd00817 (CDD); IP…	F:GO:0000166; F:GO:0002161; F:GO:0004812; F:GO:0004832; F:GO:0005524; P:GO:0006418; P:GO:0006438	F:nucleotide binding; F:aminoacyl-tRNA editing activity; F:aminoacyl-tRNA ligase activity; F:valine-tRNA ligase activity; F:ATP binding; P:tRNA aminoacylation for protein translation; P:valyl-tRNA aminoacylation
SPF_FS5_contig_701	[INTERPRO, BLASTED, MAPPED, GO-SLIM]	ATP-binding cassette sub-family G member 2	2645	15	0	70.92	3	F:GO:0005524; C:GO:0016020; F:GO:0016887	F:ATP binding; C:membrane; F:ATPase activity			IPR003593 (SMART); G3DSA:3.40.50.300 (GENE3D); IPR003439 (PFAM); IPR013525 (PFAM); mobidb-lite (MOBIDB_LITE); PTHR19241:SF343 (PANTHER); PTHR19241 (PANTHER); IPR003439 (PROSITE_PROFILES); cd03213 (CDD); IPR027417 (SUPERFAMILY)	F:GO:0005524; C:GO:0016020; F:GO:0016887	F:ATP binding; C:membrane; F:ATPase activity
SPF_FS5_contig_703	[INTERPRO, BLASTED, MAPPED, GO-SLIM]	cleavage and polyadenylation specificity factor subunit 2	2889	15	0	73.65	3	C:GO:0005847; P:GO:0006378; P:GO:0006379	C:mRNA cleavage and polyadenylation specificity factor complex; P:mRNA polyadenylation; P:mRNA cleavage			IPR022712 (SMART); IPR001279 (PFAM); IPR036866 (G3DSA:3.60.15.GENE3D); IPR025069 (PFAM); IPR011108 (PFAM); IPR022712 (PFAM); mobidb-lite (MOBIDB_LITE); mobidb-lite (MOBIDB_LITE); mobidb-lite (MOBIDB_LITE); IPR027075 (PTHR11203:PANTHER); PTHR11203 (PANTHER); IPR035639 (CDD); IPR036866 (SUPERFAMILY)	C:GO:0005847; P:GO:0006378; P:GO:0006379	C:mRNA cleavage and polyadenylation specificity factor complex; P:mRNA polyadenylation; P:mRNA cleavage
SPF_FS5_contig_704	[INTERPRO, BLASTED, MAPPED, GO-SLIM]	arachidonate 5-lipoxygenase	406	15	8.16024e-25	59.34	4	F:GO:0016702; C:GO:0044428; F:GO:0046872; P:GO:0055114	F:oxidoreductase activity, acting on single donors with incorporation of molecular oxygen, incorporation of two atoms of oxygen; C:obsolete nuclear part; F:metal ion binding; P:oxidation-reduction process			G3DSA:1.20.245.10 (GENE3D); IPR013819 (PFAM); IPR000907 (PANTHER); IPR013819 (PROSITE_PROFILES); IPR036226 (SUPERFAMILY)	F:GO:0016702; F:GO:0046872; P:GO:0055114	F:oxidoreductase activity, acting on single donors with incorporation of molecular oxygen, incorporation of two atoms of oxygen; F:metal ion binding; P:oxidation-reduction process
SPF_FS5_contig_705	[BLASTED, MAPPED, ANNOTATED]	high mobility group protein B3-like	1528	15	1.19035e-35	60.68	2	F:GO:0003677; C:GO:0005634	F:DNA binding; C:nucleus
SPF_FS5_contig_706	[BLASTED, MAPPED, ANNOTATED]	microtubule-associated protein futsch-like isoform X2	2102	15	2.31157e-107	57.39	3	P:GO:0000226; C:GO:0005874; F:GO:0008017	P:microtubule cytoskeleton organization; C:microtubule; F:microtubule binding
SPF_FS5_contig_707	[INTERPRO, BLASTED, MAPPED, GO-SLIM]	aldo/keto reductase	525	15	5.8245e-26	69.73	2	F:GO:0016491; P:GO:0055114	F:oxidoreductase activity; P:oxidation-reduction process			IPR036812 (G3DSA:3.20.20.GENE3D); IPR023210 (PFAM); PTHR11732:SF373 (PANTHER); IPR020471 (PANTHER); IPR036812 (SUPERFAMILY)	F:GO:0016491; P:GO:0055114	F:oxidoreductase activity; P:oxidation-reduction process
SPF_FS5_contig_709	[INTERPRO, BLASTED, MAPPED, GO-SLIM]	phenylalanine-4-hydroxylase isoform X2	672	15	1.63719e-36	61.91	4	F:GO:0005506; P:GO:0009072; F:GO:0016714; P:GO:0055114	F:iron ion binding; P:aromatic amino acid family metabolic process; F:oxidoreductase activity, acting on paired donors, with incorporation or reduction of molecular oxygen, reduced pteridine as one donor, and incorporation of one atom of oxygen; P:oxidation-reduction process			IPR036951 (G3DSA:1.10.800.GENE3D); IPR019774 (PFAM); IPR001273 (PANTHER); IPR019774 (PROSITE_PROFILES); SSF55021 (SUPERFAMILY); IPR036329 (SUPERFAMILY)	F:GO:0004497; F:GO:0005506; P:GO:0009072; F:GO:0016714; P:GO:0055114	F:monooxygenase activity; F:iron ion binding; P:aromatic amino acid family metabolic process; F:oxidoreductase activity, acting on paired donors, with incorporation or reduction of molecular oxygen, reduced pteridine as one donor, and incorporation of one atom of oxygen; P:oxidation-reduction process
SPF_FS5_contig_711	[INTERPRO, BLASTED, MAPPED, GO-SLIM]	phenylalanine-4-hydroxylase isoform X1	786	15	2.15978e-77	66.99	5	F:GO:0005506; P:GO:0009072; F:GO:0016714; P:GO:0055114; P:GO:1901605	F:iron ion binding; P:aromatic amino acid family metabolic process; F:oxidoreductase activity, acting on paired donors, with incorporation or reduction of molecular oxygen, reduced pteridine as one donor, and incorporation of one atom of oxygen; P:oxidation-reduction process; P:alpha-amino acid metabolic process	EC:1.14.16	Acting on paired donors, with incorporation or reduction of molecular oxygen. The oxygen incorporated need not be derived from O(2)	IPR019774 (PRINTS); IPR036951 (G3DSA:1.10.800.GENE3D); IPR019774 (PFAM); mobidb-lite (MOBIDB_LITE); IPR001273 (PANTHER); IPR019774 (PROSITE_PROFILES); SSF55021 (SUPERFAMILY); IPR036329 (SUPERFAMILY)	F:GO:0004497; F:GO:0005506; P:GO:0009072; F:GO:0016714; P:GO:0055114	F:monooxygenase activity; F:iron ion binding; P:aromatic amino acid family metabolic process; F:oxidoreductase activity, acting on paired donors, with incorporation or reduction of molecular oxygen, reduced pteridine as one donor, and incorporation of one atom of oxygen; P:oxidation-reduction process
SPF_FS5_contig_713	[INTERPRO, BLASTED, MAPPED, GO-SLIM]	Uridine phosphorylase 2	1141	15	8.51182e-13	68.93	6	C:GO:0005654; C:GO:0005829; P:GO:0009058; F:GO:0016757; P:GO:0034655; P:GO:0044281	C:nucleoplasm; C:cytosol; P:biosynthetic process; F:transferase activity, transferring glycosyl groups; P:nucleobase-containing compound catabolic process; P:small molecule metabolic process	EC:2.4.2.3	Uridine phosphorylase	no IPS match	no IPS match	no IPS match
SPF_FS5_contig_714	[INTERPRO, BLASTED, MAPPED, GO-SLIM]	transcription initiation factor TFIID subunit 5	3446	15	0	74.4	5	F:GO:0003743; F:GO:0005515; C:GO:0005669; P:GO:0006413; F:GO:0016746	F:translation initiation factor activity; F:protein binding; C:transcription factor TFIID complex; P:translational initiation; F:transferase activity, transferring acyl groups			IPR020472 (PRINTS); IPR001680 (SMART); IPR006594 (SMART); IPR001680 (PFAM); IPR037264 (G3DSA:1.25.40.GENE3D); IPR007582 (PFAM); IPR015943 (G3DSA:2.130.10.GENE3D); mobidb-lite (MOBIDB_LITE); IPR037783 (PTHR19879:PANTHER); PTHR19879 (PANTHER); IPR001680 (PROSITE_PROFILES); IPR017986 (PROSITE_PROFILES); IPR017986 (PROSITE_PROFILES); IPR006594 (PROSITE_PROFILES); IPR001680 (PROSITE_PROFILES); IPR0016…	F:GO:0005515; C:GO:0005669	F:protein binding; C:transcription factor TFIID complex
SPF_FS5_contig_717	[INTERPRO, BLASTED, MAPPED, GO-SLIM]	mitochondrial-processing peptidase subunit beta	1171	15	0	86.72	5	F:GO:0004222; C:GO:0005743; P:GO:0006627; C:GO:0017087; F:GO:0046872	F:metalloendopeptidase activity; C:mitochondrial inner membrane; P:protein processing involved in protein targeting to mitochondrion; C:mitochondrial processing peptidase complex; F:metal ion binding	EC:3.4.24	Acting on peptide bonds (peptidases)	G3DSA:3.30.830.10 (GENE3D); IPR011765 (PFAM); G3DSA:3.30.830.10 (GENE3D); IPR007863 (PFAM); PTHR11851 (PANTHER); IPR037718 (PTHR11851:PANTHER); IPR011249 (SUPERFAMILY); IPR011249 (SUPERFAMILY)	F:GO:0003824; F:GO:0004222; P:GO:0006627; C:GO:0017087; F:GO:0046872	F:catalytic activity; F:metalloendopeptidase activity; P:protein processing involved in protein targeting to mitochondrion; C:mitochondrial processing peptidase complex; F:metal ion binding
SPF_FS5_contig_718	[INTERPRO, BLASTED, MAPPED, GO-SLIM]	heat shock 70 kDa protein 14	1901	15	3.36119e-133	59.73	3	F:GO:0003674; C:GO:0005737; P:GO:0006950	F:molecular_function; C:cytoplasm; P:response to stress			IPR013126 (PRINTS); G3DSA:3.30.420.40 (GENE3D); G3DSA:3.90.640.10 (GENE3D); IPR013126 (PFAM); G3DSA:3.30.420.40 (GENE3D); G3DSA:3.30.30.30 (GENE3D); PTHR19375:SF331 (PANTHER); IPR013126 (PANTHER); SSF53067 (SUPERFAMILY); IPR029047 (SUPERFAMILY); SSF53067 (SUPERFAMILY)	no GO terms	no GO terms
SPF_FS5_contig_719	[INTERPRO, BLASTED, MAPPED, GO-SLIM]	acyloxyacyl hydrolase-like	1943	15	0	61.36	1	F:GO:0050528	F:acyloxyacyl hydrolase activity			IPR001087 (PFAM); G3DSA:1.10.225.10 (GENE3D); IPR039676 (PANTHER); IPR011001 (SUPERFAMILY); SSF52266 (SUPERFAMILY)	F:GO:0016788; F:GO:0050528	F:hydrolase activity, acting on ester bonds; F:acyloxyacyl hydrolase activity
SPF_FS5_contig_720	[INTERPRO, BLASTED, MAPPED, GO-SLIM]	Soma ferritin	507	15	4.4463e-22	91.82	8	F:GO:0004322; C:GO:0005737; P:GO:0006826; P:GO:0006880; F:GO:0008198; F:GO:0008199; F:GO:0042802; P:GO:0055114	F:ferroxidase activity; C:cytoplasm; P:iron ion transport; P:intracellular sequestering of iron ion; F:ferrous iron binding; F:ferric iron binding; F:identical protein binding; P:oxidation-reduction process	EC:1.16.3.1; EC:1.16.3	Ferroxidase; Oxidizing metal ions	IPR008331 (PFAM); IPR012347 (G3DSA:1.20.1260.GENE3D); IPR001519 (PANTHER); PTHR11431:SF37 (PANTHER); IPR009040 (PROSITE_PROFILES); IPR009078 (SUPERFAMILY)	P:GO:0006826; P:GO:0006879; F:GO:0008199	P:iron ion transport; P:cellular iron ion homeostasis; F:ferric iron binding
SPF_FS5_contig_721	[INTERPRO, BLASTED, MAPPED, GO-SLIM]	mitochondrial-processing peptidase subunit beta	719	15	1.38291e-112	83.04	5	F:GO:0004222; C:GO:0005743; P:GO:0006627; C:GO:0017087; F:GO:0046872	F:metalloendopeptidase activity; C:mitochondrial inner membrane; P:protein processing involved in protein targeting to mitochondrion; C:mitochondrial processing peptidase complex; F:metal ion binding	EC:3.4.24	Acting on peptide bonds (peptidases)	IPR007863 (PFAM); G3DSA:3.30.830.10 (GENE3D); IPR037718 (PTHR11851:PANTHER); PTHR11851 (PANTHER); IPR011249 (SUPERFAMILY)	F:GO:0003824; F:GO:0004222; P:GO:0006627; C:GO:0017087; F:GO:0046872	F:catalytic activity; F:metalloendopeptidase activity; P:protein processing involved in protein targeting to mitochondrion; C:mitochondrial processing peptidase complex; F:metal ion binding
SPF_FS5_contig_723	[INTERPRO, BLASTED, MAPPED, GO-SLIM]	XChain X, E2~ubiquitin-Hect	539	15	1.11377e-37	97.88	4	F:GO:0003735; F:GO:0005515; C:GO:0005840; P:GO:0006412	F:structural constituent of ribosome; F:protein binding; C:ribosome; P:translation			IPR019956 (PRINTS); IPR000626 (SMART); IPR002906 (SMART); G3DSA:3.10.20.90 (GENE3D); IPR038582 (G3DSA:2.20.25.GENE3D); IPR002906 (PFAM); IPR000626 (PFAM); mobidb-lite (MOBIDB_LITE); PTHR10666 (PANTHER); PTHR10666:SF258 (PANTHER); IPR000626 (PROSITE_PROFILES); cd01803 (CDD); IPR011332 (SUPERFAMILY); IPR029071 (SUPERFAMILY)	F:GO:0003735; F:GO:0005515; C:GO:0005840; P:GO:0006412	F:structural constituent of ribosome; F:protein binding; C:ribosome; P:translation
SPF_FS5_contig_724	[INTERPRO, BLASTED, MAPPED, GO-SLIM]	pleckstrin homology domain-containing family F member 2-like	1630	15	4.28275e-117	82.44	1	F:GO:0043167	F:ion binding			IPR000306 (SMART); IPR001849 (SMART); IPR011993 (G3DSA:2.30.29.GENE3D); IPR000306 (PFAM); IPR013083 (G3DSA:3.30.40.GENE3D); IPR001849 (PFAM); mobidb-lite (MOBIDB_LITE); PTHR12673 (PANTHER); PTHR12673:SF167 (PANTHER); IPR001849 (PROSITE_PROFILES); IPR017455 (PROSITE_PROFILES); IPR037871 (CDD); cd15717 (CDD); SSF50729 (SUPERFAMILY); IPR011011 (SUPERFAMILY)	F:GO:0046872	F:metal ion binding
SPF_FS5_contig_725	[INTERPRO, BLASTED, MAPPED, GO-SLIM]	eukaryotic peptide chain release factor subunit 1 isoform X1	1955	15	0	93.47	5	P:GO:0002184; C:GO:0005829; F:GO:0016149; C:GO:0018444; F:GO:1990825	P:cytoplasmic translational termination; C:cytosol; F:translation release factor activity, codon specific; C:translation release factor complex; F:sequence-specific mRNA binding			IPR005140 (SMART); IPR005142 (PFAM); G3DSA:3.30.420.60 (GENE3D); IPR024049 (G3DSA:3.30.960.GENE3D); IPR005141 (PFAM); IPR029064 (G3DSA:3.30.1330.GENE3D); IPR004403 (TIGRFAM); IPR005140 (PFAM); IPR004403 (PANTHER); SSF53137 (SUPERFAMILY); IPR029064 (SUPERFAMILY); IPR024049 (SUPERFAMILY)	F:GO:0003747; C:GO:0005737; P:GO:0006415	F:translation release factor activity; C:cytoplasm; P:translational termination
SPF_FS5_contig_727	[INTERPRO, BLASTED, MAPPED, GO-SLIM]	60S acidic ribosomal protein P0	1158	15	9.05692e-131	86.38	6	P:GO:0000027; P:GO:0002181; F:GO:0003735; F:GO:0016829; C:GO:0022625; F:GO:0070180	P:ribosomal large subunit assembly; P:cytoplasmic translation; F:structural constituent of ribosome; F:lyase activity; C:cytosolic large ribosomal subunit; F:large ribosomal subunit rRNA binding			PF00428 (PFAM); G3DSA:3.90.105.20 (GENE3D); IPR030670 (PIRSF); IPR040637 (PFAM); IPR001790 (PFAM); mobidb-lite (MOBIDB_LITE); mobidb-lite (MOBIDB_LITE); PTHR21141:SF3 (PANTHER); PTHR21141 (PANTHER); cd05795 (CDD); SSF160369 (SUPERFAMILY)	C:GO:0005622; P:GO:0042254	C:intracellular; P:ribosome biogenesis
SPF_FS5_contig_730	[INTERPRO, BLASTED, MAPPED, GO-SLIM]	fragile X mental retardation syndrome-related protein 1 isoform X5	3271	15	2.04952e-92	63.71	8	F:GO:0003729; C:GO:0005737; P:GO:0006417; C:GO:0035770; C:GO:0036477; C:GO:0043005; P:GO:0048856; C:GO:0098794	F:mRNA binding; C:cytoplasm; P:regulation of translation; C:ribonucleoprotein granule; C:somatodendritic compartment; C:neuron projection; P:anatomical structure development; C:postsynapse			IPR004087 (SMART); G3DSA:2.30.30.140 (GENE3D); G3DSA:2.30.30.140 (GENE3D); IPR004088 (PFAM); IPR040472 (PFAM); IPR041560 (PFAM); IPR036612 (G3DSA:3.30.1370.GENE3D); IPR036612 (G3DSA:3.30.1370.GENE3D); mobidb-lite (MOBIDB_LITE); mobidb-lite (MOBIDB_LITE); mobidb-lite (MOBIDB_LITE); mobidb-lite (MOBIDB_LITE); mobidb-lite (MOBIDB_LITE); mobidb-lite (MOBIDB_LITE); IPR040148 (PANTHER); PS50084 (PROSIT…	F:GO:0003676; F:GO:0003723; F:GO:0003729; P:GO:0006417	F:nucleic acid binding; F:RNA binding; F:mRNA binding; P:regulation of translation
SPF_FS5_contig_731	[INTERPRO, BLASTED, MAPPED, GO-SLIM]	ESF1 homolog isoform X1	3145	15	4.44965e-102	60.42	3	F:GO:0003723; P:GO:0006364; C:GO:0031981	F:RNA binding; P:rRNA processing; C:nuclear lumen			IPR012580 (PFAM); mobidb-lite (MOBIDB_LITE); mobidb-lite (MOBIDB_LITE); mobidb-lite (MOBIDB_LITE); mobidb-lite (MOBIDB_LITE); mobidb-lite (MOBIDB_LITE); mobidb-lite (MOBIDB_LITE); mobidb-lite (MOBIDB_LITE); mobidb-lite (MOBIDB_LITE); mobidb-lite (MOBIDB_LITE); mobidb-lite (MOBIDB_LITE); mobidb-lite (MOBIDB_LITE); mobidb-lite (MOBIDB_LITE); mobidb-lite (MOBIDB_LITE); IPR039754 (PANTHER)	C:GO:0005634; P:GO:0006364	C:nucleus; P:rRNA processing
SPF_FS5_contig_732	[INTERPRO, BLASTED, MAPPED, GO-SLIM]	arylsulfatase B-like	2245	15	0	65.54	1	F:GO:0008484	F:sulfuric ester hydrolase activity			IPR017849 (G3DSA:3.40.720.GENE3D); IPR000917 (PFAM); G3DSA:3.30.1120.10 (GENE3D); PTHR10342:SF262 (PANTHER); PTHR10342 (PANTHER); cd16029 (CDD); IPR017850 (SUPERFAMILY)	F:GO:0003824; F:GO:0008484	F:catalytic activity; F:sulfuric ester hydrolase activity
SPF_FS5_contig_734	[INTERPRO, BLASTED, MAPPED, GO-SLIM]	TOM1-like protein 2 isoform X3	2394	15	1.66443e-123	61.34	2	C:GO:0005622; P:GO:0006886	C:intracellular; P:intracellular protein transport			IPR002014 (SMART); IPR008942 (G3DSA:1.25.40.GENE3D); IPR002014 (PFAM); IPR038425 (G3DSA:1.20.58.GENE3D); IPR004152 (PFAM); IPR014645 (PIRSF); mobidb-lite (MOBIDB_LITE); mobidb-lite (MOBIDB_LITE); mobidb-lite (MOBIDB_LITE); PTHR13856 (PANTHER); IPR027429 (PTHR13856:PANTHER); IPR002014 (PROSITE_PROFILES); IPR004152 (PROSITE_PROFILES); cd14233 (CDD); IPR008942 (SUPERFAMILY); SSF89009 (SUPERFAMILY)	C:GO:0005622; P:GO:0006886	C:intracellular; P:intracellular protein transport
SPF_FS5_contig_739	[INTERPRO, BLASTED, MAPPED, GO-SLIM]	soma ferritin-like	769	15	1.26524e-55	69.67	7	F:GO:0004322; C:GO:0005737; P:GO:0006826; P:GO:0006880; F:GO:0008198; F:GO:0008199; F:GO:0042802	F:ferroxidase activity; C:cytoplasm; P:iron ion transport; P:intracellular sequestering of iron ion; F:ferrous iron binding; F:ferric iron binding; F:identical protein binding	EC:1.16.3.1; EC:1.16.3	Ferroxidase; Oxidizing metal ions	IPR008331 (PFAM); IPR012347 (G3DSA:1.20.1260.GENE3D); IPR001519 (PANTHER); IPR009040 (PROSITE_PROFILES); cd01056 (CDD); IPR009078 (SUPERFAMILY)	P:GO:0006826; P:GO:0006879; F:GO:0008199	P:iron ion transport; P:cellular iron ion homeostasis; F:ferric iron binding
SPF_FS5_contig_741	[INTERPRO, BLASTED, MAPPED, GO-SLIM]	translation elongation factor 2	2945	15	0	90.49	5	F:GO:0003924; C:GO:0005829; F:GO:0008135; C:GO:0032991; F:GO:0043167	F:GTPase activity; C:cytosol; F:translation factor activity, RNA binding; C:protein-containing complex; F:ion binding	EC:3.6.1.15	Nucleoside-triphosphate phosphatase	IPR000795 (PRINTS); IPR005517 (SMART); IPR000640 (SMART); IPR005225 (TIGRFAM); G3DSA:2.40.30.10 (GENE3D); G3DSA:3.30.70.870 (GENE3D); G3DSA:3.90.1430.10 (GENE3D); G3DSA:3.30.70.240 (GENE3D); G3DSA:3.40.50.300 (GENE3D); IPR014721 (G3DSA:3.30.230.GENE3D); IPR004161 (PFAM); IPR041095 (PFAM); IPR005517 (PFAM); IPR000795 (PFAM); IPR000640 (PFAM); PTHR42908 (PANTHER); PTHR42908:SF10 (PANTHER); IPR00079…	F:GO:0003924; F:GO:0005525	F:GTPase activity; F:GTP binding
SPF_FS5_contig_742	[INTERPRO, BLASTED, MAPPED, GO-SLIM]	calcium-transporting ATPase sarcoplasmic/endoplasmic reticulum type isoform X4	3781	15	0	87.78	6	F:GO:0005388; F:GO:0005524; C:GO:0016021; C:GO:0033017; P:GO:0070588; P:GO:0098655	F:calcium transmembrane transporter activity, phosphorylative mechanism; F:ATP binding; C:integral component of membrane; C:sarcoplasmic reticulum membrane; P:calcium ion transmembrane transport; P:cation transmembrane transport	EC:3.6.1.3; EC:3.6.3.8; EC:3.6.1.15	Adenosinetriphosphatase; Acting on acid anhydrides; Nucleoside-triphosphate phosphatase	PR00119 (PRINTS); IPR004014 (SMART); IPR001757 (TIGRFAM); PF13246 (PFAM); IPR006068 (PFAM); IPR005782 (TIGRFAM); IPR023214 (G3DSA:3.40.50.GENE3D); G3DSA:2.70.150.10 (GENE3D); PF00702 (PFAM); G3DSA:1.20.1110.10 (GENE3D); PF00122 (PFAM); G3DSA:2.70.150.10 (GENE3D); IPR004014 (PFAM); IPR023299 (G3DSA:3.40.1110.GENE3D); PTHR42861 (PANTHER); IPR030332 (PTHR42861:PANTHER); cd02083 (CDD); IPR023299 (SUP…	F:GO:0000166; F:GO:0005388; F:GO:0005524; C:GO:0005783; P:GO:0006816; C:GO:0016021; C:GO:0033017; P:GO:0070588	F:nucleotide binding; F:calcium transmembrane transporter activity, phosphorylative mechanism; F:ATP binding; C:endoplasmic reticulum; P:calcium ion transport; C:integral component of membrane; C:sarcoplasmic reticulum membrane; P:calcium ion transmembrane transport
SPF_FS5_contig_743	[INTERPRO, BLASTED, MAPPED, GO-SLIM]	sodium/hydrogen exchanger 3-like isoform X1	4359	15	0	73.04	5	P:GO:0006814; P:GO:0006885; F:GO:0015385; C:GO:0016021; P:GO:0098662	P:sodium ion transport; P:regulation of pH; F:sodium:proton antiporter activity; C:integral component of membrane; P:inorganic cation transmembrane transport			IPR004709 (PRINTS); IPR006153 (PFAM); IPR004709 (TIGRFAM); mobidb-lite (MOBIDB_LITE); mobidb-lite (MOBIDB_LITE); mobidb-lite (MOBIDB_LITE); mobidb-lite (MOBIDB_LITE); mobidb-lite (MOBIDB_LITE); mobidb-lite (MOBIDB_LITE); mobidb-lite (MOBIDB_LITE); mobidb-lite (MOBIDB_LITE); mobidb-lite (MOBIDB_LITE); mobidb-lite (MOBIDB_LITE); PTHR10110:SF98 (PANTHER); IPR018422 (PANTHER)	P:GO:0006812; P:GO:0006814; P:GO:0006885; F:GO:0015299; F:GO:0015385; C:GO:0016021; P:GO:0055085	P:cation transport; P:sodium ion transport; P:regulation of pH; F:solute:proton antiporter activity; F:sodium:proton antiporter activity; C:integral component of membrane; P:transmembrane transport
SPF_FS5_contig_744	[BLASTED, MAPPED, ANNOTATED]	proteasome-associated protein ECM29 homolog	5443	15	0	62.28	3	C:GO:0000502; P:GO:0043248; F:GO:0060090	C:proteasome complex; P:proteasome assembly; F:molecular adaptor activity
SPF_FS5_contig_745	[INTERPRO, BLASTED, MAPPED, GO-SLIM]	blastula protease 10-like	1009	15	2.63922e-30	53.7	3	F:GO:0004222; P:GO:0006508; F:GO:0008270	F:metalloendopeptidase activity; P:proteolysis; F:zinc ion binding			IPR001506 (PRINTS); IPR006026 (SMART); IPR001506 (PFAM); IPR024079 (G3DSA:3.40.390.GENE3D); PTHR10127 (PANTHER); IPR034035 (CDD); SSF55486 (SUPERFAMILY)	F:GO:0004222; P:GO:0006508; F:GO:0008237; F:GO:0008270	F:metalloendopeptidase activity; P:proteolysis; F:metallopeptidase activity; F:zinc ion binding
SPF_FS5_contig_746	[BLASTED, MAPPED, ANNOTATED]	galectin 4-like protein transcript variant	1242	15	5.68895e-63	60.6	1	F:GO:0030246	F:carbohydrate binding
SPF_FS5_contig_747	[INTERPRO, BLASTED, MAPPED, GO-SLIM]	Bax inhibitor 1	2999	15	7.63605e-76	75.45	1	C:GO:0005575	C:cellular_component			IPR006214 (PFAM); IPR006214 (PANTHER); PTHR23291:SF34 (PANTHER); cd10430 (CDD)	no GO terms	no GO terms
SPF_FS5_contig_748	[INTERPRO, BLASTED, MAPPED, GO-SLIM]	60S ribosomal protein L4	1467	15	0	86.16	3	F:GO:0003735; C:GO:0005840; P:GO:0006412	F:structural constituent of ribosome; C:ribosome; P:translation			IPR023574 (G3DSA:3.40.1370.GENE3D); IPR025755 (PFAM); IPR002136 (PFAM); mobidb-lite (MOBIDB_LITE); PTHR19431 (PANTHER); PTHR19431:SF0 (PANTHER); IPR023574 (SUPERFAMILY)	F:GO:0003735; C:GO:0005840; P:GO:0006412	F:structural constituent of ribosome; C:ribosome; P:translation
SPF_FS5_contig_749	[INTERPRO, BLASTED, MAPPED, GO-SLIM]	60S ribosomal protein L27	939	15	1.75568e-70	91.47	5	F:GO:0003735; P:GO:0006412; C:GO:0022625; P:GO:0030218; C:GO:0098556	F:structural constituent of ribosome; P:translation; C:cytosolic large ribosomal subunit; P:erythrocyte differentiation; C:cytoplasmic side of rough endoplasmic reticulum membrane			IPR005824 (SMART); IPR001141 (PFAM); IPR038655 (G3DSA:2.30.30.GENE3D); IPR005824 (PFAM); IPR001141 (PANTHER); PTHR10497:SF0 (PANTHER); IPR001141 (PRODOM); cd06090 (CDD); IPR008991 (SUPERFAMILY)	F:GO:0003735; C:GO:0005622; C:GO:0005840; P:GO:0006412	F:structural constituent of ribosome; C:intracellular; C:ribosome; P:translation
SPF_FS5_contig_751	[INTERPRO, BLASTED, MAPPED, GO-SLIM]	ATP-binding cassette sub-family E member 1-like	2447	15	0	90.94	6	C:GO:0005623; P:GO:0006412; P:GO:0006913; F:GO:0016887; P:GO:0042254; F:GO:0043167	C:cell; P:translation; P:nucleocytoplasmic transport; F:ATPase activity; P:ribosome biogenesis; F:ion binding	EC:3.6.1.3; EC:3.6.1.15	Adenosinetriphosphatase; Nucleoside-triphosphate phosphatase	IPR013283 (PRINTS); IPR003593 (SMART); G3DSA:3.40.50.300 (GENE3D); G3DSA:3.40.50.300 (GENE3D); IPR003439 (PFAM); IPR017896 (PFAM); IPR007209 (PFAM); IPR003439 (PFAM); IPR013283 (PANTHER); PTHR19248:SF21 (PANTHER); IPR017896 (PROSITE_PROFILES); IPR003439 (PROSITE_PROFILES); IPR017896 (PROSITE_PROFILES); IPR003439 (PROSITE_PROFILES); IPR034348 (CDD); cd03237 (CDD); IPR027417 (SUPERFAMILY); IPR02741…	F:GO:0005524; F:GO:0016887	F:ATP binding; F:ATPase activity
SPF_FS5_contig_752	[INTERPRO, BLASTED, MAPPED, GO-SLIM]	SEC23-interacting protein	1419	15	6.36252e-58	71.18	2	C:GO:0005622; C:GO:0043226	C:intracellular; C:organelle			IPR004170 (PFAM); mobidb-lite (MOBIDB_LITE); mobidb-lite (MOBIDB_LITE); mobidb-lite (MOBIDB_LITE); mobidb-lite (MOBIDB_LITE); PTHR23509 (PANTHER); PTHR23509:SF21 (PANTHER); IPR004170 (PROSITE_PROFILES)	no GO terms	no GO terms
SPF_FS5_contig_753	[INTERPRO, BLASTED, MAPPED, GO-SLIM]	trans-1,2-dihydrobenzene-1,2-diol dehydrogenase-like	1414	15	9.58156e-107	65.11	1	F:GO:0016491	F:oxidoreductase activity			IPR000683 (PFAM); G3DSA:3.40.50.720 (GENE3D); G3DSA:3.30.360.10 (GENE3D); PTHR22604:SF150 (PANTHER); PTHR22604 (PANTHER); SSF55347 (SUPERFAMILY); IPR036291 (SUPERFAMILY)	F:GO:0016491	F:oxidoreductase activity
SPF_FS5_contig_756	[INTERPRO, BLASTED, MAPPED, GO-SLIM]	WD repeat domain phosphoinositide-interacting protein 3-like	3644	15	2.52774e-118	87.11	9	P:GO:0000422; F:GO:0005515; C:GO:0005829; P:GO:0006497; C:GO:0019898; F:GO:0032266; C:GO:0034045; P:GO:0034497; F:GO:0080025	P:autophagy of mitochondrion; F:protein binding; C:cytosol; P:protein lipidation; C:extrinsic component of membrane; F:phosphatidylinositol-3-phosphate binding; C:phagophore assembly site membrane; P:protein localization to phagophore assembly site; F:phosphatidylinositol-3,5-bisphosphate binding			IPR001680 (SMART); IPR015943 (G3DSA:2.130.10.GENE3D); PTHR11227 (PANTHER); IPR036322 (SUPERFAMILY)	F:GO:0005515	F:protein binding
SPF_FS5_contig_757	[INTERPRO, BLASTED, MAPPED, GO-SLIM]	40S ribosomal protein S11	533	15	6.27651e-85	90.32	3	F:GO:0003735; C:GO:0005840; P:GO:0006412	F:structural constituent of ribosome; C:ribosome; P:translation			IPR000266 (PRINTS); IPR028333 (TIGRFAM); IPR000266 (PFAM); IPR032440 (PFAM); G3DSA:2.40.50.1000 (GENE3D); IPR000266 (PANTHER); PTHR10744:SF9 (PANTHER); IPR000266 (PRODOM); IPR012340 (SUPERFAMILY)	F:GO:0003735; C:GO:0005622; C:GO:0005840; P:GO:0006412	F:structural constituent of ribosome; C:intracellular; C:ribosome; P:translation
SPF_FS5_contig_759	[INTERPRO, BLASTED, MAPPED, GO-SLIM]	erythrocyte band 7 integral membrane protein-like	2145	15	1.03744e-92	78.91	1	C:GO:0016021	C:integral component of membrane			IPR001972 (PRINTS); IPR001107 (SMART); IPR001107 (PFAM); G3DSA:3.30.479.30 (GENE3D); mobidb-lite (MOBIDB_LITE); mobidb-lite (MOBIDB_LITE); PTHR10264:SF114 (PANTHER); PTHR10264 (PANTHER); IPR036013 (SUPERFAMILY)	C:GO:0016020	C:membrane
SPF_FS5_contig_760	[INTERPRO, BLASTED, MAPPED, GO-SLIM]	RNA-binding protein 12	3486	15	1.55828e-32	84.95	1	F:GO:0003723	F:RNA binding			IPR000504 (SMART); IPR012677 (G3DSA:3.30.70.GENE3D); IPR000504 (PFAM); IPR012677 (G3DSA:3.30.70.GENE3D); IPR012677 (G3DSA:3.30.70.GENE3D); mobidb-lite (MOBIDB_LITE); mobidb-lite (MOBIDB_LITE); mobidb-lite (MOBIDB_LITE); mobidb-lite (MOBIDB_LITE); mobidb-lite (MOBIDB_LITE); mobidb-lite (MOBIDB_LITE); mobidb-lite (MOBIDB_LITE); mobidb-lite (MOBIDB_LITE); mobidb-lite (MOBIDB_LITE); PTHR13976:SF45 (P…	F:GO:0003676	F:nucleic acid binding
SPF_FS5_contig_761	[INTERPRO, BLASTED, MAPPED, GO-SLIM]	gastrula zinc finger protein XlCGF49.1-like	403	15	5.60621e-36	63.85	1	F:GO:0003674	F:molecular_function			IPR013087 (SMART); IPR013087 (PFAM); G3DSA:3.30.160.60 (GENE3D); G3DSA:3.30.160.60 (GENE3D); G3DSA:3.30.160.60 (GENE3D); PTHR24409:SF292 (PANTHER); PTHR24409 (PANTHER); IPR013087 (PROSITE_PROFILES); IPR013087 (PROSITE_PROFILES); IPR013087 (PROSITE_PROFILES); IPR036236 (SUPERFAMILY); IPR036236 (SUPERFAMILY)	F:GO:0003676	F:nucleic acid binding
SPF_FS5_contig_762	[INTERPRO, BLASTED, MAPPED, GO-SLIM]	zinc finger protein 239-like	528	15	8.06599e-65	65.38	4	F:GO:0003674; C:GO:0005634; P:GO:0009058; P:GO:0034641	F:molecular_function; C:nucleus; P:biosynthetic process; P:cellular nitrogen compound metabolic process			IPR013087 (SMART); G3DSA:3.30.160.60 (GENE3D); IPR013087 (PFAM); G3DSA:3.30.160.60 (GENE3D); G3DSA:3.30.160.60 (GENE3D); PF13894 (PFAM); PTHR43960 (PANTHER); PTHR43960:SF5 (PANTHER); IPR013087 (PROSITE_PROFILES); IPR013087 (PROSITE_PROFILES); IPR013087 (PROSITE_PROFILES); IPR013087 (PROSITE_PROFILES); IPR036236 (SUPERFAMILY); IPR036236 (SUPERFAMILY); IPR036236 (SUPERFAMILY)	F:GO:0003676	F:nucleic acid binding
SPF_FS5_contig_763	[INTERPRO, BLASTED, MAPPED, GO-SLIM]	translationally-controlled tumor protein	903	15	9.00456e-107	70.34	4	C:GO:0005615; C:GO:0005634; C:GO:0005768; C:GO:0005856	C:extracellular space; C:nucleus; C:endosome; C:cytoskeleton			IPR018105 (PRINTS); IPR018105 (PFAM); IPR011323 (G3DSA:2.170.150.GENE3D); mobidb-lite (MOBIDB_LITE); IPR018105 (PANTHER); PTHR11991:SF0 (PANTHER); IPR034737 (PROSITE_PROFILES); IPR011057 (SUPERFAMILY)	no GO terms	no GO terms
SPF_FS5_contig_765	[INTERPRO, BLASTED, MAPPED, GO-SLIM]	alpha-actinin, sarcomeric-like isoform X1	3518	15	0	88.96	2	F:GO:0003779; F:GO:0005509	F:actin binding; F:calcium ion binding			IPR018159 (SMART); SM01184 (SMART); IPR001715 (SMART); IPR002048 (SMART); IPR002017 (PFAM); IPR014837 (PFAM); G3DSA:1.10.238.10 (GENE3D); IPR001715 (PFAM); G3DSA:1.20.58.60 (GENE3D); G3DSA:1.10.238.10 (GENE3D); G3DSA:1.20.58.60 (GENE3D); G3DSA:1.20.58.60 (GENE3D); IPR036872 (G3DSA:1.10.418.GENE3D); G3DSA:1.20.58.60 (GENE3D); IPR036872 (G3DSA:1.10.418.GENE3D); PTHR43947 (PANTHER); PTHR43947:SF1 (P…	F:GO:0005509; F:GO:0005515	F:calcium ion binding; F:protein binding
SPF_FS5_contig_766	[INTERPRO, BLASTED, MAPPED, GO-SLIM]	Fatty aldehyde dehydrogenase	938	15	9.45689e-46	69.35	3	C:GO:0016020; F:GO:0016620; P:GO:0055114	C:membrane; F:oxidoreductase activity, acting on the aldehyde or oxo group of donors, NAD or NADP as acceptor; P:oxidation-reduction process			IPR016163 (G3DSA:3.40.309.GENE3D); IPR015590 (PFAM); PTHR43570 (PANTHER); IPR016161 (SUPERFAMILY)	F:GO:0016491; F:GO:0016620; P:GO:0055114	F:oxidoreductase activity; F:oxidoreductase activity, acting on the aldehyde or oxo group of donors, NAD or NADP as acceptor; P:oxidation-reduction process
SPF_FS5_contig_767	[INTERPRO, BLASTED, MAPPED, GO-SLIM]	dynein heavy chain 2, axonemal-like	14074	15	0	85.52	4	C:GO:0005856; P:GO:0008150; C:GO:0032991; F:GO:0043167	C:cytoskeleton; P:biological_process; C:protein-containing complex; F:ion binding	EC:3.6.1.15	Nucleoside-triphosphate phosphatase	IPR003593 (SMART); IPR041589 (PFAM); IPR041228 (PFAM); G3DSA:1.10.8.720 (GENE3D); G3DSA:1.20.920.20 (GENE3D); IPR013602 (PFAM); G3DSA:1.20.1270.280 (GENE3D); PF12775 (PFAM); G3DSA:3.40.50.300 (GENE3D); IPR035699 (PFAM); IPR035706 (PFAM); IPR013594 (PFAM); G3DSA:1.20.58.1120 (GENE3D); G3DSA:3.20.180.20 (GENE3D); G3DSA:3.40.50.300 (GENE3D); G3DSA:1.10.8.1220 (GENE3D); IPR041658 (PFAM); G3DSA:1.10.8…	F:GO:0003777; F:GO:0005524; P:GO:0007018; C:GO:0030286	F:microtubule motor activity; F:ATP binding; P:microtubule-based movement; C:dynein complex
SPF_FS5_contig_768	[INTERPRO, BLASTED, MAPPED, GO-SLIM]	U3 small nucleolar RNA-associated protein 15 homolog	1786	15	0	69.91	4	F:GO:0005515; C:GO:0005730; P:GO:0006364; P:GO:0045766	F:protein binding; C:nucleolus; P:rRNA processing; P:positive regulation of angiogenesis			IPR020472 (PRINTS); IPR001680 (SMART); IPR018983 (PFAM); IPR015943 (G3DSA:2.130.10.GENE3D); IPR001680 (PFAM); IPR015943 (G3DSA:2.130.10.GENE3D); PTHR19924 (PANTHER); PTHR19924:SF26 (PANTHER); IPR017986 (PROSITE_PROFILES); IPR001680 (PROSITE_PROFILES); IPR001680 (PROSITE_PROFILES); cd00200 (CDD); IPR036322 (SUPERFAMILY)	F:GO:0005515; C:GO:0005730; P:GO:0006364	F:protein binding; C:nucleolus; P:rRNA processing
SPF_FS5_contig_769	[INTERPRO, BLASTED, MAPPED, GO-SLIM]	engulfment and cell motility protein 1	2777	15	0	64.01	3	P:GO:0007010; P:GO:0016192; P:GO:0048870	P:cytoskeleton organization; P:vesicle-mediated transport; P:cell motility			IPR024574 (PFAM); IPR006816 (PFAM); G3DSA:1.10.8.920 (GENE3D); IPR011993 (G3DSA:2.30.29.GENE3D); IPR001849 (PFAM); IPR030719 (PTHR12771:PANTHER); PTHR12771 (PANTHER); IPR001849 (PROSITE_PROFILES); IPR006816 (PROSITE_PROFILES); IPR016024 (SUPERFAMILY); SSF50729 (SUPERFAMILY)	P:GO:0016477	P:cell migration
SPF_FS5_contig_771	[BLASTED, MAPPED, ANNOTATED]	piRNA biogenesis protein EXD1-like	902	15	1.18917e-47	51.32	3	F:GO:0004527; P:GO:0006139; C:GO:0016020	F:exonuclease activity; P:nucleobase-containing compound metabolic process; C:membrane
SPF_FS5_contig_772	[INTERPRO, BLASTED, MAPPED, GO-SLIM]	voltage-dependent anion-selective channel protein 2	1161	15	3.43028e-142	81.74	9	C:GO:0005741; C:GO:0005886; P:GO:0008016; F:GO:0008308; P:GO:0015698; P:GO:0031101; P:GO:0036444; F:GO:0042803; P:GO:0098656	C:mitochondrial outer membrane; C:plasma membrane; P:regulation of heart contraction; F:voltage-gated anion channel activity; P:inorganic anion transport; P:fin regeneration; P:calcium import into the mitochondrion; F:protein homodimerization activity; P:anion transmembrane transport			IPR001925 (PRINTS); IPR027246 (PFAM); IPR023614 (G3DSA:2.40.160.GENE3D); IPR030277 (PTHR11743:PANTHER); IPR001925 (PANTHER); cd07306 (CDD)	C:GO:0005741; F:GO:0008308; P:GO:0055085; P:GO:0098656	C:mitochondrial outer membrane; F:voltage-gated anion channel activity; P:transmembrane transport; P:anion transmembrane transport
SPF_FS5_contig_774	[INTERPRO, BLASTED, MAPPED, GO-SLIM]	tyrosine-protein kinase CSK	2710	15	3.30976e-135	73.79	4	F:GO:0004715; F:GO:0005515; F:GO:0005524; P:GO:0018108	F:non-membrane spanning protein tyrosine kinase activity; F:protein binding; F:ATP binding; P:peptidyl-tyrosine phosphorylation	EC:2.7.10; EC:2.7.10.2	Transferring phosphorus-containing groups; Non-specific protein-tyrosine kinase	IPR000980 (PRINTS); IPR001245 (PRINTS); IPR001452 (SMART); IPR000980 (SMART); IPR020635 (SMART); G3DSA:1.10.510.10 (GENE3D); IPR001245 (PFAM); G3DSA:2.30.30.40 (GENE3D); IPR001452 (PFAM); IPR000980 (PFAM); IPR036860 (G3DSA:3.30.505.GENE3D); mobidb-lite (MOBIDB_LITE); mobidb-lite (MOBIDB_LITE); mobidb-lite (MOBIDB_LITE); mobidb-lite (MOBIDB_LITE); PTHR24418 (PANTHER); PTHR24418:SF294 (PANTHER); PT…	F:GO:0004672; F:GO:0004713; F:GO:0005515; F:GO:0005524; P:GO:0006468	F:protein kinase activity; F:protein tyrosine kinase activity; F:protein binding; F:ATP binding; P:protein phosphorylation
SPF_FS5_contig_775	[INTERPRO, BLASTED, MAPPED, GO-SLIM]	DNA polymerase zeta catalytic subunit	3661	15	0	75.33	6	F:GO:0000166; F:GO:0003677; F:GO:0003887; C:GO:0016035; P:GO:0019985; F:GO:0051536	F:nucleotide binding; F:DNA binding; F:DNA-directed DNA polymerase activity; C:zeta DNA polymerase complex; P:translesion synthesis; F:iron-sulfur cluster binding			IPR006172 (PRINTS); IPR006172 (SMART); G3DSA:1.10.287.690 (GENE3D); IPR023211 (G3DSA:3.90.1600.GENE3D); IPR006133 (PFAM); G3DSA:1.10.132.60 (GENE3D); IPR036397 (G3DSA:3.30.420.GENE3D); IPR006134 (PFAM); IPR025687 (PFAM); mobidb-lite (MOBIDB_LITE); mobidb-lite (MOBIDB_LITE); mobidb-lite (MOBIDB_LITE); mobidb-lite (MOBIDB_LITE); PTHR10322 (PANTHER); IPR030559 (PTHR10322:PANTHER); IPR030559 (PTHR103…	F:GO:0000166; F:GO:0003676; F:GO:0003677; F:GO:0003887; P:GO:0006281; C:GO:0016035; P:GO:0019985	F:nucleotide binding; F:nucleic acid binding; F:DNA binding; F:DNA-directed DNA polymerase activity; P:DNA repair; C:zeta DNA polymerase complex; P:translesion synthesis
SPF_FS5_contig_776	[INTERPRO, BLASTED, MAPPED, GO-SLIM]	unconventional myosin-Va isoform X1	6847	15	0	69.13	4	F:GO:0003774; F:GO:0005524; C:GO:0016459; F:GO:0051015	F:motor activity; F:ATP binding; C:myosin complex; F:actin filament binding			IPR001609 (PRINTS); IPR002710 (SMART); IPR000048 (SMART); IPR001609 (SMART); G3DSA:1.20.58.530 (GENE3D); IPR002710 (PFAM); IPR036961 (G3DSA:3.40.850.GENE3D); IPR008989 (G3DSA:2.30.30.GENE3D); G3DSA:1.20.120.720 (GENE3D); IPR001609 (PFAM); IPR000048 (PFAM); G3DSA:3.30.70.3240 (GENE3D); G3DSA:1.20.5.190 (GENE3D); mobidb-lite (MOBIDB_LITE); mobidb-lite (MOBIDB_LITE); mobidb-lite (MOBIDB_LITE); mobid…	F:GO:0003774; F:GO:0005515; F:GO:0005524; C:GO:0016459; F:GO:0051015	F:motor activity; F:protein binding; F:ATP binding; C:myosin complex; F:actin filament binding
SPF_FS5_contig_778	[BLASTED, MAPPED, ANNOTATED]	Retrovirus-related Pol polyprotein from transposon 297	2470	15	4.031e-50	54.29	1	F:GO:0005488	F:binding
SPF_FS5_contig_780	[BLASTED, MAPPED, ANNOTATED]	hypothetical protein LOTGIDRAFT_162340	1032	15	4.21743e-17	44.31	1	C:GO:0016020	C:membrane
SPF_FS5_contig_781	[INTERPRO, BLASTED, MAPPED, GO-SLIM]	low choriolytic enzyme-like	853	15	1.12087e-28	56.17	3	F:GO:0004222; P:GO:0006508; F:GO:0008270	F:metalloendopeptidase activity; P:proteolysis; F:zinc ion binding			IPR001506 (PRINTS); IPR006026 (SMART); IPR001506 (PFAM); IPR024079 (G3DSA:3.40.390.GENE3D); PTHR10127 (PANTHER); IPR034035 (CDD); SSF55486 (SUPERFAMILY)	F:GO:0004222; P:GO:0006508; F:GO:0008237; F:GO:0008270	F:metalloendopeptidase activity; P:proteolysis; F:metallopeptidase activity; F:zinc ion binding
SPF_FS5_contig_785	[INTERPRO, BLASTED, MAPPED, GO-SLIM]	cytosolic purine 5'-nucleotidase isoform X3	1827	15	3.51755e-165	74.18	1	F:GO:0043167	F:ion binding			IPR008380 (PFAM); IPR023214 (G3DSA:3.40.50.GENE3D); IPR016695 (PIRSF); IPR008380 (TIGRFAM); mobidb-lite (MOBIDB_LITE); mobidb-lite (MOBIDB_LITE); IPR008380 (PANTHER); PTHR12103:SF17 (PANTHER); IPR036412 (SUPERFAMILY)	no GO terms	no GO terms
SPF_FS5_contig_786	[INTERPRO, BLASTED, MAPPED, GO-SLIM]	28S ribosomal protein S9, mitochondrial-like	4142	15	1.15173e-101	66.96	3	F:GO:0003735; C:GO:0005840; P:GO:0006412	F:structural constituent of ribosome; C:ribosome; P:translation			IPR014721 (G3DSA:3.30.230.GENE3D); IPR000754 (PFAM); mobidb-lite (MOBIDB_LITE); mobidb-lite (MOBIDB_LITE); IPR000754 (PANTHER); PTHR21569:SF1 (PANTHER); IPR020568 (SUPERFAMILY)	F:GO:0003735; C:GO:0005840; P:GO:0006412	F:structural constituent of ribosome; C:ribosome; P:translation
SPF_FS5_contig_787	[BLASTED, MAPPED, ANNOTATED]	neuroglian isoform X1	4751	15	0	49.9	3	C:GO:0016020; F:GO:0016853; C:GO:0030017	C:membrane; F:isomerase activity; C:sarcomere
SPF_FS5_contig_788	[INTERPRO, BLASTED, MAPPED, GO-SLIM]	troponin C	769	15	3.14548e-37	70.44	1	F:GO:0005509	F:calcium ion binding			IPR002048 (SMART); G3DSA:1.10.238.10 (GENE3D); G3DSA:1.10.238.10 (GENE3D); IPR002048 (PFAM); PTHR23050:SF263 (PANTHER); PTHR23050 (PANTHER); IPR002048 (PROSITE_PROFILES); IPR002048 (PROSITE_PROFILES); IPR002048 (PROSITE_PROFILES); IPR002048 (CDD); IPR011992 (SUPERFAMILY)	F:GO:0005509	F:calcium ion binding
SPF_FS5_contig_790	[INTERPRO, BLASTED, MAPPED, GO-SLIM]	tropomodulin-like isoform X2	1332	15	2.54163e-122	69.56	3	P:GO:0007010; F:GO:0008092; P:GO:0065003	P:cytoskeleton organization; F:cytoskeletal protein binding; P:protein-containing complex assembly			IPR032675 (G3DSA:3.80.10.GENE3D); IPR004934 (PFAM); mobidb-lite (MOBIDB_LITE); IPR030137 (PTHR10901:PANTHER); IPR004934 (PANTHER); SSF52047 (SUPERFAMILY)	F:GO:0005523; P:GO:0051694	F:tropomyosin binding; P:pointed-end actin filament capping
SPF_FS5_contig_792	[INTERPRO, BLASTED, MAPPED, GO-SLIM]	predicted protein	641	15	5.85505e-12	58.86	2	C:GO:0005764; P:GO:0006665	C:lysosome; P:sphingolipid metabolic process			IPR008373 (PRINTS); IPR008139 (SMART); G3DSA:1.10.225.10 (GENE3D); IPR007856 (PFAM); IPR008138 (PFAM); PTHR11480 (PANTHER); IPR008139 (PROSITE_PROFILES); IPR011001 (SUPERFAMILY)	C:GO:0005764; P:GO:0006629; P:GO:0006665	C:lysosome; P:lipid metabolic process; P:sphingolipid metabolic process
SPF_FS5_contig_794	[INTERPRO, BLASTED, MAPPED, GO-SLIM]	hypoxia-inducible factor 1 alpha	3638	15	2.16783e-74	57.85	6	F:GO:0003700; C:GO:0005634; C:GO:0005667; C:GO:0005737; P:GO:0006355; F:GO:0046983	F:DNA-binding transcription factor activity; C:nucleus; C:transcription factor complex; C:cytoplasm; P:regulation of transcription, DNA-templated; F:protein dimerization activity			IPR001067 (PRINTS); IPR011598 (SMART); IPR000014 (SMART); IPR036638 (G3DSA:4.10.280.GENE3D); G3DSA:3.30.450.20 (GENE3D); IPR013767 (PFAM); PF14598 (PFAM); G3DSA:3.30.450.20 (GENE3D); mobidb-lite (MOBIDB_LITE); mobidb-lite (MOBIDB_LITE); mobidb-lite (MOBIDB_LITE); mobidb-lite (MOBIDB_LITE); mobidb-lite (MOBIDB_LITE); mobidb-lite (MOBIDB_LITE); PTHR23043:SF17 (PANTHER); PTHR23043 (PANTHER); IPR0115…	F:GO:0003700; C:GO:0005634; C:GO:0005667; C:GO:0005737; P:GO:0006355; F:GO:0046983	F:DNA-binding transcription factor activity; C:nucleus; C:transcription factor complex; C:cytoplasm; P:regulation of transcription, DNA-templated; F:protein dimerization activity
SPF_FS5_contig_795	[INTERPRO, BLASTED, MAPPED, GO-SLIM]	Protein YIPF3	1445	15	2.42748e-72	70.44	1	C:GO:0005575	C:cellular_component			IPR006977 (PFAM); PTHR15627 (PANTHER); IPR026637 (PTHR15627:PANTHER)	C:GO:0016020	C:membrane
SPF_FS5_contig_796	[INTERPRO, BLASTED, MAPPED, GO-SLIM]	dihydropyrimidinase isoform X6	1442	15	0	80.48	2	C:GO:0005737; F:GO:0016810	C:cytoplasm; F:hydrolase activity, acting on carbon-nitrogen (but not peptide) bonds			G3DSA:3.20.20.140 (GENE3D); IPR006680 (PFAM); mobidb-lite (MOBIDB_LITE); mobidb-lite (MOBIDB_LITE); PTHR11647 (PANTHER); PTHR11647:SF50 (PANTHER); IPR032466 (SUPERFAMILY); IPR011059 (SUPERFAMILY)	F:GO:0016787; F:GO:0016810	F:hydrolase activity; F:hydrolase activity, acting on carbon-nitrogen (but not peptide) bonds
SPF_FS5_contig_797	[INTERPRO, BLASTED, MAPPED, GO-SLIM]	serine/threonine-protein kinase tousled-like 2 isoform X2	3723	15	0	86.91	3	P:GO:0006464; F:GO:0016301; F:GO:0043167	P:cellular protein modification process; F:kinase activity; F:ion binding			IPR000719 (SMART); IPR000719 (PFAM); G3DSA:1.10.510.10 (GENE3D); mobidb-lite (MOBIDB_LITE); mobidb-lite (MOBIDB_LITE); mobidb-lite (MOBIDB_LITE); mobidb-lite (MOBIDB_LITE); mobidb-lite (MOBIDB_LITE); mobidb-lite (MOBIDB_LITE); PTHR22974:SF23 (PANTHER); PTHR22974 (PANTHER); IPR000719 (PROSITE_PROFILES); cd13990 (CDD); IPR011009 (SUPERFAMILY)	F:GO:0004672; F:GO:0005524; P:GO:0006468	F:protein kinase activity; F:ATP binding; P:protein phosphorylation
SPF_FS5_contig_798	[INTERPRO, BLASTED, MAPPED, GO-SLIM]	far upstream element-binding protein 3	3018	15	2.05553e-98	59.15	2	F:GO:0003723; P:GO:0006355	F:RNA binding; P:regulation of transcription, DNA-templated			IPR004087 (SMART); IPR036612 (G3DSA:3.30.1370.GENE3D); IPR004088 (PFAM); IPR036612 (G3DSA:3.30.1370.GENE3D); IPR015096 (PFAM); IPR036612 (G3DSA:3.30.1370.GENE3D); IPR036612 (G3DSA:3.30.1370.GENE3D); mobidb-lite (MOBIDB_LITE); mobidb-lite (MOBIDB_LITE); mobidb-lite (MOBIDB_LITE); mobidb-lite (MOBIDB_LITE); mobidb-lite (MOBIDB_LITE); mobidb-lite (MOBIDB_LITE); mobidb-lite (MOBIDB_LITE); mobidb-lite…	F:GO:0003676; F:GO:0003723; P:GO:0006355	F:nucleic acid binding; F:RNA binding; P:regulation of transcription, DNA-templated
SPF_FS5_contig_799	[INTERPRO, BLASTED, MAPPED, GO-SLIM]	multidrug resistance protein 1-like isoform X1	2964	15	0	61.71	4	F:GO:0005524; C:GO:0016021; F:GO:0042626; P:GO:0055085	F:ATP binding; C:integral component of membrane; F:ATPase-coupled transmembrane transporter activity; P:transmembrane transport	EC:3.6.1.3; EC:3.6.1.15	Adenosinetriphosphatase; Nucleoside-triphosphate phosphatase	IPR003593 (SMART); IPR011527 (PFAM); G3DSA:3.40.50.300 (GENE3D); IPR036640 (G3DSA:1.20.1560.GENE3D); IPR036640 (G3DSA:1.20.1560.GENE3D); IPR036640 (G3DSA:1.20.1560.GENE3D); IPR003439 (PFAM); mobidb-lite (MOBIDB_LITE); mobidb-lite (MOBIDB_LITE); mobidb-lite (MOBIDB_LITE); mobidb-lite (MOBIDB_LITE); PTHR24221:SF415 (PANTHER); IPR039421 (PANTHER); PTHR24221:SF415 (PANTHER); IPR011527 (PROSITE_PROFIL…	F:GO:0005524; C:GO:0016021; F:GO:0016887; F:GO:0042626; P:GO:0055085	F:ATP binding; C:integral component of membrane; F:ATPase activity; F:ATPase-coupled transmembrane transporter activity; P:transmembrane transport
SPF_FS5_contig_800	[INTERPRO, BLASTED, MAPPED, GO-SLIM]	60S ribosomal protein L11	1172	15	1.15116e-108	94.45	10	P:GO:0000027; F:GO:0003735; P:GO:0006412; P:GO:0006915; C:GO:0022625; P:GO:0042541; P:GO:0042593; P:GO:0043009; P:GO:0045088; P:GO:0048821	P:ribosomal large subunit assembly; F:structural constituent of ribosome; P:translation; P:apoptotic process; C:cytosolic large ribosomal subunit; P:hemoglobin biosynthetic process; P:glucose homeostasis; P:chordate embryonic development; P:regulation of innate immune response; P:erythrocyte development			IPR022803 (G3DSA:3.30.1440.GENE3D); IPR031309 (PFAM); IPR031310 (PFAM); IPR002132 (PIRSF); PTHR11994:SF10 (PANTHER); IPR002132 (PANTHER); IPR022803 (SUPERFAMILY)	F:GO:0003735; C:GO:0005840; P:GO:0006412	F:structural constituent of ribosome; C:ribosome; P:translation
SPF_FS5_contig_801	[INTERPRO, BLASTED, MAPPED, GO-SLIM]	GTP-binding protein 2-like	2272	15	0	72.84	2	F:GO:0003924; F:GO:0043167	F:GTPase activity; F:ion binding	EC:3.6.1.15	Nucleoside-triphosphate phosphatase	G3DSA:2.40.30.10 (GENE3D); G3DSA:3.40.50.300 (GENE3D); IPR000795 (PFAM); PTHR43721:SF3 (PANTHER); PTHR43721 (PANTHER); IPR000795 (PROSITE_PROFILES); cd03708 (CDD); cd03694 (CDD); IPR035531 (CDD); IPR027417 (SUPERFAMILY); IPR009000 (SUPERFAMILY); IPR009001 (SUPERFAMILY)	F:GO:0003924; F:GO:0005525	F:GTPase activity; F:GTP binding
SPF_FS5_contig_802	[INTERPRO, BLASTED, MAPPED, GO-SLIM]	protein transport protein Sec61 subunit alpha	2048	15	0	95.01	6	F:GO:0005048; C:GO:0005784; P:GO:0006616; P:GO:0006620; F:GO:0008320; C:GO:0016021	F:signal sequence binding; C:Sec61 translocon complex; P:SRP-dependent cotranslational protein targeting to membrane, translocation; P:posttranslational protein targeting to endoplasmic reticulum membrane; F:protein transmembrane transporter activity; C:integral component of membrane			IPR002208 (TIGRFAM); IPR019561 (PFAM); IPR002208 (PFAM); IPR002208 (PIRSF); IPR023201 (G3DSA:1.10.3370.GENE3D); PTHR10906:SF10 (PANTHER); IPR002208 (PANTHER); IPR023201 (SUPERFAMILY)	P:GO:0015031; C:GO:0016020	P:protein transport; C:membrane
SPF_FS5_contig_803	[INTERPRO, BLASTED, MAPPED, GO-SLIM]	alkaline phosphatase family protein	348	15	8.45533e-16	73.81	2	F:GO:0003674; C:GO:0005575	F:molecular_function; C:cellular_component			IPR002591 (PFAM); IPR017849 (G3DSA:3.40.720.GENE3D); PTHR10151 (PANTHER); PTHR10151:SF70 (PANTHER); IPR017850 (SUPERFAMILY)	F:GO:0003824	F:catalytic activity
SPF_FS5_contig_804	[INTERPRO, BLASTED, MAPPED, GO-SLIM]	ectonucleotide pyrophosphatase/phosphodiesterase family member 5	1452	15	1.24709e-111	62	2	F:GO:0003674; C:GO:0005575	F:molecular_function; C:cellular_component			IPR002591 (PFAM); IPR017849 (G3DSA:3.40.720.GENE3D); G3DSA:3.30.1360.180 (GENE3D); PTHR10151 (PANTHER); cd16018 (CDD); IPR017850 (SUPERFAMILY)	F:GO:0003824	F:catalytic activity
SPF_FS5_contig_805	[INTERPRO, BLASTED, MAPPED, GO-SLIM]	ectonucleotide pyrophosphatase/phosphodiesterase family member 5	507	15	1.10619e-52	65.18	2	F:GO:0003674; C:GO:0005575	F:molecular_function; C:cellular_component			IPR002591 (PFAM); IPR017849 (G3DSA:3.40.720.GENE3D); PTHR10151:SF82 (PANTHER); PTHR10151 (PANTHER); cd16018 (CDD); IPR017850 (SUPERFAMILY)	F:GO:0003824	F:catalytic activity
SPF_FS5_contig_806	[INTERPRO, BLASTED, MAPPED, GO-SLIM]	glycoprotein 3-alpha-L-fucosyltransferase A-like	2692	15	7.53816e-51	48.69	3	P:GO:0006486; F:GO:0008417; C:GO:0016020	P:protein glycosylation; F:fucosyltransferase activity; C:membrane			IPR001503 (PFAM); IPR038577 (G3DSA:3.40.50.GENE3D); IPR031481 (PFAM); IPR001503 (PANTHER); PS51257 (PROSITE_PROFILES); SSF53756 (SUPERFAMILY)	P:GO:0006486; F:GO:0008417; C:GO:0016020	P:protein glycosylation; F:fucosyltransferase activity; C:membrane
SPF_FS5_contig_808	[INTERPRO, BLASTED, MAPPED, GO-SLIM]	cytochrome P450 2U1	801	15	1.24766e-52	55.99	4	F:GO:0005506; F:GO:0016705; F:GO:0020037; P:GO:0055114	F:iron ion binding; F:oxidoreductase activity, acting on paired donors, with incorporation or reduction of molecular oxygen; F:heme binding; P:oxidation-reduction process			IPR002401 (PRINTS); IPR036396 (G3DSA:1.10.630.GENE3D); IPR001128 (PFAM); PTHR24300 (PANTHER); PTHR24300:SF281 (PANTHER); IPR036396 (SUPERFAMILY)	F:GO:0005506; F:GO:0016705; F:GO:0020037; P:GO:0055114	F:iron ion binding; F:oxidoreductase activity, acting on paired donors, with incorporation or reduction of molecular oxygen; F:heme binding; P:oxidation-reduction process
SPF_FS5_contig_809	[INTERPRO, BLASTED, MAPPED, GO-SLIM]	cytochrome P450 2J2-like	1594	15	3.68449e-71	49.37	4	F:GO:0005506; F:GO:0016705; F:GO:0020037; P:GO:0055114	F:iron ion binding; F:oxidoreductase activity, acting on paired donors, with incorporation or reduction of molecular oxygen; F:heme binding; P:oxidation-reduction process			IPR001128 (PRINTS); IPR002401 (PRINTS); IPR036396 (G3DSA:1.10.630.GENE3D); IPR001128 (PFAM); IPR036396 (G3DSA:1.10.630.GENE3D); PTHR24300 (PANTHER); IPR036396 (SUPERFAMILY)	F:GO:0005506; F:GO:0016705; F:GO:0020037; P:GO:0055114	F:iron ion binding; F:oxidoreductase activity, acting on paired donors, with incorporation or reduction of molecular oxygen; F:heme binding; P:oxidation-reduction process
SPF_FS5_contig_811	[INTERPRO, BLASTED, MAPPED, GO-SLIM]	Bifunctional arginine demethylase and lysyl-hydroxylase JMJD6	1594	15	0	83.65	2	F:GO:0008168; P:GO:0016192	F:methyltransferase activity; P:vesicle-mediated transport			IPR003347 (SMART); G3DSA:1.20.1280.270 (GENE3D); IPR003347 (PFAM); G3DSA:2.60.120.650 (GENE3D); mobidb-lite (MOBIDB_LITE); mobidb-lite (MOBIDB_LITE); mobidb-lite (MOBIDB_LITE); mobidb-lite (MOBIDB_LITE); PTHR12480 (PANTHER); PTHR12480:SF5 (PANTHER); IPR003347 (PROSITE_PROFILES); SSF51197 (SUPERFAMILY)	no GO terms	no GO terms
SPF_FS5_contig_816	[INTERPRO, BLASTED, MAPPED, GO-SLIM]	solute carrier family 26 member 6-like	940	15	1.18258e-35	68.25	4	F:GO:0008271; P:GO:0008272; C:GO:0016021; P:GO:0055085	F:secondary active sulfate transmembrane transporter activity; P:sulfate transport; C:integral component of membrane; P:transmembrane transport			IPR011547 (PFAM); PTHR11814:SF185 (PANTHER); IPR001902 (PANTHER)	F:GO:0008271; P:GO:0008272; F:GO:0015116; C:GO:0016020; C:GO:0016021; P:GO:0055085	F:secondary active sulfate transmembrane transporter activity; P:sulfate transport; F:sulfate transmembrane transporter activity; C:membrane; C:integral component of membrane; P:transmembrane transport
SPF_FS5_contig_817	[INTERPRO, BLASTED, MAPPED, GO-SLIM]	solute carrier family 26 member 6 isoform X2	567	15	3.96002e-32	67.47	4	F:GO:0008271; P:GO:0008272; C:GO:0016021; P:GO:0055085	F:secondary active sulfate transmembrane transporter activity; P:sulfate transport; C:integral component of membrane; P:transmembrane transport			IPR011547 (PFAM); PTHR11814:SF185 (PANTHER); IPR001902 (PANTHER)	F:GO:0008271; P:GO:0008272; F:GO:0015116; C:GO:0016020; C:GO:0016021; P:GO:0055085	F:secondary active sulfate transmembrane transporter activity; P:sulfate transport; F:sulfate transmembrane transporter activity; C:membrane; C:integral component of membrane; P:transmembrane transport
SPF_FS5_contig_818	[INTERPRO, BLASTED, MAPPED, GO-SLIM]	ubiquitin-conjugating enzyme E2 N	1275	15	5.00354e-93	94.21	2	F:GO:0016874; F:GO:0043167	F:ligase activity; F:ion binding			SM00212 (SMART); IPR016135 (G3DSA:3.10.110.GENE3D); IPR000608 (PFAM); PTHR43902:SF5 (PANTHER); PTHR43902 (PANTHER); IPR000608 (PROSITE_PROFILES); IPR000608 (CDD); IPR016135 (SUPERFAMILY)	no GO terms	no GO terms
SPF_FS5_contig_819	[INTERPRO, BLASTED, MAPPED, GO-SLIM]	sodium/potassium-transporting ATPase subunit beta-like	1432	15	1.99009e-43	55.22	5	C:GO:0005890; P:GO:0006813; P:GO:0006814; P:GO:0034220; P:GO:0065007	C:sodium:potassium-exchanging ATPase complex; P:potassium ion transport; P:sodium ion transport; P:ion transmembrane transport; P:biological regulation			IPR000402 (PFAM); IPR038702 (G3DSA:2.60.40.GENE3D); PTHR11523:SF28 (PANTHER); IPR000402 (PANTHER)	C:GO:0005890; P:GO:0006813; P:GO:0006814	C:sodium:potassium-exchanging ATPase complex; P:potassium ion transport; P:sodium ion transport
SPF_FS5_contig_820	[INTERPRO, BLASTED, MAPPED, GO-SLIM]	sodium/potassium-transporting ATPase subunit alpha-like	3825	15	0	87.66	11	F:GO:0005391; F:GO:0005524; C:GO:0005623; P:GO:0006883; P:GO:0010248; C:GO:0016021; P:GO:0030007; P:GO:0036376; F:GO:0046872; P:GO:1902600; P:GO:1990573	F:sodium:potassium-exchanging ATPase activity; F:ATP binding; C:cell; P:cellular sodium ion homeostasis; P:establishment or maintenance of transmembrane electrochemical gradient; C:integral component of membrane; P:cellular potassium ion homeostasis; P:sodium ion export across plasma membrane; F:metal ion binding; P:proton transmembrane transport; P:potassium ion import across plasma membrane	EC:3.6.1.3; EC:3.6.3.12; EC:3.6.3.9; EC:3.6.1.15	Adenosinetriphosphatase; Acting on acid anhydrides; Acting on acid anhydrides; Nucleoside-triphosphate phosphatase	PR00119 (PRINTS); PR00121 (PRINTS); IPR004014 (SMART); IPR005775 (TIGRFAM); PF00702 (PFAM); IPR006068 (PFAM); IPR001757 (TIGRFAM); G3DSA:2.70.150.10 (GENE3D); PF00122 (PFAM); IPR023214 (G3DSA:3.40.50.GENE3D); G3DSA:1.20.1110.10 (GENE3D); IPR004014 (PFAM); IPR023299 (G3DSA:3.40.1110.GENE3D); PF13246 (PFAM),SFLDG00002 (SFLD),SFLDF00027 (SFLD); mobidb-lite (MOBIDB_LITE); PTHR43294 (PANTHER); PTHR432…	F:GO:0000166; F:GO:0005524; P:GO:0006813; F:GO:0008556; C:GO:0016021	F:nucleotide binding; F:ATP binding; P:potassium ion transport; F:potassium transmembrane transporter activity, phosphorylative mechanism; C:integral component of membrane
SPF_FS5_contig_821	[BLASTED, MAPPED, ANNOTATED]	membrane-spanning 4-domains subfamily A member 8	1623	15	9.93926e-13	48.31	1	C:GO:0016020	C:membrane
SPF_FS5_contig_827	[INTERPRO, BLASTED, MAPPED, GO-SLIM]	ly6/PLAUR domain-containing protein 1-like	782	15	4.46649e-10	46.49	2	C:GO:0005575; P:GO:0008150	C:cellular_component; P:biological_process			PTHR33562 (PANTHER); SSF57302 (SUPERFAMILY)	no GO terms	no GO terms
SPF_FS5_contig_830	[INTERPRO, BLASTED, MAPPED, GO-SLIM]	ATP-binding cassette sub-family A member 7-like isoform X1	1049	15	1.49834e-06	58.36	2	C:GO:0005575; F:GO:0016887	C:cellular_component; F:ATPase activity	EC:3.6.1.3; EC:3.6.1.15	Adenosinetriphosphatase; Nucleoside-triphosphate phosphatase	no IPS match	no IPS match	no IPS match
SPF_FS5_contig_832	[INTERPRO, BLASTED, MAPPED, GO-SLIM]	GTP-binding protein 1	2203	15	0	83.6	2	F:GO:0003924; F:GO:0043167	F:GTPase activity; F:ion binding	EC:3.6.1.15	Nucleoside-triphosphate phosphatase	G3DSA:2.40.30.10 (GENE3D); G3DSA:3.40.50.300 (GENE3D); IPR004161 (PFAM); IPR000795 (PFAM); mobidb-lite (MOBIDB_LITE); mobidb-lite (MOBIDB_LITE); PTHR43721 (PANTHER); IPR039263 (PTHR43721:PANTHER); IPR000795 (PROSITE_PROFILES); IPR035531 (CDD); cd03708 (CDD); cd03694 (CDD); IPR009001 (SUPERFAMILY); IPR009000 (SUPERFAMILY); IPR027417 (SUPERFAMILY)	F:GO:0003924; F:GO:0005525	F:GTPase activity; F:GTP binding
SPF_FS5_contig_833	[BLASTED, MAPPED, ANNOTATED]	E3 ubiquitin-protein ligase UBR4 isoform X2	15374	15	0	62.15	1	F:GO:0008270	F:zinc ion binding
SPF_FS5_contig_836	[INTERPRO, BLASTED, MAPPED, GO-SLIM]	cytochrome c oxidase subunit 1 (mitochondrion)	602	15	4.24339e-90	93.7	10	F:GO:0004129; C:GO:0005743; P:GO:0006119; P:GO:0009060; C:GO:0016021; F:GO:0020037; P:GO:0022900; C:GO:0045277; F:GO:0046872; P:GO:1902600	F:cytochrome-c oxidase activity; C:mitochondrial inner membrane; P:oxidative phosphorylation; P:aerobic respiration; C:integral component of membrane; F:heme binding; P:electron transport chain; C:respiratory chain complex IV; F:metal ion binding; P:proton transmembrane transport	EC:1.9.3.1	Cytochrome-c oxidase	IPR036927 (G3DSA:1.20.210.GENE3D); PTHR10422:SF18 (PANTHER); IPR000883 (PANTHER); IPR023616 (PROSITE_PROFILES); IPR036927 (SUPERFAMILY)	F:GO:0004129; P:GO:0009060; C:GO:0016021; F:GO:0020037; P:GO:0055114	F:cytochrome-c oxidase activity; P:aerobic respiration; C:integral component of membrane; F:heme binding; P:oxidation-reduction process
SPF_FS5_contig_837	[INTERPRO, BLASTED, MAPPED, GO-SLIM]	MOXD1 homolog 1	695	15	1.91381e-28	62.09	5	F:GO:0016715; F:GO:0016787; P:GO:0018958; P:GO:0055114; P:GO:1901564	F:oxidoreductase activity, acting on paired donors, with incorporation or reduction of molecular oxygen, reduced ascorbate as one donor, and incorporation of one atom of oxygen; F:hydrolase activity; P:phenol-containing compound metabolic process; P:oxidation-reduction process; P:organonitrogen compound metabolic process			IPR024548 (PFAM); IPR014784 (G3DSA:2.60.120.GENE3D); PTHR10157:SF23 (PANTHER); PTHR10157 (PANTHER); IPR008977 (SUPERFAMILY)	F:GO:0003824; F:GO:0016715; P:GO:0055114	F:catalytic activity; F:oxidoreductase activity, acting on paired donors, with incorporation or reduction of molecular oxygen, reduced ascorbate as one donor, and incorporation of one atom of oxygen; P:oxidation-reduction process
SPF_FS5_contig_838	[INTERPRO, BLASTED, MAPPED, GO-SLIM]	type-1 angiotensin II receptor-associated protein-like	1353	15	3.00726e-32	57.93	2	C:GO:0016020; P:GO:0038166	C:membrane; P:angiotensin-activated signaling pathway			IPR009436 (SMART); IPR009436 (PFAM); IPR009436 (PANTHER); IPR009436 (PRODOM)	P:GO:0038166	P:angiotensin-activated signaling pathway
SPF_FS5_contig_839	[INTERPRO, BLASTED, MAPPED, GO-SLIM]	aconitate hydratase, mitochondrial-like	486	15	1.17543e-87	86.8	4	C:GO:0005739; P:GO:0006091; F:GO:0016829; F:GO:0043167	C:mitochondrion; P:generation of precursor metabolites and energy; F:lyase activity; F:ion binding	EC:4.2.1.3	Aconitate hydratase	IPR015928 (G3DSA:3.20.19.GENE3D); IPR000573 (PFAM); PTHR43160:SF3 (PANTHER); PTHR43160 (PANTHER); SSF52016 (SUPERFAMILY)	no GO terms	no GO terms
SPF_FS5_contig_841	[INTERPRO, BLASTED, MAPPED, GO-SLIM]	glutathione S-transferase 4-like	472	15	3.82797e-28	74.46	2	F:GO:0005515; F:GO:0016740	F:protein binding; F:transferase activity			IPR004045 (PFAM); G3DSA:1.20.1050.130 (GENE3D),SFLDS00019 (SFLD); IPR040079 (PANTHER); PTHR11571:SF207 (PANTHER); IPR004045 (PROSITE_PROFILES); cd03039 (CDD); IPR036249 (SUPERFAMILY)	F:GO:0005515	F:protein binding
SPF_FS5_contig_842	[INTERPRO, BLASTED, MAPPED, GO-SLIM]	filamin-A-like isoform X1	4698	15	0	75.32	1	F:GO:0003779	F:actin binding			IPR001298 (SMART); IPR013783 (G3DSA:2.60.40.GENE3D); IPR013783 (G3DSA:2.60.40.GENE3D); IPR013783 (G3DSA:2.60.40.GENE3D); IPR013783 (G3DSA:2.60.40.GENE3D); IPR017868 (PFAM); IPR013783 (G3DSA:2.60.40.GENE3D); IPR013783 (G3DSA:2.60.40.GENE3D); IPR013783 (G3DSA:2.60.40.GENE3D); IPR013783 (G3DSA:2.60.40.GENE3D); IPR013783 (G3DSA:2.60.40.GENE3D); PTHR43998 (PANTHER); PTHR43998:SF2 (PANTHER); IPR017868 …	F:GO:0005515	F:protein binding
SPF_FS5_contig_843	[INTERPRO, BLASTED, MAPPED, GO-SLIM]	peptidyl-glycine alpha-amidating monooxygenase B-like	3958	15	0	57.83	6	F:GO:0005507; F:GO:0005515; P:GO:0006518; C:GO:0016020; F:GO:0016715; P:GO:0055114	F:copper ion binding; F:protein binding; P:peptide metabolic process; C:membrane; F:oxidoreductase activity, acting on paired donors, with incorporation or reduction of molecular oxygen, reduced ascorbate as one donor, and incorporation of one atom of oxygen; P:oxidation-reduction process			IPR000720 (PRINTS); IPR000323 (PFAM); IPR024548 (PFAM); IPR001258 (PFAM); IPR011042 (G3DSA:2.120.10.GENE3D); IPR036939 (G3DSA:2.60.120.GENE3D); IPR014784 (G3DSA:2.60.120.GENE3D); mobidb-lite (MOBIDB_LITE); mobidb-lite (MOBIDB_LITE); mobidb-lite (MOBIDB_LITE); mobidb-lite (MOBIDB_LITE); mobidb-lite (MOBIDB_LITE); mobidb-lite (MOBIDB_LITE); PTHR10680:SF14 (PANTHER); PTHR10680:SF14 (PANTHER); PTHR10…	F:GO:0003824; F:GO:0004497; F:GO:0005507; F:GO:0005515; P:GO:0006518; C:GO:0016020; F:GO:0016715; P:GO:0055114	F:catalytic activity; F:monooxygenase activity; F:copper ion binding; F:protein binding; P:peptide metabolic process; C:membrane; F:oxidoreductase activity, acting on paired donors, with incorporation or reduction of molecular oxygen, reduced ascorbate as one donor, and incorporation of one atom of oxygen; P:oxidation-reduction process
SPF_FS5_contig_845	[INTERPRO, BLASTED, MAPPED, GO-SLIM]	40S ribosomal protein S23	541	15	2.66673e-90	95.06	5	P:GO:0002181; F:GO:0003735; C:GO:0005791; C:GO:0022627; C:GO:0042788	P:cytoplasmic translation; F:structural constituent of ribosome; C:rough endoplasmic reticulum; C:cytosolic small ribosomal subunit; C:polysomal ribosome			G3DSA:2.40.50.140 (GENE3D); IPR006032 (PIRSF); IPR005680 (TIGRFAM); IPR006032 (PFAM); mobidb-lite (MOBIDB_LITE); mobidb-lite (MOBIDB_LITE); PTHR11652:SF14 (PANTHER); IPR006032 (PANTHER); IPR005680 (CDD); IPR012340 (SUPERFAMILY)	F:GO:0003735; C:GO:0005840; P:GO:0006412; C:GO:0015935	F:structural constituent of ribosome; C:ribosome; P:translation; C:small ribosomal subunit
SPF_FS5_contig_847	[INTERPRO, BLASTED, MAPPED, GO-SLIM]	deoxyuridine 5'-triphosphate nucleotidohydrolase-like	879	15	1.32563e-60	76.69	3	F:GO:0003674; P:GO:0034641; P:GO:0044281	F:molecular_function; P:cellular nitrogen compound metabolic process; P:small molecule metabolic process	EC:3.6.1.23; EC:3.6.1.19	dUTP diphosphatase; Acting on acid anhydrides	IPR008181 (TIGRFAM); IPR029054 (PFAM); IPR036157 (G3DSA:2.70.40.GENE3D); mobidb-lite (MOBIDB_LITE); mobidb-lite (MOBIDB_LITE); PTHR11241:SF6 (PANTHER); IPR008181 (PANTHER); IPR033704 (CDD); IPR036157 (SUPERFAMILY)	F:GO:0004170; P:GO:0046080	F:dUTP diphosphatase activity; P:dUTP metabolic process
SPF_FS5_contig_848	[INTERPRO, BLASTED, MAPPED, GO-SLIM]	omega-amidase NIT2	634	15	1.12502e-77	76.6	1	P:GO:0008150	P:biological_process			IPR003010 (PFAM); IPR036526 (G3DSA:3.60.110.GENE3D); PTHR23088:SF30 (PANTHER); PTHR23088 (PANTHER); IPR003010 (PROSITE_PROFILES); cd07572 (CDD); IPR036526 (SUPERFAMILY)	P:GO:0006807	P:nitrogen compound metabolic process
SPF_FS5_contig_849	[INTERPRO, BLASTED, MAPPED, GO-SLIM]	omega-amidase NIT2	667	15	1.42587e-36	82.52	6	C:GO:0005813; C:GO:0005829; P:GO:0006107; P:GO:0006528; P:GO:0006541; F:GO:0050152	C:centrosome; C:cytosol; P:oxaloacetate metabolic process; P:asparagine metabolic process; P:glutamine metabolic process; F:omega-amidase activity	EC:3.5.1.3	Omega-amidase	IPR036526 (G3DSA:3.60.110.GENE3D); IPR003010 (PFAM); PTHR23088 (PANTHER); PTHR23088:SF30 (PANTHER); IPR003010 (PROSITE_PROFILES); IPR036526 (SUPERFAMILY)	P:GO:0006807	P:nitrogen compound metabolic process
SPF_FS5_contig_850	[INTERPRO, BLASTED, MAPPED, GO-SLIM]	protein-L-isoaspartate O-methyltransferase domain-containing protein 2	2580	15	5.68122e-104	78.78	3	F:GO:0004719; C:GO:0005737; P:GO:0006479	F:protein-L-isoaspartate (D-aspartate) O-methyltransferase activity; C:cytoplasm; P:protein methylation	EC:2.1.1.77	Protein-L-isoaspartate(D-aspartate) O-methyltransferase	G3DSA:3.40.50.150 (GENE3D); PF01135 (PFAM); mobidb-lite (MOBIDB_LITE); mobidb-lite (MOBIDB_LITE); mobidb-lite (MOBIDB_LITE); mobidb-lite (MOBIDB_LITE); mobidb-lite (MOBIDB_LITE); mobidb-lite (MOBIDB_LITE); mobidb-lite (MOBIDB_LITE); IPR000682 (PANTHER); PTHR11579:SF2 (PANTHER); cd02440 (CDD); IPR029063 (SUPERFAMILY)	F:GO:0004719; P:GO:0006464	F:protein-L-isoaspartate (D-aspartate) O-methyltransferase activity; P:cellular protein modification process
SPF_FS5_contig_851	[INTERPRO, BLASTED, MAPPED, GO-SLIM]	60S ribosomal protein L13a	390	15	1.31925e-57	87.85	4	F:GO:0003729; F:GO:0003735; P:GO:0017148; C:GO:0022625	F:mRNA binding; F:structural constituent of ribosome; P:negative regulation of translation; C:cytosolic large ribosomal subunit			IPR005755 (TIGRFAM); IPR036899 (G3DSA:3.90.1180.GENE3D); IPR005822 (PFAM); IPR005822 (PIRSF); IPR005822 (PANTHER); IPR005755 (PTHR11545:PANTHER); IPR005822 (HAMAP); IPR005822 (CDD); IPR036899 (SUPERFAMILY)	F:GO:0003735; C:GO:0005840; P:GO:0006412; C:GO:0015934	F:structural constituent of ribosome; C:ribosome; P:translation; C:large ribosomal subunit
SPF_FS5_contig_852	[INTERPRO, BLASTED, MAPPED, GO-SLIM]	lactase-phlorizin hydrolase	1470	15	7.89852e-170	66.31	2	F:GO:0004553; P:GO:0005975	F:hydrolase activity, hydrolyzing O-glycosyl compounds; P:carbohydrate metabolic process			IPR001360 (PRINTS); G3DSA:3.20.20.80 (GENE3D); IPR001360 (PFAM); PTHR10353:SF38 (PANTHER); PTHR10353:SF38 (PANTHER); IPR001360 (PANTHER); IPR017853 (SUPERFAMILY)	F:GO:0004553; P:GO:0005975	F:hydrolase activity, hydrolyzing O-glycosyl compounds; P:carbohydrate metabolic process
SPF_FS5_contig_853	[INTERPRO, BLASTED, MAPPED, GO-SLIM]	60S ribosomal protein L10	801	15	5.58712e-124	89.24	5	P:GO:0000027; F:GO:0003735; P:GO:0006412; C:GO:0022625; C:GO:0043025	P:ribosomal large subunit assembly; F:structural constituent of ribosome; P:translation; C:cytosolic large ribosomal subunit; C:neuronal cell body			IPR001197 (PIRSF); IPR016180 (PFAM); IPR001197 (TIGRFAM); IPR036920 (G3DSA:3.90.1170.GENE3D); IPR001197 (PANTHER); IPR016180 (CDD); IPR036920 (SUPERFAMILY)	F:GO:0003735; C:GO:0005622; C:GO:0005840; P:GO:0006412	F:structural constituent of ribosome; C:intracellular; C:ribosome; P:translation
SPF_FS5_contig_857	[INTERPRO, BLASTED, MAPPED, GO-SLIM]	geraniol dehydrogenase 1 isoform X2	1336	15	3.39903e-88	63.52	1	F:GO:0016491	F:oxidoreductase activity			IPR020843 (SMART); IPR013149 (PFAM); G3DSA:3.90.180.10 (GENE3D); PTHR42683 (PANTHER); PTHR42683:SF7 (PANTHER); IPR011032 (SUPERFAMILY); IPR036291 (SUPERFAMILY)	F:GO:0016491; P:GO:0055114	F:oxidoreductase activity; P:oxidation-reduction process
SPF_FS5_contig_858	[INTERPRO, BLASTED, MAPPED, GO-SLIM]	cytochrome P450 3A6-like	2235	15	6.5039e-117	57.92	4	F:GO:0005506; F:GO:0016705; F:GO:0020037; P:GO:0055114	F:iron ion binding; F:oxidoreductase activity, acting on paired donors, with incorporation or reduction of molecular oxygen; F:heme binding; P:oxidation-reduction process			IPR002401 (PRINTS); IPR001128 (PRINTS); IPR036396 (G3DSA:1.10.630.GENE3D); IPR001128 (PFAM); PTHR24292 (PANTHER); IPR036396 (SUPERFAMILY)	F:GO:0005506; F:GO:0016705; F:GO:0020037; P:GO:0055114	F:iron ion binding; F:oxidoreductase activity, acting on paired donors, with incorporation or reduction of molecular oxygen; F:heme binding; P:oxidation-reduction process
SPF_FS5_contig_859	[INTERPRO, BLASTED, MAPPED, GO-SLIM]	ATP-dependent RNA helicase DDX3X isoform X5	3334	15	0	83.65	2	F:GO:0004386; F:GO:0043167	F:helicase activity; F:ion binding	EC:3.6.1.15	Nucleoside-triphosphate phosphatase	IPR001650 (SMART); IPR014001 (SMART); G3DSA:3.40.50.300 (GENE3D); IPR001650 (PFAM); G3DSA:3.40.50.300 (GENE3D); IPR011545 (PFAM); mobidb-lite (MOBIDB_LITE); PTHR24031:SF332 (PANTHER); PTHR24031 (PANTHER); IPR014001 (PROSITE_PROFILES); IPR014014 (PROSITE_PROFILES); IPR001650 (PROSITE_PROFILES); IPR001650 (CDD); cd00268 (CDD); IPR027417 (SUPERFAMILY)	F:GO:0003676; F:GO:0005524	F:nucleic acid binding; F:ATP binding
SPF_FS5_contig_860	[INTERPRO, BLASTED, MAPPED, GO-SLIM]	serine/arginine-rich splicing factor 1B	3070	15	1.0855e-74	82.45	4	P:GO:0000381; F:GO:0003723; C:GO:0016607; P:GO:0045292	P:regulation of alternative mRNA splicing, via spliceosome; F:RNA binding; C:nuclear speck; P:mRNA cis splicing, via spliceosome			IPR000504 (SMART); IPR012677 (G3DSA:3.30.70.GENE3D); IPR012677 (G3DSA:3.30.70.GENE3D); IPR000504 (PFAM); mobidb-lite (MOBIDB_LITE); mobidb-lite (MOBIDB_LITE); mobidb-lite (MOBIDB_LITE); mobidb-lite (MOBIDB_LITE); PTHR43933 (PANTHER); IPR000504 (PROSITE_PROFILES); IPR000504 (PROSITE_PROFILES); cd12601 (CDD); IPR034520 (CDD); IPR035979 (SUPERFAMILY)	F:GO:0003676; F:GO:0003723	F:nucleic acid binding; F:RNA binding
SPF_FS5_contig_861	[INTERPRO, BLASTED, MAPPED, GO-SLIM]	60S ribosomal protein L13a-like	553	15	1.48888e-68	78.84	4	F:GO:0003729; F:GO:0003735; P:GO:0017148; C:GO:0022625	F:mRNA binding; F:structural constituent of ribosome; P:negative regulation of translation; C:cytosolic large ribosomal subunit			IPR005822 (PIRSF); IPR005755 (TIGRFAM); IPR036899 (G3DSA:3.90.1180.GENE3D); IPR005755 (PTHR11545:PANTHER); IPR005822 (PANTHER); IPR036899 (SUPERFAMILY)	F:GO:0003735; C:GO:0005840; P:GO:0006412; C:GO:0015934	F:structural constituent of ribosome; C:ribosome; P:translation; C:large ribosomal subunit
SPF_FS5_contig_863	[INTERPRO, BLASTED, MAPPED, GO-SLIM]	lethal(2) giant larvae protein homolog 1-like	5035	15	0	64.21	3	F:GO:0003674; C:GO:0005737; P:GO:0007010	F:molecular_function; C:cytoplasm; P:cytoskeleton organization			IPR000664 (PRINTS); IPR001680 (SMART); IPR013577 (PFAM); IPR015943 (G3DSA:2.130.10.GENE3D); mobidb-lite (MOBIDB_LITE); mobidb-lite (MOBIDB_LITE); mobidb-lite (MOBIDB_LITE); mobidb-lite (MOBIDB_LITE); mobidb-lite (MOBIDB_LITE); mobidb-lite (MOBIDB_LITE); mobidb-lite (MOBIDB_LITE); PTHR10241 (PANTHER); PTHR10241:SF21 (PANTHER); IPR001680 (PROSITE_PROFILES); IPR036322 (SUPERFAMILY); IPR036322 (SUPER…	F:GO:0005515	F:protein binding
SPF_FS5_contig_871	[INTERPRO, BLASTED, MAPPED, GO-SLIM]	14-3-3 protein zeta isoform X1	2358	15	1.63206e-107	80.46	1	F:GO:0003674	F:molecular_function			IPR000308 (PRINTS); IPR023410 (SMART); IPR023410 (PFAM); IPR036815 (G3DSA:1.20.190.GENE3D); IPR000308 (PANTHER); PTHR18860:SF28 (PANTHER); IPR036815 (SUPERFAMILY)	F:GO:0019904	F:protein domain specific binding
SPF_FS5_contig_872	[INTERPRO, BLASTED, MAPPED, GO-SLIM]	EF-hand domain-containing family member C2-like	2816	15	0	74.69	1	F:GO:0043167	F:ion binding			IPR006602 (SMART); IPR010554 (PFAM); G3DSA:2.30.29.170 (GENE3D); G3DSA:1.10.238.10 (GENE3D); PTHR12086:SF11 (PANTHER); IPR040193 (PANTHER); IPR006602 (PROSITE_PROFILES); IPR006602 (PROSITE_PROFILES); IPR002048 (PROSITE_PROFILES); IPR006602 (PROSITE_PROFILES); IPR002048 (PROSITE_PROFILES); IPR002048 (PROSITE_PROFILES); IPR011992 (SUPERFAMILY)	F:GO:0005509	F:calcium ion binding
SPF_FS5_contig_873	[INTERPRO, BLASTED, MAPPED, GO-SLIM]	NEDD8-activating enzyme E1 regulatory subunit-like	1759	15	0	70.86	2	F:GO:0019781; P:GO:0045116	F:NEDD8 activating enzyme activity; P:protein neddylation			G3DSA:3.40.50.720 (GENE3D); IPR000594 (PFAM); IPR030667 (PIRSF); IPR030667 (PTHR10953:PANTHER); PTHR10953 (PANTHER); cd01493 (CDD); IPR035985 (SUPERFAMILY)	F:GO:0008641; F:GO:0019781; P:GO:0045116	F:ubiquitin-like modifier activating enzyme activity; F:NEDD8 activating enzyme activity; P:protein neddylation
SPF_FS5_contig_874	[INTERPRO, BLASTED, MAPPED, GO-SLIM]	nucleolysin TIAR-like isoform X1	3006	15	2.34353e-108	69.59	1	F:GO:0003723	F:RNA binding			IPR003954 (SMART); IPR000504 (SMART); IPR000504 (PFAM); IPR012677 (G3DSA:3.30.70.GENE3D); IPR012677 (G3DSA:3.30.70.GENE3D); IPR012677 (G3DSA:3.30.70.GENE3D); mobidb-lite (MOBIDB_LITE); PTHR44082 (PANTHER); IPR000504 (PROSITE_PROFILES); IPR000504 (PROSITE_PROFILES); IPR000504 (PROSITE_PROFILES); cd12353 (CDD); cd12352 (CDD); cd12354 (CDD); IPR035979 (SUPERFAMILY); IPR035979 (SUPERFAMILY); IPR03597…	F:GO:0003676	F:nucleic acid binding
SPF_FS5_contig_875	[INTERPRO, BLASTED, MAPPED, GO-SLIM]	phosphoenolpyruvate carboxykinase, cytosolic [GTP]	2461	15	0	81.09	17	F:GO:0000287; F:GO:0004613; F:GO:0005525; C:GO:0005829; P:GO:0006094; P:GO:0006107; P:GO:0006475; P:GO:0009617; F:GO:0016301; P:GO:0016310; F:GO:0030145; F:GO:0031406; P:GO:0032868; P:GO:0046327; P:GO:0051365; P:GO:0061402; P:GO:0071333	F:magnesium ion binding; F:phosphoenolpyruvate carboxykinase (GTP) activity; F:GTP binding; C:cytosol; P:gluconeogenesis; P:oxaloacetate metabolic process; P:internal protein amino acid acetylation; P:response to bacterium; F:kinase activity; P:phosphorylation; F:manganese ion binding; F:carboxylic acid binding; P:response to insulin; P:glycerol biosynthetic process from pyruvate; P:cellular resp…	EC:4.1.1.32	Phosphoenolpyruvate carboxykinase (GTP)	IPR035078 (PFAM); IPR035077 (PFAM); G3DSA:2.170.8.10 (GENE3D); IPR008210 (G3DSA:3.40.449.GENE3D); IPR008209 (PIRSF); IPR013035 (G3DSA:3.90.228.GENE3D); PTHR11561:SF11 (PANTHER); IPR008209 (PANTHER); IPR008209 (HAMAP); IPR008209 (CDD); SSF53795 (SUPERFAMILY); IPR008210 (SUPERFAMILY)	F:GO:0004611; F:GO:0005525; P:GO:0006094; F:GO:0017076	F:phosphoenolpyruvate carboxykinase activity; F:GTP binding; P:gluconeogenesis; F:purine nucleotide binding
SPF_FS5_contig_876	[INTERPRO, BLASTED, MAPPED, GO-SLIM]	E3 ubiquitin-protein ligase Bre1-like isoform X6	3389	15	0	72.11	2	F:GO:0004842; P:GO:0010390	F:ubiquitin-protein transferase activity; P:histone monoubiquitination			IPR001841 (SMART); IPR006829 (PFAM); PF13920 (PFAM); IPR013083 (G3DSA:3.30.40.GENE3D); mobidb-lite (MOBIDB_LITE); mobidb-lite (MOBIDB_LITE); mobidb-lite (MOBIDB_LITE); mobidb-lite (MOBIDB_LITE); IPR013956 (PANTHER); IPR013956 (PANTHER); PTHR23163:SF1 (PANTHER); IPR001841 (PROSITE_PROFILES); cd16704 (CDD); SSF57850 (SUPERFAMILY)	F:GO:0004842; P:GO:0010390	F:ubiquitin-protein transferase activity; P:histone monoubiquitination
SPF_FS5_contig_879	[INTERPRO, BLASTED, MAPPED, GO-SLIM]	peroxisomal membrane protein 11C isoform X1	2028	15	1.36702e-40	59.76	2	C:GO:0005779; P:GO:0016559	C:integral component of peroxisomal membrane; P:peroxisome fission			IPR008733 (PFAM); IPR026510 (PANTHER)	C:GO:0005779; P:GO:0016559	C:integral component of peroxisomal membrane; P:peroxisome fission
SPF_FS5_contig_881	[INTERPRO, BLASTED, MAPPED, GO-SLIM]	RNA-binding protein lark	1608	15	6.19092e-40	74.75	2	F:GO:0003723; F:GO:0008270	F:RNA binding; F:zinc ion binding			IPR001878 (SMART); IPR000504 (SMART); IPR000504 (PFAM); G3DSA:4.10.60.10 (GENE3D); IPR001878 (PFAM); IPR012677 (G3DSA:3.30.70.GENE3D); PTHR44266:SF3 (PANTHER); PTHR44266 (PANTHER); IPR000504 (PROSITE_PROFILES); IPR001878 (PROSITE_PROFILES); cd12343 (CDD); IPR035979 (SUPERFAMILY)	F:GO:0003676; F:GO:0008270	F:nucleic acid binding; F:zinc ion binding
SPF_FS5_contig_882	[INTERPRO, BLASTED, MAPPED, GO-SLIM]	myosin heavy chain	5472	15	0	82.66	4	F:GO:0003774; F:GO:0005524; C:GO:0016459; F:GO:0051015	F:motor activity; F:ATP binding; C:myosin complex; F:actin filament binding	EC:3.6.1.15	Nucleoside-triphosphate phosphatase	IPR001609 (PRINTS); IPR001609 (SMART); IPR000048 (SMART); IPR004009 (PFAM); G3DSA:1.20.5.340 (GENE3D); IPR002928 (PFAM); IPR001609 (PFAM); IPR027401 (G3DSA:4.10.270.GENE3D); G3DSA:1.20.58.530 (GENE3D); IPR036961 (G3DSA:3.40.850.GENE3D); G3DSA:1.20.5.370 (GENE3D); G3DSA:1.20.5.370 (GENE3D); IPR008989 (G3DSA:2.30.30.GENE3D); G3DSA:1.20.5.1050 (GENE3D); G3DSA:1.20.120.720 (GENE3D); G3DSA:3.30.70.324…	F:GO:0003774; F:GO:0005515; F:GO:0005524; C:GO:0016459; F:GO:0051015	F:motor activity; F:protein binding; F:ATP binding; C:myosin complex; F:actin filament binding
SPF_FS5_contig_883	[INTERPRO, BLASTED, MAPPED, GO-SLIM]	suppressor of tumorigenicity 14 protein homolog	1425	15	1.48578e-108	52.83	3	F:GO:0004252; F:GO:0005515; P:GO:0006508	F:serine-type endopeptidase activity; F:protein binding; P:proteolysis			IPR001314 (PRINTS); IPR002172 (SMART); IPR001254 (SMART); IPR000859 (SMART); G3DSA:4.10.400.10 (GENE3D); IPR035914 (G3DSA:2.60.120.GENE3D); IPR001254 (PFAM); G3DSA:2.40.10.10 (GENE3D); IPR002172 (PFAM); IPR000859 (PFAM); PTHR44049 (PANTHER); IPR000859 (PROSITE_PROFILES); IPR002172 (PROSITE_PROFILES); IPR001254 (PROSITE_PROFILES); IPR000859 (CDD); IPR001254 (CDD); IPR002172 (CDD); IPR009003 (SUPER…	F:GO:0004252; F:GO:0005515; P:GO:0006508	F:serine-type endopeptidase activity; F:protein binding; P:proteolysis
SPF_FS5_contig_886	[INTERPRO, BLASTED, MAPPED, GO-SLIM]	atlastin-2 isoform X1	1091	15	1.29683e-98	64.32	3	F:GO:0003924; C:GO:0005575; F:GO:0043167	F:GTPase activity; C:cellular_component; F:ion binding	EC:3.6.1.15	Nucleoside-triphosphate phosphatase	IPR015894 (PFAM); G3DSA:3.40.50.300 (GENE3D); PTHR10751 (PANTHER); PTHR10751:SF29 (PANTHER); IPR030386 (PROSITE_PROFILES); IPR027417 (SUPERFAMILY)	F:GO:0003924; F:GO:0005525	F:GTPase activity; F:GTP binding
SPF_FS5_contig_890	[INTERPRO, BLASTED, MAPPED, GO-SLIM]	ADP-ribosylarginine hydrolase	2106	15	5.96849e-112	70.93	7	F:GO:0000287; F:GO:0003875; F:GO:0005096; P:GO:0006886; F:GO:0017137; P:GO:0051725; P:GO:0090630	F:magnesium ion binding; F:ADP-ribosylarginine hydrolase activity; F:GTPase activator activity; P:intracellular protein transport; F:Rab GTPase binding; P:protein de-ADP-ribosylation; P:activation of GTPase activity	EC:3.2.2.19	[Protein ADP-ribosylarginine] hydrolase	IPR036705 (G3DSA:1.10.4080.GENE3D); IPR005502 (PFAM); IPR012108 (PIRSF); PTHR22957 (PANTHER); PTHR22957:SF294 (PANTHER); IPR036705 (SUPERFAMILY)	F:GO:0000287; F:GO:0003875; P:GO:0051725	F:magnesium ion binding; F:ADP-ribosylarginine hydrolase activity; P:protein de-ADP-ribosylation
SPF_FS5_contig_891	[INTERPRO, BLASTED, MAPPED, GO-SLIM]	unconventional myosin-Id	3770	15	0	74.81	4	F:GO:0003774; F:GO:0005515; F:GO:0005524; C:GO:0016459	F:motor activity; F:protein binding; F:ATP binding; C:myosin complex			IPR001609 (PRINTS); IPR001609 (SMART); IPR001609 (PFAM); IPR036961 (G3DSA:3.40.850.GENE3D); G3DSA:1.20.58.530 (GENE3D); IPR010926 (PFAM); G3DSA:1.10.10.820 (GENE3D); G3DSA:1.20.120.720 (GENE3D); G3DSA:3.30.70.3240 (GENE3D); PTHR13140 (PANTHER); PTHR13140:SF713 (PANTHER); IPR010926 (PROSITE_PROFILES); IPR000048 (PROSITE_PROFILES); IPR001609 (PROSITE_PROFILES); IPR036072 (CDD); IPR027417 (SUPERFAMI…	F:GO:0003774; F:GO:0005515; F:GO:0005524; C:GO:0016459	F:motor activity; F:protein binding; F:ATP binding; C:myosin complex
SPF_FS5_contig_893	[INTERPRO, BLASTED, MAPPED, GO-SLIM]	myosin heavy chain isoform A	4639	15	0	75.24	5	F:GO:0003774; F:GO:0003779; F:GO:0005524; C:GO:0005737; C:GO:0016459	F:motor activity; F:actin binding; F:ATP binding; C:cytoplasm; C:myosin complex			IPR001609 (SMART); IPR027401 (G3DSA:4.10.270.GENE3D); IPR001609 (PFAM); IPR036961 (G3DSA:3.40.850.GENE3D); IPR002928 (PFAM); G3DSA:3.30.70.1590 (GENE3D); G3DSA:1.20.5.370 (GENE3D); G3DSA:1.20.5.1050 (GENE3D); G3DSA:1.20.58.530 (GENE3D); mobidb-lite (MOBIDB_LITE); mobidb-lite (MOBIDB_LITE); mobidb-lite (MOBIDB_LITE); mobidb-lite (MOBIDB_LITE); mobidb-lite (MOBIDB_LITE); mobidb-lite (MOBIDB_LITE); …	F:GO:0003774; F:GO:0005515; F:GO:0005524; C:GO:0016459	F:motor activity; F:protein binding; F:ATP binding; C:myosin complex
SPF_FS5_contig_896	[INTERPRO, BLASTED, MAPPED, GO-SLIM]	histidine protein methyltransferase 1 homolog	1117	15	1.06555e-63	64.8	1	F:GO:0008168	F:methyltransferase activity			G3DSA:3.40.50.150 (GENE3D); IPR019410 (PFAM); PTHR14614 (PANTHER); PTHR14614:SF39 (PANTHER); cd02440 (CDD); IPR029063 (SUPERFAMILY)	no GO terms	no GO terms
SPF_FS5_contig_898	[INTERPRO, BLASTED, MAPPED, GO-SLIM]	receptor-interacting serine/threonine-protein kinase 3 isoform X1	1192	15	2.70837e-35	54.02	3	F:GO:0004672; F:GO:0005524; P:GO:0006468	F:protein kinase activity; F:ATP binding; P:protein phosphorylation			IPR000719 (SMART); G3DSA:1.10.510.10 (GENE3D); PIRSF000654 (PIRSF); IPR001245 (PFAM); PTHR45116 (PANTHER); IPR000719 (PROSITE_PROFILES); IPR011009 (SUPERFAMILY)	F:GO:0004672; F:GO:0005524; P:GO:0006468	F:protein kinase activity; F:ATP binding; P:protein phosphorylation
SPF_FS5_contig_899	[BLASTED, MAPPED, ANNOTATED]	EF-hand domain-containing protein D1	2545	15	1.11557e-86	47.61	1	C:GO:0016020	C:membrane
SPF_FS5_contig_900	[INTERPRO, BLASTED, MAPPED, GO-SLIM]	ribonucleoside-diphosphate reductase large subunit	2704	15	0	87.89	8	C:GO:0005829; P:GO:0009058; F:GO:0016491; C:GO:0032991; P:GO:0034641; F:GO:0043167; P:GO:0044281; P:GO:0065003	C:cytosol; P:biosynthetic process; F:oxidoreductase activity; C:protein-containing complex; P:cellular nitrogen compound metabolic process; F:ion binding; P:small molecule metabolic process; P:protein-containing complex assembly	EC:1.17.4; EC:1.17.4.1	Acting on CH or CH(2) groups; Ribonucleoside-diphosphate reductase	IPR000788 (PRINTS); IPR013346 (TIGRFAM); IPR000788 (PFAM); IPR005144 (PFAM); IPR013509 (PFAM); G3DSA:3.20.70.20 (GENE3D); mobidb-lite (MOBIDB_LITE); PTHR11573:SF6 (PANTHER); IPR039718 (PANTHER); IPR005144 (PROSITE_PROFILES); cd01679 (CDD); IPR008926 (SUPERFAMILY); SSF51998 (SUPERFAMILY)	F:GO:0004748; F:GO:0005524; P:GO:0006260; P:GO:0055114	F:ribonucleoside-diphosphate reductase activity, thioredoxin disulfide as acceptor; F:ATP binding; P:DNA replication; P:oxidation-reduction process
SPF_FS5_contig_904	[INTERPRO, BLASTED, MAPPED, GO-SLIM]	acid phosphatase type 7	1368	15	7.94879e-168	74.96	3	F:GO:0003993; C:GO:0016020; F:GO:0046872	F:acid phosphatase activity; C:membrane; F:metal ion binding			IPR004843 (PFAM); IPR008963 (G3DSA:2.60.40.GENE3D); IPR015914 (PFAM); IPR025733 (PFAM); IPR029052 (G3DSA:3.60.21.GENE3D); mobidb-lite (MOBIDB_LITE); PTHR22953:SF9 (PANTHER); IPR039331 (PANTHER); cd00839 (CDD); SSF56300 (SUPERFAMILY); IPR008963 (SUPERFAMILY)	F:GO:0003993; F:GO:0016787; F:GO:0046872	F:acid phosphatase activity; F:hydrolase activity; F:metal ion binding
SPF_FS5_contig_905	[INTERPRO, BLASTED, MAPPED, GO-SLIM]	ankyrin repeat domain-containing protein 12	6904	15	6.86124e-137	83.21	7	F:GO:0004674; F:GO:0005515; F:GO:0005524; C:GO:0005737; P:GO:0023014; P:GO:0031098; P:GO:0032147	F:protein serine/threonine kinase activity; F:protein binding; F:ATP binding; C:cytoplasm; P:signal transduction by protein phosphorylation; P:stress-activated protein kinase signaling cascade; P:activation of protein kinase activity	EC:2.7.11	Transferring phosphorus-containing groups	IPR000719 (SMART); IPR002110 (SMART); IPR036770 (G3DSA:1.25.40.GENE3D); IPR036770 (G3DSA:1.25.40.GENE3D); IPR000719 (PFAM); IPR036770 (G3DSA:1.25.40.GENE3D); IPR020683 (PFAM); G3DSA:3.30.200.20 (GENE3D); G3DSA:1.10.510.10 (GENE3D); PF13857 (PFAM); mobidb-lite (MOBIDB_LITE); mobidb-lite (MOBIDB_LITE); mobidb-lite (MOBIDB_LITE); mobidb-lite (MOBIDB_LITE); mobidb-lite (MOBIDB_LITE); mobidb-lite (MOB…	F:GO:0004672; F:GO:0005515; F:GO:0005524; P:GO:0006468	F:protein kinase activity; F:protein binding; F:ATP binding; P:protein phosphorylation
SPF_FS5_contig_906	[INTERPRO, BLASTED, MAPPED, GO-SLIM]	AChain A, Solution structure of the fourth CH domain from human L-plastin	1045	15	6.8694e-33	84.5	16	P:GO:0002376; C:GO:0005829; C:GO:0005856; C:GO:0005886; P:GO:0006810; P:GO:0006950; P:GO:0007010; P:GO:0007165; F:GO:0008092; F:GO:0019899; P:GO:0030198; C:GO:0032991; F:GO:0043167; P:GO:0048856; P:GO:0048870; P:GO:0065003	P:immune system process; C:cytosol; C:cytoskeleton; C:plasma membrane; P:transport; P:response to stress; P:cytoskeleton organization; P:signal transduction; F:cytoskeletal protein binding; F:enzyme binding; P:extracellular matrix organization; C:protein-containing complex; F:ion binding; P:anatomical structure development; P:cell motility; P:protein-containing complex assembly			no IPS match	no IPS match	no IPS match
SPF_FS5_contig_907	[INTERPRO, BLASTED, MAPPED, GO-SLIM]	gamma-aminobutyric acid receptor-associated protein	840	15	4.78881e-75	98.74	2	C:GO:0005737; P:GO:0006914	C:cytoplasm; P:autophagy			G3DSA:3.10.20.90 (GENE3D); IPR004241 (PFAM); PTHR10969:SF26 (PANTHER); IPR004241 (PANTHER); IPR004241 (CDD); IPR029071 (SUPERFAMILY)	no GO terms	no GO terms
SPF_FS5_contig_908	[INTERPRO, BLASTED, MAPPED, GO-SLIM]	TBC1 domain family member 10A-like	1994	15	5.45742e-140	74.7	6	C:GO:0005737; C:GO:0005886; P:GO:0016192; F:GO:0019899; P:GO:0022607; F:GO:0030234	C:cytoplasm; C:plasma membrane; P:vesicle-mediated transport; F:enzyme binding; P:cellular component assembly; F:enzyme regulator activity			IPR000195 (SMART); G3DSA:1.10.8.270 (GENE3D); G3DSA:1.10.10.750 (GENE3D); IPR000195 (PFAM); G3DSA:1.10.472.80 (GENE3D); mobidb-lite (MOBIDB_LITE); mobidb-lite (MOBIDB_LITE); mobidb-lite (MOBIDB_LITE); PTHR22957 (PANTHER); PTHR22957:SF215 (PANTHER); IPR000195 (PROSITE_PROFILES); IPR035969 (SUPERFAMILY); IPR035969 (SUPERFAMILY)	no GO terms	no GO terms
SPF_FS5_contig_910	[INTERPRO, BLASTED, MAPPED, GO-SLIM]	ribosomal protein rpl17	778	15	8.11513e-95	88.45	3	P:GO:0002181; F:GO:0003735; C:GO:0022625	P:cytoplasmic translation; F:structural constituent of ribosome; C:cytosolic large ribosomal subunit			IPR005721 (TIGRFAM); IPR001063 (PFAM); IPR036394 (G3DSA:3.90.470.GENE3D); mobidb-lite (MOBIDB_LITE); mobidb-lite (MOBIDB_LITE); mobidb-lite (MOBIDB_LITE); IPR005721 (PANTHER); IPR005721 (HAMAP); IPR001063 (CDD); IPR036394 (SUPERFAMILY)	F:GO:0003735; C:GO:0005840; P:GO:0006412; C:GO:0015934	F:structural constituent of ribosome; C:ribosome; P:translation; C:large ribosomal subunit
SPF_FS5_contig_911	[INTERPRO, BLASTED, MAPPED, GO-SLIM]	ubiquitin-like modifier-activating enzyme 1	10573	15	0	77.5	6	F:GO:0000166; F:GO:0004839; C:GO:0005634; C:GO:0005737; P:GO:0006974; P:GO:0016567	F:nucleotide binding; F:ubiquitin activating enzyme activity; C:nucleus; C:cytoplasm; P:cellular response to DNA damage stimulus; P:protein ubiquitination	EC:6.2.1.45	E1 ubiquitin-activating enzyme	IPR000011 (PRINTS); IPR018965 (SMART); G3DSA:3.50.50.80 (GENE3D); IPR032420 (PFAM); IPR038252 (G3DSA:3.10.290.GENE3D); G3DSA:3.40.50.720 (GENE3D); IPR018965 (PFAM); IPR032418 (PFAM); G3DSA:2.40.30.180 (GENE3D); IPR019572 (PFAM); IPR000594 (PFAM); G3DSA:3.40.50.12550 (GENE3D); G3DSA:1.10.10.2660 (GENE3D); IPR018075 (TIGRFAM); IPR000594 (PFAM); mobidb-lite (MOBIDB_LITE); mobidb-lite (MOBIDB_LITE); …	P:GO:0006464; F:GO:0008641	P:cellular protein modification process; F:ubiquitin-like modifier activating enzyme activity
SPF_FS5_contig_912	[INTERPRO, BLASTED, MAPPED, GO-SLIM]	Phosphatidylinositol 3-kinase catalytic subunit type 3	6261	15	0	66.61	8	P:GO:0006914; F:GO:0016303; C:GO:0035032; C:GO:0043227; C:GO:0043229; C:GO:0044444; P:GO:0046854; P:GO:0048015	P:autophagy; F:1-phosphatidylinositol-3-kinase activity; C:phosphatidylinositol 3-kinase complex, class III; C:membrane-bounded organelle; C:intracellular organelle; C:obsolete cytoplasmic part; P:phosphatidylinositol phosphorylation; P:phosphatidylinositol-mediated signaling			IPR002420 (SMART); IPR000403 (SMART); IPR001263 (SMART); IPR036940 (G3DSA:1.10.1070.GENE3D); G3DSA:1.25.40.70 (GENE3D); IPR000403 (PFAM); IPR035892 (G3DSA:2.60.40.GENE3D); G3DSA:3.30.1010.10 (GENE3D); IPR008290 (PIRSF); IPR001263 (PFAM); IPR002420 (PFAM); mobidb-lite (MOBIDB_LITE); mobidb-lite (MOBIDB_LITE); IPR015433 (PANTHER); PTHR10048:SF7 (PANTHER); IPR002420 (PROSITE_PROFILES); IPR001263 (PR…	F:GO:0016301; F:GO:0016303; P:GO:0046854; P:GO:0048015	F:kinase activity; F:1-phosphatidylinositol-3-kinase activity; P:phosphatidylinositol phosphorylation; P:phosphatidylinositol-mediated signaling
SPF_FS5_contig_913	[INTERPRO, BLASTED, MAPPED, GO-SLIM]	transcription factor CP2-like	2589	15	0	69.87	5	F:GO:0003677; F:GO:0003700; C:GO:0005634; P:GO:0009058; P:GO:0034641	F:DNA binding; F:DNA-binding transcription factor activity; C:nucleus; P:biosynthetic process; P:cellular nitrogen compound metabolic process			IPR007604 (PFAM); G3DSA:1.10.150.50 (GENE3D); IPR041418 (PFAM); mobidb-lite (MOBIDB_LITE); mobidb-lite (MOBIDB_LITE); mobidb-lite (MOBIDB_LITE); mobidb-lite (MOBIDB_LITE); PTHR11037:SF20 (PANTHER); IPR040167 (PANTHER); IPR013761 (SUPERFAMILY)	F:GO:0003700; P:GO:0006357	F:DNA-binding transcription factor activity; P:regulation of transcription by RNA polymerase II
SPF_FS5_contig_914	[INTERPRO, BLASTED, MAPPED, GO-SLIM]	adenosylhomocysteinase A	1577	15	0	89.29	5	F:GO:0003674; P:GO:0006520; P:GO:0006790; P:GO:0034655; P:GO:0051186	F:molecular_function; P:cellular amino acid metabolic process; P:sulfur compound metabolic process; P:nucleobase-containing compound catabolic process; P:cofactor metabolic process	EC:3.3.1.1	Adenosylhomocysteinase	IPR000043 (SMART); IPR015878 (SMART); IPR000043 (PFAM); G3DSA:3.40.50.720 (GENE3D); IPR015878 (PFAM); IPR000043 (PIRSF); G3DSA:3.40.50.1480 (GENE3D); IPR000043 (TIGRFAM); IPR000043 (PFAM); G3DSA:3.40.50.1480 (GENE3D); PTHR23420:SF0 (PANTHER); IPR000043 (PANTHER); IPR034373 (HAMAP); IPR000043 (CDD); SSF52283 (SUPERFAMILY); IPR036291 (SUPERFAMILY)	F:GO:0004013; P:GO:0019510; F:GO:0051287	F:adenosylhomocysteinase activity; P:S-adenosylhomocysteine catabolic process; F:NAD binding
SPF_FS5_contig_915	[INTERPRO, BLASTED, MAPPED, GO-SLIM]	DBH-like monooxygenase protein 1	1959	15	2.03217e-122	58.37	10	F:GO:0005507; C:GO:0012505; C:GO:0016020; F:GO:0016715; P:GO:0018958; C:GO:0043227; C:GO:0043229; C:GO:0044444; P:GO:0055114; P:GO:1901564	F:copper ion binding; C:endomembrane system; C:membrane; F:oxidoreductase activity, acting on paired donors, with incorporation or reduction of molecular oxygen, reduced ascorbate as one donor, and incorporation of one atom of oxygen; P:phenol-containing compound metabolic process; C:membrane-bounded organelle; C:intracellular organelle; C:obsolete cytoplasmic part; P:oxidation-reduction process;…			IPR028460 (PRINTS); IPR005018 (SMART); IPR024548 (PFAM); IPR014784 (G3DSA:2.60.120.GENE3D); IPR036939 (G3DSA:2.60.120.GENE3D); IPR000323 (PFAM); IPR005018 (PFAM); PTHR10157 (PANTHER); PTHR10157:SF23 (PANTHER); IPR005018 (PROSITE_PROFILES); cd09631 (CDD); IPR008977 (SUPERFAMILY); SSF49344 (SUPERFAMILY); IPR008977 (SUPERFAMILY)	F:GO:0003824; F:GO:0004497; F:GO:0005507; F:GO:0016715; P:GO:0055114	F:catalytic activity; F:monooxygenase activity; F:copper ion binding; F:oxidoreductase activity, acting on paired donors, with incorporation or reduction of molecular oxygen, reduced ascorbate as one donor, and incorporation of one atom of oxygen; P:oxidation-reduction process
SPF_FS5_contig_916	[INTERPRO, BLASTED, MAPPED, GO-SLIM]	DBH-like monooxygenase protein 1	1643	15	8.88184e-120	58.87	10	F:GO:0005507; C:GO:0012505; C:GO:0016020; F:GO:0016715; P:GO:0018958; C:GO:0043227; C:GO:0043229; C:GO:0044444; P:GO:0055114; P:GO:1901564	F:copper ion binding; C:endomembrane system; C:membrane; F:oxidoreductase activity, acting on paired donors, with incorporation or reduction of molecular oxygen, reduced ascorbate as one donor, and incorporation of one atom of oxygen; P:phenol-containing compound metabolic process; C:membrane-bounded organelle; C:intracellular organelle; C:obsolete cytoplasmic part; P:oxidation-reduction process;…			IPR028460 (PRINTS); IPR005018 (SMART); IPR014784 (G3DSA:2.60.120.GENE3D); IPR024548 (PFAM); IPR036939 (G3DSA:2.60.120.GENE3D); IPR000323 (PFAM); IPR038697 (G3DSA:2.60.40.GENE3D); IPR005018 (PFAM); PTHR10157 (PANTHER); PTHR10157:SF23 (PANTHER); IPR005018 (PROSITE_PROFILES); cd09631 (CDD); IPR008977 (SUPERFAMILY); SSF49344 (SUPERFAMILY); IPR008977 (SUPERFAMILY)	F:GO:0003824; F:GO:0004497; F:GO:0005507; F:GO:0016715; P:GO:0055114	F:catalytic activity; F:monooxygenase activity; F:copper ion binding; F:oxidoreductase activity, acting on paired donors, with incorporation or reduction of molecular oxygen, reduced ascorbate as one donor, and incorporation of one atom of oxygen; P:oxidation-reduction process
SPF_FS5_contig_917	[INTERPRO, BLASTED, MAPPED, GO-SLIM]	pre-mRNA-processing-splicing factor 8	7208	15	0	97.16	5	P:GO:0000398; C:GO:0005681; F:GO:0017070; F:GO:0030623; F:GO:0046983	P:mRNA splicing, via spliceosome; C:spliceosomal complex; F:U6 snRNA binding; F:U5 snRNA binding; F:protein dimerization activity			IPR000555 (SMART); IPR019581 (PFAM); IPR021983 (PFAM); G3DSA:3.90.1570.40 (GENE3D); G3DSA:3.40.140.10 (GENE3D); G3DSA:1.20.80.40 (GENE3D); IPR012984 (PFAM); IPR000555 (PFAM); G3DSA:1.20.58.1750 (GENE3D); G3DSA:3.30.420.230 (GENE3D); IPR012591 (PFAM); IPR019582 (PFAM); IPR019580 (PFAM); IPR012592 (PFAM); mobidb-lite (MOBIDB_LITE); mobidb-lite (MOBIDB_LITE); mobidb-lite (MOBIDB_LITE); IPR027652 (PA…	P:GO:0000398; F:GO:0003723; F:GO:0005515; C:GO:0005681; F:GO:0017070; F:GO:0030623	P:mRNA splicing, via spliceosome; F:RNA binding; F:protein binding; C:spliceosomal complex; F:U6 snRNA binding; F:U5 snRNA binding
SPF_FS5_contig_918	[INTERPRO, BLASTED, MAPPED, GO-SLIM]	60S ribosomal protein L3	1385	15	0	90	4	F:GO:0003735; C:GO:0005840; P:GO:0006412; P:GO:0031017	F:structural constituent of ribosome; C:ribosome; P:translation; P:exocrine pancreas development			G3DSA:3.30.1430.10 (GENE3D); G3DSA:4.10.960.10 (GENE3D); G3DSA:2.40.30.10 (GENE3D); IPR000597 (PFAM); PTHR11363 (PANTHER); PTHR11363:SF4 (PANTHER); IPR009000 (SUPERFAMILY)	F:GO:0003735; C:GO:0005622; C:GO:0005840; P:GO:0006412	F:structural constituent of ribosome; C:intracellular; C:ribosome; P:translation
SPF_FS5_contig_919	[BLASTED, MAPPED, ANNOTATED]	uncharacterized protein LOC106172419 isoform X1	3975	15	1.92658e-32	56.42	4	F:GO:0004096; F:GO:0020037; P:GO:0055114; P:GO:0098869	F:catalase activity; F:heme binding; P:oxidation-reduction process; P:cellular oxidant detoxification	EC:1.11.1.7; EC:1.11.1.6	Peroxidase; Catalase
SPF_FS5_contig_920	[INTERPRO, BLASTED, MAPPED, GO-SLIM]	forkhead box protein O-like	3799	15	1.01506e-82	63.99	5	F:GO:0003677; F:GO:0003700; C:GO:0005634; P:GO:0009058; P:GO:0034641	F:DNA binding; F:DNA-binding transcription factor activity; C:nucleus; P:biosynthetic process; P:cellular nitrogen compound metabolic process			IPR001766 (PRINTS); IPR001766 (SMART); IPR001766 (PFAM); IPR036388 (G3DSA:1.10.10.GENE3D); IPR032067 (PFAM); mobidb-lite (MOBIDB_LITE); mobidb-lite (MOBIDB_LITE); mobidb-lite (MOBIDB_LITE); mobidb-lite (MOBIDB_LITE); mobidb-lite (MOBIDB_LITE); mobidb-lite (MOBIDB_LITE); mobidb-lite (MOBIDB_LITE); mobidb-lite (MOBIDB_LITE); mobidb-lite (MOBIDB_LITE); mobidb-lite (MOBIDB_LITE); mobidb-lite (MOBIDB_…	F:GO:0003700; P:GO:0006355; F:GO:0043565	F:DNA-binding transcription factor activity; P:regulation of transcription, DNA-templated; F:sequence-specific DNA binding
SPF_FS5_contig_922	[INTERPRO, BLASTED, MAPPED, GO-SLIM]	Dolichyl-diphosphooligosaccharide--protein glycosyltransferase 48 kDa subunit	1445	15	0	80.39	4	F:GO:0004579; C:GO:0008250; C:GO:0016021; P:GO:0018279	F:dolichyl-diphosphooligosaccharide-protein glycotransferase activity; C:oligosaccharyltransferase complex; C:integral component of membrane; P:protein N-linked glycosylation via asparagine	EC:2.4.1.119	Glycosyltransferases	IPR005013 (PFAM); IPR005013 (PANTHER)	C:GO:0005789; P:GO:0018279	C:endoplasmic reticulum membrane; P:protein N-linked glycosylation via asparagine
SPF_FS5_contig_923	[INTERPRO, BLASTED, MAPPED, GO-SLIM]	alpha-actinin, sarcomeric-like isoform X2	3319	15	0	87.88	2	F:GO:0003779; F:GO:0005509	F:actin binding; F:calcium ion binding			IPR018159 (SMART); SM01184 (SMART); IPR002048 (SMART); IPR001715 (SMART); G3DSA:1.20.58.60 (GENE3D); IPR014837 (PFAM); G3DSA:1.20.58.60 (GENE3D); G3DSA:1.10.238.10 (GENE3D); IPR036872 (G3DSA:1.10.418.GENE3D); IPR002017 (PFAM); G3DSA:1.20.58.60 (GENE3D); G3DSA:1.20.58.60 (GENE3D); G3DSA:1.10.238.10 (GENE3D); IPR001715 (PFAM); IPR036872 (G3DSA:1.10.418.GENE3D); PTHR43947 (PANTHER); PTHR43947:SF1 (P…	F:GO:0005509; F:GO:0005515	F:calcium ion binding; F:protein binding
SPF_FS5_contig_924	[INTERPRO, BLASTED, MAPPED, GO-SLIM]	microtubule-actin cross-linking factor 1-like isoform X3	6008	15	0	56.14	2	F:GO:0005509; F:GO:0008092	F:calcium ion binding; F:cytoskeletal protein binding			IPR018159 (SMART); IPR002017 (PFAM); G3DSA:1.20.58.60 (GENE3D); G3DSA:1.20.58.1940 (GENE3D); G3DSA:1.20.58.60 (GENE3D); mobidb-lite (MOBIDB_LITE); mobidb-lite (MOBIDB_LITE); PTHR44318 (PANTHER); IPR002048 (PROSITE_PROFILES); cd00176 (CDD); cd00176 (CDD); cd00176 (CDD); cd00176 (CDD); cd00176 (CDD); cd00176 (CDD); SSF46966 (SUPERFAMILY); SSF46966 (SUPERFAMILY); SSF46966 (SUPERFAMILY); SSF46966 (SU…	F:GO:0005509; F:GO:0005515	F:calcium ion binding; F:protein binding
SPF_FS5_contig_925	[INTERPRO, BLASTED, MAPPED, GO-SLIM]	microtubule-actin cross-linking factor 1, isoforms 1/2/3/5-like	447	15	3.05048e-62	83.27	7	F:GO:0005198; C:GO:0005737; C:GO:0005856; P:GO:0006950; P:GO:0007010; F:GO:0008092; F:GO:0043167	F:structural molecule activity; C:cytoplasm; C:cytoskeleton; P:response to stress; P:cytoskeleton organization; F:cytoskeletal protein binding; F:ion binding			IPR003108 (SMART); G3DSA:1.10.238.10 (GENE3D); IPR003108 (PFAM); IPR002048 (PFAM); IPR036534 (G3DSA:3.30.920.GENE3D); PTHR44350 (PANTHER); PTHR44350:SF1 (PANTHER); IPR003108 (PROSITE_PROFILES); IPR002048 (PROSITE_PROFILES); IPR002048 (PROSITE_PROFILES); IPR002048 (CDD); IPR011992 (SUPERFAMILY); IPR036534 (SUPERFAMILY)	F:GO:0005509; F:GO:0008017	F:calcium ion binding; F:microtubule binding
SPF_FS5_contig_927	[INTERPRO, BLASTED, MAPPED, GO-SLIM]	ER membrane protein complex subunit 1-like isoform X2	3388	15	0	55.16	2	F:GO:0005515; C:GO:0072546	F:protein binding; C:ER membrane protein complex			IPR015943 (G3DSA:2.130.10.GENE3D); IPR011678 (PFAM); IPR002372 (PFAM); IPR026895 (PANTHER); IPR011047 (SUPERFAMILY)	F:GO:0005515; C:GO:0072546	F:protein binding; C:ER membrane protein complex
SPF_FS5_contig_928	[BLASTED, MAPPED, ANNOTATED]	MAM and LDL-receptor class A domain-containing protein 1	395	15	3.61905e-13	57.98	1	C:GO:0016020	C:membrane
SPF_FS5_contig_931	[BLASTED, MAPPED, ANNOTATED]	retrovirus-related pol polyprotein from transposon tnt 1-94	2510	15	6.07037e-126	52.05	2	F:GO:0005488; P:GO:0006259	F:binding; P:DNA metabolic process
SPF_FS5_contig_932	[INTERPRO, BLASTED, MAPPED, GO-SLIM]	epsin-2 isoform X2	2989	15	1.42409e-94	73.92	3	P:GO:0016192; C:GO:0031410; C:GO:0032991	P:vesicle-mediated transport; C:cytoplasmic vesicle; C:protein-containing complex			IPR013809 (SMART); IPR003903 (SMART); IPR013809 (PFAM); IPR008942 (G3DSA:1.25.40.GENE3D); mobidb-lite (MOBIDB_LITE); mobidb-lite (MOBIDB_LITE); mobidb-lite (MOBIDB_LITE); mobidb-lite (MOBIDB_LITE); mobidb-lite (MOBIDB_LITE); mobidb-lite (MOBIDB_LITE); mobidb-lite (MOBIDB_LITE); PTHR12276 (PANTHER); IPR027319 (PTHR12276:PANTHER); IPR013809 (PROSITE_PROFILES); IPR003903 (PROSITE_PROFILES); IPR03941…	P:GO:0006897; C:GO:0030128	P:endocytosis; C:clathrin coat of endocytic vesicle
SPF_FS5_contig_935	[INTERPRO, BLASTED, MAPPED, GO-SLIM]	cyclin-related protein FAM58A-like	4588	15	6.06602e-58	68.96	4	C:GO:0005634; P:GO:0009058; F:GO:0030234; P:GO:0034641	C:nucleus; P:biosynthetic process; F:enzyme regulator activity; P:cellular nitrogen compound metabolic process			IPR013763 (SMART); G3DSA:1.10.472.10 (GENE3D); IPR006671 (PFAM); G3DSA:1.10.472.10 (GENE3D); PTHR10026 (PANTHER); IPR028759 (PTHR10026:PANTHER); IPR013763 (CDD); IPR036915 (SUPERFAMILY); IPR036915 (SUPERFAMILY)	no GO terms	no GO terms
SPF_FS5_contig_936	[INTERPRO, BLASTED, MAPPED, GO-SLIM]	carnitine O-palmitoyltransferase 1, liver isoform isoform X2	2578	15	0	72.1	4	C:GO:0016020; F:GO:0016747; P:GO:0044237; P:GO:0071704	C:membrane; F:transferase activity, transferring acyl groups other than amino-acyl groups; P:cellular metabolic process; P:organic substance metabolic process			G3DSA:3.30.559.70 (GENE3D); G3DSA:3.30.559.40 (GENE3D); IPR039551 (PFAM); IPR032476 (PFAM); IPR000542 (PANTHER); PTHR22589:SF69 (PANTHER); SSF52777 (SUPERFAMILY); SSF52777 (SUPERFAMILY)	F:GO:0016746	F:transferase activity, transferring acyl groups
SPF_FS5_contig_937	[INTERPRO, BLASTED, MAPPED, GO-SLIM]	dolichyl-phosphate beta-glucosyltransferase-like	1888	15	6.49846e-132	75.76	3	C:GO:0005783; P:GO:0006464; P:GO:0009058	C:endoplasmic reticulum; P:cellular protein modification process; P:biosynthetic process			IPR029044 (G3DSA:3.90.550.GENE3D); IPR001173 (PFAM); PTHR10859 (PANTHER); PTHR10859:SF91 (PANTHER); IPR035518 (CDD); IPR029044 (SUPERFAMILY)	no GO terms	no GO terms
SPF_FS5_contig_938	[INTERPRO, BLASTED, MAPPED, GO-SLIM]	syntenin-1-like	1793	15	6.48108e-119	74.7	6	F:GO:0005515; C:GO:0005737; C:GO:0005886; P:GO:0007268; P:GO:0030036; P:GO:0035556	F:protein binding; C:cytoplasm; C:plasma membrane; P:chemical synaptic transmission; P:actin cytoskeleton organization; P:intracellular signal transduction			IPR001478 (SMART); G3DSA:2.30.42.10 (GENE3D); G3DSA:2.30.42.10 (GENE3D); IPR041489 (PFAM); IPR030528 (PTHR12345:PANTHER); PTHR12345 (PANTHER); IPR001478 (PROSITE_PROFILES); IPR001478 (PROSITE_PROFILES); cd00992 (CDD); cd00992 (CDD); IPR036034 (SUPERFAMILY); IPR036034 (SUPERFAMILY)	F:GO:0005515; P:GO:0007268; P:GO:0030036; P:GO:0035556	F:protein binding; P:chemical synaptic transmission; P:actin cytoskeleton organization; P:intracellular signal transduction
SPF_FS5_contig_939	[INTERPRO, BLASTED, MAPPED, GO-SLIM]	Apoptosis-inducing factor 1	1393	15	1.41832e-114	78.93	3	C:GO:0005575; F:GO:0016491; F:GO:0043167	C:cellular_component; F:oxidoreductase activity; F:ion binding			PR00411 (PRINTS); PR00368 (PRINTS); IPR036188 (G3DSA:3.50.50.GENE3D); IPR036188 (G3DSA:3.50.50.GENE3D); IPR023753 (PFAM); mobidb-lite (MOBIDB_LITE); mobidb-lite (MOBIDB_LITE); mobidb-lite (MOBIDB_LITE); PTHR43557:SF4 (PANTHER); PTHR43557 (PANTHER); IPR036188 (SUPERFAMILY); IPR036188 (SUPERFAMILY)	F:GO:0016491; P:GO:0055114	F:oxidoreductase activity; P:oxidation-reduction process
SPF_FS5_contig_945	[INTERPRO, BLASTED, MAPPED, GO-SLIM]	major facilitator superfamily domain-containing protein 1-like	2290	15	0	79.33	2	C:GO:0005575; P:GO:0055085	C:cellular_component; P:transmembrane transport			G3DSA:1.20.1250.20 (GENE3D); IPR011701 (PFAM); PTHR23512 (PANTHER); PTHR23512:SF3 (PANTHER); IPR020846 (PROSITE_PROFILES); IPR020846 (CDD); IPR036259 (SUPERFAMILY)	C:GO:0016021; P:GO:0055085	C:integral component of membrane; P:transmembrane transport
SPF_FS5_contig_946	[INTERPRO, BLASTED, MAPPED, GO-SLIM]	LOW QUALITY PROTEIN: uncharacterized protein LOC111133782	2191	15	0	68.95	4	F:GO:0003700; P:GO:0009058; P:GO:0034641; P:GO:0044281	F:DNA-binding transcription factor activity; P:biosynthetic process; P:cellular nitrogen compound metabolic process; P:small molecule metabolic process			PTHR21234 (PANTHER); PTHR21234:SF16 (PANTHER); IPR035994 (SUPERFAMILY)	F:GO:0003824; P:GO:0009116	F:catalytic activity; P:nucleoside metabolic process
SPF_FS5_contig_947	[INTERPRO, BLASTED, MAPPED, GO-SLIM]	solute carrier family 35 member E3	1682	15	3.04098e-116	76.18	2	C:GO:0005794; F:GO:0022857	C:Golgi apparatus; F:transmembrane transporter activity			IPR004853 (PFAM); PTHR44276 (PANTHER)	no GO terms	no GO terms
SPF_FS5_contig_948	[INTERPRO, BLASTED, MAPPED, GO-SLIM]	estrogen sulfotransferase	1563	15	2.1936e-49	56.48	3	F:GO:0008146; P:GO:0044237; P:GO:0071704	F:sulfotransferase activity; P:cellular metabolic process; P:organic substance metabolic process			IPR000863 (PFAM); G3DSA:3.40.50.300 (GENE3D); PTHR11783 (PANTHER); IPR027417 (SUPERFAMILY)	F:GO:0008146	F:sulfotransferase activity
SPF_FS5_contig_949	[INTERPRO, BLASTED, MAPPED, GO-SLIM]	ras-related and estrogen-regulated growth inhibitor isoform X1	1548	15	6.57813e-53	65.37	10	F:GO:0003924; F:GO:0005525; C:GO:0005634; C:GO:0005829; P:GO:0007165; P:GO:0008285; P:GO:0009725; C:GO:0016020; F:GO:0019003; P:GO:0030308	F:GTPase activity; F:GTP binding; C:nucleus; C:cytosol; P:signal transduction; P:negative regulation of cell population proliferation; P:response to hormone; C:membrane; F:GDP binding; P:negative regulation of cell growth	EC:3.6.1.15	Nucleoside-triphosphate phosphatase	PR00449 (PRINTS); SM00173 (SMART); SM00174 (SMART); SM00175 (SMART); IPR001806 (PFAM); IPR005225 (TIGRFAM); G3DSA:3.40.50.300 (GENE3D); IPR020849 (PANTHER); PTHR24070:SF373 (PANTHER); IPR020849 (PROSITE_PROFILES); IPR027417 (SUPERFAMILY)	F:GO:0003924; F:GO:0005525; P:GO:0007165; C:GO:0016020	F:GTPase activity; F:GTP binding; P:signal transduction; C:membrane
SPF_FS5_contig_950	[BLASTED, MAPPED, ANNOTATED]	collagen-like surface protein	4330	15	4.83837e-30	56.06	1	C:GO:0016020	C:membrane
SPF_FS5_contig_951	[INTERPRO, BLASTED, MAPPED, GO-SLIM]	chorion peroxidase-like	2081	15	8.47672e-103	57.62	4	F:GO:0004601; P:GO:0006979; F:GO:0020037; P:GO:0055114	F:peroxidase activity; P:response to oxidative stress; F:heme binding; P:oxidation-reduction process			IPR019791 (PRINTS); IPR019791 (PFAM); IPR037120 (G3DSA:1.10.640.GENE3D); PTHR11475 (PANTHER); PTHR11475:SF107 (PANTHER); IPR019791 (PROSITE_PROFILES); IPR010255 (SUPERFAMILY)	F:GO:0004601; P:GO:0006979; F:GO:0020037; P:GO:0055114	F:peroxidase activity; P:response to oxidative stress; F:heme binding; P:oxidation-reduction process
SPF_FS5_contig_952	[INTERPRO, BLASTED, MAPPED, GO-SLIM]	eukaryotic translation initiation factor 5A	904	15	5.96761e-74	85.6	9	F:GO:0003743; F:GO:0003746; P:GO:0006413; P:GO:0006452; P:GO:0032504; P:GO:0042981; F:GO:0043022; P:GO:0045901; P:GO:0045905	F:translation initiation factor activity; F:translation elongation factor activity; P:translational initiation; P:translational frameshifting; P:multicellular organism reproduction; P:regulation of apoptotic process; F:ribosome binding; P:positive regulation of translational elongation; P:positive regulation of translational termination			IPR020189 (SMART); IPR014722 (G3DSA:2.30.30.GENE3D); IPR020189 (PFAM); IPR001884 (PIRSF); G3DSA:2.40.50.140 (GENE3D); IPR001884 (TIGRFAM); IPR001884 (PANTHER); cd04468 (CDD); IPR012340 (SUPERFAMILY); IPR008991 (SUPERFAMILY)	F:GO:0003723; F:GO:0003746; P:GO:0006452; F:GO:0043022; P:GO:0045901; P:GO:0045905	F:RNA binding; F:translation elongation factor activity; P:translational frameshifting; F:ribosome binding; P:positive regulation of translational elongation; P:positive regulation of translational termination
SPF_FS5_contig_953	[INTERPRO, BLASTED, MAPPED, GO-SLIM]	Cathepsin L	630	15	1.04106e-62	86.14	1	F:GO:0008233	F:peptidase activity			IPR000668 (SMART); G3DSA:3.90.70.10 (GENE3D); IPR000668 (PFAM); G3DSA:2.40.50.170 (GENE3D); IPR013128 (PANTHER); PTHR12411:SF57 (PANTHER); IPR039417 (CDD); IPR038765 (SUPERFAMILY)	P:GO:0006508; F:GO:0008234	P:proteolysis; F:cysteine-type peptidase activity
SPF_FS5_contig_954	[INTERPRO, BLASTED, MAPPED, GO-SLIM]	carboxypeptidase B-like	1596	15	3.26914e-127	59.03	6	F:GO:0004181; C:GO:0005576; P:GO:0006030; P:GO:0006508; F:GO:0008061; F:GO:0008270	F:metallocarboxypeptidase activity; C:extracellular region; P:chitin metabolic process; P:proteolysis; F:chitin binding; F:zinc ion binding	EC:3.4.17	Acting on peptide bonds (peptidases)	IPR000834 (PRINTS); IPR000834 (SMART); IPR003146 (PFAM); G3DSA:3.40.630.10 (GENE3D); IPR036990 (G3DSA:3.30.70.GENE3D); IPR000834 (PFAM); PTHR11705 (PANTHER); IPR034223 (CDD); SSF54897 (SUPERFAMILY); SSF53187 (SUPERFAMILY)	F:GO:0004180; F:GO:0004181; P:GO:0006508; F:GO:0008270	F:carboxypeptidase activity; F:metallocarboxypeptidase activity; P:proteolysis; F:zinc ion binding
SPF_FS5_contig_955	[INTERPRO, BLASTED, MAPPED, GO-SLIM]	DNA-binding protein D-ETS-4	2188	15	1.8304e-51	54.92	5	F:GO:0000981; C:GO:0005634; P:GO:0006357; P:GO:0030154; F:GO:0043565	F:DNA-binding transcription factor activity, RNA polymerase II-specific; C:nucleus; P:regulation of transcription by RNA polymerase II; P:cell differentiation; F:sequence-specific DNA binding			IPR000418 (PRINTS); IPR003118 (SMART); IPR000418 (SMART); IPR036388 (G3DSA:1.10.10.GENE3D); IPR000418 (PFAM); IPR003118 (PFAM); G3DSA:1.10.150.50 (GENE3D); PTHR11849:SF182 (PANTHER); PTHR11849 (PANTHER); IPR000418 (PROSITE_PROFILES); IPR003118 (PROSITE_PROFILES); IPR036390 (SUPERFAMILY); IPR013761 (SUPERFAMILY)	F:GO:0003700; C:GO:0005634; P:GO:0006355; F:GO:0043565	F:DNA-binding transcription factor activity; C:nucleus; P:regulation of transcription, DNA-templated; F:sequence-specific DNA binding
SPF_FS5_contig_956	[INTERPRO, BLASTED, MAPPED, GO-SLIM]	alpha-N-acetylgalactosaminidase isoform X1	1246	15	1.8815e-123	68.04	3	F:GO:0004553; P:GO:0005975; P:GO:1901136	F:hydrolase activity, hydrolyzing O-glycosyl compounds; P:carbohydrate metabolic process; P:carbohydrate derivative catabolic process			IPR002241 (PRINTS); IPR013780 (G3DSA:2.60.40.GENE3D); IPR013785 (G3DSA:3.20.20.GENE3D); IPR002241 (PFAM); IPR035373 (PFAM); PTHR11452:SF21 (PANTHER); IPR002241 (PANTHER); IPR002241 (CDD); SSF51011 (SUPERFAMILY); IPR017853 (SUPERFAMILY)	F:GO:0003824; F:GO:0004553; P:GO:0005975	F:catalytic activity; F:hydrolase activity, hydrolyzing O-glycosyl compounds; P:carbohydrate metabolic process
SPF_FS5_contig_958	[INTERPRO, BLASTED, MAPPED, GO-SLIM]	granulins-like isoform X4	720	15	5.75929e-69	64.07	1	C:GO:0005575	C:cellular_component			IPR006150 (SMART); IPR000118 (SMART); IPR000118 (PFAM); IPR037277 (G3DSA:3.10.20.GENE3D); IPR039036 (PANTHER); SSF57277 (SUPERFAMILY); SSF57277 (SUPERFAMILY); SSF57277 (SUPERFAMILY)	no GO terms	no GO terms
SPF_FS5_contig_959	[INTERPRO, BLASTED, MAPPED, GO-SLIM]	multidrug resistance-associated protein 5-like	871	15	3.17116e-93	81.8	6	F:GO:0005524; F:GO:0008514; P:GO:0015711; C:GO:0016021; F:GO:0042626; P:GO:0055085	F:ATP binding; F:organic anion transmembrane transporter activity; P:organic anion transport; C:integral component of membrane; F:ATPase-coupled transmembrane transporter activity; P:transmembrane transport	EC:3.6.1.3; EC:3.6.1.15	Adenosinetriphosphatase; Nucleoside-triphosphate phosphatase	G3DSA:3.40.50.300 (GENE3D); IPR003439 (PFAM); PTHR24223:SF277 (PANTHER); PTHR24223 (PANTHER); IPR003439 (PROSITE_PROFILES); cd03244 (CDD); IPR027417 (SUPERFAMILY)	F:GO:0005524; F:GO:0016887	F:ATP binding; F:ATPase activity
SPF_FS5_contig_961	[BLASTED, MAPPED, ANNOTATED]	serum paraoxonase/arylesterase 2	991	15	7.48937e-25	55.15	1	F:GO:0004064	F:arylesterase activity	EC:3.1.1.2; EC:3.1.1.1	Arylesterase; Carboxylesterase
SPF_FS5_contig_962	[BLASTED, MAPPED, ANNOTATED]	putative cystatin	1801	15	2.3074e-34	49.67	2	P:GO:0010466; F:GO:0030414	P:negative regulation of peptidase activity; F:peptidase inhibitor activity
SPF_FS5_contig_963	[INTERPRO, BLASTED, MAPPED, GO-SLIM]	60S ribosomal protein L13a-like	507	15	1.22553e-69	78.95	4	F:GO:0003729; F:GO:0003735; P:GO:0017148; C:GO:0022625	F:mRNA binding; F:structural constituent of ribosome; P:negative regulation of translation; C:cytosolic large ribosomal subunit			IPR005822 (PIRSF); IPR036899 (G3DSA:3.90.1180.GENE3D); IPR005755 (PTHR11545:PANTHER); IPR005822 (PANTHER); IPR036899 (SUPERFAMILY)	F:GO:0003735; C:GO:0005840; P:GO:0006412; C:GO:0015934	F:structural constituent of ribosome; C:ribosome; P:translation; C:large ribosomal subunit
SPF_FS5_contig_967	[INTERPRO, BLASTED, MAPPED, GO-SLIM]	selenoprotein K-like	1022	15	4.97442e-10	70.23	1	C:GO:0005575	C:cellular_component			IPR024491 (PFAM); mobidb-lite (MOBIDB_LITE); PTHR16875 (PANTHER); PD353114 (PRODOM)	no GO terms	no GO terms
SPF_FS5_contig_968	[INTERPRO, BLASTED, MAPPED, GO-SLIM]	probable helicase with zinc finger domain isoform X2	3998	15	0	59.6	1	F:GO:0005515	F:protein binding			IPR041679 (PFAM); G3DSA:3.40.50.300 (GENE3D); IPR011990 (G3DSA:1.25.40.GENE3D); IPR041677 (PFAM); G3DSA:3.40.50.300 (GENE3D); mobidb-lite (MOBIDB_LITE); PTHR10887:SF365 (PANTHER); PTHR10887 (PANTHER); cd00046 (CDD); IPR011990 (SUPERFAMILY); IPR027417 (SUPERFAMILY)	F:GO:0005515	F:protein binding
SPF_FS5_contig_970	[INTERPRO, BLASTED, MAPPED, GO-SLIM]	manganese-transporting ATPase 13A1-like	4404	15	0	76.71	5	F:GO:0005524; P:GO:0006812; C:GO:0016021; F:GO:0016887; F:GO:0046872	F:ATP binding; P:cation transport; C:integral component of membrane; F:ATPase activity; F:metal ion binding	EC:3.6.1.3; EC:3.6.1.15	Adenosinetriphosphatase; Nucleoside-triphosphate phosphatase	PR00119 (PRINTS); PF00702 (PFAM); IPR006544 (TIGRFAM); G3DSA:2.70.150.10 (GENE3D); IPR023299 (G3DSA:3.40.1110.GENE3D); PF00122 (PFAM); IPR023214 (G3DSA:3.40.50.GENE3D); IPR001757 (TIGRFAM); mobidb-lite (MOBIDB_LITE); PTHR24093:SF82 (PANTHER); PTHR24093 (PANTHER); cd07543 (CDD); IPR023298 (SUPERFAMILY); IPR008250 (SUPERFAMILY); IPR023299 (SUPERFAMILY); IPR036412 (SUPERFAMILY)	F:GO:0000166; P:GO:0006812; C:GO:0016021; F:GO:0016887	F:nucleotide binding; P:cation transport; C:integral component of membrane; F:ATPase activity
SPF_FS5_contig_971	[INTERPRO, BLASTED, MAPPED, GO-SLIM]	probable 28S ribosomal protein S25, mitochondrial	1076	15	5.57198e-59	71.32	2	F:GO:0003735; C:GO:0005739	F:structural constituent of ribosome; C:mitochondrion			IPR007741 (SMART); IPR007741 (PFAM); IPR040049 (PANTHER); IPR036249 (SUPERFAMILY)	F:GO:0003735; C:GO:0005739	F:structural constituent of ribosome; C:mitochondrion
SPF_FS5_contig_974	[INTERPRO, BLASTED, MAPPED, GO-SLIM]	general transcription factor IIH subunit 1-like	2690	15	0	65.92	5	C:GO:0005634; P:GO:0006259; P:GO:0006950; P:GO:0009058; C:GO:0032991	C:nucleus; P:DNA metabolic process; P:response to stress; P:biosynthetic process; C:protein-containing complex			IPR005607 (SMART); IPR011993 (G3DSA:2.30.29.GENE3D); IPR005607 (PFAM); IPR013876 (PFAM); IPR027079 (PANTHER); IPR005607 (PROSITE_PROFILES); IPR005607 (PROSITE_PROFILES); cd13229 (CDD); SSF140383 (SUPERFAMILY); SSF140383 (SUPERFAMILY); SSF50729 (SUPERFAMILY)	C:GO:0000439; P:GO:0006289; P:GO:0006351	C:transcription factor TFIIH core complex; P:nucleotide-excision repair; P:transcription, DNA-templated
[truncated: 23,041 more rows]
