# Supplementary material for: First transcriptome analysis of bryozoan Fredericella sultana, the primary host of myxozoan parasite Tetracapsuloides bryosalmonae
Source: PeerJ. 2020 Apr 28;8:e9027. doi: 10.7717/peerj.9027 (PMC7194087; doi:10.7717/peerj.9027)
Supplement: Table S5 — List of F. sultana transcripts related to proteolysis, response to stress and immune system process. This file contains transcripts associated with the GO terms: proteolysis (GO: 0006508), response to stress (GO: 0006950) and immune system process (GO: 0002376). [file peerj-08-9027-s007.xlsx]

## Sheet: Proteolysis
Transcripts with proteolysis (GO:0006508)
SeqName	Description	Length
SPF_FS5_contig_56	disintegrin and metalloproteinase domain-containing protein 10 isoform X1	1976
SPF_FS5_contig_69	putative serine protease K12H4.7	2235
SPF_FS5_contig_74	blastula protease 10-like	1275
SPF_FS5_contig_115	serine proteinase stubble-like	743
SPF_FS5_contig_202	serine protease 27-like	575
SPF_FS5_contig_229	puromycin-sensitive aminopeptidase-like	2950
SPF_FS5_contig_239	serine protease hepsin	2256
SPF_FS5_contig_264	blastula protease 10-like	842
SPF_FS5_contig_275	predicted protein	723
SPF_FS5_contig_320	glutamyl aminopeptidase-like	733
SPF_FS5_contig_336	carboxypeptidase B	2015
SPF_FS5_contig_400	peptidase	1917
SPF_FS5_contig_406	chymotrypsinogen A-like	1462
SPF_FS5_contig_460	cathepsin L	492
SPF_FS5_contig_462	serine protease hepsin	2350
SPF_FS5_contig_488	fibrinolytic enzyme, isozyme C-like	1295
SPF_FS5_contig_517	peptidase M4 family protein	1479
SPF_FS5_contig_745	blastula protease 10-like	1009
SPF_FS5_contig_781	low choriolytic enzyme-like	853
SPF_FS5_contig_883	suppressor of tumorigenicity 14 protein homolog	1425
SPF_FS5_contig_954	carboxypeptidase B-like	1596
SPF_FS5_contig_977	dipeptidase 1-like	1779
SPF_FS5_contig_1041	dipeptidyl peptidase 9 isoform X1	3404
SPF_FS5_contig_1173	calpain-B-like isoform X18	3017
SPF_FS5_contig_1255	lysosomal protective protein-like	2341
SPF_FS5_contig_1262	high choriolytic enzyme 1-like	984
SPF_FS5_contig_1273	putative aminopeptidase-2 isoform X1	8871
SPF_FS5_contig_1281	peptidase	2090
SPF_FS5_contig_1309	A disintegrin and metalloproteinase with thrombospondin motiSPF_FS5 7-like	5901
SPF_FS5_contig_1312	angiotensin-converting enzyme	2669
SPF_FS5_contig_1326	peptidoglycan-binding protein	1104
SPF_FS5_contig_1379	cytosolic non-specific dipeptidase	2095
SPF_FS5_contig_1426	carboxypeptidase B-like	1338
SPF_FS5_contig_1445	matrix metalloproteinase-17	1836
SPF_FS5_contig_1474	cysteine protease ATG4A	1432
SPF_FS5_contig_1481	suppressor of tumorigenicity 14 protein homolog	1023
SPF_FS5_contig_1492	GPI-anchor transamidase-like	1482
SPF_FS5_contig_1725	atrial natriuretic peptide-converting enzyme-like	3509
SPF_FS5_contig_1766	carboxypeptidase D-like	5975
SPF_FS5_contig_1802	calpain-B-like isoform X15	3009
SPF_FS5_contig_1904	cathepsin L1-like	1970
SPF_FS5_contig_2117	suppressor of tumorigenicity 14 protein homolog	1834
SPF_FS5_contig_2174	putative aminopeptidase W07G4.4	2029
SPF_FS5_contig_2196	aspartyl aminopeptidase	1779
SPF_FS5_contig_2223	calpain-B-like isoform X2	1496
SPF_FS5_contig_2249	tripeptidyl peptidase	1870
SPF_FS5_contig_2299	Retroviral aspartyl protease	4938
SPF_FS5_contig_2344	ADAM 17-like protease isoform X2	3150
SPF_FS5_contig_2370	caspase-3 isoform X2	603
SPF_FS5_contig_2415	PC3-like endoprotease variant B	4217
SPF_FS5_contig_2424	lysosomal Pro-X carboxypeptidase	1945
SPF_FS5_contig_2447	matrix metalloproteinase-14	2835
SPF_FS5_contig_2479	caspase-3	308
SPF_FS5_contig_2480	caspase-3-like isoform X2	1172
SPF_FS5_contig_2520	angiotensin-converting enzyme	2179
SPF_FS5_contig_2645	Methionine aminopeptidase 2	1709
SPF_FS5_contig_2658	tubulointerstitial nephritis antigen-like	2125
SPF_FS5_contig_2847	suppressor of tumorigenicity 14 protein homolog	1984
SPF_FS5_contig_2886	atrial natriuretic peptide-converting enzyme-like isoform X1	2035
SPF_FS5_contig_2887	serine protease hepsin	1655
SPF_FS5_contig_2957	endothelin-converting enzyme 1	3077
SPF_FS5_contig_2978	tubulointerstitial nephritis antigen	564
SPF_FS5_contig_3045	lysosomal protective protein	961
SPF_FS5_contig_3332	Methionine aminopeptidase 1	1413
SPF_FS5_contig_3401	chymotrypsin-like elastase family member 2A	1288
SPF_FS5_contig_3409	sentrin-specific protease 1-like	3485
SPF_FS5_contig_3540	carboxypeptidase B-like	2387
SPF_FS5_contig_3552	furin isoform X2	2353
SPF_FS5_contig_3570	PKD domain-containing protein	2110
SPF_FS5_contig_3586	matrix metalloproteinase-17	3060
SPF_FS5_contig_3601	cytosolic carboxypeptidase 2-like	2055
SPF_FS5_contig_3624	A disintegrin and metalloproteinase with thrombospondin motiSPF_FS5 14 isoform X2	4303
SPF_FS5_contig_3673	calpain-B-like isoform X2	402
SPF_FS5_contig_3801	cathepsin O-like	2245
SPF_FS5_contig_3859	caspase-8-like	3254
SPF_FS5_contig_3912	cathepsin L-like	1326
SPF_FS5_contig_4014	leishmanolysin-like peptidase	2729
SPF_FS5_contig_4095	suppressor of tumorigenicity 14 protein homolog	2586
SPF_FS5_contig_4156	beta-secretase 1-like	2165
SPF_FS5_contig_4228	neprilysin-like	2760
SPF_FS5_contig_4269	A disintegrin and metalloproteinase with thrombospondin motiSPF_FS5 6	4470
SPF_FS5_contig_4439	cathepsin L1-like	3609
SPF_FS5_contig_4452	cytosolic carboxypeptidase 2-like isoform X14	4070
SPF_FS5_contig_4513	zinc metalloproteinase nas-13-like	1237
SPF_FS5_contig_4809	balbiani ring protein 3	4426
SPF_FS5_contig_4956	angiotensin-converting enzyme isoform X1	2871
SPF_FS5_contig_5021	proprotein convertase subtilisin/kexin type 7 isoform X1	3599
SPF_FS5_contig_5046	bone morphogenetic protein 1	2084
SPF_FS5_contig_5340	paraplegin isoform X3	4426
SPF_FS5_contig_5479	acylamino-acid-releasing enzyme	3191
SPF_FS5_contig_5488	Atrial natriuretic peptide-converting enzyme	6701
SPF_FS5_contig_5490	endothelin-converting enzyme 1-like isoform X2	3953
SPF_FS5_contig_5497	leucine rich repeat protein	5883
SPF_FS5_contig_5518	matrix metallopeptidase-21-like	1970
SPF_FS5_contig_5547	mitochondrial inner membrane protease subunit 1	698
SPF_FS5_contig_5585	calpain-5-like	1248
SPF_FS5_contig_5842	AFG3-like protein 2	2923
SPF_FS5_contig_5874	predicted protein	1879
SPF_FS5_contig_5990	Membrane metallo-endopeptidase-like 1	3879
SPF_FS5_contig_6058	cathepsin L1-like	1152
SPF_FS5_contig_6232	ATP-dependent zinc metalloprotease YME1L1-like	2992
SPF_FS5_contig_6265	matrix metallopeptidase-21-like	2262
SPF_FS5_contig_6296	rhomboid-related protein 2-like	2182
SPF_FS5_contig_6355	N(4)-(beta-N-acetylglucosaminyl)-L-asparaginase isoform X1	614
SPF_FS5_contig_6356	predicted protein	596
SPF_FS5_contig_6370	chymotrypsinogen B-like	1528
SPF_FS5_contig_6552	carboxypeptidase E	2418
SPF_FS5_contig_6567	predicted protein	548
SPF_FS5_contig_7025	caspase-7 isoform X1	2078
SPF_FS5_contig_7045	caspase-8-like isoform X1	1064
SPF_FS5_contig_7093	carboxypeptidase B-like	1591
SPF_FS5_contig_7251	serine protease 27-like	1357
SPF_FS5_contig_7384	A disintegrin and metalloproteinase with thrombospondin motiSPF_FS5 16	4528
SPF_FS5_contig_7405	caspase-7-like isoform X1	990
SPF_FS5_contig_7511	carboxypeptidase B-like	938
SPF_FS5_contig_7812	peptidase M4 family protein	2189
SPF_FS5_contig_8113	balbiani ring protein 3	4485
SPF_FS5_contig_8301	carboxypeptidase D	1022
SPF_FS5_contig_8697	inactive rhomboid protein 2 isoform X1	1036
SPF_FS5_contig_8872	Neuroendocrine convertase 1	2368
SPF_FS5_contig_9077	Sonic hedgehog protein A	835
SPF_FS5_contig_9174	cysteine proteinase 1	993
SPF_FS5_contig_9425	ubiquitin carboxyl-terminal hydrolase 8 isoform X2	3334
SPF_FS5_contig_9457	androglobin-like isoform X8	6491
SPF_FS5_contig_9527	Prolyl endopeptidase	2586
SPF_FS5_contig_9678	caspase-3 isoform X2	3234
SPF_FS5_contig_9878	lysosomal protective protein	996
SPF_FS5_contig_9884	protein DDI1 homolog 2	1746
SPF_FS5_contig_10217	carboxypeptidase D-like	2199
SPF_FS5_contig_10228	calpain-9-like isoform X2	2918
SPF_FS5_contig_10325	cathepsin B	1054
SPF_FS5_contig_10341	Matrix metalloproteinase-21	1643
SPF_FS5_contig_10466	zinc metalloproteinase nas-13-like	616
SPF_FS5_contig_10502	blastula protease 10-like	862
SPF_FS5_contig_10637	blastula protease 10-like	1001
SPF_FS5_contig_10662	proprotein convertase subtilisin/kexin type 5 isoform X2	5014
SPF_FS5_contig_10924	nardilysin-like	5441
SPF_FS5_contig_11048	peptidase M4 family protein	1867
SPF_FS5_contig_11270	zinc metalloproteinase nas-13-like	2521
SPF_FS5_contig_11338	inactive rhomboid protein 1-like	1704
SPF_FS5_contig_11374	lysosomal aspartic protease	573
SPF_FS5_contig_11526	COP9 signalosome complex subunit 5	1782
SPF_FS5_contig_11601	presequence protease, mitochondrial	3306
SPF_FS5_contig_11687	zinc metalloproteinase nas-13-like	2540
SPF_FS5_contig_11786	Serine proteinase stubble	859
SPF_FS5_contig_12056	dipeptidyl peptidase 3-like	2589
SPF_FS5_contig_12086	bleomycin hydrolase	1765
SPF_FS5_contig_12118	thimet oligopeptidase-like	2410
SPF_FS5_contig_12428	pyroglutamyl-peptidase 1-like	1484
SPF_FS5_contig_12460	caspase-7 isoform X1	1011
SPF_FS5_contig_12498	peptidase M4	2039
SPF_FS5_contig_12563	trypsin I-P1-like	821
SPF_FS5_contig_12658	putative aminopeptidase W07G4.4	842
SPF_FS5_contig_12818	ubiquitin carboxyl-terminal hydrolase 25 isoform X2	4119
SPF_FS5_contig_12892	probable cytosolic oligopeptidase A	2813
SPF_FS5_contig_13040	leucine aminopeptidase-like protein	1922
SPF_FS5_contig_13085	peptidase S8	808
SPF_FS5_contig_13179	caspase-2 isoform X2	1464
SPF_FS5_contig_13227	cysteine peptidase	898
SPF_FS5_contig_13228	cysteine proteinase	705
SPF_FS5_contig_13274	calpain-B-like isoform X2	650
SPF_FS5_contig_13437	serine protease	1557
SPF_FS5_contig_13627	transposon Ty3-G gap-Pol polyprotein	1168
SPF_FS5_contig_13726	cytosolic carboxypeptidase 1-like	4512
SPF_FS5_contig_13828	chymotrypsin-like elastase family member 2A	1096
SPF_FS5_contig_14046	hypothetical protein M513_09033	1676
SPF_FS5_contig_14360	cathepsin L, putative	966
SPF_FS5_contig_14421	carboxypeptidase B	1841
SPF_FS5_contig_14426	NEDD8-activating enzyme E1 catalytic subunit isoform X3	2234
SPF_FS5_contig_14434	ubiquitin carboxyl-terminal hydrolase 30 isoform X2	2150
SPF_FS5_contig_14634	putative PEP4-aspartyl protease	1278
SPF_FS5_contig_14696	serine protease	814
SPF_FS5_contig_15023	family A2 unassigned peptidase (A02 family)	875
SPF_FS5_contig_15096	matrix metalloproteinase-21-like	864
SPF_FS5_contig_15187	Lysosomal aspartic protease	1614
SPF_FS5_contig_15646	membrane-bound transcription factor site-2 protease	1252
SPF_FS5_contig_15829	peptidase	1710
SPF_FS5_contig_16221	rhomboid-related protein 4-like	1933
SPF_FS5_contig_16676	calpain-7	3770
SPF_FS5_contig_16911	peptidase	2095
SPF_FS5_contig_16914	caspase-2	671
SPF_FS5_contig_17804	ubiquitin carboxyl-terminal hydrolase 7	3241
SPF_FS5_contig_17828	blastula protease 10-like	1610
SPF_FS5_contig_18220	sentrin-specific protease 8	1095
SPF_FS5_contig_18578	separin isoform X2	7011
SPF_FS5_contig_18621	zinc metalloproteinase nas-13-like isoform X2	956
SPF_FS5_contig_18633	caspase-7 isoform X2	969
SPF_FS5_contig_18801	leukotriene A-4 hydrolase	2347
SPF_FS5_contig_19118	suppressor of tumorigenicity 14 protein homolog	1946
SPF_FS5_contig_19437	retrotransposon protein, putative, Ty3-gypsy subclass	705
SPF_FS5_contig_19464	caspase-2	1314
SPF_FS5_contig_19465	caspase-2-like isoform X1	703
SPF_FS5_contig_20851	peptidase	363
SPF_FS5_contig_20886	zinc metalloproteinase nas-13-like isoform X2	1952
SPF_FS5_contig_21116	Atrial natriuretic peptide-converting enzyme	1820
SPF_FS5_contig_21140	glutamyl aminopeptidase-like	869
SPF_FS5_contig_21580	matrix metalloproteinase-14-like isoform X3	1031
SPF_FS5_contig_21710	ADAM 17-like protease isoform X2	2009
SPF_FS5_contig_22146	sonic hedgehog protein	934
SPF_FS5_contig_22379	PHYSA_PHYPORecName: Full=Physarolisin; AltName: Full=Physaropepsin; Contains: RecName: Full=Physarolisin heavy chain; Contains: RecName: Full=Physarolisin light chain; Flags: Precursor	530
SPF_FS5_contig_22380	pepstatin-insensitive carboxyl proteinase 1	647
SPF_FS5_contig_22384	pepstatin-insensitive carboxyl proteinase 1	677
SPF_FS5_contig_23623	chymotrypsin-like elastase family member 2A	546
SPF_FS5_contig_23724	serine protease HTRA2, mitochondrial	1861
SPF_FS5_contig_24008	peptidase S8	2872
SPF_FS5_contig_24020	seminal fluid protein	1919
SPF_FS5_contig_24380	sonic hedgehog protein	875
SPF_FS5_contig_24834	angiotensin-converting enzyme-like	1175
SPF_FS5_contig_25073	cathepsin B	1217
SPF_FS5_contig_25476	cysteine proteinase precursor, putative	921
SPF_FS5_contig_25573	predicted protein	980
SPF_FS5_contig_25900	LOC561562 protein	981
SPF_FS5_contig_25902	pepstatin-insensitive carboxyl proteinase 1	1183
SPF_FS5_contig_26612	Cathepsin B (macronuclear)	471
SPF_FS5_contig_26984	S8 family peptidase	1138
SPF_FS5_contig_27059	digestive cysteine proteinase 1	1161
SPF_FS5_contig_27604	metalloendopeptidase OMA1, mitochondrial-like	1684
SPF_FS5_contig_27731	caspase Nc-like	421
SPF_FS5_contig_28114	peptidase S8	1350
SPF_FS5_contig_28559	predicted protein	749
SPF_FS5_contig_28795	tripeptidyl-peptidase 1-like	930
SPF_FS5_contig_28958	A disintegrin and metalloproteinase with thrombospondin motiSPF_FS5 adt-1-like	499
SPF_FS5_contig_29520	cysteine proteinase 15A-like	1080
SPF_FS5_contig_30210	peroxisomal leader peptide-processing protease	1829
SPF_FS5_contig_30241	cathepsin D	1311
SPF_FS5_contig_30762	caspase 3/9	1645
SPF_FS5_contig_31193	transmembrane protease serine 9-like	661
SPF_FS5_contig_31517	furin-like protease kpc-1 isoform X2	436
SPF_FS5_contig_31828	putative cysteine proteinase CG12163	495
SPF_FS5_contig_31988	hypothetical protein	306
SPF_FS5_contig_32023	ADAM 17-like protease isoform X1	2687
SPF_FS5_contig_32390	probable serine carboxypeptidase CPVL	727
SPF_FS5_contig_32601	cathepsin L, putative	968
SPF_FS5_contig_32914	carboxypeptidase B	1045
SPF_FS5_contig_33172	Retrovirus-related Pol polyprotein from type-2 retrotransposable element R2DM	490
SPF_FS5_contig_33318	MAM and LDL-receptor class A domain-containing protein 1-like	1250
SPF_FS5_contig_33491	predicted protein	642
SPF_FS5_contig_33661	caspase domain protein	907
SPF_FS5_contig_34063	MAM and LDL-receptor class A domain-containing protein 1-like	3134
SPF_FS5_contig_34942	probable serine carboxypeptidase CPVL	480
SPF_FS5_contig_35150	insulin-degrading enzyme-like	553
SPF_FS5_contig_35507	probable serine carboxypeptidase CPVL	336
SPF_FS5_contig_35678	aspartic proteinase oryzasin-1-like	828
SPF_FS5_contig_35917	cathepsin L, putative	776
SPF_FS5_contig_36155	cysteine protease	810
SPF_FS5_contig_36424	peptidase M35	443
SPF_FS5_contig_36444	Bm6935, isoform d	773
SPF_FS5_contig_37091	calpain-15 isoform X5	425
SPF_FS5_contig_37291	cathepsin L1	559
SPF_FS5_contig_37360	zinc metalloproteinase nas-13-like	858
SPF_FS5_contig_37489	puromycin-sensitive aminopeptidase-like	418
SPF_FS5_contig_38010	cyprosin-like isoform X1	1346
SPF_FS5_contig_38293	putative subtilisin-like protease precursor	596
SPF_FS5_contig_38353	cathepsin L2	1020
SPF_FS5_contig_38988	Minor extracellular protease vpr	493
SPF_FS5_contig_39331	chymotrypsinogen A-like	531
SPF_FS5_contig_39471	rhomboid-domain-containing protein	435
SPF_FS5_contig_39592	matrix metalloproteinase-21	737
SPF_FS5_contig_39671	cysteine proteinase 15A-like	538
SPF_FS5_contig_39741	serine protease 27-like	393
SPF_FS5_contig_40281	chymotrypsin-like serine protease	498
SPF_FS5_contig_40631	carboxypeptidase B-like	440
SPF_FS5_contig_40658	cathepsin L1	620
SPF_FS5_contig_40664	S9 family peptidase	306
SPF_FS5_contig_40919	peptidase S8 and S53 subtilisin kexin sedolisin	995
SPF_FS5_contig_41163	ubiquitin carboxyl-terminal hydrolase 20-like isoform X1	311
SPF_FS5_contig_41408	meprin A beta-subunit	405
SPF_FS5_contig_41682	peptidase S8	722
SPF_FS5_contig_41852	Transposon Ty3-I Gag-Pol polyprotein	655
SPF_FS5_contig_42782	tripeptidyl peptidase	371
SPF_FS5_contig_42991	trypsin-related protease	471
SPF_FS5_contig_43457	Subtilase family protein	685
SPF_FS5_contig_44557	protease inhibitor Epi11	326
SPF_FS5_contig_45361	serine protease	776
SPF_FS5_contig_45471	caspase-9	621
SPF_FS5_contig_46012	KDEL-tailed cysteine endopeptidase CEP3	775
SPF_FS5_contig_46396	cathepsin B	1010
SPF_FS5_contig_46483	peptidase S8 and S53 subtilisin kexin sedolisin	340
SPF_FS5_contig_46623	putative serine protease K12H4.7	557
SPF_FS5_contig_46707	Propionyl-CoA carboxylase beta chain, mitochondrial	453
SPF_FS5_contig_46988	S8 family peptidase	438
SPF_FS5_contig_46990	S8 family peptidase	1168
SPF_FS5_contig_47841	peptidase S8	1079
SPF_FS5_contig_47862	bleomycin hydrolase	490
SPF_FS5_contig_48062	cathepsin F-like	557
SPF_FS5_contig_48211	peptidase S8 and S53 subtilisin kexin sedolisin	426
SPF_FS5_contig_48496	peptidase S8 and S53 domain-containing protein	484
SPF_FS5_contig_49461	peptidase S8 and S53 domain-containing protein	399
SPF_FS5_contig_49517	serine carboxypeptidase family protein	912
SPF_FS5_contig_49534	hypothetical protein YC68_24220, partial	418
SPF_FS5_contig_49668	S8 family peptidase	763
SPF_FS5_contig_49760	serine protease	475
SPF_FS5_contig_50539	probable aspartyl aminopeptidase	425
SPF_FS5_contig_51226	matrix metalloproteinase-21	1184
SPF_FS5_contig_51766	subtilisin-like serine protease-like protein PR1A	534
SPF_FS5_contig_52333	Zinc metalloproteinase nas-36	718
SPF_FS5_contig_52764	peptidase S8	807
SPF_FS5_contig_52879	uncharacterized protein K02A2.6-like	1427
SPF_FS5_contig_53990	Prokumamolisin, putative	547
SPF_FS5_contig_54191	peptidase S8	972
SPF_FS5_contig_54481	lysosomal Pro-X carboxypeptidase isoform X2	877
SPF_FS5_contig_54508	peptidase S8/S53 subtilisin kexin sedolisin	475
SPF_FS5_contig_54542	calpain-15	407
SPF_FS5_contig_55155	60S ribosomal protein L3	1177
SPF_FS5_contig_55159	tripeptidyl-peptidase 1	1268
SPF_FS5_contig_55344	carboxypeptidase A1-like	527
SPF_FS5_contig_55668	V8-like Glu-specific endopeptidase	515
SPF_FS5_contig_57621	S9 family peptidase	460
SPF_FS5_contig_58031	dipeptidyl aminopeptidase	891
SPF_FS5_contig_58454	S8 family peptidase	749
SPF_FS5_contig_59790	trypsin-3-like isoform X1	789
SPF_FS5_contig_61091	Ferrochelatase, mitochondrial	396
SPF_FS5_contig_61460	COP9 signalosome complex subunit 5	381
SPF_FS5_contig_61651	protein eyes shut homolog	373
SPF_FS5_contig_61879	carboxypeptidase B-like	436
SPF_FS5_contig_61933	Cathepsin B (macronuclear)	399
SPF_FS5_contig_62251	trypsin-like serine protease	514
SPF_FS5_contig_62465	papain family cysteine protease	597
SPF_FS5_contig_62782	carboxypeptidase B	392
SPF_FS5_contig_62805	serine protease	505
SPF_FS5_contig_63191	cathepsin L1-like	373
SPF_FS5_contig_63257	Endothelin-converting enzyme 1	765
SPF_FS5_contig_63277	predicted protein	396
SPF_FS5_contig_63386	carboxypeptidase B-like	1009
SPF_FS5_contig_63657	metalloendopeptidase OMA1, mitochondrial-like	433
SPF_FS5_contig_64627	cathepsin L2	348
SPF_FS5_contig_65140	leishmanolysin peptidase	347
SPF_FS5_contig_65259	Kazal-type serine protease inhibitor protein	628
SPF_FS5_contig_65542	peptidase	702
SPF_FS5_contig_65687	peptidase S8	476
SPF_FS5_contig_66408	zinc metalloproteinase nas-13-like	712
SPF_FS5_contig_66483	peptidase S8	440
SPF_FS5_contig_66634	COP9 signalosome complex subunit 3	368
SPF_FS5_contig_67198	peptidase S8 and S53 domain-containing protein	492
SPF_FS5_contig_67799	serine carboxypeptidase II	465
SPF_FS5_contig_68536	cathepsin L1 isoform X1	405
SPF_FS5_contig_68971	cathepsin L1	309
SPF_FS5_contig_69066	peptidase S8 and S53 domain-containing protein	430
SPF_FS5_contig_69649	serine protease	547
SPF_FS5_contig_70121	cysteine proteinase 1	480
SPF_FS5_contig_70461	S8 family peptidase	305
SPF_FS5_contig_70547	tripeptidyl-peptidase 1	550
SPF_FS5_contig_71028	cysteine proteinase 15A-like	639
SPF_FS5_contig_71180	hypothetical protein BCR41DRAFT_401006	476
SPF_FS5_contig_71970	subtilisin-like protein	376
SPF_FS5_contig_72147	cathepsin L, putative	749
SPF_FS5_contig_72483	aspartyl aminopeptidase	596
SPF_FS5_contig_73119	40S ribosomal protein S24	410
SPF_FS5_contig_73588	mitochondrial-processing peptidase subunit beta	380
SPF_FS5_contig_74094	Cathepsin F precursor, putative	886
SPF_FS5_contig_74352	serine protease	383
SPF_FS5_contig_74369	serine carboxypeptidase 24-like	431
SPF_FS5_contig_74450	peptidase S8 and S53 subtilisin kexin sedolisin	480
SPF_FS5_contig_74942	senescence-specific cysteine protease SAG39	437
SPF_FS5_contig_75334	peptidase S8	430
SPF_FS5_contig_75443	Peptidase M16 inactive domain-containing protein (macronuclear)	392
SPF_FS5_contig_75957	cathepsin B	998
SPF_FS5_contig_75985	S9 family peptidase	333
SPF_FS5_contig_76706	carboxypeptidase B-like	1162
SPF_FS5_contig_77879	PHYSA_PHYPORecName: Full=Physarolisin; AltName: Full=Physaropepsin; Contains: RecName: Full=Physarolisin heavy chain; Contains: RecName: Full=Physarolisin light chain; Flags: Precursor	414
SPF_FS5_contig_78445	sedolisinlike peptidase	381
SPF_FS5_contig_78474	cathepsin L, putative	425
SPF_FS5_contig_79125	subtilisin-like protein	679
SPF_FS5_contig_79135	carboxypeptidase B-like	392
SPF_FS5_contig_79729	Lysosomal trafficking regulator LYST and related BEACH and WD40 repeat proteins	400
SPF_FS5_contig_79831	peptidase M14, carboxypeptidase A	373
SPF_FS5_contig_80408	carboxypeptidase A2	307
SPF_FS5_contig_81287	Retrovirus-related Pol polyprotein from type-2 retrotransposable element R2DM	430
SPF_FS5_contig_81506	Zinc carboxypeptidase A 1	1364
SPF_FS5_contig_81521	calpain-B-like isoform X6	835
SPF_FS5_contig_81526	Aminopeptidase N	521
SPF_FS5_contig_81536	Carboxypeptidase A1	1019
SPF_FS5_contig_81545	Zinc carboxypeptidase A 1	955
SPF_FS5_contig_81576	serine proteinase	504
SPF_FS5_contig_81605	serine proteinase	901
SPF_FS5_contig_81643	fibrinolytic enzyme, isozyme C-like	920
SPF_FS5_contig_81644	serine proteinase	596
SPF_FS5_contig_81663	fibrinolytic enzyme	1035
SPF_FS5_contig_81664	carboxypeptidase B-like	683
SPF_FS5_contig_81709	cysteine protease CP19	866
SPF_FS5_contig_82006	fibrinolytic enzyme	963
SPF_FS5_contig_82021	Aminopeptidase N	813
SPF_FS5_contig_82120	predicted protein	400
SPF_FS5_contig_82142	cathepsin L	1408
SPF_FS5_contig_82154	carboxypeptidase B-like	1358
SPF_FS5_contig_82248	dipeptidase 1-like	933
SPF_FS5_contig_82251	retinoid-inducible serine carboxypeptidase-like	1360
SPF_FS5_contig_82280	angiotensin-converting enzyme-like	612
SPF_FS5_contig_82507	peptidase S8 and S53 domain-containing protein	966
SPF_FS5_contig_82523	carboxypeptidase B	656
SPF_FS5_contig_82555	probable serine carboxypeptidase CPVL	392
SPF_FS5_contig_82705	serine proteinase	530
SPF_FS5_contig_82859	lysosomal protective protein	451
SPF_FS5_contig_82868	predicted protein	417
SPF_FS5_contig_82925	Aminopeptidase N	579
SPF_FS5_contig_82929	TPR repeat-containing protein	636
SPF_FS5_contig_83044	carboxypeptidase B-like	625
SPF_FS5_contig_83145	serine protease inhibitor dipetalogastin-like	453
SPF_FS5_contig_83501	Aminopeptidase N	553
SPF_FS5_contig_83509	aminopeptidase N-like	790
SPF_FS5_contig_83742	zinc metalloproteinase nas-36-like	326
SPF_FS5_contig_84068	putative aminopeptidase-2 isoform X1	551
SPF_FS5_contig_84202	Carboxypeptidase A2	372
SPF_FS5_contig_84228	deleted in malignant brain tumors 1 protein-like	377
SPF_FS5_contig_84256	lysosomal protective protein-like	510
SPF_FS5_contig_84512	serine protease 44-like	439
SPF_FS5_contig_85308	peptidase S8	447
SPF_FS5_contig_85316	peptidase S8 and S53 subtilisin kexin sedolisin	404
SPF_FS5_contig_85485	S8 family peptidase	398
SPF_FS5_contig_85801	cathepsin B	495
SPF_FS5_contig_86114	ubiquitin carboxyl-terminal hydrolase 34	381
SPF_FS5_contig_86339	cathepsin B	336
SPF_FS5_contig_86355	peptidase S8	435
SPF_FS5_contig_86366	cathepsin O	342
SPF_FS5_contig_86581	trypsin-1 isoform X2	386
SPF_FS5_contig_86607	cysteine peptidase B	334
SPF_FS5_contig_86622	subtilisin-like protein	384
SPF_FS5_contig_86636	cysteine protease 1	513
SPF_FS5_contig_86667	pepstatin-insensitive carboxyl proteinase 1	373

## Sheet: Response to stress
Transcripts with response to stress (GO:0006950)
SeqName	Description	Length
SPF_FS5_contig_40	heat shock cognate 71 kDa protein	2035
SPF_FS5_contig_78	heat shock protein 83	2393
SPF_FS5_contig_139	Chorion peroxidase	844
SPF_FS5_contig_150	UPF0536 protein C12orf66 homolog	1809
SPF_FS5_contig_316	catalase	1772
SPF_FS5_contig_589	heat shock protein 70	544
SPF_FS5_contig_718	heat shock 70 kDa protein 14	1901
SPF_FS5_contig_906	AChain A, Solution structure of the fourth CH domain from human L-plastin	1045
SPF_FS5_contig_925	microtubule-actin cross-linking factor 1, isoforms 1/2/3/5-like	447
SPF_FS5_contig_974	general transcription factor IIH subunit 1-like	2690
SPF_FS5_contig_982	peroxidase-like protein	1210
SPF_FS5_contig_1003	ENSANGG00000017398 protein	546
SPF_FS5_contig_1175	ubiquitin-conjugating enzyme E2 T	1231
SPF_FS5_contig_1256	High mobility group protein DSP1	944
SPF_FS5_contig_1586	peroxidasin homolog isoform X1	1124
SPF_FS5_contig_1916	ruvB-like 1	373
SPF_FS5_contig_2098	cysteine-rich protein 1	576
SPF_FS5_contig_2189	invertebrate-type lysozyme	1093
SPF_FS5_contig_2271	nitrogen permease regulator 2-like protein	2791
SPF_FS5_contig_2507	heat shock 70 kDa protein 1-like	1465
SPF_FS5_contig_2535	78 kDa glucose-regulated protein	2386
SPF_FS5_contig_2803	predicted protein	1228
SPF_FS5_contig_2846	ras-related protein Rab6	1551
SPF_FS5_contig_2943	heme peroxidase-like protein 1	394
SPF_FS5_contig_3024	protein CREBRF homolog	4103
SPF_FS5_contig_3065	Sestrin-like protein	2448
SPF_FS5_contig_3084	hypothetical protein D910_05941	312
SPF_FS5_contig_3123	gamma-aminobutyric acid receptor-associated protein-like 2	1672
SPF_FS5_contig_3218	selenoprotein N-like	2439
SPF_FS5_contig_3915	ubiquitin-conjugating enzyme E2 A isoform X1	1443
SPF_FS5_contig_3994	ras-related GTP-binding protein A	3511
SPF_FS5_contig_4092	peptide methionine sulfoxide reductase-like	300
SPF_FS5_contig_4418	dnaJ homolog subfamily A member 1	1588
SPF_FS5_contig_4815	nucleoside diphosphate kinase homolog 5-like	961
SPF_FS5_contig_5036	High mobility group protein DSP1	1081
SPF_FS5_contig_5079	apolipoprotein D-like	471
SPF_FS5_contig_5180	ras-related GTP-binding protein C	2325
SPF_FS5_contig_5294	Brain protein I3	1510
SPF_FS5_contig_5358	cryptochrome-1 isoform X2	2238
SPF_FS5_contig_5423	apolipoprotein D-like	994
SPF_FS5_contig_5648	proliferating cell nuclear antigen	1391
SPF_FS5_contig_5673	mitochondrial uncoupling protein 4	1807
SPF_FS5_contig_5729	heat shock protein 90-1	1206
SPF_FS5_contig_5741	membralin isoform X1	2835
SPF_FS5_contig_6056	Uracil-DNA glycosylase	5085
SPF_FS5_contig_6249	HSBP1-like protein	633
SPF_FS5_contig_6420	FUCL5_ANGJARecName: Full=Fucolectin-5; Flags: Precursor	2053
SPF_FS5_contig_6695	ubiquitin-conjugating enzyme E2 J2	2497
SPF_FS5_contig_6755	mesencephalic astrocyte-derived neurotrophic factor	432
SPF_FS5_contig_6800	ATPase inhibitor, mitochondrial	552
SPF_FS5_contig_6861	pantetheinase	459
SPF_FS5_contig_6874	pantetheinase	1003
SPF_FS5_contig_7099	heat shock protein 70	2243
SPF_FS5_contig_7233	deoxycytidyl transferase	385
SPF_FS5_contig_7649	endoribonuclease ZC3H12A isoform X1	1454
SPF_FS5_contig_7829	FACT complex subunit SSRP1-like	3405
SPF_FS5_contig_7848	heat shock protein 70	1336
SPF_FS5_contig_8333	Peroxidasin-like protein	301
SPF_FS5_contig_8419	E3 ubiquitin-protein ligase RNF185	1381
SPF_FS5_contig_9492	ascorbate peroxidase precursor	360
SPF_FS5_contig_9675	DNA-directed RNA polymerase III subunit RPC2	3555
SPF_FS5_contig_9751	Solute carrier family 12 member 4	359
SPF_FS5_contig_10327	FAD-dependent oxidoreductase domain-containing protein 2-like	2177
SPF_FS5_contig_10376	tumor necrosis factor receptor superfamily, member 10d, decoy with truncated death domain	1405
SPF_FS5_contig_10417	neurofilament medium polypeptide-like isoform X2	1191
SPF_FS5_contig_10570	poly [ADP-ribose] polymerase 10	676
SPF_FS5_contig_10619	DNA repair protein REV1 isoform X1	927
SPF_FS5_contig_10640	E3 ubiquitin-protein ligase RNF185	1304
SPF_FS5_contig_11074	heat shock protein 70	2140
SPF_FS5_contig_11290	chorion peroxidase-like	612
SPF_FS5_contig_11459	E3 UFM1-protein ligase 1	2624
SPF_FS5_contig_11585	putative ascorbate peroxidase	529
SPF_FS5_contig_11753	heat shock protein 70	699
SPF_FS5_contig_11759	AChain A, Fragment-based Screening Of Hsp70 Sheds Light On The Functional Role Of Atp-binding Site Residues	1118
SPF_FS5_contig_12095	protein/nucleic acid deglycase DJ-1 isoform 2	1172
SPF_FS5_contig_12171	5' exonuclease Apollo-like	1838
SPF_FS5_contig_12399	E3 ubiquitin-protein ligase synoviolin B-like	1344
SPF_FS5_contig_12503	chorion peroxidase-like	844
SPF_FS5_contig_12761	invertebrate-type lysozyme	1210
SPF_FS5_contig_12937	endonuclease V-like isoform X1	1931
SPF_FS5_contig_13204	integrator complex subunit 3	3795
SPF_FS5_contig_13697	DNA repair protein SWI5 homolog	750
SPF_FS5_contig_13714	insulin-induced gene 2 protein isoform X1	1785
SPF_FS5_contig_14486	CLIP-associating protein 1-like	1104
SPF_FS5_contig_14796	chorion peroxidase-like isoform X2	368
SPF_FS5_contig_14900	gamma-aminobutyric acid receptor-associated protein	1453
SPF_FS5_contig_15105	myosin II heavy chain	1338
SPF_FS5_contig_15276	replication protein A 70 kDa DNA-binding subunit-like	491
SPF_FS5_contig_15489	HSP protein	462
SPF_FS5_contig_15724	fukutin isoform X1	2240
SPF_FS5_contig_15762	general transcription factor IIH subunit 3-like isoform X1	1266
SPF_FS5_contig_15771	dual specificity protein phosphatase 10 isoform X2	596
SPF_FS5_contig_16001	cGMP-dependent protein kinase 1-like	384
SPF_FS5_contig_16202	fibrinogen alpha chain	1935
SPF_FS5_contig_16493	heat shock protein	1085
SPF_FS5_contig_16883	cactin	2759
SPF_FS5_contig_16886	DNA repair protein XRCC1	2178
SPF_FS5_contig_17377	heat shock protein 90-2-like	2055
SPF_FS5_contig_17397	actin binding protein	476
SPF_FS5_contig_17428	Heat shock cognate protein	1324
SPF_FS5_contig_17429	Heat shock cognate protein	1301
SPF_FS5_contig_17614	luminal-binding protein 5	2001
SPF_FS5_contig_17621	baculoviral IAP repeat-containing protein 2	3328
SPF_FS5_contig_17676	Heat shock protein 70 (Hsp 70) family protein	2338
SPF_FS5_contig_18149	heat shock 70 kDa protein	1464
SPF_FS5_contig_18176	caltractin	531
SPF_FS5_contig_18298	actin, cytoplasmic 2	926
SPF_FS5_contig_19098	cysteine proteinase 1	462
SPF_FS5_contig_19198	Poly [ADP-ribose] polymerase 14	1655
SPF_FS5_contig_19513	78 kDa glucose-regulated protein	2147
SPF_FS5_contig_19558	dnaJ homolog subfamily B member 6-like	1378
SPF_FS5_contig_19762	cysteine-rich protein 1	470
SPF_FS5_contig_19993	Chaperonin GroL	465
SPF_FS5_contig_20077	DNA excision repair protein ERCC-6-like	4110
SPF_FS5_contig_20180	Heat shock protein Hsp90 family	537
SPF_FS5_contig_20252	very-long-chain 3-oxoacyl-CoA reductase-like	430
SPF_FS5_contig_20306	mitochondrial ATP synthase alpha subunit isoform 1	611
SPF_FS5_contig_20623	hypoxia-inducible factor 1-alpha inhibitor	1422
SPF_FS5_contig_20858	actin, cytoplasmic 2	324
SPF_FS5_contig_21112	heat shock 70 kDa protein cognate 4	1253
SPF_FS5_contig_21433	NADH dehydrogenase [ubiquinone] 1 beta subcomplex subunit 5, mitochondrial	400
SPF_FS5_contig_21641	high mobility group protein B1-like	533
SPF_FS5_contig_21868	AAA ATPase domain-containing protein	703
SPF_FS5_contig_21912	AAA ATPase domain-containing protein	1246
SPF_FS5_contig_22047	Heat shock cognate 70 kDa protein	2067
SPF_FS5_contig_22130	beclin 1-associated autophagy-related key regulator	1804
SPF_FS5_contig_22464	stress-70 protein, mitochondrial-like	375
SPF_FS5_contig_22825	component of the counting factor complex	351
SPF_FS5_contig_23579	putative RNA-directed DNA polymerase from transposon BS	560
SPF_FS5_contig_23652	putative mediator of RNA polymerase II transcription subunit 37c	1276
SPF_FS5_contig_23653	Heat shock 70 kDa protein	1063
SPF_FS5_contig_23759	sprT-like domain-containing protein Spartan	701
SPF_FS5_contig_24631	eukaryotic translation initiation factor 2-alpha kinase 4	1202
SPF_FS5_contig_24921	putative RNA-directed DNA polymerase from transposon BS	873
SPF_FS5_contig_25181	actin, cytoplasmic 2	905
SPF_FS5_contig_25367	Fanconi anemia group I protein	910
SPF_FS5_contig_25668	heat shock protein	969
SPF_FS5_contig_25672	AAA ATPase domain-containing protein	402
SPF_FS5_contig_25798	78 kDa glucose-regulated protein-like	653
SPF_FS5_contig_26147	heat shock protein 90-2-like	1504
SPF_FS5_contig_26462	alpha actinin	447
SPF_FS5_contig_26472	Ras GTPase	303
SPF_FS5_contig_26621	AP-5 complex subunit sigma-1	1400
SPF_FS5_contig_26762	severin kinase	397
SPF_FS5_contig_26786	heat shock protein 90	2103
SPF_FS5_contig_27292	elongation factor 2	1105
SPF_FS5_contig_27363	predicted protein	2532
SPF_FS5_contig_27448	elongation factor 2	571
SPF_FS5_contig_27873	heat shock protein	510
SPF_FS5_contig_28074	DNA polymerase epsilon subunit 3	855
SPF_FS5_contig_28248	general transcription factor IIH subunit 4	600
SPF_FS5_contig_28288	hsp70-like protein	677
SPF_FS5_contig_28471	sterol regulatory element-binding protein 1 isoform X2	437
SPF_FS5_contig_28681	heat shock protein	1494
SPF_FS5_contig_28995	Single-strand selective monofunctional uracil DNA glycosylase	306
SPF_FS5_contig_29262	alpha actinin	2144
SPF_FS5_contig_29314	endoplasmin	2209
SPF_FS5_contig_29413	transitional endoplasmic reticulum ATPase, putative	1465
SPF_FS5_contig_29495	heat shock protein 90	2300
SPF_FS5_contig_30110	HSP90-domain-containing protein	2169
SPF_FS5_contig_30124	peroxiredoxin-5, mitochondrial-like	418
SPF_FS5_contig_30150	protein artemis	2108
SPF_FS5_contig_30190	heat shock protein 90	2217
SPF_FS5_contig_30457	guanine nucleotide-binding protein G(o) subunit alpha-like	340
SPF_FS5_contig_30540	general transcription factor IIH subunit 4	1978
SPF_FS5_contig_30590	ATP-dependent chaperone ClpB	482
SPF_FS5_contig_30995	Cell division cycle protein 48	2136
SPF_FS5_contig_31137	heat shock protein 70	473
SPF_FS5_contig_31261	hsp71-like protein	1148
SPF_FS5_contig_32422	swi5-dependent recombination DNA repair protein 1 homolog isoform X2	1284
SPF_FS5_contig_32451	SWI/SNF-related matrix-associated actin-dependent regulator of chromatin subfamily A containing DEAD/H box 1	478
SPF_FS5_contig_32462	UV excision repair protein Rad23	361
SPF_FS5_contig_32692	AChain A, Structure Of Hsp90 With Small Molecule Inhibitor Bound	657
SPF_FS5_contig_32702	Hsp90 protein, putative	1095
SPF_FS5_contig_33182	autophagy protein 8	379
SPF_FS5_contig_33890	ubiquitin-conjugating enzyme E2 J2-like	555
SPF_FS5_contig_34058	heat shock protein	674
SPF_FS5_contig_34228	Destabilase family and Lysozyme-like domain-containing protein	2024
SPF_FS5_contig_34479	HMG-box	867
SPF_FS5_contig_34758	high mobility group protein B3-like	804
SPF_FS5_contig_34836	COP9 signalosome complex subunit 1	374
SPF_FS5_contig_34957	heat shock protein	1536
SPF_FS5_contig_34987	hsp70-like protein	1911
SPF_FS5_contig_35007	elongation factor 2	737
SPF_FS5_contig_35008	elongation factor 2	423
SPF_FS5_contig_35258	IP6K2 isoform 8	1676
SPF_FS5_contig_35291	component of the counting factor complex	690
SPF_FS5_contig_35294	Serine/threonine-protein kinase/endoribonuclease IRE1	1007
SPF_FS5_contig_35332	high mobility group protein B2 isoform X2	347
SPF_FS5_contig_35729	luminal binding protein	556
SPF_FS5_contig_35731	heat shock protein 90-1-like	747
SPF_FS5_contig_35754	heat shock protein	836
SPF_FS5_contig_36368	AAA ATPase domain-containing protein	979
SPF_FS5_contig_36491	fucolectin-like	483
SPF_FS5_contig_36592	death-associated inhibitor of apoptosis 2-like	336
SPF_FS5_contig_36627	ATP-dependent DNA helicase Q4-like	412
SPF_FS5_contig_36994	frizzled-5	602
SPF_FS5_contig_37045	chaperone DnaJ	443
SPF_FS5_contig_37047	14-3-3 protein 9	346
SPF_FS5_contig_37179	soma ferritin	542
SPF_FS5_contig_37793	70 kDa heat shock protein, putative	503
SPF_FS5_contig_38147	heat shock protein	2161
SPF_FS5_contig_38677	Major vault protein	799
SPF_FS5_contig_38695	cell division cycle protein 48	379
SPF_FS5_contig_38719	actin, alpha skeletal muscle	308
SPF_FS5_contig_38791	ubiquitin-conjugating enzyme E2 D2	660
SPF_FS5_contig_38815	Exonuclease 1	951
SPF_FS5_contig_39327	heat shock protein Hsp70 family protein	2055
SPF_FS5_contig_39512	coronin-1C isoform X2	341
SPF_FS5_contig_39889	DNA repair protein	413
SPF_FS5_contig_40181	cell division control protein 48 homolog D	2055
SPF_FS5_contig_40188	Hypoxia up-regulated protein 1	421
SPF_FS5_contig_40450	Transitional endoplasmic reticulum ATPase	487
SPF_FS5_contig_40882	interleukin enhancer-binding factor 3-A isoform X1	906
SPF_FS5_contig_41143	heat shock 70 kDa protein cognate 3	386
SPF_FS5_contig_41259	heat shock protein 70	514
SPF_FS5_contig_41378	P-loop containing nucleoside triphosphate hydrolase protein	864
SPF_FS5_contig_41400	cell division cycle protein 48	927
SPF_FS5_contig_41588	heat shock protein	477
SPF_FS5_contig_41642	heat shock protein 83	421
SPF_FS5_contig_41886	non-homologous end-joining factor 1-like	773
SPF_FS5_contig_41919	78 kDa glucose-regulated protein	836
SPF_FS5_contig_41993	transitional endoplasmic reticulum ATPase	1581
SPF_FS5_contig_42095	heat shock protein 90	751
SPF_FS5_contig_42383	AAA family ATPase, CDC48 subfamily	540
SPF_FS5_contig_42412	ER-type hsp70	410
SPF_FS5_contig_42580	component of the counting factor complex	358
SPF_FS5_contig_42697	putative RNA-directed DNA polymerase from transposon BS	741
SPF_FS5_contig_42759	heat shock protein 90	485
SPF_FS5_contig_42868	82 kDa heat shock protein	1083
SPF_FS5_contig_42997	heat shock protein 70	868
SPF_FS5_contig_43183	hsp77-like protein	1033
SPF_FS5_contig_43864	phosphatidylinositol 4-kinase gamma 2	517
SPF_FS5_contig_44260	receptor-like protein 12	401
SPF_FS5_contig_44335	ras-like GTP-binding protein RhoL	347
SPF_FS5_contig_44421	chaperonin protein BiP	461
SPF_FS5_contig_45009	putative tyrosine-protein kinase	303
SPF_FS5_contig_45201	Glutamate--cysteine ligase	325
SPF_FS5_contig_45291	heat shock cognate 70	383
SPF_FS5_contig_45345	DnaJ subfamily A member 2	508
SPF_FS5_contig_45482	60S ribosomal protein L20A	505
SPF_FS5_contig_45569	DNA repair protein REV1	358
SPF_FS5_contig_45865	78 kDa glucose-regulated protein	1150
SPF_FS5_contig_46057	heat shock protein 90	487
SPF_FS5_contig_46120	heme peroxidase	616
SPF_FS5_contig_46258	78 kDa glucose-regulated protein	695
SPF_FS5_contig_46299	ankyrin repeat-containing domain protein	365
SPF_FS5_contig_46571	Rab GTPase	464
SPF_FS5_contig_46757	AAA ATPase domain-containing protein	887
SPF_FS5_contig_47283	kinetoplastid membrane protein KMP-11	348
SPF_FS5_contig_47404	putative chaperone protein DnaK	680
SPF_FS5_contig_47465	DUF1900-domain-containing protein	541
SPF_FS5_contig_48075	myoferlin-like isoform X3	619
SPF_FS5_contig_48159	proliferating cell nuclear antigen-like	507
SPF_FS5_contig_48417	gamma-aminobutyric acid receptor-associated protein	345
SPF_FS5_contig_48749	protein disulfide-isomerase A6	587
SPF_FS5_contig_49009	adenylyl cyclase-associated protein 1	546
SPF_FS5_contig_49132	related to alpha-actinin	637
SPF_FS5_contig_49171	DNA ligase 3-like	424
SPF_FS5_contig_49370	heat shock protein	427
SPF_FS5_contig_49515	AAA ATPase domain-containing protein	505
SPF_FS5_contig_50106	heat shock protein 90	1366
SPF_FS5_contig_50114	heat shock protein 70	384
SPF_FS5_contig_50306	Heat shock protein 90-2	333
SPF_FS5_contig_50734	heat shock protein 70A	529
SPF_FS5_contig_51018	RNA-directed DNA polymerase from mobile element jockey-like	818
SPF_FS5_contig_51338	heat shock protein 90-2-like	731
SPF_FS5_contig_51682	putative RNA-directed DNA polymerase from mobile element jockey-like	451
SPF_FS5_contig_51813	meiotic recombination protein DMC1/LIM15 homolog isoform X2	477
SPF_FS5_contig_51866	Hsp70 chaperone BiP/Kar2, putative	1987
SPF_FS5_contig_51915	autophagy protein 8	355
SPF_FS5_contig_52048	zf-ZPR1-domain-containing protein	394
SPF_FS5_contig_52566	hsp83-like protein	739
SPF_FS5_contig_52783	Phosphatase PSR1 [	425
SPF_FS5_contig_53271	putative RNA-directed DNA polymerase from transposon BS	417
SPF_FS5_contig_53289	heat shock 70 kDa protein cognate 4	1069
SPF_FS5_contig_53512	heat shock protein 90	407
SPF_FS5_contig_53542	Apolipoprotein D	396
SPF_FS5_contig_53632	luminal binding protein	400
SPF_FS5_contig_54068	HSP protein	426
SPF_FS5_contig_54798	ATP-dependent DNA helicase Q4	867
SPF_FS5_contig_54960	nucleoside diphosphate kinase homolog 5-like	577
SPF_FS5_contig_55383	GTP-binding protein ypt3	342
SPF_FS5_contig_55615	predicted protein	1063
SPF_FS5_contig_55782	calreticulin	354
SPF_FS5_contig_55957	Elongation factor 2	667
SPF_FS5_contig_56008	eyes absent	817
SPF_FS5_contig_56030	component of the counting factor complex	675
SPF_FS5_contig_56079	Endoplasmin precursor, putative	465
SPF_FS5_contig_56100	heat shock protein	980
SPF_FS5_contig_56110	Chorion peroxidase	814
SPF_FS5_contig_56355	PhoPQ-activated pathogenicity-related protein	376
SPF_FS5_contig_56439	cysteine proteinase 1	756
SPF_FS5_contig_56445	heat shock protein 90	1263
SPF_FS5_contig_56629	heat shock protein HSP90	842
SPF_FS5_contig_56641	peptidyl-prolyl cis-trans isomerase-like	314
SPF_FS5_contig_56643	ATP synthase subunit alpha, mitochondrial	582
SPF_FS5_contig_56777	putative GTP-binding protein	346
SPF_FS5_contig_57124	glucose-regulated protein	610
SPF_FS5_contig_57372	RNA-directed DNA polymerase from mobile element jockey-like	415
SPF_FS5_contig_57545	chaperonin 60	425
SPF_FS5_contig_57971	chorion peroxidase-like	520
SPF_FS5_contig_57975	putative spectrin alpha chain, non-erythrocytic 1	434
SPF_FS5_contig_58658	estradiol 17 beta-dehydrogenase, putative	335
SPF_FS5_contig_59131	ras-related protein Rab-1A	478
SPF_FS5_contig_59318	hypoxia up-regulated protein 1	567
SPF_FS5_contig_59496	stress-70 protein, mitochondrial	432
SPF_FS5_contig_60412	ATP-dependent chaperone ClpB	359
SPF_FS5_contig_61559	actin binding protein	409
SPF_FS5_contig_61644	delta-5 desaturase	405
SPF_FS5_contig_61861	Heat shock cognate 70 kDa protein	386
SPF_FS5_contig_62244	AChain A, Human Hsp90 Alpha N-terminal Domain In Complex With An Aminotriazoloquinazoline Inhibitor	735
SPF_FS5_contig_62456	RNA-directed DNA polymerase from mobile element jockey-like	454
SPF_FS5_contig_62683	ATP-dependent DNA helicase PIF1	541
SPF_FS5_contig_63054	E3 ubiquitin-protein ligase TRIP12 isoform X1	496
SPF_FS5_contig_63178	DUF1900-domain-containing protein	736
SPF_FS5_contig_63229	fizzy-related protein homolog isoform X3	553
SPF_FS5_contig_63482	synaptosomal-associated protein 23	455
SPF_FS5_contig_63536	heat shock protein 90	622
SPF_FS5_contig_63843	ras-related protein Rab-11A	374
SPF_FS5_contig_64101	protein disulfide-isomerase A6	378
SPF_FS5_contig_64144	ATP-binding cassette sub-family E member 1	355
SPF_FS5_contig_64311	C2 calcium-dependent domain-containing protein 4C-like	577
SPF_FS5_contig_64712	stromal cell-derived factor 2-like	345
SPF_FS5_contig_64974	heat shock cognate 70 kDa protein 2-like	349
SPF_FS5_contig_65109	90 kDa heat shock protein	429
SPF_FS5_contig_65763	DUF614 family protein	316
SPF_FS5_contig_65791	AAA ATPase domain-containing protein	810
SPF_FS5_contig_65955	Thioredoxin-2	366
SPF_FS5_contig_66830	ras-related protein RABE1c	333
SPF_FS5_contig_66966	lysozyme	405
SPF_FS5_contig_67311	stress-70 protein, mitochondrial	538
SPF_FS5_contig_67429	14-3-3 protein	371
SPF_FS5_contig_67976	chromodomain-helicase-DNA-binding protein 1-like	653
SPF_FS5_contig_68258	heat shock protein 90, putative	311
SPF_FS5_contig_68428	putative glucose-regulated protein 78	404
SPF_FS5_contig_68583	isocitrate dehydrogenase [NADP] cytoplasmic	399
SPF_FS5_contig_68640	hsp70-like protein	518
SPF_FS5_contig_69043	chorion peroxidase-like	753
SPF_FS5_contig_69240	autophagy protein 5	374
SPF_FS5_contig_69266	Heat shock protein 90	845
SPF_FS5_contig_69655	heat shock 70 kDa protein, mitochondrial	495
SPF_FS5_contig_69933	Serine/threonine-protein phosphatase PP1-2 [	339
SPF_FS5_contig_70348	interleukin enhancer-binding factor 3	497
SPF_FS5_contig_70431	catalase	430
SPF_FS5_contig_70444	Gamma-aminobutyric acid receptor-associated protein-like 2	533
SPF_FS5_contig_70624	putative RNA-directed DNA polymerase from transposon X-element	375
SPF_FS5_contig_70625	protein disulfide isomerase	328
SPF_FS5_contig_70730	bifunctional enolase 2/transcriptional activator	729
SPF_FS5_contig_70779	peptidyl-prolyl cis-trans isomerase-like	477
SPF_FS5_contig_70957	Hsp90 beta	417
SPF_FS5_contig_71049	protein heat shock protein	510
SPF_FS5_contig_71420	legumain	594
SPF_FS5_contig_71450	putative tyrosine-protein kinase	538
SPF_FS5_contig_72018	heat shock protein	434
SPF_FS5_contig_72143	putative heat shock protein 85	394
SPF_FS5_contig_72265	histone H2B	437
SPF_FS5_contig_72366	heat shock protein 70	463
SPF_FS5_contig_72584	heat shock protein	624
SPF_FS5_contig_72757	protein phosphatase 2B	328
SPF_FS5_contig_72897	alpha actinin	655
SPF_FS5_contig_73167	heat shock protein 90	398
SPF_FS5_contig_73281	Ubc5p	420
SPF_FS5_contig_73575	chaperone protein ClpB1-like	494
SPF_FS5_contig_73585	alpha actinin	579
SPF_FS5_contig_73613	actin, alpha skeletal muscle	388
SPF_FS5_contig_73622	COP9 signalosome complex subunit 1	395
SPF_FS5_contig_73790	stress-inducible protein	440
SPF_FS5_contig_73961	lysosomal Pro-X carboxypeptidase	459
SPF_FS5_contig_74350	Elongation factor 2	828
SPF_FS5_contig_74498	DUF614 family protein	356
SPF_FS5_contig_74581	heat shock protein Hsp70 family protein	338
SPF_FS5_contig_74615	ATP-dependent chaperone ClpB	461
SPF_FS5_contig_74929	Calreticulin like	317
SPF_FS5_contig_75025	transitional endoplasmic reticulum ATPase	491
SPF_FS5_contig_75125	cytochrome c peroxidase	507
SPF_FS5_contig_75377	protein CREBRF homolog	419
SPF_FS5_contig_75452	DUF1900-domain-containing protein	687
SPF_FS5_contig_76881	histone H4	346
SPF_FS5_contig_76960	histone H2B type 1-F/J/L	428
SPF_FS5_contig_77611	heat shock protein HSP82	429
SPF_FS5_contig_77823	molecular chaperone DnaJ	387
SPF_FS5_contig_78467	Heat Shock Protein 90, endoplasmic reticulum	394
SPF_FS5_contig_78676	heat shock protein 70	494
SPF_FS5_contig_78742	RasGTPase-activating protein	488
SPF_FS5_contig_78874	ribonucleoside-diphosphate reductase subunit alpha	385
SPF_FS5_contig_79023	binding protein	383
SPF_FS5_contig_79154	AAA ATPase domain-containing protein	734
SPF_FS5_contig_79327	P-loop containing nucleoside triphosphate hydrolase protein	730
SPF_FS5_contig_79639	AAA ATPase domain-containing protein	355
SPF_FS5_contig_79743	heat shock protein	992
SPF_FS5_contig_79919	ubiquitin-conjugating enzyme E2 2	438
SPF_FS5_contig_80245	chaperone protein DnaK	428
SPF_FS5_contig_81294	tolloid-like protein 1	390
SPF_FS5_contig_81652	78 kDa glucose-regulated protein	1100
SPF_FS5_contig_81682	78 kDa glucose-regulated protein	783
SPF_FS5_contig_81792	beta-1,3-glucan-binding protein-like	641
SPF_FS5_contig_81832	endoplasmin	417
SPF_FS5_contig_81900	60S ribosomal protein L11	671
SPF_FS5_contig_81979	60S ribosomal protein L11	555
SPF_FS5_contig_81994	High mobility group protein DSP1	574
SPF_FS5_contig_82121	gamma-aminobutyric acid receptor-associated protein	507
SPF_FS5_contig_82176	Protein disulfide-isomerase 2	449
SPF_FS5_contig_82235	sodium/potassium-transporting ATPase subunit alpha-2 isoform X2	1042
SPF_FS5_contig_82253	peptidoglycan-recognition protein SC2-like	515
SPF_FS5_contig_82318	cdc42 homolog	366
SPF_FS5_contig_82349	Catalase	1459
SPF_FS5_contig_82358	78 kDa glucose-regulated protein-like	549
SPF_FS5_contig_82908	Peroxiredoxin-4	341
SPF_FS5_contig_83036	cytoplasmic heat shock protein 70	422
SPF_FS5_contig_83096	catalase	688
SPF_FS5_contig_83104	26S protease regulatory subunit 8	474
SPF_FS5_contig_83109	Ras-related protein Rac1	563
SPF_FS5_contig_83205	14-3-3 1 protein	534
SPF_FS5_contig_83247	Heat shock 70 kDa protein C	363
SPF_FS5_contig_83266	alpha actinin	424
SPF_FS5_contig_83475	gamma-aminobutyric acid receptor-associated protein-like	337
SPF_FS5_contig_83583	heat shock factor-binding protein 1	427
SPF_FS5_contig_83771	78 kDa glucose-regulated protein	554
SPF_FS5_contig_83813	histone H2A	520
SPF_FS5_contig_83836	eukaryotic translation initiation factor 4E-binding protein 1	434
SPF_FS5_contig_83865	N-alpha-acetyltransferase 10	368
SPF_FS5_contig_84088	peroxiredoxin-5, mitochondrial	507
SPF_FS5_contig_84138	fat-like cadherin-related tumor suppressor homolog isoform X6	657
SPF_FS5_contig_84201	hypoxia up-regulated protein 1	423
SPF_FS5_contig_84269	78 kDa glucose-regulated protein-like	566
SPF_FS5_contig_84295	ras-related protein Rab-1A	547
SPF_FS5_contig_84307	heat shock 70 kDa protein, mitochondrial	725
SPF_FS5_contig_84343	chaperone protein dnaj	399
SPF_FS5_contig_84367	glutathione peroxidase-like	348
SPF_FS5_contig_84464	P-loop containing nucleoside triphosphate hydrolase protein	405
SPF_FS5_contig_84514	Heat shock protein Hsp90	471
SPF_FS5_contig_84666	78 kDa glucose-regulated protein-like	494
SPF_FS5_contig_84855	DnaK family protein	372
SPF_FS5_contig_84881	luminal binding protein BiP	528
SPF_FS5_contig_84910	gamma-aminobutyric acid receptor-associated protein	351
SPF_FS5_contig_84942	ATP-binding cassette sub-family E member 1	625
SPF_FS5_contig_85235	catalase	363
SPF_FS5_contig_85366	elongation factor 2	376
SPF_FS5_contig_85497	eIF-2-alpha kinase GCN2-like	417
SPF_FS5_contig_85619	autophagy protein 8	399
SPF_FS5_contig_85634	nuclear factor erythroid 2-related factor 1 isoform X1	351
SPF_FS5_contig_85751	heat shock protein 70	381
SPF_FS5_contig_85857	26S protease regulatory subunit 10B	375
SPF_FS5_contig_85863	heat shock protein 70 B2	428
SPF_FS5_contig_86091	Heat shock 70 kDa protein 3	444
SPF_FS5_contig_86156	Cyclase-associated protein 1	393
SPF_FS5_contig_86158	chaperone protein ClpB1	360
SPF_FS5_contig_86577	catalase	374
SPF_FS5_contig_86697	Elongation factor 2	522

## Sheet: Immune system process
Transcripts with immune system process (GO:0002376)
SeqName	Description	Length
SPF_FS5_contig_630	interleukin-1 receptor-associated kinase 4 isoform X1	2434
SPF_FS5_contig_906	AChain A, Solution structure of the fourth CH domain from human L-plastin	1045
SPF_FS5_contig_1055	protein toll-like	959
SPF_FS5_contig_1256	High mobility group protein DSP1	944
SPF_FS5_contig_1551	C-type lectin domain family 10 member A-like	1472
SPF_FS5_contig_1552	galactose-specific lectin nattectin-like	1665
SPF_FS5_contig_2019	ras-related protein Rab-11A	1446
SPF_FS5_contig_3897	perlucin-like protein	1885
SPF_FS5_contig_3909	Adenosine deaminase	1846
SPF_FS5_contig_5036	High mobility group protein DSP1	1081
SPF_FS5_contig_5260	calcineurin subunit B type 1	1209
SPF_FS5_contig_6056	Uracil-DNA glycosylase	5085
SPF_FS5_contig_6171	calcineurin subunit B type 1	1098
SPF_FS5_contig_6481	ragulator complex protein LAMTOR2	1737
SPF_FS5_contig_6793	hypoxanthine-guanine phosphoribosyltransferase	1115
SPF_FS5_contig_6800	ATPase inhibitor, mitochondrial	552
SPF_FS5_contig_7541	epididymal secretory protein E1 isoform X2	915
SPF_FS5_contig_7649	endoribonuclease ZC3H12A isoform X1	1454
SPF_FS5_contig_8769	protein toll-like	1456
SPF_FS5_contig_9033	PCI domain-containing protein 2	1696
SPF_FS5_contig_9339	E3 ubiquitin-protein ligase TRIM56	2511
SPF_FS5_contig_9675	DNA-directed RNA polymerase III subunit RPC2	3555
SPF_FS5_contig_10376	tumor necrosis factor receptor superfamily, member 10d, decoy with truncated death domain	1405
SPF_FS5_contig_10898	protein yippee-like 5	1027
SPF_FS5_contig_11103	protein FAM49B isoform X1	1999
SPF_FS5_contig_11119	hypoxanthine-guanine phosphoribosyltransferase	1267
SPF_FS5_contig_11440	toll-like receptor 4	1338
SPF_FS5_contig_12095	protein/nucleic acid deglycase DJ-1 isoform 2	1172
SPF_FS5_contig_12587	ADP-ribosylation factor 1	801
SPF_FS5_contig_12750	toll-like receptor 13	546
SPF_FS5_contig_13760	apoptosis regulatory protein Siva-like	459
SPF_FS5_contig_14229	ubiquitin thioesterase OTUB1	1254
SPF_FS5_contig_14461	transcription initiation factor TFIID subunit 3	2105
SPF_FS5_contig_14598	putative transcription factor capicua isoform X1	5586
SPF_FS5_contig_15459	E3 ubiquitin-protein ligase TRIM56	2747
SPF_FS5_contig_15716	histone deacetylase 9 isoform X5	2179
SPF_FS5_contig_15771	dual specificity protein phosphatase 10 isoform X2	596
SPF_FS5_contig_16883	cactin	2759
SPF_FS5_contig_17190	Ferrochelatase, mitochondrial	1734
SPF_FS5_contig_17621	baculoviral IAP repeat-containing protein 2	3328
SPF_FS5_contig_18774	Serine/threonine-protein phosphatase 2A regulatory subunit B'' subunit gamma	1973
SPF_FS5_contig_19198	Poly [ADP-ribose] polymerase 14	1655
SPF_FS5_contig_20338	zinc finger protein Gfi-1b-like	821
SPF_FS5_contig_20588	deleted in malignant brain tumors 1 protein-like isoform X2	329
SPF_FS5_contig_21492	CCAAT/enhancer-binding protein gamma	1165
SPF_FS5_contig_21641	high mobility group protein B1-like	533
SPF_FS5_contig_21952	marginal zone B- and B1-cell-specific protein-like	1656
SPF_FS5_contig_23769	progesterone-induced-blocking factor 1-like	2360
SPF_FS5_contig_24631	eukaryotic translation initiation factor 2-alpha kinase 4	1202
SPF_FS5_contig_26203	nuclear pore complex protein Nup85	720
SPF_FS5_contig_27292	elongation factor 2	1105
SPF_FS5_contig_28690	leucine Rich repeat-containing domain protein	1291
SPF_FS5_contig_33702	zinc finger protein Gfi-1b-like	643
SPF_FS5_contig_34758	high mobility group protein B3-like	804
SPF_FS5_contig_35007	elongation factor 2	737
SPF_FS5_contig_35008	elongation factor 2	423
SPF_FS5_contig_35258	IP6K2 isoform 8	1676
SPF_FS5_contig_35731	heat shock protein 90-1-like	747
SPF_FS5_contig_36386	Calcium/calmodulin-dependent protein kinase type IV	1004
SPF_FS5_contig_36592	death-associated inhibitor of apoptosis 2-like	336
SPF_FS5_contig_36994	frizzled-5	602
SPF_FS5_contig_38468	ADP-ribosylation factor 1	632
SPF_FS5_contig_38791	ubiquitin-conjugating enzyme E2 D2	660
SPF_FS5_contig_39225	complement receptor type 1 isoform X1	791
SPF_FS5_contig_39386	Toll-like receptor 3	730
SPF_FS5_contig_40882	interleukin enhancer-binding factor 3-A isoform X1	906
SPF_FS5_contig_40998	leucine-rich repeats and immunoglobulin-like domains protein 1	331
SPF_FS5_contig_41878	carboxypeptidase N subunit 2-like	331
SPF_FS5_contig_42309	multidrug resistance-associated protein 5-like	642
SPF_FS5_contig_42519	toll-like receptor 3	465
SPF_FS5_contig_43110	lysosomal protective protein	439
SPF_FS5_contig_45844	ras-related protein Rab-18	351
SPF_FS5_contig_48499	chondroadherin-like protein	606
SPF_FS5_contig_51333	DNA replication licensing factor mcm2	418
SPF_FS5_contig_51338	heat shock protein 90-2-like	731
SPF_FS5_contig_53550	serine/threonine-protein kinase RIO3	1603
SPF_FS5_contig_55957	Elongation factor 2	667
SPF_FS5_contig_59343	MDS1 and EVI1 complex locus protein EVI1 isoform X7	447
SPF_FS5_contig_59496	stress-70 protein, mitochondrial	432
SPF_FS5_contig_61662	toll-like receptor 7	330
SPF_FS5_contig_63100	toll-like receptor 13	439
SPF_FS5_contig_63482	synaptosomal-associated protein 23	455
SPF_FS5_contig_64144	ATP-binding cassette sub-family E member 1	355
SPF_FS5_contig_67311	stress-70 protein, mitochondrial	538
SPF_FS5_contig_70348	interleukin enhancer-binding factor 3	497
SPF_FS5_contig_70779	peptidyl-prolyl cis-trans isomerase-like	477
SPF_FS5_contig_70912	tyrosine-protein kinase receptor Tie-1 isoform X1	399
SPF_FS5_contig_71364	toll-like receptor 4	473
SPF_FS5_contig_72122	SET and MYND domain-containing protein 5	452
SPF_FS5_contig_72322	protein DPCD	434
SPF_FS5_contig_76960	histone H2B type 1-F/J/L	428
SPF_FS5_contig_78198	nucleoside diphosphate kinase	418
SPF_FS5_contig_80907	ADP-ribosylation factor 1	559
SPF_FS5_contig_81792	beta-1,3-glucan-binding protein-like	641
SPF_FS5_contig_81900	60S ribosomal protein L11	671
SPF_FS5_contig_81979	60S ribosomal protein L11	555
SPF_FS5_contig_81994	High mobility group protein DSP1	574
SPF_FS5_contig_82253	peptidoglycan-recognition protein SC2-like	515
SPF_FS5_contig_82318	cdc42 homolog	366
SPF_FS5_contig_83109	Ras-related protein Rac1	563
SPF_FS5_contig_84166	serine/threonine-protein kinase PINK1, mitochondrial	556
SPF_FS5_contig_84942	ATP-binding cassette sub-family E member 1	625
